# Supplementary material
Source: publisher figshare collection journal article supplement (https://acs.figshare.com/ndownloader/files/4218127)

# Supporting Information

## Rh-Catalyzed Ortho-Selective C–H Borylation of *N*-Functionalized Arenes with Silica-Supported Bridgehead Monophosphine Ligands

Soichiro Kawamorita, Tatsuya Miyazaki, Hirohisa Ohmiya, Tomohiro Iwai and Masaya Sawamura\*  
*Department of Chemistry, Faculty of Science, Hokkaido University, Sapporo 060-0810, Japan*

### Table of Contents

|                                                                                                |          |
|------------------------------------------------------------------------------------------------|----------|
| Instrumentation and Chemicals                                                                  | S1–S2    |
| Preparation of Ligands                                                                         | S2–S4    |
| Experimental Procedure for Borylation                                                          | S4–S5    |
| Metal Screening for the Borylation (Table S1)                                                  | S5       |
| Ligand Effects (Table S2)                                                                      | S6       |
| Complementary Use of the Silica-SMAP–Rh and Silica-SMAP–Ir Systems<br>(Scheme S1 and Table S3) | S6–S7    |
| Preparation of Substrates                                                                      | S8–S9    |
| Characterization of Borylation Products                                                        | S9–S15   |
| References                                                                                     | S15–S16  |
| NMR Spectra                                                                                    | S17–S115 |

### Instrumentation and Chemicals

Solution NMR spectra were recorded on a Varian Gemini 2000 spectrometer, operating at 300 MHz for  $^1\text{H}$  NMR, 75.4 MHz for  $^{13}\text{C}$  NMR and 121.4 MHz for  $^{31}\text{P}$  NMR. Chemical shift values for  $^1\text{H}$  and  $^{13}\text{C}$  are reference to  $\text{Me}_4\text{Si}$  and the residual solvent resonances respectively, and for  $^{31}\text{P}$  chemical shift values are reference to 85% phosphoric acid. Chemical shifts are reported in  $\delta$  ppm. Magic angle spinning (MAS) NMR spectra were recorded on a Bruker ESL-400 spectrometer, operating at 161.9 MHz for  $^{31}\text{P}$  NMR. Elemental analysis was performed at the Instrumental Analysis Division, Equipment Management Center, Creative Research Institution, Hokkaido University. High-resolution mass spectra were recorded on a Thermo Fisher Scientific Exactive, JEOL JMS-T100LP mass spectrometer or JEOL JMS-T100 GC mass spectrometer at the Instrumental Analysis Division, Equipment Management Center, Creative Research Institution, Hokkaido University. IR spectrum was recorded on a JASCO FT/IR-4100 spectrophotometer. TLC analyses were performed on commercial glass plates bearing 0.25-mm layer of Merck Silica gel

60F<sub>254</sub>. Silica gel (Kanto Chemical Co., Silica gel 60 N, spherical, neutral) was used for column chromatography. Gel permeation chromatography (GPC) was performed by LC-908 (Japan Analytical Industry Ltd., two in-line JAIGEL-2H, CHCl<sub>3</sub>, 3.5 mL/min, UV and RI detectors). GLC analyses were conducted on a Shimadzu GC-14B equipped with a flame ionization detector. Melting points were determined on a micro melting point apparatus (Yanaco: MP-500D) using micro cover glass.

All reactions were carried out under nitrogen atmosphere. Materials were obtained from commercial suppliers or prepared according to standard procedures unless otherwise noted. [Rh(OH)(cod)]<sub>2</sub> and [Ir(OMe)(cod)]<sub>2</sub> were prepared according to the reported procedure.<sup>1</sup> [Rh(OMe)(cod)]<sub>2</sub> was purchased from Aldrich Co., Ltd. Silica-SMAP was prepared with CARiACT Q-10<sup>®</sup> according to the reported procedure.<sup>2</sup> CARiACT Q-10 was dehydrated by heating at 120 °C for 10 h and stored in a glovebox before use. All solvents for catalytic reactions were degassed via four freeze–pump–thaw cycles before use. 2-Phenylpyridine was purchased from Aldrich Co., Ltd., and purified by distillation with CaH<sub>2</sub> before use. Bis(pinacolato)diboron was purchased from AllyChem Co., Ltd., and recrystallized from pentane before use.

## Preparation of Ligands

**Preparation of 10-Hydroxy-9-phospha-10-silatriptycene (S1).** The reported procedure for the preparation of 10-chloro-9-phospha-10-silatriptycene was modified as follows:<sup>3</sup> the magnesiation of 2-iodobromobenzene (3.4 g, 12.0 mmol) through the Mg/I exchange followed by the reaction with phosphorous trichloride gave tri-(2-bromophenyl)phosphine in 86% yield. The trilithiatoin with <sup>t</sup>BuLi followed by the reaction with tetrachlorosilane gave 10-chloro-9-phospha-10-silatriptycene. After quenching the excess organolithium species with TMSCl, crude material was treated by silica gel column chromatography (hexane/diethyl ether 100:0–80:20), to give **S1** in 83% yield.

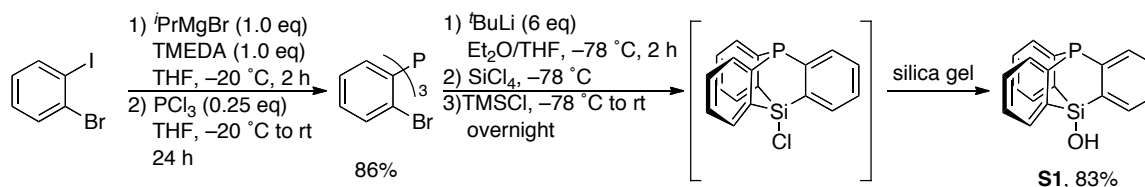

White solid. **M.p.** 320.8 °C, decomp. <sup>1</sup>H NMR (CDCl<sub>3</sub>) δ 3.35 (bs, 1H), 7.19–7.34 (m, 6H), 7.80–7.91 (m, 6H). <sup>13</sup>C NMR (CDCl<sub>3</sub>) δ 127.90 (d, *J* = 1.7 Hz), 128.10 (d, *J* = 15.4 Hz), 131.77, 134.74 (d, *J* = 46.3 Hz), 141.50 (d, *J* = 2.3 Hz), 146.24 (d, *J* = 8.5 Hz). <sup>31</sup>P NMR (CDCl<sub>3</sub>) δ –54.5. IR (CDCl<sub>3</sub>): 3110 (br, SiO–H), 3055, 1573, 1428 cm<sup>–1</sup>. HRMS–EI (*m/z*): [M+H]<sup>+</sup> calcd for C<sub>18</sub>H<sub>14</sub>OPSi, 305.05460; found, 305.0549.

**Preparation of Silica-TRIP.** 10-Hydroxy-9-phospha-10-silatriptycene (**S1**) (0.34 mmol, 109.9 mg), CARIACT Q-10<sup>®</sup> silica gel (3.5 g), imidazole (1.7 mmol, 120.2 mg) and anhydrous, degassed toluene (6 mL) were placed in a 50 mL glass tube containing a magnetic stirring bar. The tube was a screw cap, and suspension was refluxed for 16 h. The mixture was filtered through a cotton, and was washed successively with degassed toluene, degassed MeOH, degassed water, and again with degassed MeOH. Drying in vacuum at 120 °C overnight. The obtained gel was treated with *N*-trimethylsilylimidazole (8.5 ml, excess) at 60 °C for 12 h. A mixture and was filtered through a cotton, and was washed with degassed MeOH. Drying in vacuum at 120 °C overnight gave 3.12 g of Silica-TRIP (loading amount: 0.070 mmol P/g, 64% yield from **S1**).<sup>2a</sup>

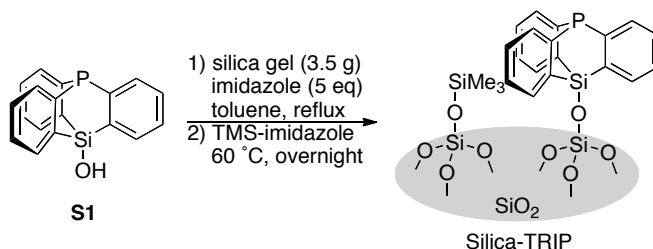

### Preparation of 10-Phenyl-9-phospha-10-silatriptycene (**L1**).

10-Phenyl-9-phospha-10-silatriptycene (**L1**) was synthesized with 248.2 mg (0.5 mmol) of tris(2-bromophenyl)phosphine according to the procedure for the preparation of **S1**, except for using trichlorophenylsilane instead of tetrachlorosilane. A crude material was purified by GPC to give pure **L1** in 49% yield.

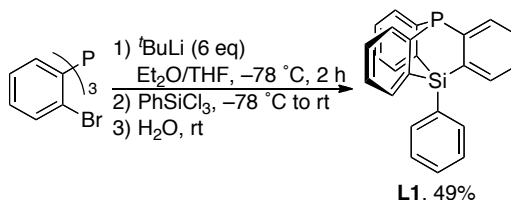

White solid. **M.p.** 244.6–246.3 °C. <sup>1</sup>H NMR (CDCl<sub>3</sub>) δ 7.20–7.28 (m, 6H), 7.70–7.72 (m, 3H), 7.76–7.78 (m, 3H), 7.94–8.00 (m, 3H), 8.26–8.30 (m, 2H). <sup>13</sup>C NMR (CDCl<sub>3</sub>) δ 127.13, 127.84 (d, *J* = 1.7 Hz), 128.05 (d, *J* = 15.4 Hz), 128.94, 131.16, 133.18 (d, *J* = 1.1 Hz), 135.02 (d, *J* = 47.3 Hz), 136.51, 142.16 (d, *J* = 2.8 Hz), 146.81 (d, *J* = 8.0 Hz). <sup>31</sup>P NMR (C<sub>6</sub>D<sub>6</sub>) δ –44.51. **HRMS–ESI** (*m/z*): [M+H]<sup>+</sup> calcd for C<sub>24</sub>H<sub>18</sub>PSi, 365.09099; found, 365.09119.

**Preparation of Silica-TPP.** [4-(Ethoxydimethylsilyl)phenyl]diphenylphosphine (**S2**) was prepared according to reported procedure.<sup>4</sup> **S2** (0.34 mmol, 129.8 mg), silica gel (3.0 g), imidazole (1.7 mmol, 120.2 mg), and anhydrous, degassed toluene (12 mL) were placed in a 50 mL glass tube containing a magnetic stirring bar, and the tube was sealed with a screw cap. The suspension was refluxed for 16 h. A mixture was filtered through a cotton, and was washed successively with degassed toluene, degassed MeOH, degassed water, and again with degassed MeOH. After drying in vacuum at 120°C overnight, the gel was treated with *N*-trimethylsilylimidazole (8.5 ml, excess)

at 60°C for 12 h, and was filtered through a cotton and washed with degassed MeOH. Drying in vacuum at 120°C overnight gave 3.1 g of Silica-TPP (loading amount: 0.053 mmol P/g, 47% yield from S.M.).<sup>2a</sup>

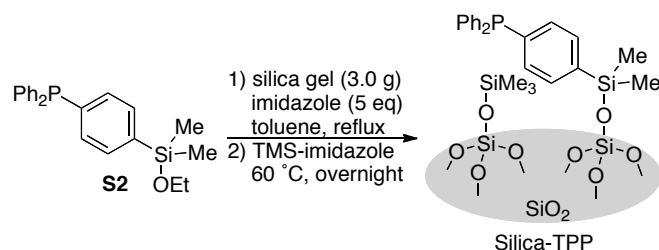

## Experimental Procedures for Borylation

**Typical Procedure for the Borylation of 2-Phenylpyridine (**1a**) with Immobilized Ligand (Figure 1, with Silica-SMAP).** In a glove box, Silica-SMAP (0.069 mmol/g, 0.0025 mmol, 0.5 mol%), bis(pinacolato)diboron (**2**) (127.0 mg, 0.50 mmol), dibenzyl (50 mg, as internal standard) and anhydrous, degassed THF (0.72 mL) were placed in a 10 mL glass tube containing a magnetic stirring bar. A solution of [Rh(OH)(cod)]<sub>2</sub> (0.58 mg, 0.00125 mmol, 0.25 mol%) in THF (0.28 mL) and 2-phenylpyridine (**1a**) (155.2 mg, 0.50 mmol) were added. The tube was sealed with a screw cap and was removed from the glovebox. The mixture was stirred at room temperature for 1 h, and filtered through a glass pipet equipped with a cotton filter. Solvent was removed under reduced pressure. The yield of the product was determined by GC (103%). The crude material was purified by Kugelrohr distillation to give the corresponding arylboronate **3a** (131.3 mg, 0.47 mmol) in 93% isolated yield.

**Typical Procedure for the Borylation of 2-Phenylpyridine (1a) with Soluble Ligand (Figure 1, with Ph-SMAP).** In a glove box, bis(pinacolato)diboron (**2**) (127.0 mg, 0.50 mmol), dibenzyl (50 mg, as internal standard) and anhydrous, degassed THF (0.58 mL) were placed in a 10 mL glass tube containing a magnetic stirring bar. A solution of Ph-SMAP (0.55 mg, 0.0025 mmol, 0.5 mol%) in THF (0.14 mL), a solution of [Rh(OH)(cod)]<sub>2</sub> (0.58 mg, 0.00125 mmol, 0.25 mol%) in THF (0.28 mL) and 2-phenylpyridine (**1a**) (155.2 mg, 0.50 mmol) were added in this order. The tube was sealed with a screw cap and was removed from the glovebox. The mixture was stirred at room temperature for 1 h. Solvent was removed under reduced pressure. The yield of the product was determined by GC (17%).

**Typical Procedure for the Borylation of Functionalized Arenes (Table 1, entry 1).** In a glove box, Silica-SMAP (0.069 mmol/g, 0.0025 mmol, 0.5 mol%), bis(pinacolato)diboron (**2**) (127.0 mg, 0.50 mmol) and anhydrous, degassed THF (0.72 mL) were placed in a 10 mL glass tube containing



a magnetic stirring bar. A solution of  $[\text{Rh}(\text{OH})(\text{cod})]_2$  (0.58 mg, 0.00125 mmol, 0.25 mol%) in THF (0.28 mL) and 2-(3-methylphenyl)pyridine (**1b**) (169.2 mg, 0.50 mmol) were added. The tube was sealed with a screw cap and was removed from the glove box. The mixture was stirred at room temperature for 8 h, and filtered through a glass pipet equipped with a cotton filter. Solvent was removed under reduced pressure. An internal standard (1,1,2,2-tetrachloroethane) was added to the residue. The yield of the product was determined by  $^1\text{H}$  NMR (95%, C6'/C2'=46:1). The crude material was then purified by Kugelrohr distillation to give the corresponding arylboronate **3b** (110.1 mg, 0.37 mmol in 75% isolated yield).

## Metal Screening for the Borylation

In preliminary research, the screening of various transition metal catalyst was performed in the reaction of borylation of benzo[*h*]quinoline (**1f**) with  $\text{PCy}_3$  (Table S1).

**Table S1.** Metal Screening for Various Metal-Catalyzed Borylation of Benzo[*h*]quinoline (**1f**).

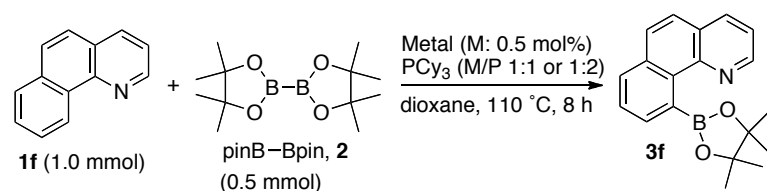

| Entry | Metal precursor                                       | [M]/[L] | GC conv.<br>(%) | NMR yield<br>(%) |
|-------|-------------------------------------------------------|---------|-----------------|------------------|
| 1     | $[\text{PtCl}_2(\text{H}_2\text{C}=\text{CH}_2)_2]_2$ | 1:1     | 17              | 18               |
| 2     | $[\text{PtCl}_2(\text{H}_2\text{C}=\text{CH}_2)_2]_2$ | 1:2     | 0               | 0                |
| 3     | $\text{Pd}(\text{OAc})_2$                             | 1:1     | 0               | 0                |
| 4     | $\text{Pd}(\text{OAc})_2$                             | 1:2     | 0               | 0                |
| 5     | $[\text{Ir}(\text{OMe})(\text{cod})]_2$               | 1:1     | 74              | 0*               |
| 6     | $[\text{Ir}(\text{OMe})(\text{cod})]_2$               | 1:2     | 15              | 13               |
| 7     | $[\text{Rh}(\text{OMe})(\text{cod})]_2$               | 1:1     | 100             | 99               |
| 8     | $[\text{Rh}(\text{OMe})(\text{cod})]_2$               | 1:2     | 99              | 99               |

\*The borylation afforded unidentified isomer.

## Ligand Effects (Table S2).

**Table S2.** Rh-catalyzed Borylation of Various Substrates with Silica-SMAP or PCy<sub>3</sub> Ligands or with Ligand-Free systems.<sup>a</sup>

| Entry | Substrate                                                                                 | Product                                                                                   | Ligand           | P/Rh | Temp.<br>(°C) | Time<br>(h) | NMR yield<br>(%) |
|-------|-------------------------------------------------------------------------------------------|-------------------------------------------------------------------------------------------|------------------|------|---------------|-------------|------------------|
| 1     | 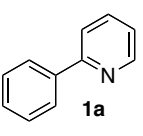<br>1a   | <br>3a   | Silica-SMAP      | 1    | rt            | 1           | 103 <sup>b</sup> |
| 2     |                                                                                           |                                                                                           | PCy <sub>3</sub> | 1    | rt            | 1           | 35 <sup>b</sup>  |
| 3     |                                                                                           |                                                                                           | PCy <sub>3</sub> | 2    | rt            | 1           | 6 <sup>b</sup>   |
| 4     |                                                                                           |                                                                                           | None             | -    | rt            | 1           | 10 <sup>b</sup>  |
| 5     |                                                                                           |                                                                                           | None             | -    | rt            | 12          | 106 <sup>b</sup> |
| 6     | <br>1k   | <br>3k   | Silica-SMAP      | 1    | rt            | 2           | 108              |
| 7     |                                                                                           |                                                                                           | PCy <sub>3</sub> | 1    | rt            | 2           | trace            |
| 8     |                                                                                           |                                                                                           | PCy <sub>3</sub> | 2    | rt            | 2           | trace            |
| 9     |                                                                                           |                                                                                           | PCy <sub>3</sub> | 1    | 60            | 17          | 16               |
| 10    |                                                                                           |                                                                                           | PCy <sub>3</sub> | 2    | 60            | 17          | 5                |
| 11    |                                                                                           |                                                                                           | None             | -    | 60            | 17          | trace            |
| 12    | <br>1n  | <br>3n  | Silica-SMAP      | 1    | 40            | 6           | 99               |
| 13    |                                                                                           |                                                                                           | PCy <sub>3</sub> | 1    | 60            | 14          | 3                |
| 14    |                                                                                           |                                                                                           | PCy <sub>3</sub> | 2    | 60            | 14          | 6                |
| 15    |                                                                                           |                                                                                           | None             | -    | 60            | 14          | 2                |
| 16    | <br>1p | <br>3p | Silica-SMAP      | 1    | 40            | 0.5         | 92               |
| 17    |                                                                                           |                                                                                           | PCy <sub>3</sub> | 1    | 60            | 13          | 9                |
| 19    |                                                                                           |                                                                                           | PCy <sub>3</sub> | 2    | 60            | 13          | 1                |
| 15    |                                                                                           |                                                                                           | None             | -    | 60            | 13          | 56               |

<sup>a</sup> Conditions: **1** (1.0 mmol), **2** (0.5 mmol), [Rh(OH)(cod)]<sub>2</sub> (Rh: 0.0025 mmol), ligand (P: 0.0025 mmol or 0.0050 mmol), THF (1.0 mL). <sup>b</sup> GC yield.

## Complementary Use of the Silica-SMAP–Rh and Silica-SMAP–Ir systems

**Scheme S1.** The Another Example of Complementary Borylation; The Borylation of 3-Acetylphenyl Diethylcarbamate Derivatives with Silica-TRIP–Rh and Silica-SMAP–Ir systems.

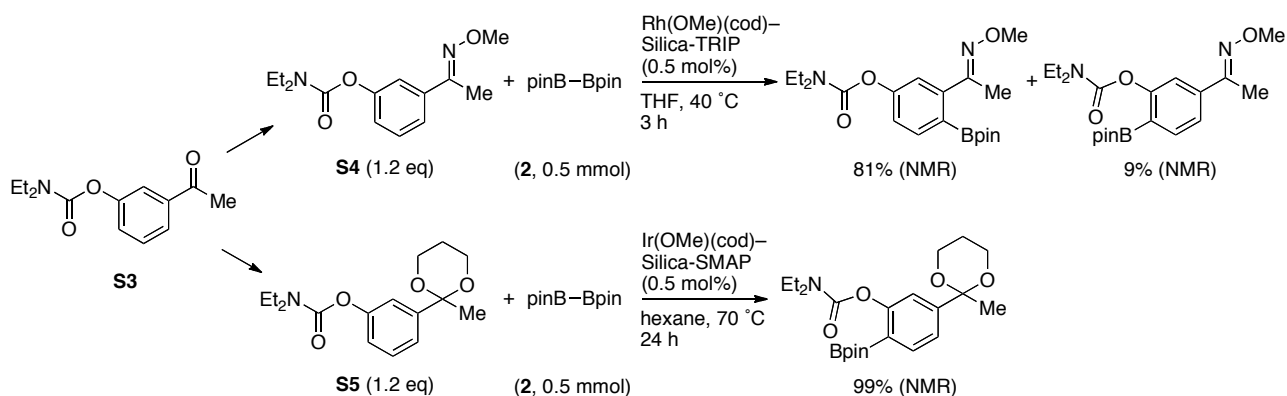

**Table S3.** Limitations of Complementary *N*- or *O*-Directed Borylation of Arenes.

| $  \begin{array}{c}  \text{O-DG} \text{---} \text{C}_6\text{H}_4 \text{---} \text{N-DG} \\  \text{(Ar, 1 or 2 eq)}  \end{array}  + \text{pinB-Bpin} \xrightarrow[\text{conditions}]{\text{Rh or Ir (0.5 mol\%)}, \text{Silica-SMAP (0.5 mol\%)}}  \begin{array}{c}  \text{O-DG} \text{---} \text{C}_6\text{H}_3 \text{---} \text{N-DG} \\  \text{Bpin}  \end{array}  $<br>(2, 0.5 mmol) |                                                                                                  |                                                                  |                                                                                                                                                                                                                                   |
|-----------------------------------------------------------------------------------------------------------------------------------------------------------------------------------------------------------------------------------------------------------------------------------------------------------------------------------------------------------------------------------------|--------------------------------------------------------------------------------------------------|------------------------------------------------------------------|-----------------------------------------------------------------------------------------------------------------------------------------------------------------------------------------------------------------------------------|
| Entry                                                                                                                                                                                                                                                                                                                                                                                   | Substrate                                                                                        | Conditions                                                       | Products (NMR yield)                                                                                                                                                                                                              |
| 1                                                                                                                                                                                                                                                                                                                                                                                       | 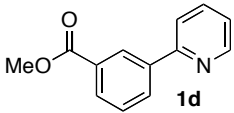<br><b>1d</b>   | [Rh(OH)(cod)] <sub>2</sub><br>THF, 40 °C, 2 h<br>Ar = 1.0 eq     | <br><b>3d</b><br>>99%                                                                                                                           |
| 2                                                                                                                                                                                                                                                                                                                                                                                       | <br><b>1d</b>   | [Ir(OMe)(cod)] <sub>2</sub><br>hexane, 40 °C 15 h<br>Ar = 1.0 eq | <br><b>3d</b><br>trace           + <br><b>3d'</b><br>trace   |
| 3                                                                                                                                                                                                                                                                                                                                                                                       | <br><b>1t</b>  | [Rh(OH)(cod)] <sub>2</sub><br>THF, 40 °C, 13 h<br>Ar = 2.0 eq    | <br><b>3t</b><br>83%                                                                                                                           |
| 4                                                                                                                                                                                                                                                                                                                                                                                       | <br><b>1t</b> | [Ir(OMe)(cod)] <sub>2</sub><br>hexane, 60 °C, 4 h<br>Ar = 2.0 eq | N.R.                                                                                                                                                                                                                              |
| 5                                                                                                                                                                                                                                                                                                                                                                                       | <br><b>1v</b> | [Rh(OH)(cod)] <sub>2</sub><br>THF, 40 °C, 3 h<br>Ar = 1.0 eq     | <br><b>3v</b><br>N.D.           + <br><b>3v'</b><br>91%  |
| 6                                                                                                                                                                                                                                                                                                                                                                                       | <br><b>1v</b> | [Ir(OMe)(cod)] <sub>2</sub><br>hexane, 60 °C 1 h<br>Ar = 1.0 eq  | <br><b>3v</b><br>N.D.           + <br><b>3v'</b><br>>99% |

With the Silica-SMAP–Rh system, the borylation of **1d** and **1t** occurred at the position *ortho* to the nitrogen-based directing group (Table S3, entries 1 and 3). However, the Silica-SMAP–Ir system was not applicable to the borylation of these substrate (entries 2 and 4). The reaction might be inhibited by the strong coordination ability of the nitrogen-based substitution. On the other hands, the borylation of methyl 3-(3,5-dimethylpyrazolyl)methylbenzoate (**1v**) occurred cleanly at the position *ortho* to the ester group irrespective of using the Rh or Ir catalyst systems (entries 5 and 6).

## Preparation of Substrates

The starting materials **1a**, **1f** and **1k** are known compounds. The starting materials **1b**<sup>5</sup>, **1c**<sup>6</sup>, **1d**<sup>7</sup>, **1g**<sup>8</sup>, **1h**<sup>9</sup>, **1i**<sup>10</sup>, **1j**<sup>11</sup>, **1l**<sup>12</sup>, **1m**<sup>13</sup>, **1n**<sup>14</sup>, **1p**<sup>15</sup>, **1q**<sup>16</sup>, **1r**<sup>17</sup>, **1s**<sup>18</sup> and **1u**<sup>19</sup> shown in Tables 1 and 2 are known compounds.

**Preparation of 2-(3,5-Dimethylphenyl)pyridine (1e).** 2-(3,5-Dimethylphenyl)pyridine (**1e**) was synthesized by the Suzuki-Miyaura coupling reaction of 3,5-dimethylphenylboronic acid (900 mg. 6.0 mmol) with 2-bromopyridine (790 mg. 5.0 mmol) according to the reported procedure.<sup>20</sup> Purification by silica gel column chromatography (hexane/diethyl ether = 100:0–90:10) gave pure **1e** in 96% yield.

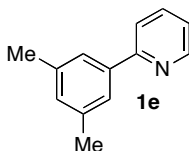

Colorless oil. <sup>1</sup>H NMR (CDCl<sub>3</sub>) δ 2.40 (s, 6H), 7.07 (s, 1H), 7.22 (m, 1H), 7.60 (s, 2H), 7.70–7.77 (m, 2H), 8.69 (d, *J* = 4.5 Hz, 1H). <sup>13</sup>C NMR (CDCl<sub>3</sub>) δ 21.26, 120.70, 121.97, 124.80, 130.67, 136.72, 138.35, 139.42, 149.63, 157.86. **Anal.** Calcd for C<sub>13</sub>H<sub>13</sub>N: C, 85.21%; H, 7.15%; N, 7.64%. Found: C, 85.16%; H, 7.23%; N, 7.47%.

**Preparation of 1-(3-Methylbenzyl)pyrrolidine (1o).** 1-(3-Methylbenzyl)pyrrolidine (**1o**) was synthesized by of 1-(bromomethyl)-3-methylbenzene (3.7 g. 20.0 mmol) with pyrrolidine (1.8 g. 25.0 mmol) according to the reported procedure.<sup>21</sup> Purification by silica gel column chromatography (hexane/diethyl ether = 100:0–90:20) gave pure **1o** in 31% yield.

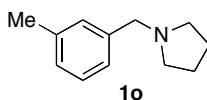

Colorless oil. <sup>1</sup>H NMR (CDCl<sub>3</sub>) δ 1.79 (quin, *J* = 3.3 Hz, 4H), 2.34 (s, 3H), 2.48–2.53 (m, 4H), 3.58 (s, 2H), 7.06 (d, *J* = 7.5 Hz, 1H), 7.12 (d, *J* = 7.5 Hz, 1H), 7.16 (s, 1H), 7.20 (d, *J* = 7.5 Hz, 1H). <sup>13</sup>C NMR (CDCl<sub>3</sub>) δ 21.28, 23.28, 54.17, 60.75, 126.04, 127.67, 128.14, 129.73, 137.91, 139.35. **HRMS–ESI** (*m/z*): [M+H]<sup>+</sup> Calcd for C<sub>12</sub>H<sub>18</sub>N, 176.14338; found, 176.14352.

**Preparation of Methyl 4-(1,3-Dimethylimidazolidin-2-yl)benzoate (1t).** Methyl 4-(1,3-dimethylimidazolidin-2-yl)benzoate (**1t**) was prepared by the protection of methyl 4-formylbenzoate (2.5 g. 15.0 mmol) with *N,N'*-dimethylethylenediamine (1.5 g. 16.5 mmol) according to the reported procedure.<sup>22</sup> The obtained crude material was purified by kugelrohr distillation to give pure **1t** in 74% yield.

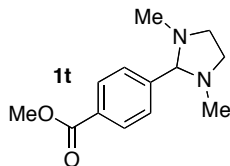

Pale yellow solid. **M.p.** 35.9–36.3 °C. **<sup>1</sup>H NMR** (CDCl<sub>3</sub>) δ 2.18 (s, 6H), 2.56–2.62 (m, 2H), 3.33 (s, 1H), 3.39–3.45 (m, 2H), 3.92 (s, 3H), 7.53 (d, *J* = 8.1 Hz, 2H), 8.04 (d, *J* = 8.1 Hz, 2H). **<sup>13</sup>C NMR** (CDCl<sub>3</sub>) δ 39.33, 51.97, 53.32, 91.81, 128.92, 129.65, 130.40, 145.42, 167.14. **Anal.** Calcd for C<sub>13</sub>H<sub>18</sub>N<sub>2</sub>O<sub>2</sub>: C, 66.64%; H, 7.74%; N, 11.96%. Found: C, 66.71%; H, 7.91%; N, 11.81%.

## Characterization of Borylation Products

### 2-[2-(4,4,5,5-Tetramethyl-1,3,2-dioxaborolan-2-yl)phenyl]pyridine (3a)

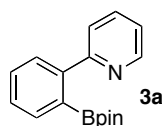

White solid. **M.p.** 136.3–138.3 °C. **<sup>1</sup>H NMR** (CDCl<sub>3</sub>) δ 1.43 (s, 12H), 7.27–7.44 (m, 3H), 7.66 (d, *J* = 7.8 Hz, 1H), 7.73 (d, *J* = 6.9 Hz, 1H), 7.81 (d, *J* = 8.1 Hz, 1H), 7.97 (td, *J* = 7.8, 1.5 Hz, 1H), 8.68 (d, *J* = 5.4 Hz, 1H). **<sup>13</sup>C NMR** (CDCl<sub>3</sub>) δ 26.87, 80.12, 117.42, 121.20, 122.73, 127.84, 131.45, 131.51, 137.13, 141.93, 142.12, 156.59. A signal for the carbon directly attached to the boron atom was not observed. **HRMS–ESI** (*m/z*): [M+Na]<sup>+</sup> Calcd for C<sub>17</sub>H<sub>20</sub>N<sup>10</sup>BO<sub>2</sub>Na, 303.15156; found, 303.15125.

### 2-[5-Methyl-2-(4,4,5,5-tetramethyl-1,3,2-dioxaborolan-2-yl)phenyl]pyridine (3b)

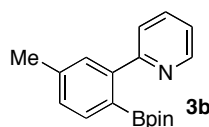

White solid. **M.p.** 147.7–149.1 °C. **<sup>1</sup>H NMR** (CDCl<sub>3</sub>) δ 1.41 (s, 12H), 2.37 (s, 3H), 6.87 (d, *J* = 7.2 Hz, 1H), 7.34 (d, *J* = 5.4 Hz, 1H), 7.46 (s, 1H), 7.66 (d, *J* = 7.5 Hz, 1H), 7.77 (d, *J* = 7.5 Hz, 1H), 7.94 (td, *J* = 7.5, 1.5 Hz, 1H), 8.65 (d, *J* = 5.4 Hz, 1H). **<sup>13</sup>C NMR** (CDCl<sub>3</sub>) δ 21.23, 26.78, 80.04, 117.30, 121.82, 122.55, 131.32, 132.47, 137.38, 137.46, 141.75, 143.24, 156.75. A signal for the carbon directly attached to the boron atom was not observed. **HRMS–ESI** (*m/z*): [M+H]<sup>+</sup> Calcd for C<sub>18</sub>H<sub>23</sub>N<sup>10</sup>BO<sub>2</sub>, 295.18527; found, 295.18495.

### 2-[5-Methoxy-2-(4,4,5,5-tetramethyl-1,3,2-dioxaborolan-2-yl)phenyl]pyridine (3c)

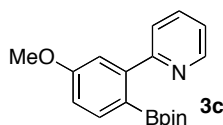

White solid. **M.p.** 130.6–131.6 °C. **<sup>1</sup>H NMR** (CDCl<sub>3</sub>) δ 1.41 (s, 12H), 3.85 (s, 3H), 6.99 (dd *J* = 8.1, 2.1 Hz, 1H), 7.17 (d, *J* = 2.1 Hz, 1H), 7.36 (tm, *J* = 5.7 Hz, 1H), 7.62 (d, *J* = 8.1 Hz, 1H), 7.75 (d, *J* = 7.8 Hz, 1H), 7.95 (td, *J* = 7.8, 1.5 Hz, 1H), 8.66 (d, *J* = 5.7 Hz, 1H). **<sup>13</sup>C NMR** (CDCl<sub>3</sub>) δ 26.68, 55.22, 80.04, 106.83, 117.15, 117.45, 122.78, 132.46, 138.69, 141.75, 143.23, 156.13, 159.97. A signal for the carbon directly attached to the boron atom was not observed. **HRMS–ESI** (*m/z*): [M+Na]<sup>+</sup> Calcd for C<sub>18</sub>H<sub>22</sub>N<sup>10</sup>BO<sub>3</sub>Na, 333.16213; found, 333.16223.

**2-[5-Methoxycarbonyl-2-(4,4,5,5-tetramethyl-1,3,2-dioxaborolan-2-yl)phenyl]pyridine (3d)**

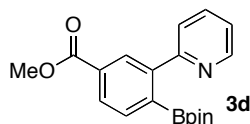

White solid. **M.p.** 173.8–174.2 °C. **<sup>1</sup>H NMR** (CDCl<sub>3</sub>) δ 1.44 (s, 12H), 3.95 (s, 3H), 7.45 (tm *J* = 5.7 Hz, 1H), 7.81 (d, *J* = 7.5 Hz, 1H), 7.93 (d, *J* = 7.9 Hz, 1H), 8.01–8.10 (m, 2H), 8.35 (s, 1H), 8.70 (d, *J* = 5.7 Hz, 1H). **<sup>13</sup>C NMR** (CDCl<sub>3</sub>) δ 26.90, 52.10, 80.40, 117.90, 122.31, 123.44, 129.90, 131.55, 132.40, 137.51, 142.38, 143.33, 155.58, 167.27. A signal for the carbon directly attached to the boron atom was not observed. **HRMS–ESI** (*m/z*): [M+Na]<sup>+</sup> Calcd for C<sub>19</sub>H<sub>22</sub>N<sup>10</sup>BO<sub>4</sub>Na, 361.15704; found, 361.15724.

**2-[3,5-Dimethyl-2-(4,4,5,5-tetramethyl-1,3,2-dioxaborolan-2-yl)phenyl]pyridine (3e)**

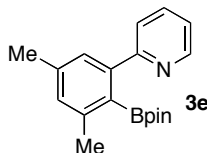

White solid. **M.p.** 147.1–147.9 °C. **<sup>1</sup>H NMR** (CDCl<sub>3</sub>) δ 1.46 (s, 12H), 2.32 (s, 3H), 2.53 (s, 3H), 7.00 (s, 1H), 7.28–7.31 (m, 2H), 7.75 (d, *J* = 7.8 Hz, 1H), 7.86 (td, *J* = 7.8, 1.2 Hz, 1H), 8.60 (d, *J* = 5.4 Hz, 1H). **<sup>13</sup>C NMR** (CDCl<sub>3</sub>) δ 20.93, 21.90, 28.16, 81.04, 117.69, 120.01, 122.26, 133.43, 137.69, 138.57, 140.40, 141.88, 143.25, 156.50. A signal for the carbon directly attached to the boron atom was not observed. **HRMS–ESI** (*m/z*): [M+H]<sup>+</sup> Calcd for C<sub>19</sub>H<sub>25</sub>N<sup>10</sup>BO<sub>2</sub>, 309.20092; found, 309.20054.

**10-(4,4,5,5-Tetramethyl-1,3,2-dioxaborolan-2-yl)benzo[*h*]quinoline (3f)**

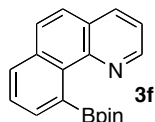

White solid. **M.p.** 171.2–172.8 °C. **<sup>1</sup>H NMR** (CDCl<sub>3</sub>) δ 1.55 (s, 12H), 7.52 (dd, *J* = 7.8, 4.5 Hz, 1H), 7.65–7.72 (m, 2H), 7.77 (dd, *J* = 6.9, 1.5 Hz, 1H), 7.81 (d, *J* = 8.7 Hz, 1H), 7.88 (dd, *J* = 7.5, 1.5 Hz, 1H), 8.19 (dd, *J* = 7.8, 1.5 Hz, 1H), 8.90 (dd, *J* = 4.5, 1.5 Hz, 1H). **<sup>13</sup>C NMR** (CDCl<sub>3</sub>) δ 25.10, 83.10, 121.66, 124.42, 126.12, 127.80, 128.02, 128.12, 130.69, 132.53, 134.26, 135.95,

146.29, 146.57. A signal for the carbon directly attached to the boron atom was not observed. **HRMS–ESI** ( $m/z$ ):  $[M]^+$  Calcd for  $C_{19}H_{20}N^{10}BO_2$ , 304.16234; found, 304.16165.

**1-Methyl-2-[2-(4,4,5,5-tetramethyl-1,3,2-dioxaborolan-2-yl)phenyl]-1H-imidazole (3g)**

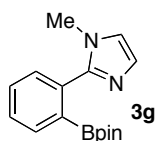

White solid. **M.p.** 150.0–150.3 °C.  **$^1H$  NMR** ( $CDCl_3$ )  $\delta$  1.33 (s, 12H), 3.85 (s, 3H), 6.84 (d,  $J$  = 1.5 Hz, 1H), 7.13 (d,  $J$  = 1.5 Hz, 1H), 7.28 (m, 1H), 7.36 (td,  $J$  = 7.2, 1.2 Hz, 1H), 7.43 (d,  $J$  = 7.2 Hz, 1H), 7.71 (d,  $J$  = 6.9 Hz, 1H).  **$^{13}C$  NMR** ( $CDCl_3$ )  $\delta$  25.53, 34.41, 80.34, 121.17, 121.20, 122.43, 123.00, 127.63, 129.87, 131.28, 132.14. A signal for the carbon directly attached to the boron atom was not observed. **HRMS–FD** ( $m/z$ ):  $[M]^+$  Calcd for  $C_{16}H_{21}N_2^{11}BO_2$ , 284.16961; found, 284.16952.

**N-(1-Hydroxy-2-methylpropan-2-yl)-2-(4,4,5,5-tetramethyl-1,3,2-dioxaborolan-2-yl)benzamide (3h')**

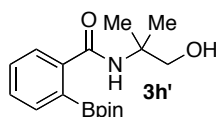

White solid. **M.p.** 152.1–153.1 °C.  **$^1H$  NMR** ( $CDCl_3$ )  $\delta$  1.38 (s, 12H), 1.40 (s, 6H), 3.78 (d,  $J$  = 6.9 Hz, 2H), 4.34 (bt,  $J$  = 6.9 Hz, 1H), 6.02 (bs, 1H), 7.37–7.48 (m, 3H), 7.69 (d,  $J$  = 6.6 Hz, 1H).  **$^{13}C$  NMR** ( $CDCl_3$ )  $\delta$  24.35, 24.69, 56.80, 68.44, 83.12, 123.88, 129.17, 131.02, 133.18, 138.65, 170.79. A signal for the carbon directly attached to the boron atom was not observed. **HRMS–ESI** ( $m/z$ ):  $[M+Na]^+$  Calcd for  $C_{17}H_{26}N^{10}BO_4Na$ , 341.18834; found, 341.18815

**1-[2-(4,4,5,5-Tetramethyl-1,3,2-dioxaborolan-2-yl)phenyl]-1H-pyrazole (3i)**

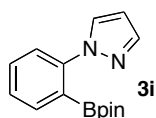

White solid. **M.p.** 46.3–47.3 °C.  **$^1H$  NMR** ( $CDCl_3$ )  $\delta$  1.36 (s, 12H), 6.45 (t,  $J$  = 2.1 Hz, 1H), 7.30 (dd,  $J$  = 6.9, 1.5 Hz, 1H), 7.37–7.44 (m, 2H), 7.59 (d,  $J$  = 6.3 Hz, 1H), 7.66 (d,  $J$  = 2.1 Hz, 1H), 7.87 (d,  $J$  = 2.1 Hz, 1H).  **$^{13}C$  NMR** ( $CDCl_3$ )  $\delta$  24.67, 83.32, 107.65, 117.53, 126.33, 126.37, 129.93, 133.79, 138.98, 142.67. A signal for the carbon directly attached to the boron atom was not observed. **HRMS–ESI** ( $m/z$ ):  $[M+Na]^+$  Calcd for  $C_{15}H_{19}N_2^{10}BO_2Na$ , 292.14681; found, 292.14664.

**3,5-Dimethyl-1-[2-(4,4,5,5-tetramethyl-1,3,2-dioxaborolan-2-yl)phenyl]-1H-pyrazole (3j)**

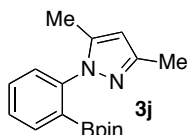

Colorless oil.  $^1\text{H NMR}$  ( $\text{CDCl}_3$ )  $\delta$  1.22 (s, 12H), 2.19 (s, 3H), 2.27 (s, 3H), 5.93 (s, 1H), 7.27 (m, 1H), 7.37 (td,  $J = 7.5, 1.2$  Hz, 1H), 7.47 (td,  $J = 7.8, 1.5$  Hz, 1H), 7.74 (dd,  $J = 7.5, 1.2$  Hz, 1H).  $^{13}\text{C NMR}$  ( $\text{CDCl}_3$ )  $\delta$  11.75, 13.28, 24.53, 83.37, 105.61, 125.49, 127.32, 130.50, 134.90, 139.89, 143.31, 147.70. A signal for the carbon directly attached to the boron atom was not observed. **HRMS–ESI** ( $m/z$ ):  $[\text{M}+\text{Na}]^+$  Calcd for  $\text{C}_{17}\text{H}_{23}\text{N}_2^{10}\text{BO}_2\text{Na}$ , 320.17811; found, 320.17809.

**2-[2-(4,4,5,5-Tetramethyl-1,3,2-dioxaborolan-2-yl)benzyl]pyridine (3k)**

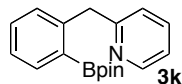

White solid. **M.p.** 125.7–127.0 °C.  $^1\text{H NMR}$  ( $\text{CDCl}_3$ )  $\delta$  1.25 (s, 12H), 4.34 (s, 2H), 7.12–7.29 (m, 3H), 7.39 (t,  $J = 6.6$  Hz, 1H), 7.48 (d,  $J = 7.5$  Hz, 1H), 7.70 (d,  $J = 6.6$  Hz, 1H), 7.83 (td,  $J = 7.5, 1.5$  Hz, 1H), 9.11 (d,  $J = 4.8$  Hz, 1H).  $^{13}\text{C NMR}$  ( $\text{CDCl}_3$ )  $\delta$  25.89, 39.68, 80.76, 122.02, 125.20, 126.11, 126.54, 126.82, 130.93, 138.99, 139.72, 143.70, 158.76. A signal for the carbon directly attached to the boron atom was not observed. **HRMS–ESI** ( $m/z$ ):  $[\text{M}+\text{H}]^+$  Calcd for  $\text{C}_{18}\text{H}_{23}\text{N}^{10}\text{BO}_2$ , 295.18527; found, 295.18491.

**1-[5-Methyl-2-(4,4,5,5-tetramethyl-1,3,2-dioxaborolan-2-yl)benzyl]-1H-pyrazole (3l)**

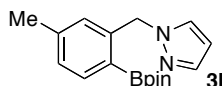

Colorless oil.  $^1\text{H NMR}$  ( $\text{CDCl}_3$ )  $\delta$  1.33 (s, 12H), 2.29 (s, 3H), 5.63 (s, 2H), 6.24 (t,  $J = 1.8$  Hz, 1H), 6.88 (s, 1H), 7.10 (d,  $J = 7.8$  Hz, 1H), 7.45 (d,  $J = 1.8$  Hz, 1H), 7.55 (d,  $J = 1.8$  Hz, 1H), 7.76 (d,  $J = 7.8$  Hz, 1H).  $^{13}\text{C NMR}$  ( $\text{CDCl}_3$ )  $\delta$  21.43, 24.69, 54.89, 83.59, 105.29, 127.92, 129.11, 129.55, 136.46, 139.06, 141.79, 143.04. A signal for the carbon directly attached to the boron atom was not observed. **HRMS–ESI** ( $m/z$ ):  $[\text{M}+\text{H}]^+$  Calcd for  $\text{C}_{17}\text{H}_{24}\text{N}_2^{11}\text{BO}_2$ , 299.19254; found, 299.19257.

***N,N*-Dimethyl-1-[5-methyl-2-(4,4,5,5-tetramethyl-1,3,2-dioxaborolan-2-yl)phenyl]methanamine (3m)**

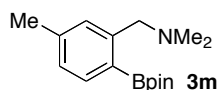

White solid. **M.p.** 86.6–88.8 °C.  $^1\text{H NMR}$  ( $\text{CDCl}_3$ )  $\delta$  1.30 (s, 12H), 2.29 (s, 3H), 2.53 (s, 6H), 3.80 (s, 2H), 6.83 (s, 1H), 7.03 (d,  $J = 7.5$  Hz, 1H), 7.42 (d,  $J = 7.5$  Hz, 1H).  $^{13}\text{C NMR}$  ( $\text{CDCl}_3$ )  $\delta$  21.19, 26.26, 45.51, 65.11, 80.34, 123.92, 128.09, 131.51, 137.12, 140.21. A signal for the carbon directly attached to the boron atom was not observed. **HRMS–ESI** ( $m/z$ ):  $[\text{M}+\text{H}]^+$  Calcd for  $\text{C}_{16}\text{H}_{27}\text{N}^{10}\text{BO}_2$ , 275.21657; found, 275.21715.

***N,N*-Dimethyl-1-[2-(4,4,5,5-tetramethyl-1,3,2-dioxaborolan-2-yl)phenyl]ethanamine (3n)**



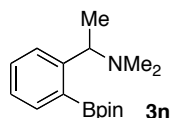

Colorless oil. **<sup>1</sup>H NMR** (CDCl<sub>3</sub>) δ 1.29 (s, 6H), 1.32 (s, 6H), 1.44 (d, *J* = 6.9 Hz, 3H), 2.43 (s, 6H), 4.14 (q, *J* = 6.9 Hz, 1H), 7.01 (m, 1H), 7.16–7.25 (m, 2H), 7.54 (m, 1H). **<sup>13</sup>C NMR** (CDCl<sub>3</sub>) δ 11.87, 26.32, 27.17, 40.44, 65.58, 79.97, 121.64, 127.36 (x2C), 130.63, 144.10. A signal for the carbon directly attached to the boron atom was not observed. **HRMS–ESI** (*m/z*): [M+Na]<sup>+</sup> Calcd for C<sub>16</sub>H<sub>26</sub>N<sup>10</sup>BO<sub>2</sub>Na, 297.19851; found, 297.19907.

**1-[5-Methyl-2-(4,4,5,5-tetramethyl-1,3,2-dioxaborolan-2-yl)benzyl]pyrrolidine hydrochloride salt (3o')**

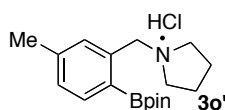

White solid. **M.p.** 197.3–200.3 °C. **<sup>1</sup>H NMR** (CDCl<sub>3</sub>) δ 1.36 (s, 12H), 1.98–2.03 (m, 2H), 2.20–2.23 (m, 2H), 2.42 (s, 3H), 2.86–2.95 (m, 2H), 3.57 (sext, *J* = 5.1 Hz, 2H), 4.59 (d, *J* = 6.0 Hz, 2H), 7.22 (d, *J* = 7.8 Hz, 1H), 7.79 (d, *J* = 7.8 Hz, 1H), 7.90 (s, 1H), 12.28 (bs, 1H). **<sup>13</sup>C NMR** (CDCl<sub>3</sub>) δ 21.38, 23.01, 24.79, 52.34, 55.70, 84.09, 129.80, 132.93, 136.03, 136.90, 143.14. A signal for the carbon directly attached to the boron atom was not observed. **HRMS–ESI** (*m/z*): [M–Cl]<sup>+</sup> Calcd for C<sub>18</sub>H<sub>29</sub>N<sup>10</sup>BO<sub>2</sub>, 301.23222; found, 301.23240.

**1,3-Dimethyl-2-[2-(4,4,5,5-tetramethyl-1,3,2-dioxaborolan-2-yl)phenyl]imidazolidine (3p)**

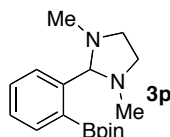

White solid. **M.p.** 107.6–108.3 °C. **<sup>1</sup>H NMR** (CDCl<sub>3</sub>) δ 1.29 (s, 12H), 2.46 (s, 6H), 2.72 (q, *J* = 3.6 Hz, 2H), 3.77 (q, *J* = 3.6 Hz, 2H), 3.87 (s, 1H), 7.09 (d, *J* = 7.5 Hz, 1H), 7.20 (td, *J* = 7.5, 1.5 Hz, 1H), 7.31 (td, *J* = 7.5, 1.2 Hz, 1H), 7.56 (d, *J* = 7.5 Hz, 1H). **<sup>13</sup>C NMR** (CDCl<sub>3</sub>) δ 25.90, 41.58, 53.67, 80.26, 95.18, 124.04, 127.06, 128.92, 131.93, 139.05. A signal for the carbon directly attached to the boron atom was not observed. **HRMS–ESI** (*m/z*): [M+H]<sup>+</sup> Calcd for C<sub>17</sub>H<sub>28</sub>N<sub>2</sub><sup>10</sup>BO<sub>2</sub>, 302.22747; found, 302.22715.

**(E)-2,4,6-Trimethyl-N-{1-[2-(4,4,5,5-tetramethyl-1,3,2-dioxaborolan-2-yl)phenyl]ethylidene}aniline (3q)**

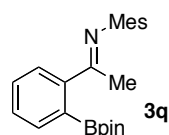

White solid. M.p. 201.2–202.4 °C.  $^1\text{H NMR}$  ( $\text{CDCl}_3$ )  $\delta$  1.02 (s, 12H), 2.19 (s, 9H), 2.32 (s, 3H), 6.92 (s, 2H), 7.30 (d,  $J = 7.2$  Hz, 1H), 7.49–7.56 (m, 2H), 7.68 (d,  $J = 7.2$  Hz, 1H).  $^{13}\text{C NMR}$  ( $\text{CDCl}_3$ )  $\delta$  14.21, 18.21, 20.79, 25.74, 79.92, 123.84, 127.45, 128.86, 130.44, 132.42, 133.37, 136.52, 137.96, 138.43, 177.71. A signal for the carbon directly attached to the boron atom was not observed. **HRMS–ESI** ( $m/z$ ):  $[\text{M}+\text{Na}]^+$  calcd for  $\text{C}_{23}\text{H}_{30}^{11}\text{BNO}_2\text{Na}$ , 385.22981; found, 385.22946.

**(*E*)-1-[2-(4,4,5,5-Tetramethyl-1,3,2-dioxaborolan-2-yl)phenyl]ethanone *O*-Methyloxime (3r)**

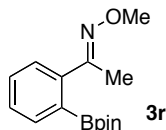

Colorless oil.  $^1\text{H NMR}$  ( $\text{CDCl}_3$ )  $\delta$  1.34 (s, 12H), 2.22 (s, 3H), 3.97 (s, 3H), 7.31–7.44 (m, 3H), 7.69 (dm,  $J = 7.5$  Hz, 1H).  $^{13}\text{C NMR}$  ( $\text{CDCl}_3$ )  $\delta$  16.16, 24.69, 61.57, 83.79, 127.33, 127.90, 130.28, 134.79, 143.07, 158.54. A signal for the carbon directly attached to the boron atom was not observed. **HRMS–ESI** ( $m/z$ ):  $[\text{M}+\text{Na}]^+$  Calcd for  $\text{C}_{15}\text{H}_{22}\text{N}^{10}\text{BO}_3\text{Na}$ , 297.16213; found, 297.16162.

**(*E*)-1-[3-(4,4,5,5-Tetramethyl-1,3,2-dioxaborolan-2-yl)naphthalen-2-yl]ethanone *O*-Methyloxime (3s)**

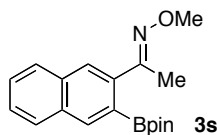

White solid. M.p. 140.6–142.1 °C.  $^1\text{H NMR}$  ( $\text{CDCl}_3$ )  $\delta$  1.39 (s, 12H), 2.30 (s, 3H), 4.01 (s, 3H), 7.47–7.51 (m, 2H), 7.80–7.87 (m, 3H), 8.23 (s, 1H).  $^{13}\text{C NMR}$  ( $\text{CDCl}_3$ )  $\delta$  16.14, 24.71, 61.58, 83.81, 126.42, 126.60, 127.19, 128.01, 128.17, 132.61, 134.03, 136.25, 139.06, 158.36. A signal for the carbon directly attached to the boron atom was not observed. **HRMS–ESI** ( $m/z$ ):  $[\text{M}+\text{Na}]^+$  Calcd for  $\text{C}_{19}\text{H}_{24}^{11}\text{BNO}_3\text{Na}$ , 347.17778; found, 347.17812.

**Methyl 4-(1,3-Dimethylimidazolidin-2-yl)-3-(4,4,5,5-tetramethyl-1,3,2-dioxaborolan-2-yl)benzoate (3t)**

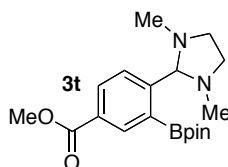

White solid. **M.p.** 98.7–99.8 °C.  $^1\text{H NMR}$  ( $\text{CDCl}_3$ )  $\delta$  1.31 (s, 12H), 2.47 (s, 6H), 2.76 (q,  $J = 4.2$  Hz, 2H), 3.78 (q,  $J = 4.2$  Hz, 2H), 3.89 (s, 3H), 3.91 (s, 1H), 7.17 (d,  $J = 7.8$  Hz, 1H), 7.92 (d,  $J = 7.8$  Hz, 1H), 8.22 (s, 1H).  $^{13}\text{C NMR}$  ( $\text{CDCl}_3$ )  $\delta$  25.90, 41.61, 51.74, 53.76, 80.49, 94.61, 124.06, 128.75, 130.56, 133.45, 144.08, 167.67. A signal for the carbon directly attached to the boron atom

was not observed. **HRMS–ESI** ( $m/z$ ):  $[M+Na]^+$  Calcd for  $C_{19}H_{29}N_2^{10}BO_4Na$ , 382.21489; found, 382.21475.

**Methyl 4-Formyl-3-(4,4,5,5-tetramethyl-1,3,2-dioxaborolan-2-yl)benzoate (4t)**

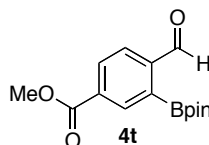

White solid. **M.p.** 108.6–109.5 °C.  **$^1H$  NMR** ( $CDCl_3$ )  $\delta$  1.41 (s, 12H), 3.96 (s, 3H), 8.02 (d,  $J$  = 8.1 Hz, 1H), 8.21 (dd,  $J$  = 8.1, 1.5 Hz, 1H), 8.53 (d,  $J$  = 1.5 Hz, 1H), 10.63 (s, 1H).  **$^{13}C$  NMR** ( $CDCl_3$ )  $\delta$  24.77, 54.43, 84.74, 127.78, 131.86, 133.65, 136.87, 144.22, 166.41, 194.35. A signal for the carbon directly attached to the boron atom was not observed. **HRMS–FD** ( $m/z$ ):  $[M]^+$  Calcd for  $C_{15}H_{19}^{10}BO_5$ , 289.13619; found, 289.13603.

**Methyl 4-(1,3-Dioxan-2-yl)-2-(4,4,5,5-tetramethyl-1,3,2-dioxaborolan-2-yl)benzoate (3u)**

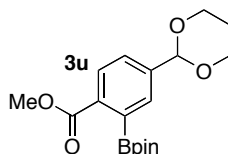

Colorless wax.  **$^1H$  NMR** ( $CDCl_3$ )  $\delta$  1.46 (m, 13H), 2.22 (m, 1H), 3.90 (s, 3H), 3.99 (td,  $J$  = 12.0, 2.4 Hz, 2H), 4.28 (dd,  $J$  = 10.2, 5.1 Hz, 2H), 5.52 (s, 1H), 7.55 (dd,  $J$  = 7.8, 1.8 Hz, 1H), 7.60 (s, 1H), 7.94 (d,  $J$  = 7.8 Hz, 1H).  **$^{13}C$  NMR** ( $CDCl_3$ )  $\delta$  24.79, 25.59, 52.24, 67.35, 84.01, 100.93, 126.68, 128.87, 130.06, 133.83, 142.00, 168.41. A signal for the carbon directly attached to the boron atom was not observed. **HRMS–ESI** ( $m/z$ ):  $[M+Na]^+$  Calcd for  $C_{18}H_{25}^{10}BO_6Na$ , 370.16727; found, 370.16710.

**Methyl 4-Formyl-2-(4,4,5,5-tetramethyl-1,3,2-dioxaborolan-2-yl)benzoate (4u)**

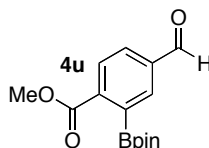

White solid. **M.p.** 102.6–105.5 °C.  **$^1H$  NMR** ( $CDCl_3$ )  $\delta$  1.44 (s, 12H), 3.96 (s, 3H), 7.94 (dd,  $J$  = 8.1, 1.5 Hz, 1H), 8.02 (d,  $J$  = 1.5 Hz, 1H), 8.09 (d,  $J$  = 8.1 Hz, 1H), 10.10 (s, 1H).  **$^{13}C$  NMR** ( $CDCl_3$ )  $\delta$  24.76, 52.72, 84.50, 129.36, 130.07, 133.87, 137.94, 138.63, 167.75, 192.06. A signal for the carbon directly attached to the boron atom was not observed. **HRMS–ESI** ( $m/z$ ):  $[M+H]^+$  Calcd for  $C_{15}H_{20}^{10}BO_5$ , 290.14346; found, 290.14368.

**References**

- (1) Uson, R.; Oro, L. A.; Cabeza, J. A. *Inorg. Synth.* **1985**, *23*, 126.
- (2) (a) Hamasaka, G.; Ochida, A.; Hara, K.; Sawamura, M. *Angew. Chem., Int. Ed.* **2007**, *46*, 5381–5383. (b) Hamasaka, G.; Kawamorita, S.; Ochida, A.; Akiyama, R.; Hara, K.; Fukuoka, A.; Asakura, K.; Chun, W. J.; Ohmiya, H.; Sawamura, M. *Organometallics* **2008**, *27*, 6495–6506. (c) Kawamorita, S.; Ohmiya, H.; Hara, K.; Fukuoka, A.; Sawamura, M. *J. Am. Chem. Soc.* **2009**, *131*, 5058–5059.
- (3) Tsuji, H.; Inoue, T.; Kaneta, Y.; Sase, S.; Kawachi, A.; Tamao, K. *Organometallics* **2006**, *25*, 6142–6148.
- (4) Takuma, Y.; Imaki, N. *J. Organomet. Chem.* **1989**, *379*, 27–32.
- (5) Li, M.; Hua, R. *Tetrahedron Letters* **2009**, *50*, 1478–1481.
- (6) Campeau, L.-C.; Rouseaux, S.; Fagnou, K. *J. Am. Chem. Soc.* **2005**, *127*, 18020–18021.
- (7) Gosmini, C.; Bassene-Ernst, C.; Durandetti, M. *Tetrahedron* **2009**, *65*, 6141–6146.
- (8) Do, H.-Q.; Khan, R. M. K.; Dauguilis, O. *J. Am. Chem. Soc.* **2008**, *130*, 15185–15192.
- (9) Lewis, J. C.; Berman, A. M.; Bergman, R. G.; Ellman, J. A. *J. Am. Chem. Soc.* **2008**, *130*, 2493–2500.
- (10) Taillefer, M.; Xia, N.; Ouali, A. *Angew. Chem., Int. Ed.* **2007**, *46*, 934–936.
- (11) Antilla, J. C.; Maskin, J. M.; Barder, T. E.; Buchwald, S. L. *J. Org. Chem.* **2004**, *69*, 5578–5587.
- (12) Desai, L. V.; Stowers, K. J.; Sanford, M. S. *J. Am. Chem. Soc.* **2008**, *130*, 13285–13293.
- (13) Cai, G.; Fu, Y.; Li, Y.; Wan, X.; Shi, Z. *J. Am. Chem. Soc.* **2007**, *129*, 7666–7673.
- (14) Ebden, M. R.; Simpkins, N. S.; Fox, D. N. A. *Tetrahedron* **1998**, *54*, 12923–12952.
- (15) Lambert, J. B.; Wang, G.-T.; Huseland, D. E.; Takiff, L. C. *J. Org. Chem.* **1987**, *52*, 68–71.
- (16) Barluenga, J.; Fernández, M. A.; Aznar, F.; Valdés, C. *Chem. Eur. J.* **2004**, *10*, 494–507.
- (17) Chu, Y.; Shan, Z.; Liu, D.; Sun, N. *J. Org. Chem.* **2006**, *71*, 3998–4001.
- (18) Padwa, A.; Albrecht, F. *J. Org. Chem.* **1974**, *39*, 2361–2366.
- (19) Marconi, G.; Pertici, P.; Evangelisti, C.; Caporusso, A. M.; Vitulli, G.; Capannelli, G.; Hoang, M.; Turney, T. W. *J. Organomet. Chem.* **2004**, *689*, 639–646.
- (20) Liu, C.; Yang, W. *Chem. Commun.* **2009**, 6267–6269.
- (21) Sperotto, E.; van Klink, G.; de Vries, J. G.; van Koten, G. *Tetrahedron* **2010**, *66*, 3478–3484.
- (22) Chikashita, H.; Ishimoto, N.; Komazawa, S.; Itoh, K. *Heterocycles*, **1985**, *23*, 2509.

Original File:  
 Date Aug 30 11  
 Comment  
 STANDARD 1H OBSERVE

|                  |                      |
|------------------|----------------------|
| ObsNuc           | <sup>1</sup> H       |
| ExMode           | NON                  |
| ObsFreq          | 299.96 MHz           |
| ObsSet           | -1.0 kHz             |
| ObsPine          | 995.0047 Hz          |
| Point            | 16384                |
| Frequency (Span) | 4500.45 Hz           |
| Scan             | 16                   |
| AcqTime          | 3.4983 s             |
| PD               | 1.502 s              |
| Pulse1           | 6.0 $\mu$ s          |
| Temperature      | 29.0 $^{\circ}$ C    |
| Solvent          | CDCl <sub>3</sub>    |
| Reference        | 0.0 ppm              |
| Broad.Factor     | 0.1373 Hz            |
| RGain            | 30                   |
| Printed          | 2011/Sep/05 12:11:19 |
| Operator         |                      |

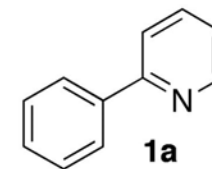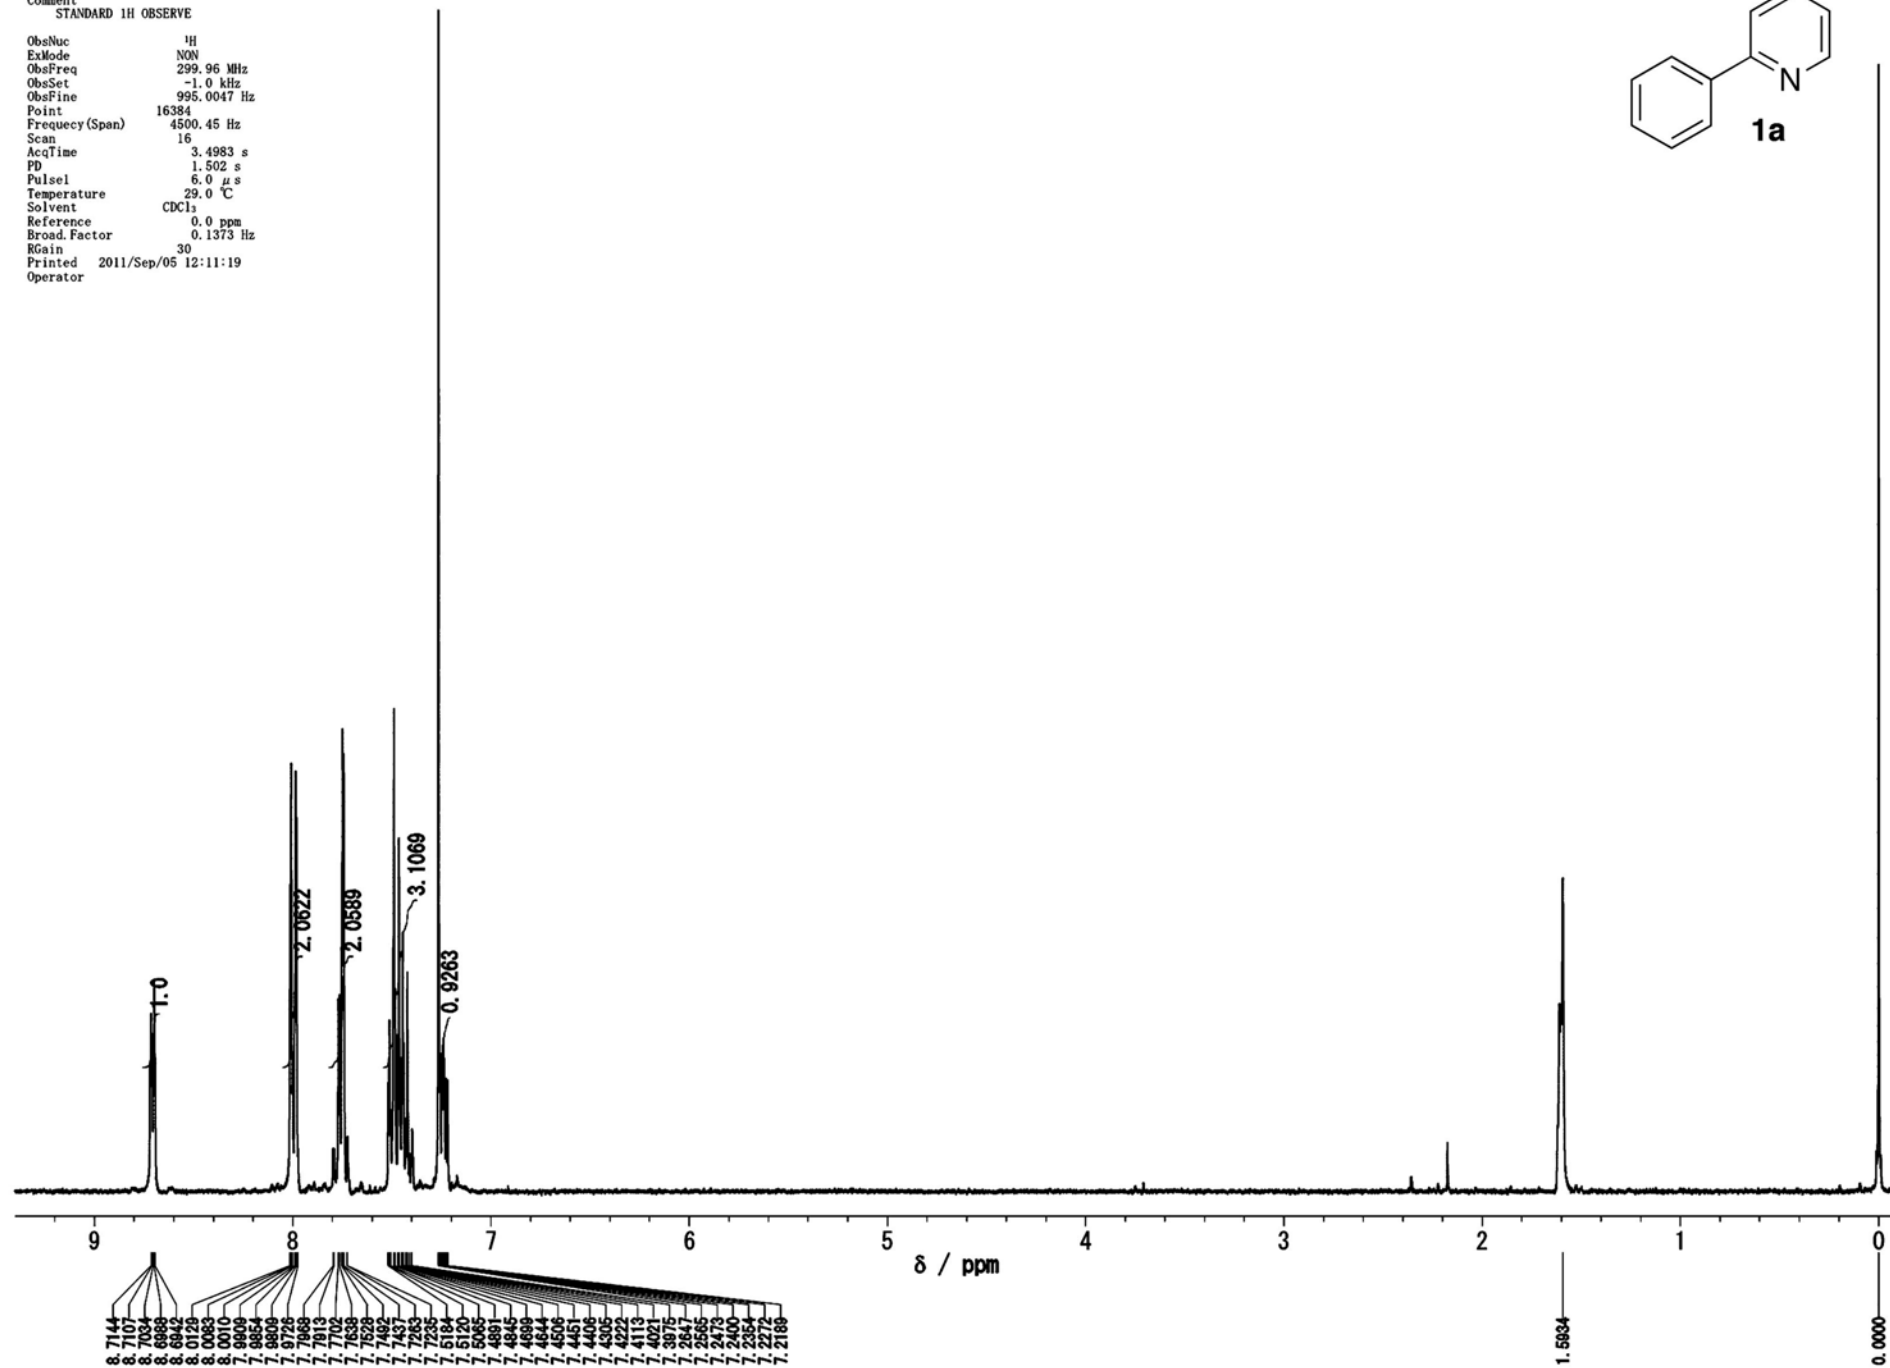

Original File:  
 Date Aug 30 11  
 Comment  
 C13 Statdard Observe  
 Stick=none Tune=6.4 Match=0.4

ObsNuc <sup>13</sup>C  
 ExMode NON  
 ObsFreq 75.43 MHz  
 ObsSet -1.0 kHz  
 ObsFine 996.3672 Hz  
 Point 32768  
 Frequency (Span) 18761.73 Hz  
 Scan 256  
 AcqTime 1.4992 s  
 PD 1.501 s  
 Pulsel 6.0  $\mu$ s  
 Temperature 29.0  $^{\circ}$ C  
 Solvent CDCl<sub>3</sub>  
 Reference 77.0 ppm  
 Broad.Factor 0.2863 Hz  
 RGain 30  
 Printed 2011/Sep/03 19:48:00  
 Operator

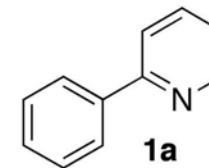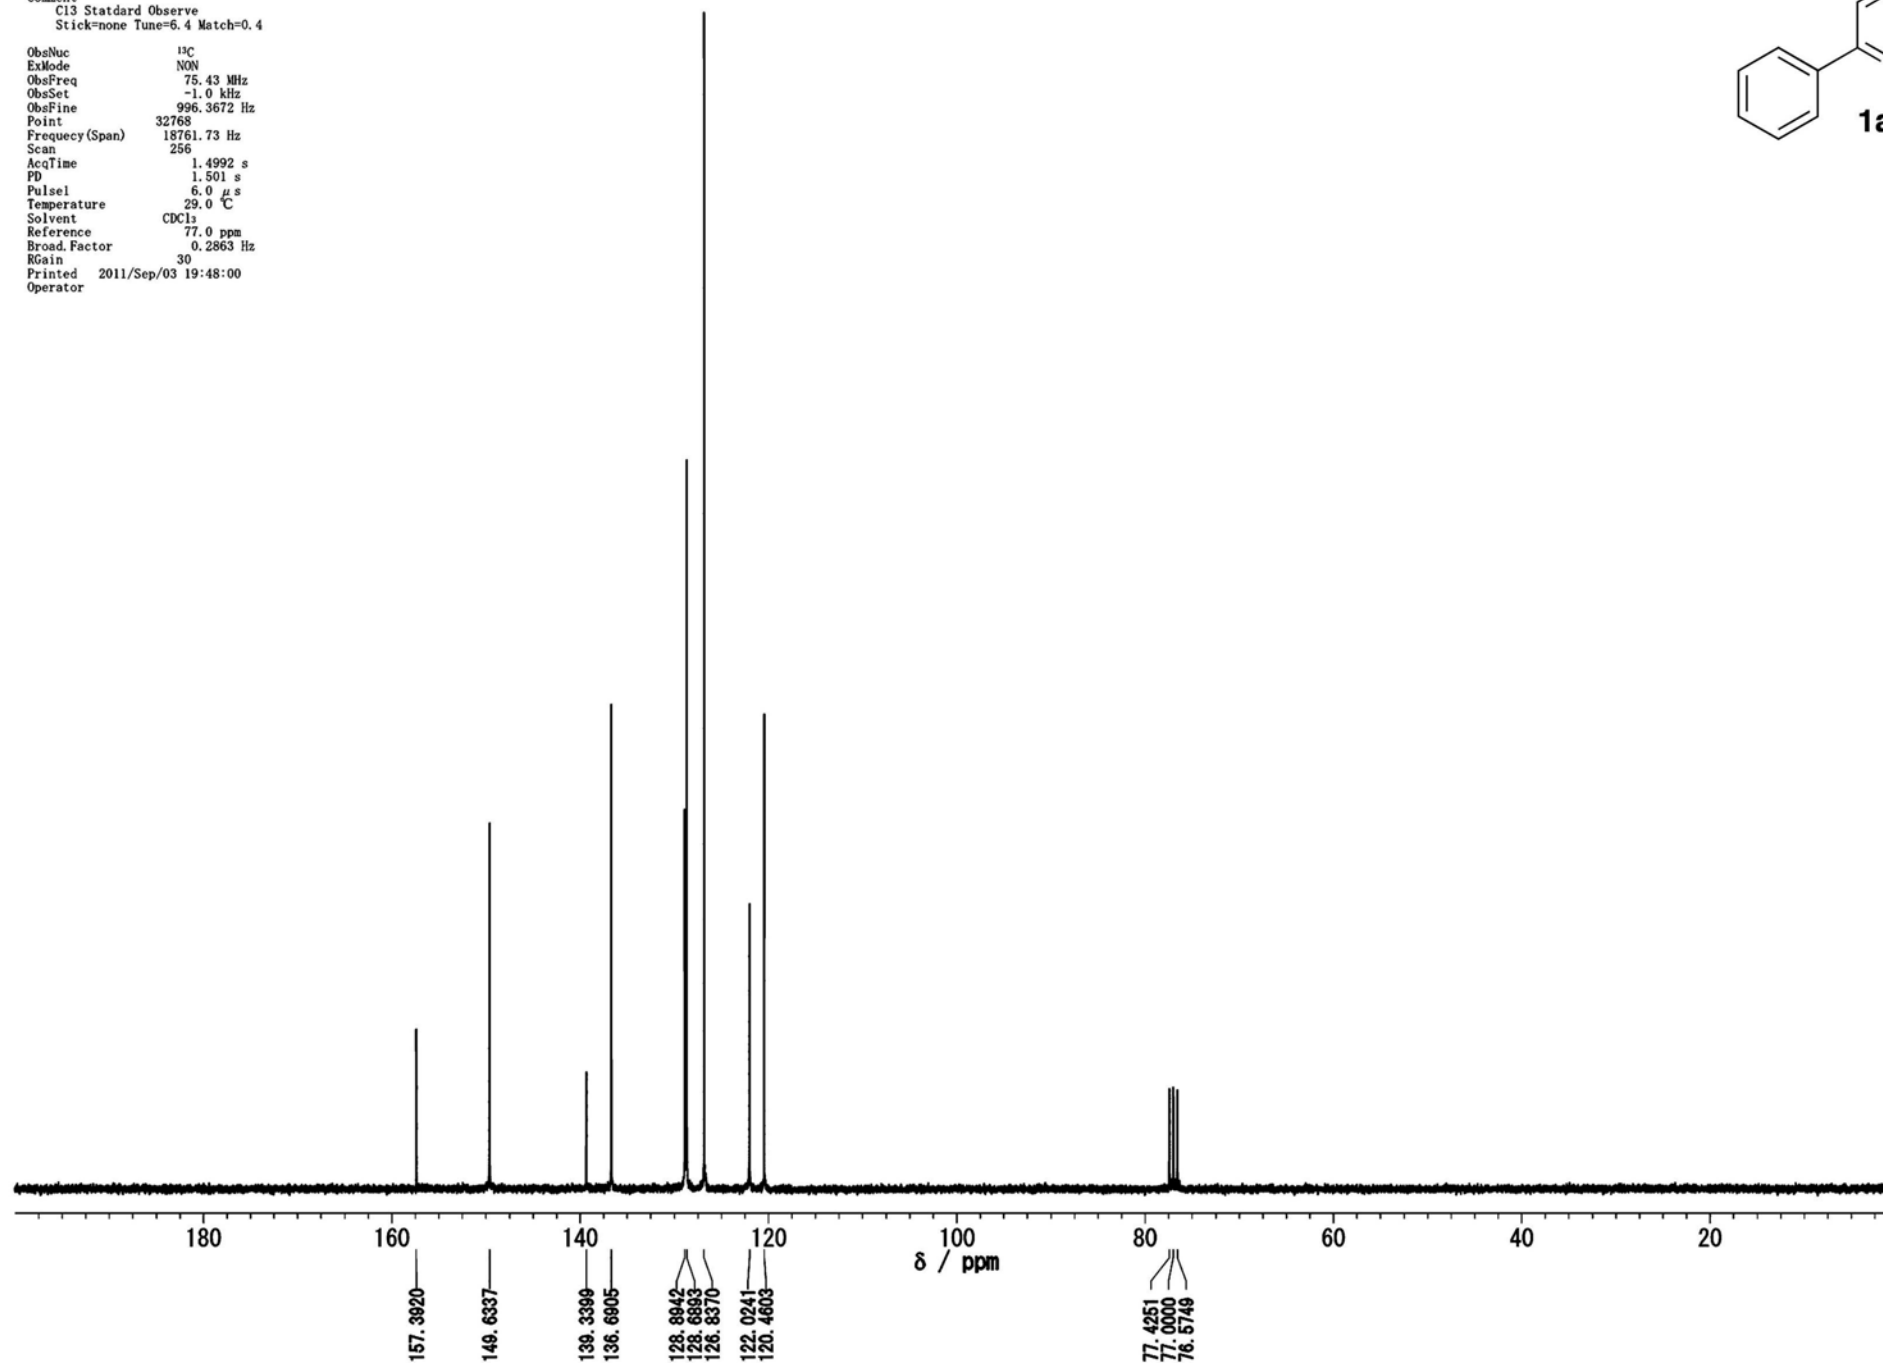

Original File:  
 Date May 29 11  
 Comment  
 STANDARD 1H OBSERVE

ObsNuc <sup>1</sup>H  
 ExMode NON  
 ObsFreq 299.96 MHz  
 ObsSet -1.0 kHz  
 ObsPine 995.0047 Hz  
 Point 16384  
 Frequency (Span) 4500.45 Hz  
 Scan 16  
 AcqTime 3.4983 s  
 PD 1.502 s  
 Pulse 6.0  $\mu$ s  
 Temperature 29.0  $^{\circ}$ C  
 Solvent CDCl<sub>3</sub>  
 Reference 0.0 ppm  
 Broad Factor 0.1373 Hz  
 RGain 26  
 Printed 2011/Sep/03 19:48:48  
 Operator

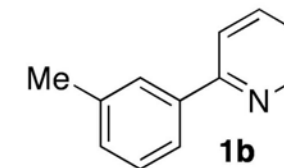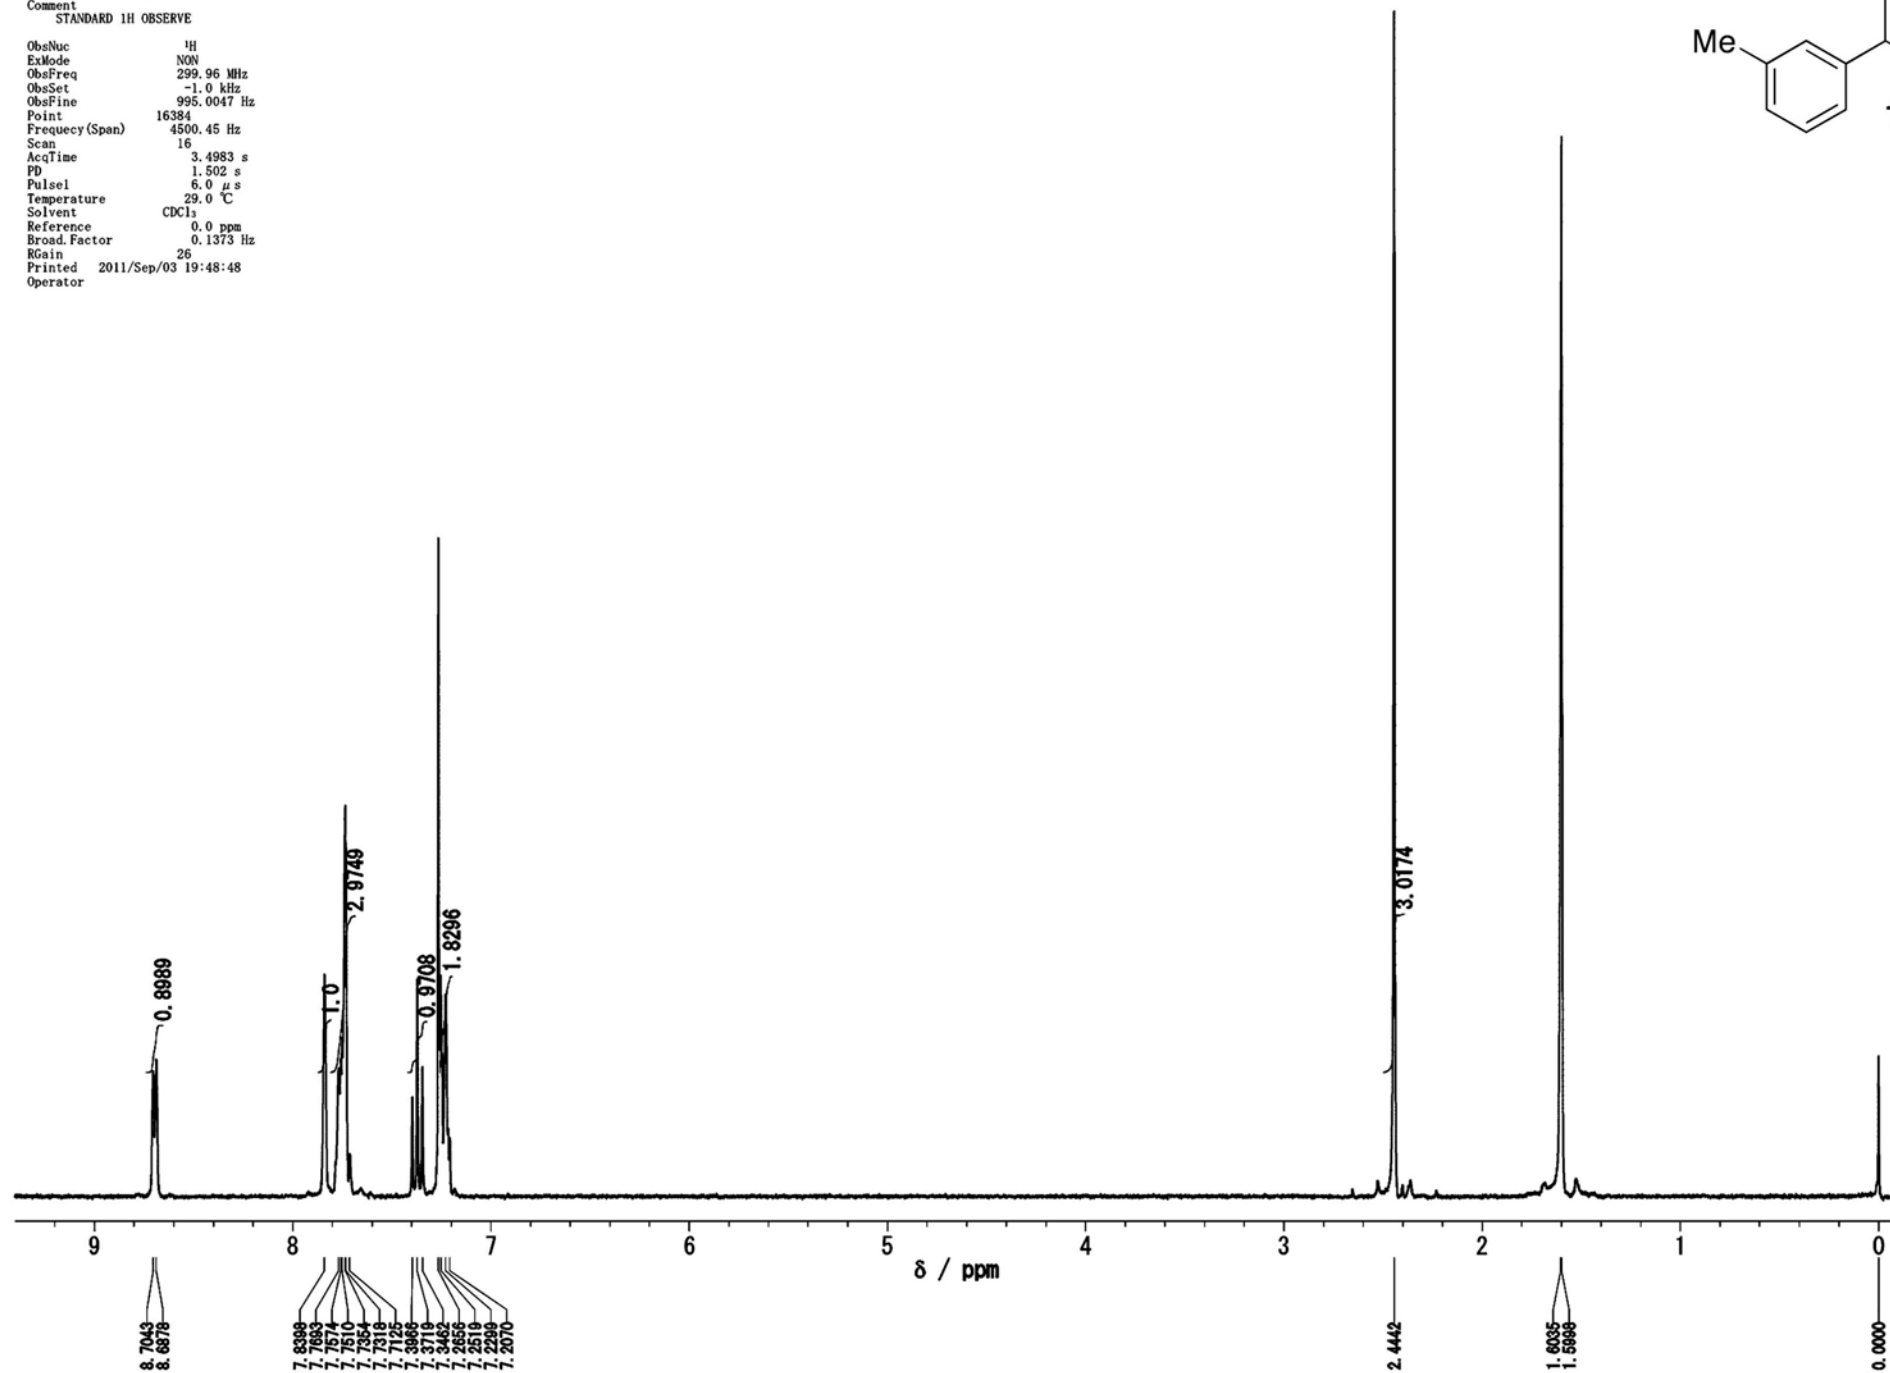

Original File:  
 Date Sep 3 11  
 Comment  
 C13 Statdard Observe  
 Stick=none Tune=6.4 Match=0.4

ObsNuc <sup>13</sup>C  
 ExMode NON  
 ObsFreq 75.43 MHz  
 ObsSet -1.0 kHz  
 ObsFine 996.3672 Hz  
 Point 32768  
 Frequency (Span) 18761.73 Hz  
 Scan 432  
 AcqTime 1.4992 s  
 PD 1.501 s  
 Pulsel 6.0  $\mu$ s  
 Temperature 29.0  $^{\circ}$ C  
 Solvent CDCl<sub>3</sub>  
 Reference 77.0 ppm  
 Broad.Factor 0.2863 Hz  
 RGain 30  
 Printed 2011/Sep/03 19:49:33  
 Operator

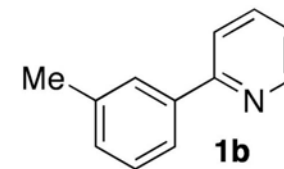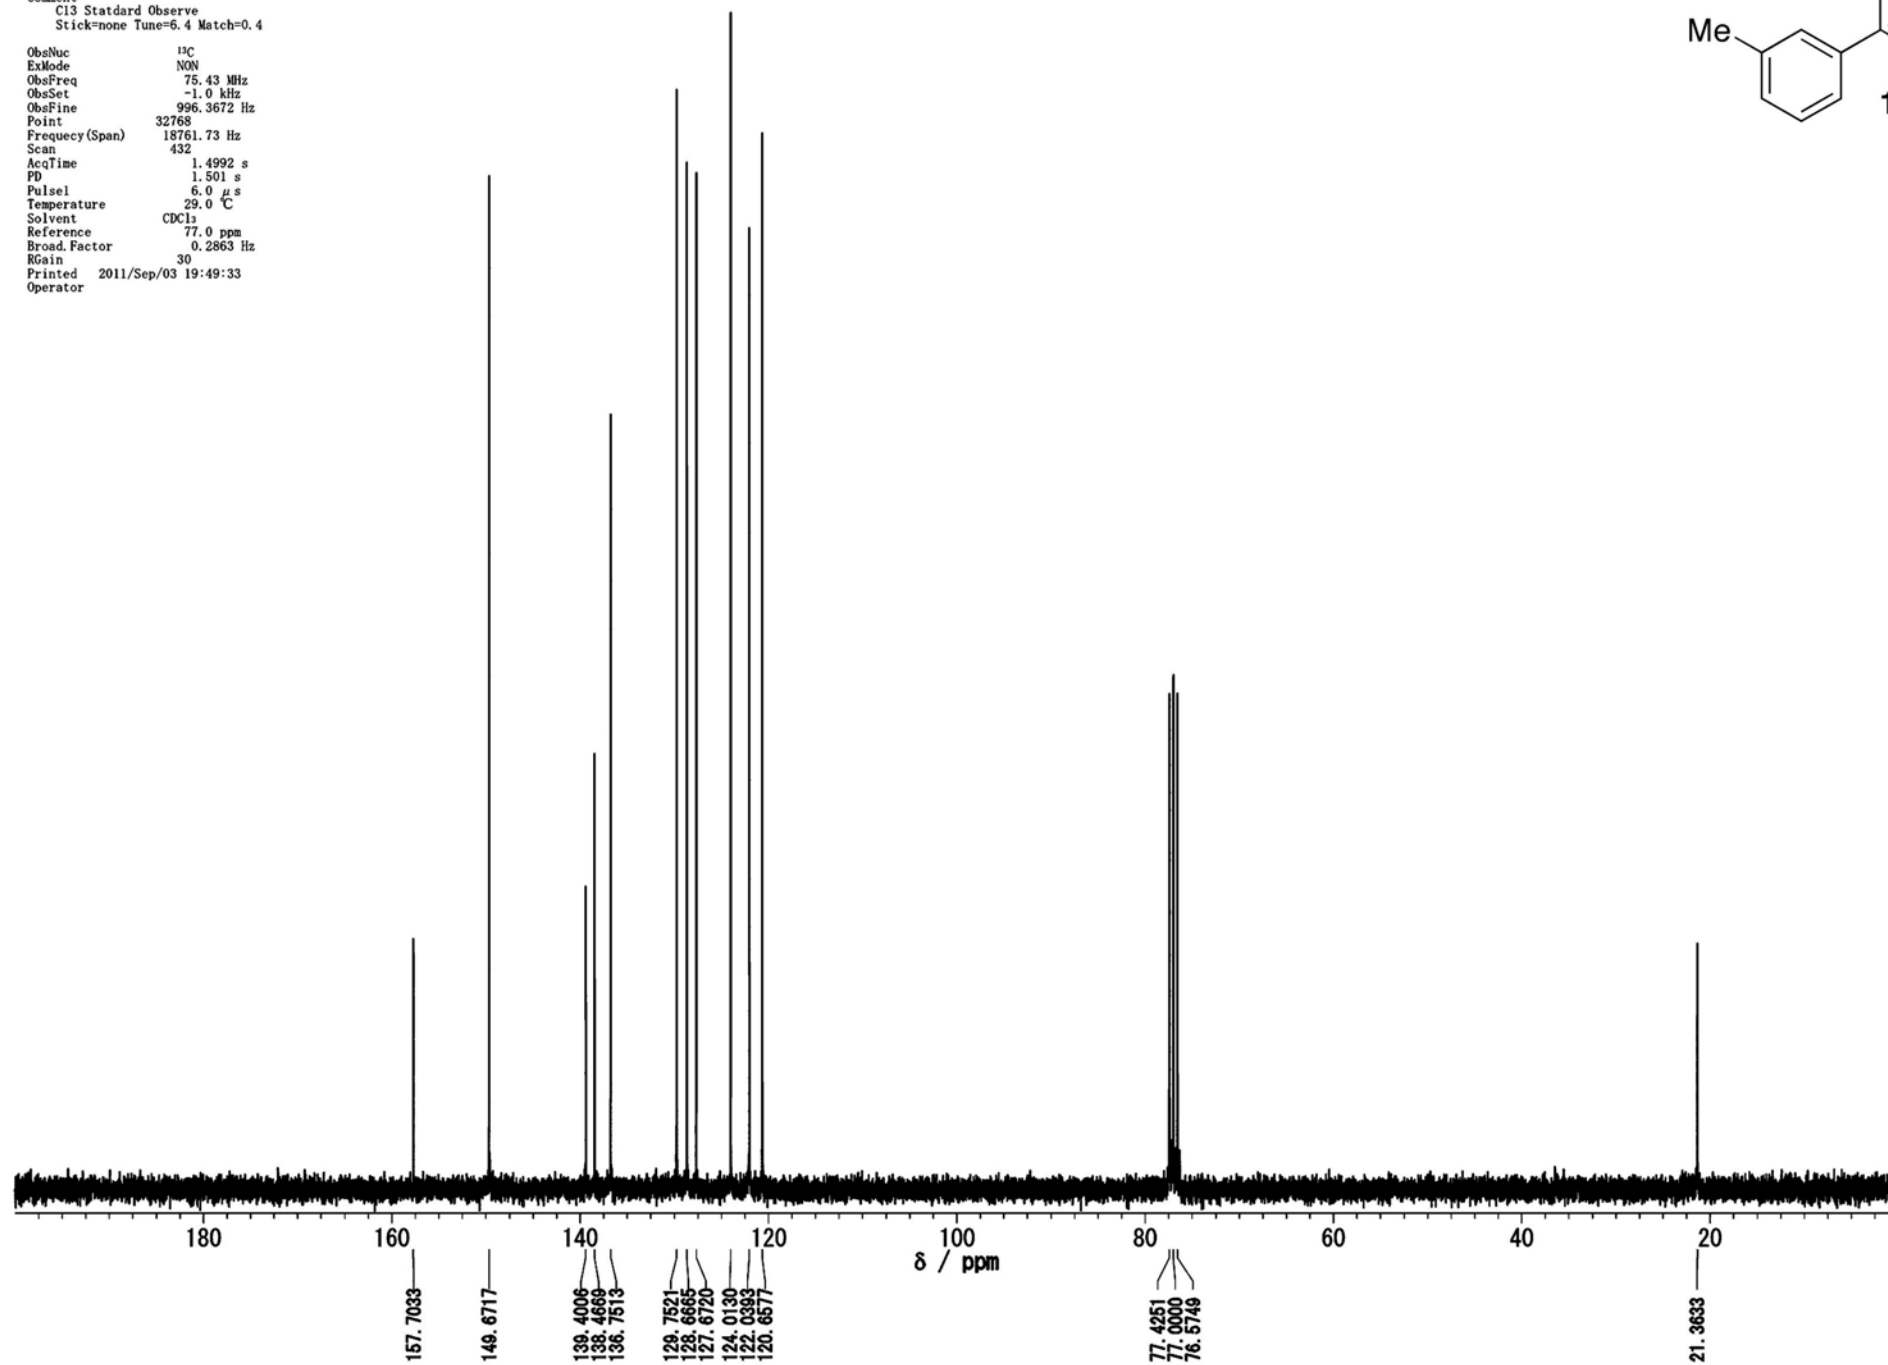



Original File: Jul 4 11  
 Date  
 Comment  
 STANDARD 1H OBSERVE  
 ObsNuc H  
 ExMode NON  
 ObsFreq 299.96 MHz  
 ObsSet -1.0 kHz  
 ObsPine 995.0047 Hz  
 Point 16384  
 Frequency (Span) 4500.45 Hz  
 Scan 16  
 AcqTime 3.4983 s  
 PD 1.502 s  
 Pulse 6.0  $\mu$ s  
 Temperature 29.0  $^{\circ}$ C  
 Solvent CDCl<sub>3</sub>  
 Reference 0.0 ppm  
 Broad Factor 0.1373 Hz  
 RGain 30  
 Printed 2011/Sep/03 19:50:33  
 Operator

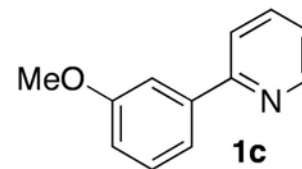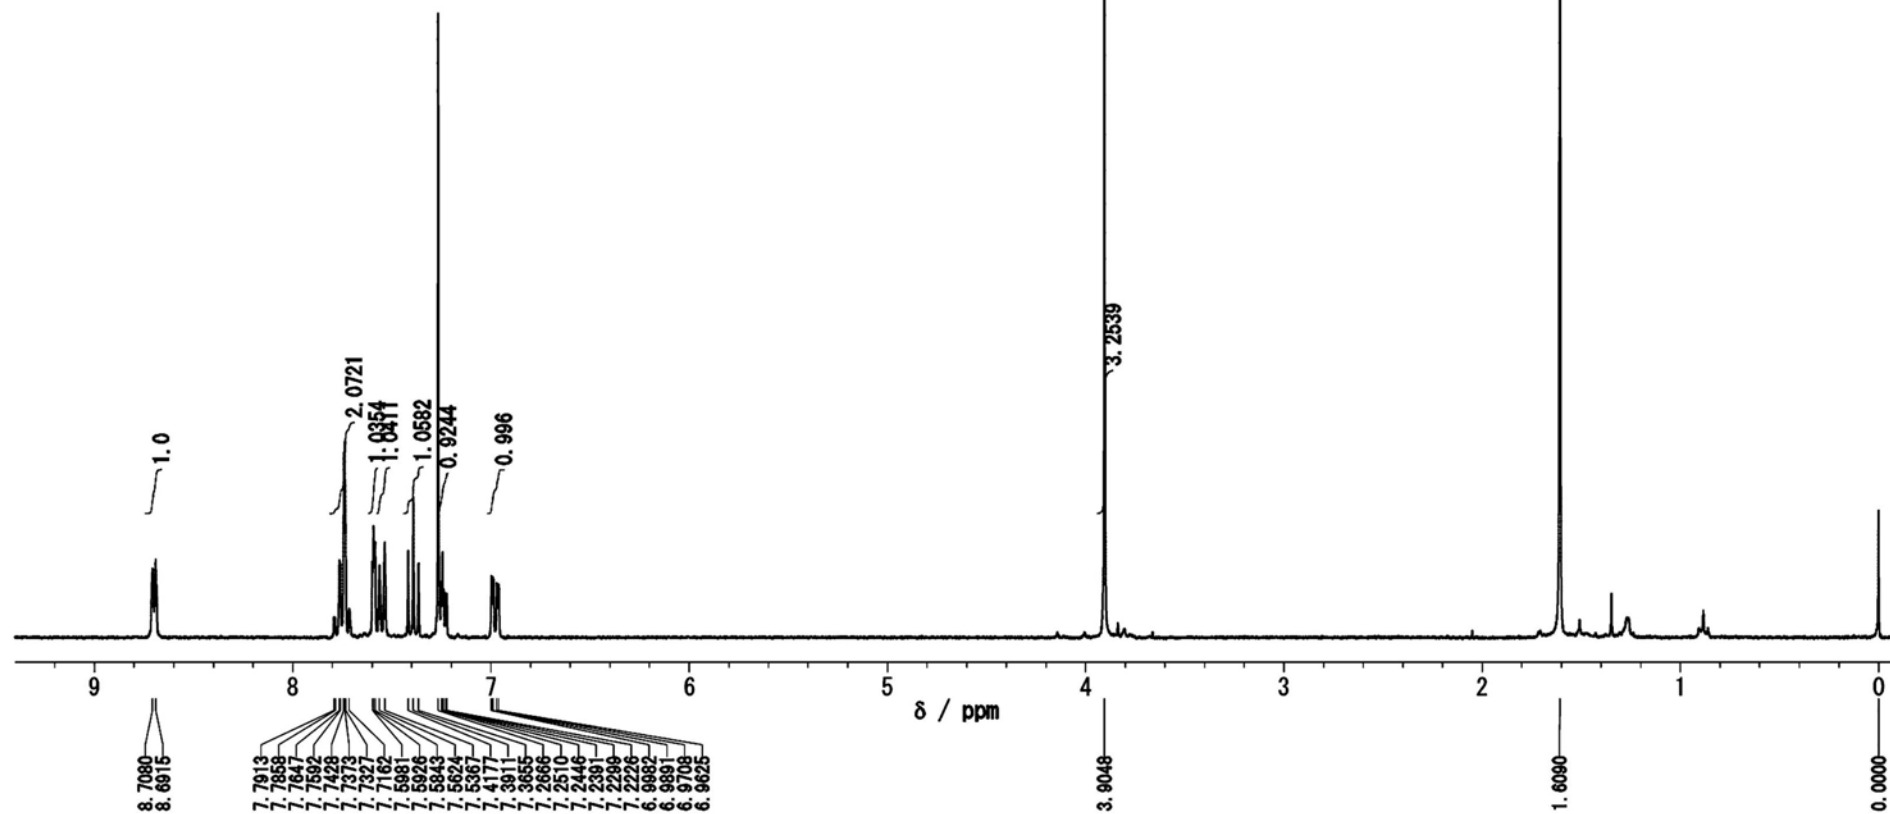

Original File:  
 Date Sep 3 11  
 Comment  
 C13 Statdard Observe  
 Stick=none Tune=6.4 Match=0.4

ObsNuc <sup>13</sup>C  
 ExMode NON  
 ObsFreq 75.43 MHz  
 ObsSet -1.0 kHz  
 ObsFine 996.3672 Hz  
 Point 32768  
 Frequency (Span) 18761.73 Hz  
 Scan 672  
 AcqTime 1.4992 s  
 PD 1.501 s  
 Pulse 6.0  $\mu$ s  
 Temperature 29.0  $^{\circ}$ C  
 Solvent CDCl<sub>3</sub>  
 Reference 77.0 ppm  
 Broad Factor 0.2863 Hz  
 RGain 30  
 Printed 2011/Sep/03 19:51:17  
 Operator

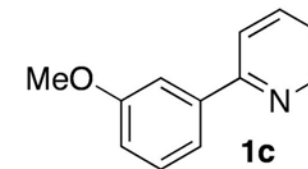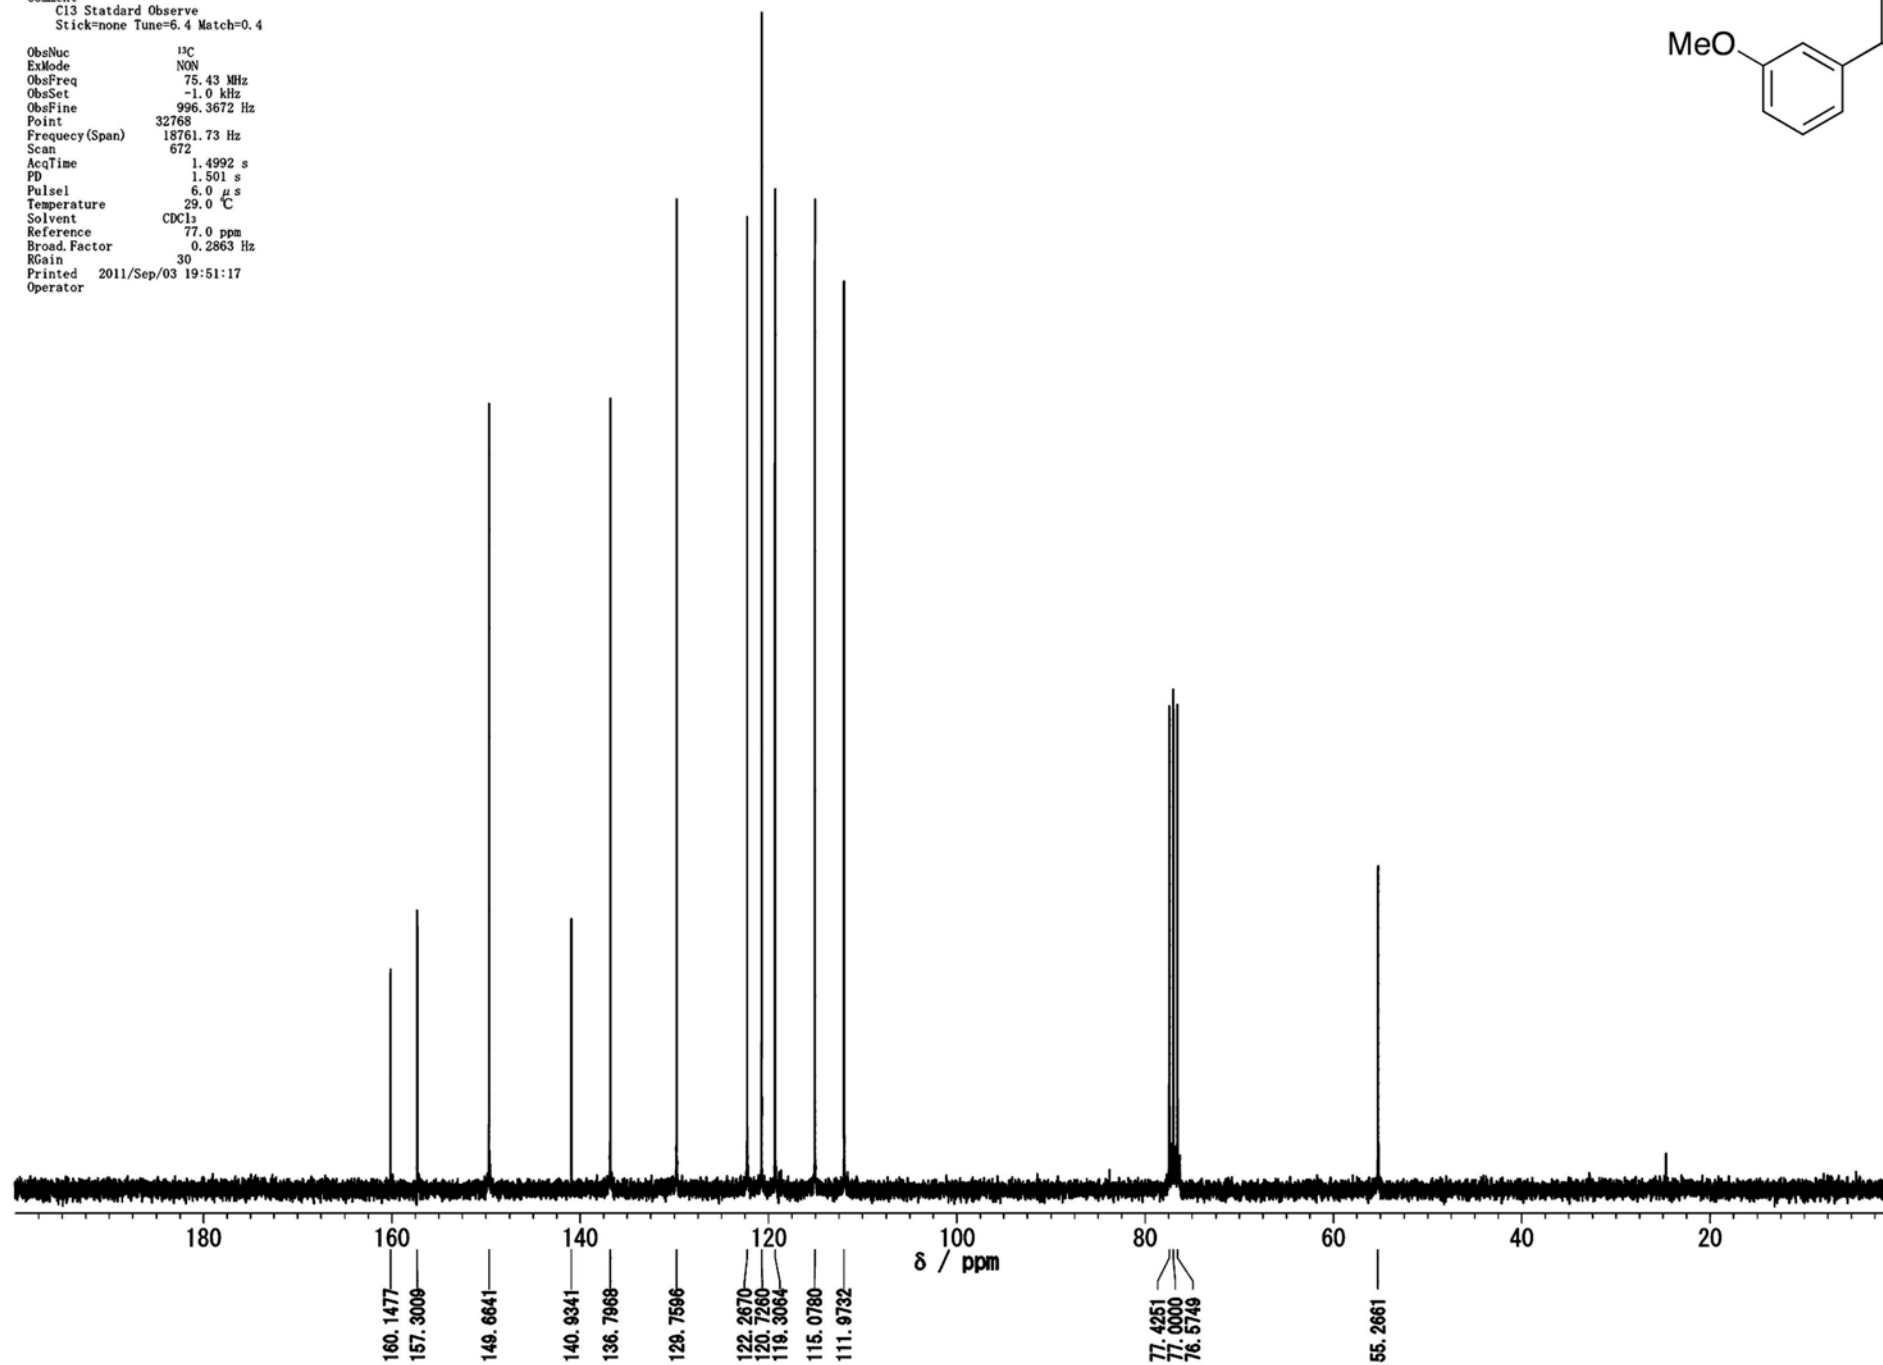

Original File:  
Date Jul 13 11  
Comment  
STANDARD 1H OBSERVE

ObsNuc H  
ExMode NON  
ObsFreq 299.96 MHz  
ObsSet -1.0 kHz  
ObsFine 995.0047 Hz  
Point 16384  
Frequency (Span) 4500.45 Hz  
Scan 16  
AcqTime 3.4983 s  
PD 1.502 s  
Pulse 6.0  $\mu$ s  
Temperature 29.0  $^{\circ}$ C  
Solvent CDCl<sub>3</sub>  
Reference 0.0 ppm  
Broad Factor 0.1373 Hz  
RGain 18  
Printed 2011/Sep/03 19:51:55  
Operator

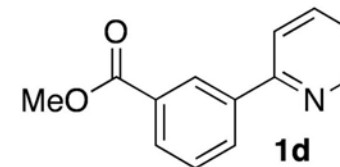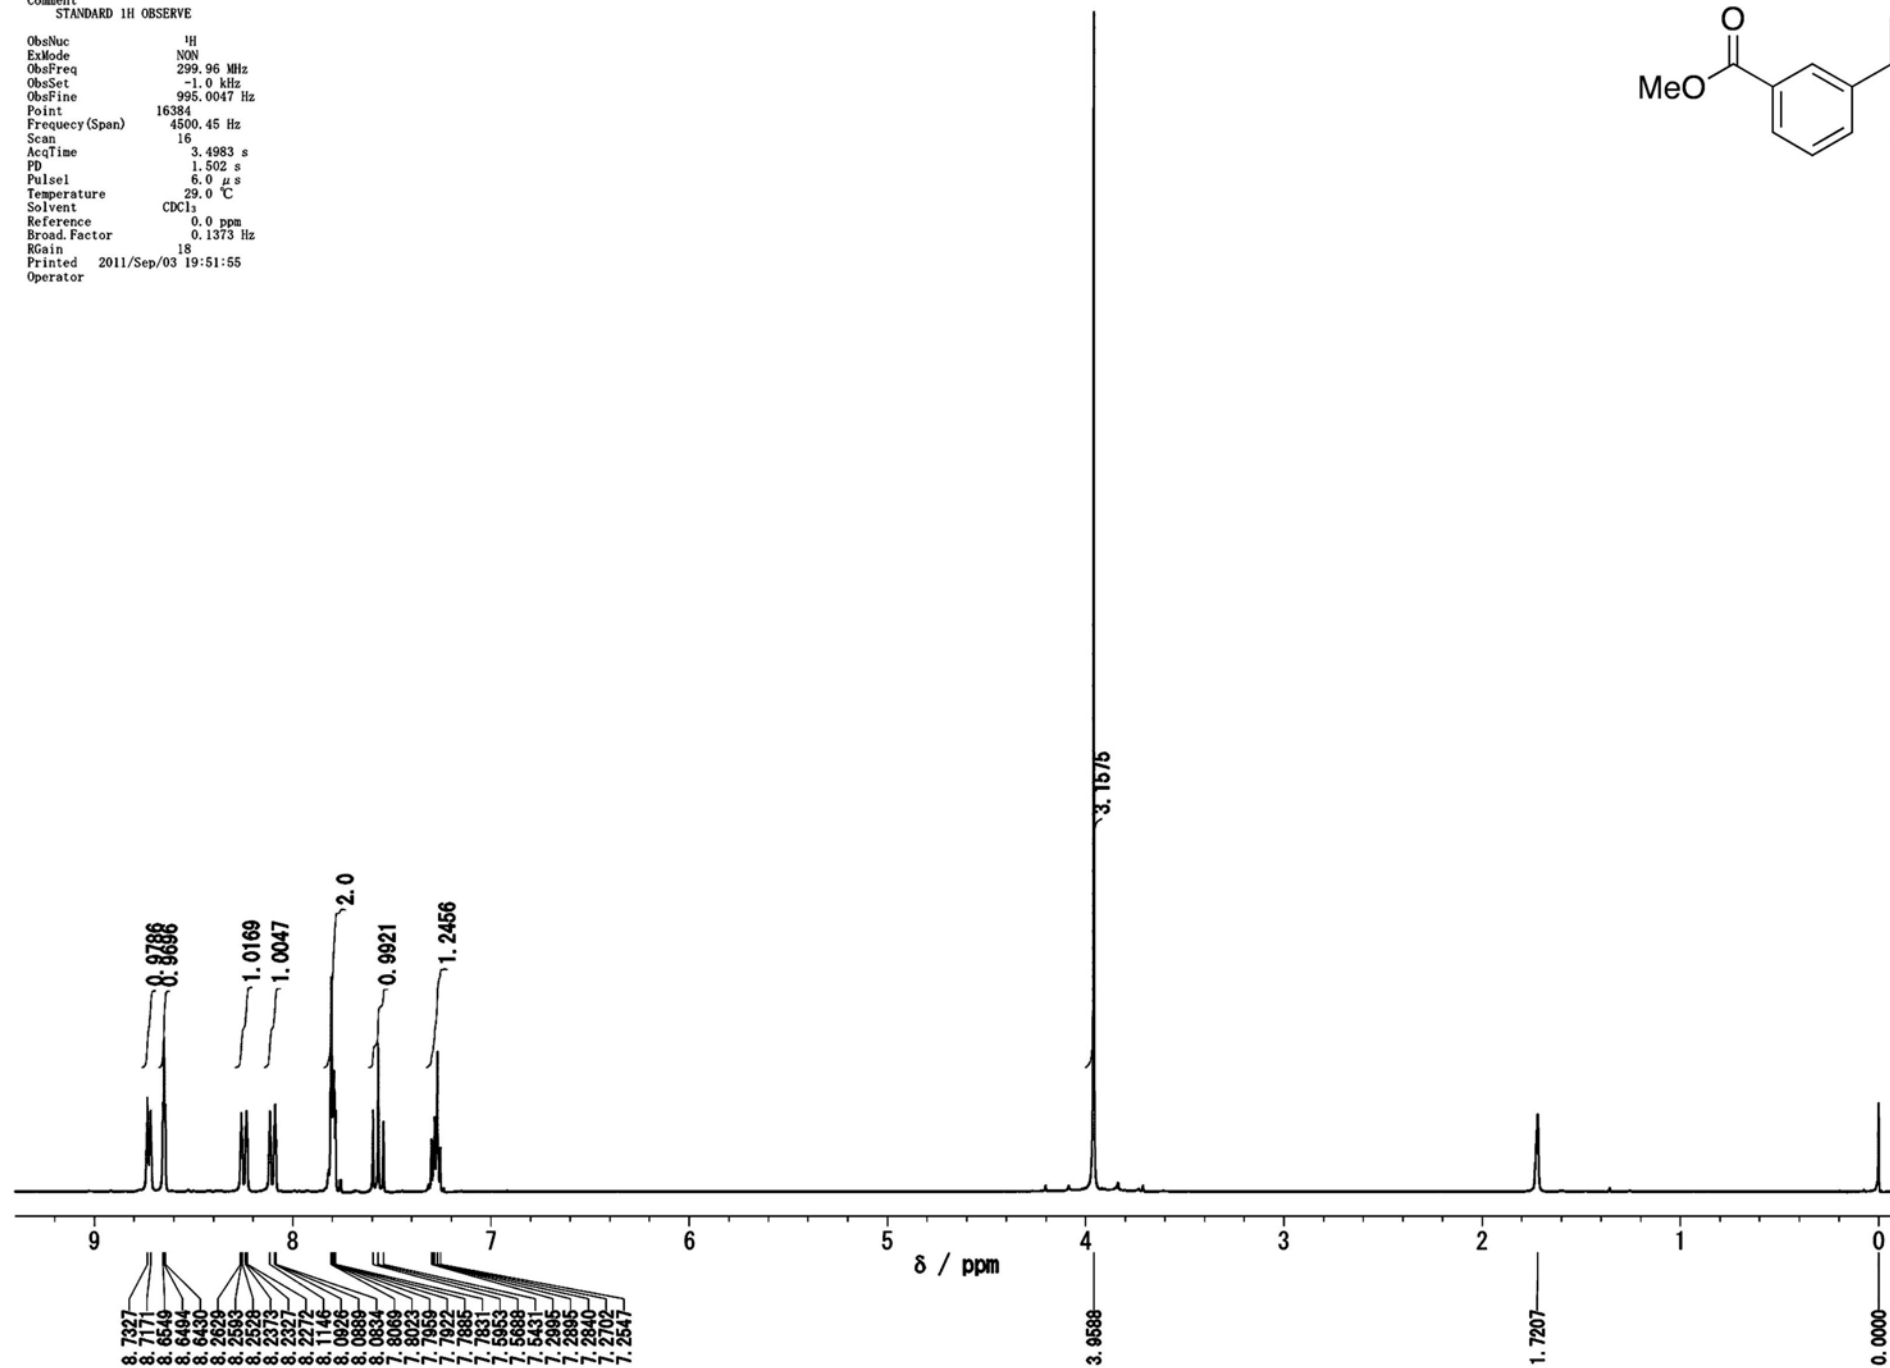

Original File:  
 Date Sep 2 11  
 Comment  
 C13 Statdard Observe  
 Stick=none Tune=6.4 Match=0.4

ObsNuc <sup>13</sup>C  
 ExMode NON  
 ObsFreq 75.43 MHz  
 ObsSet -1.0 kHz  
 ObsFine 996.3672 Hz  
 Point 32768  
 Frequency (Span) 18761.73 Hz  
 Scan 224  
 AcqTime 1.4992 s  
 PD 1.501 s  
 Pulsel 6.0  $\mu$ s  
 Temperature 29.0  $^{\circ}$ C  
 Solvent CDCl<sub>3</sub>  
 Reference 77.0 ppm  
 Broad.Factor 0.2863 Hz  
 RGain 30  
 Printed 2011/Sep/03 19:52:46  
 Operator

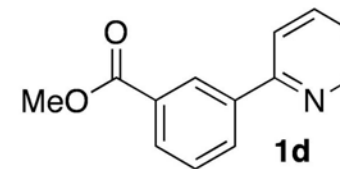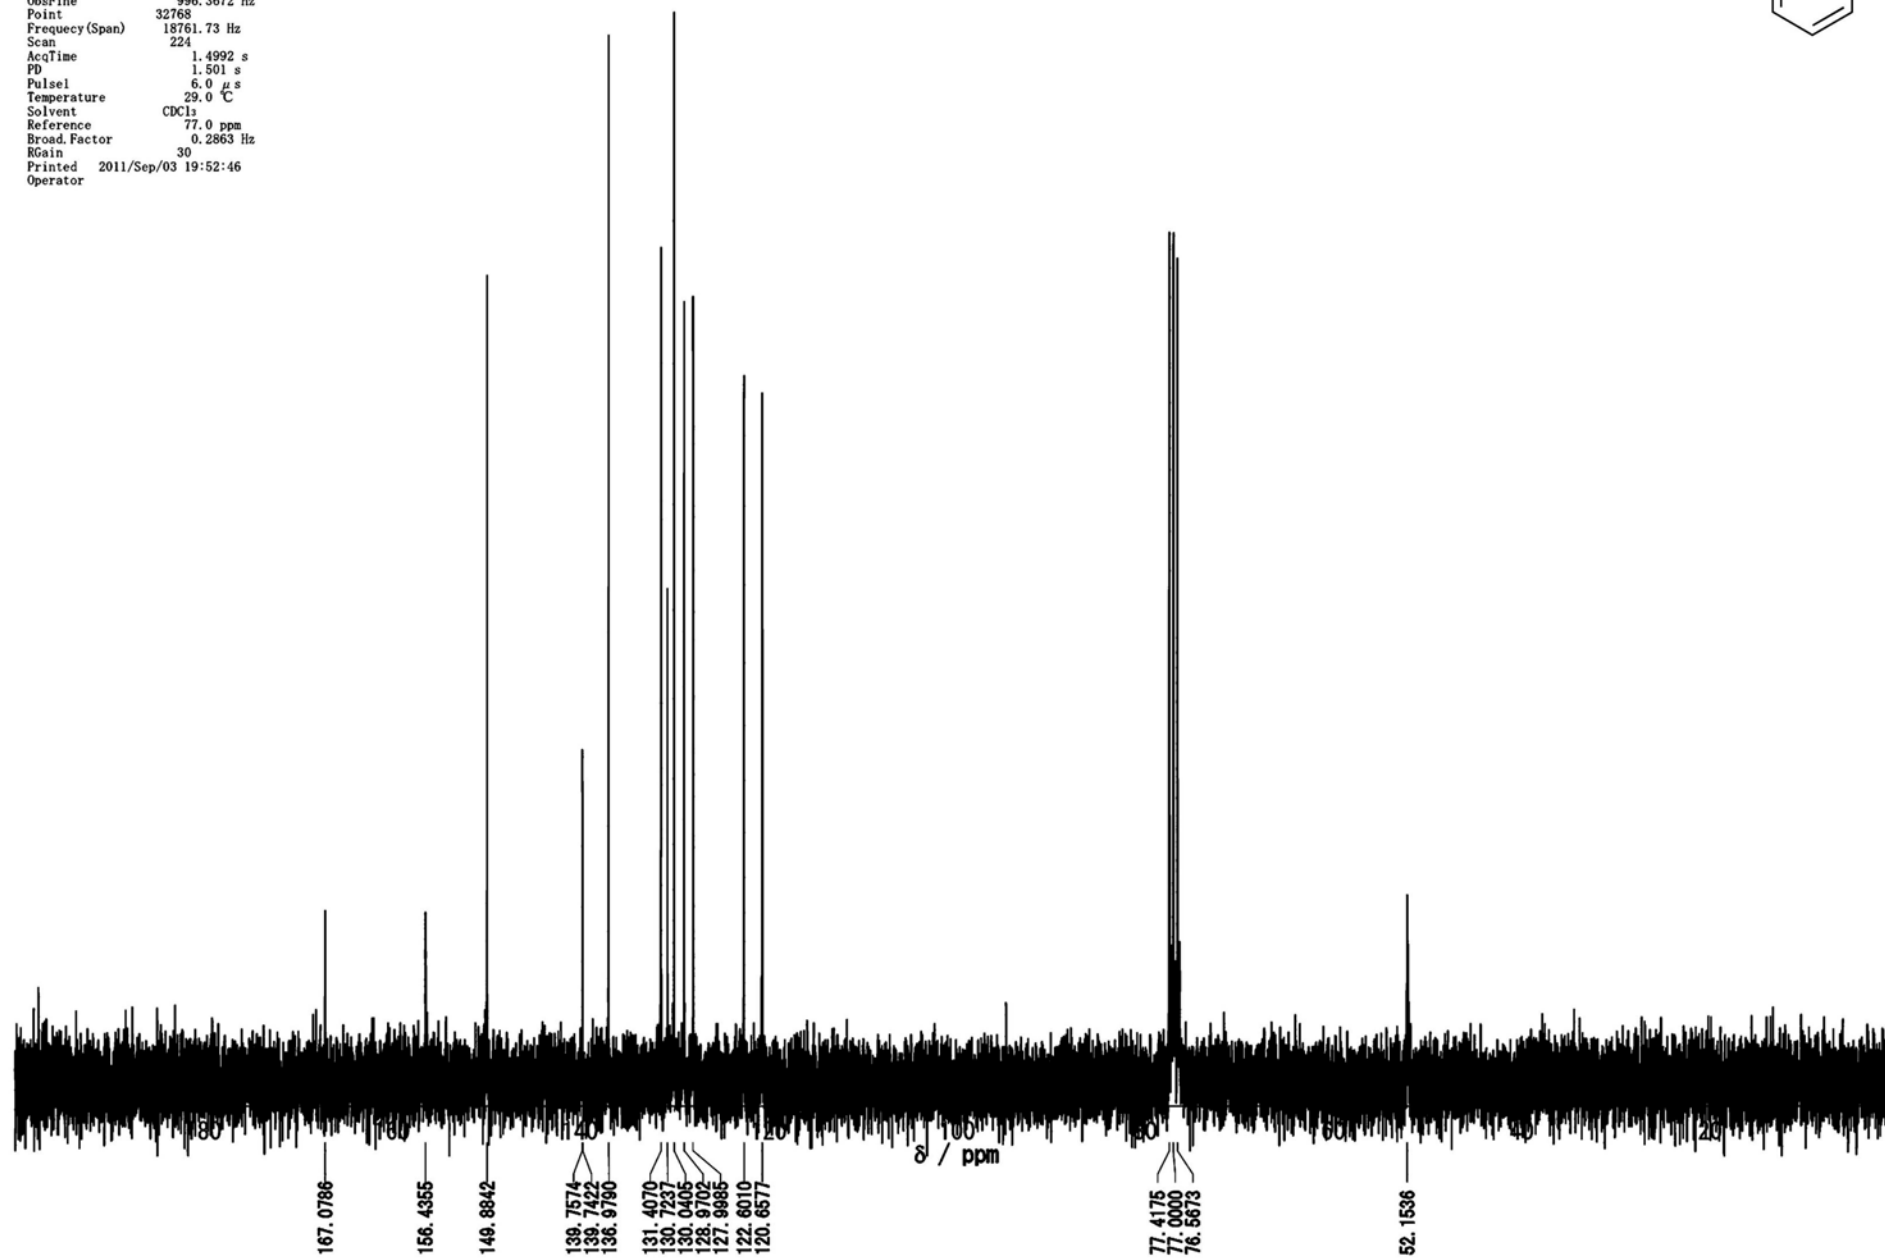

Original File:  
 Date May 29 11  
 Comment  
 STANDARD 1H OBSERVE  
 ObsNuc <sup>1</sup>H  
 ExMode NON  
 ObsFreq 299.96 MHz  
 ObsSet -1.0 kHz  
 ObsPine 995.0047 Hz  
 Point 16384  
 Frequency (Span) 4500.45 Hz  
 Scan 16  
 AcqTime 3.4983 s  
 PD 1.502 s  
 Pulse 6.0  $\mu$ s  
 Temperature 29.0  $^{\circ}$ C  
 Solvent CDCl<sub>3</sub>  
 Reference 0.0 ppm  
 Broad. Factor 0.1373 Hz  
 RGain 30  
 Printed 2011/Sep/03 19:53:47  
 Operator

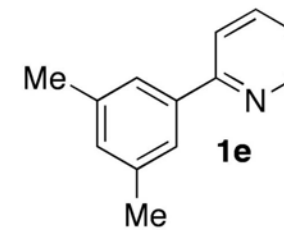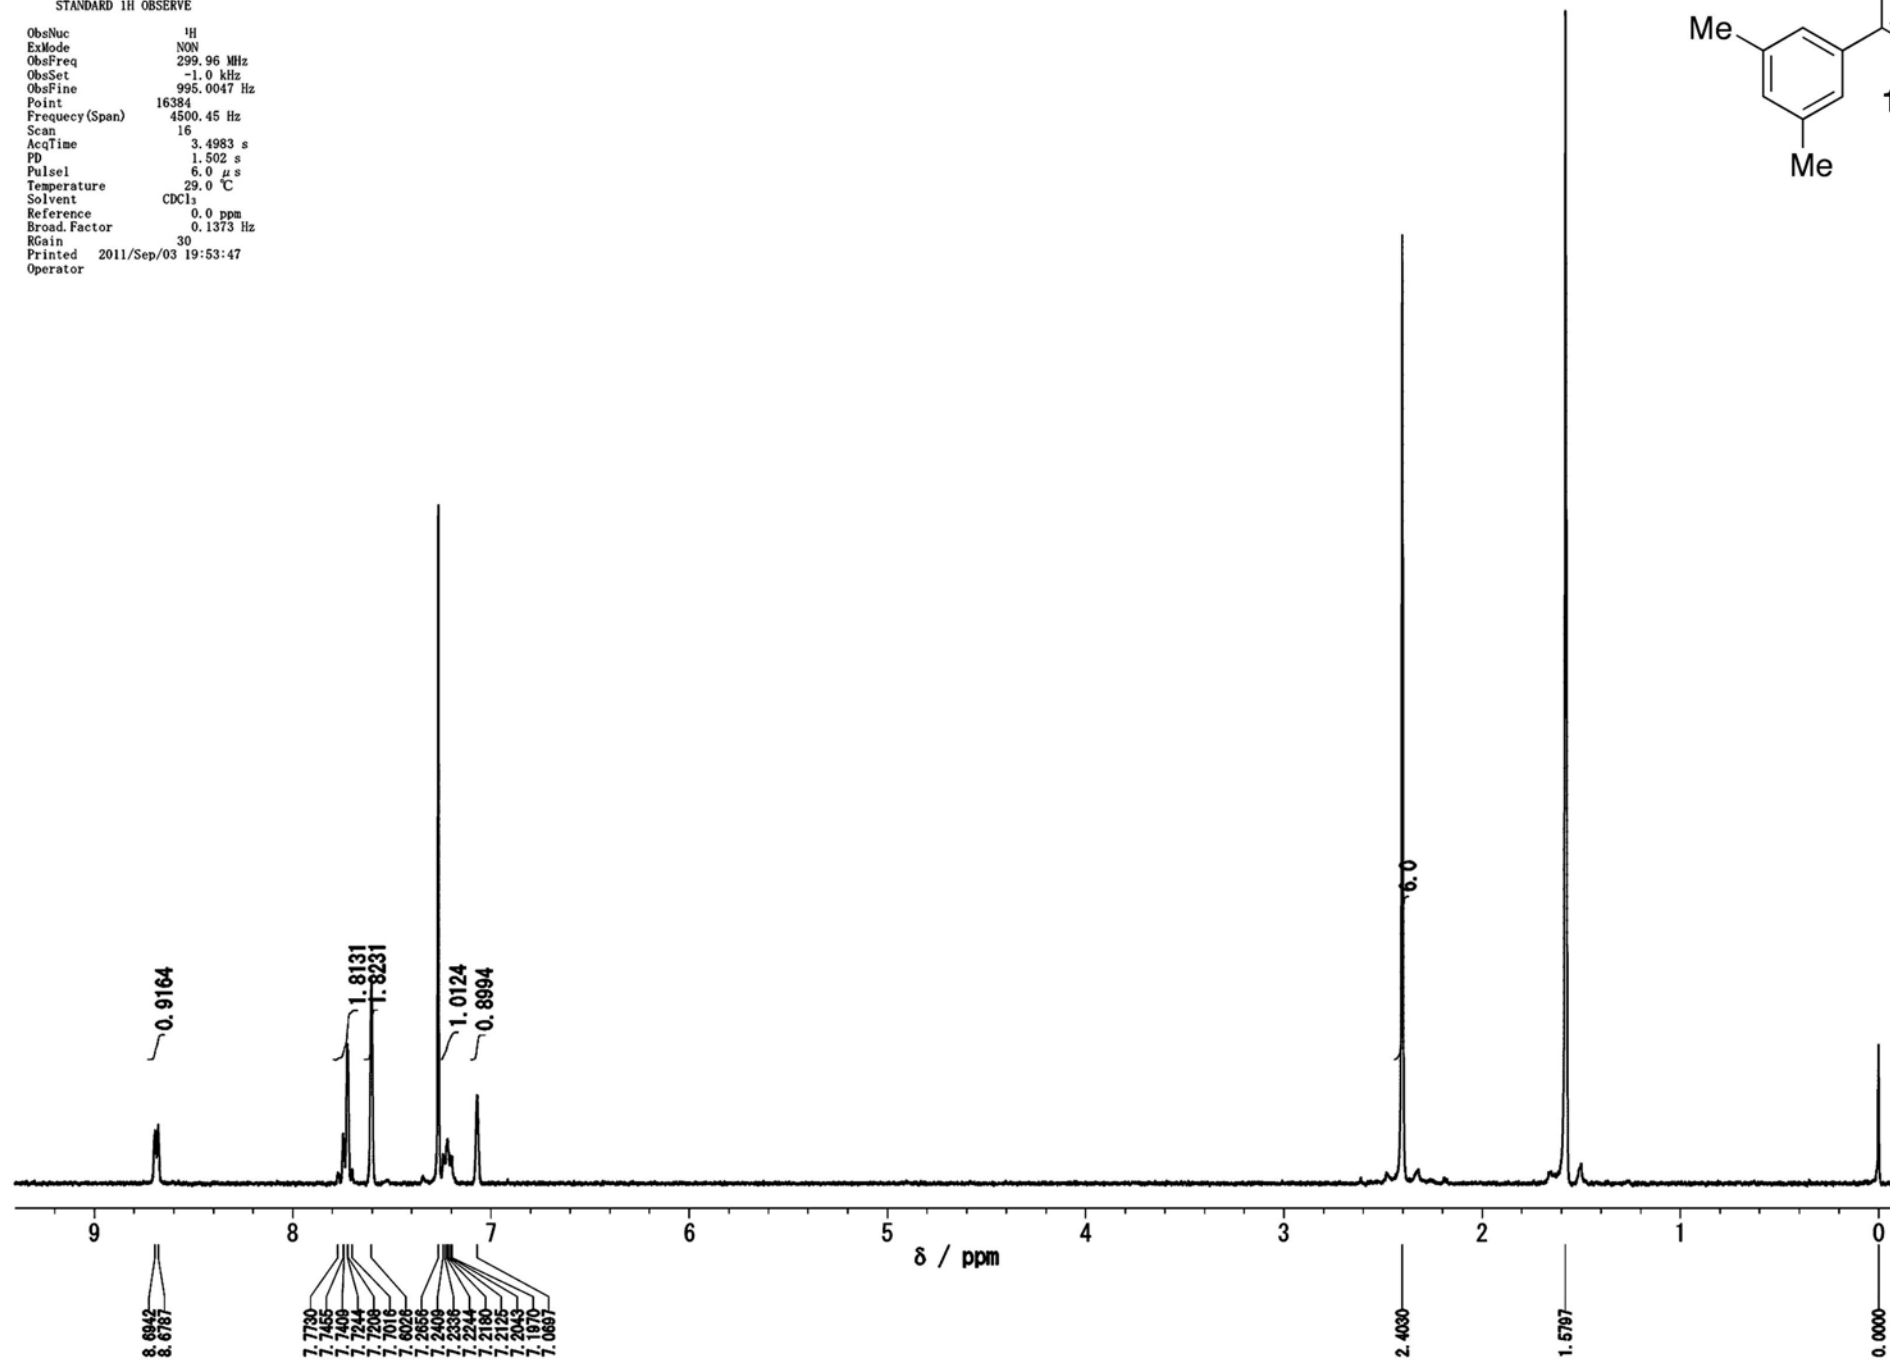

Original File:  
 Date Aug 30 11  
 Comment  
 C13 Statdard Observe  
 Stick=none Tune=6.4 Match=0.4

ObsNuc <sup>13</sup>C  
 ExMode NON  
 ObsFreq 75.43 MHz  
 ObsSet -1.0 kHz  
 ObsFine 996.3672 Hz  
 Point 32768  
 Frequency (Span) 18761.73 Hz  
 Scan 288  
 AcqTime 1.4992 s  
 PD 1.501 s  
 Pulsel 6.0  $\mu$ s  
 Temperature 29.0  $^{\circ}$ C  
 Solvent CDCl<sub>3</sub>  
 Reference 77.0 ppm  
 Broad.Factor 0.2863 Hz  
 RGain 30  
 Printed 2011/Sep/03 19:55:00  
 Operator

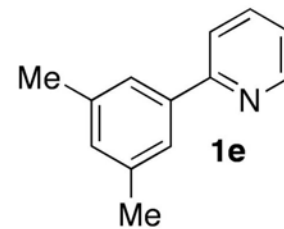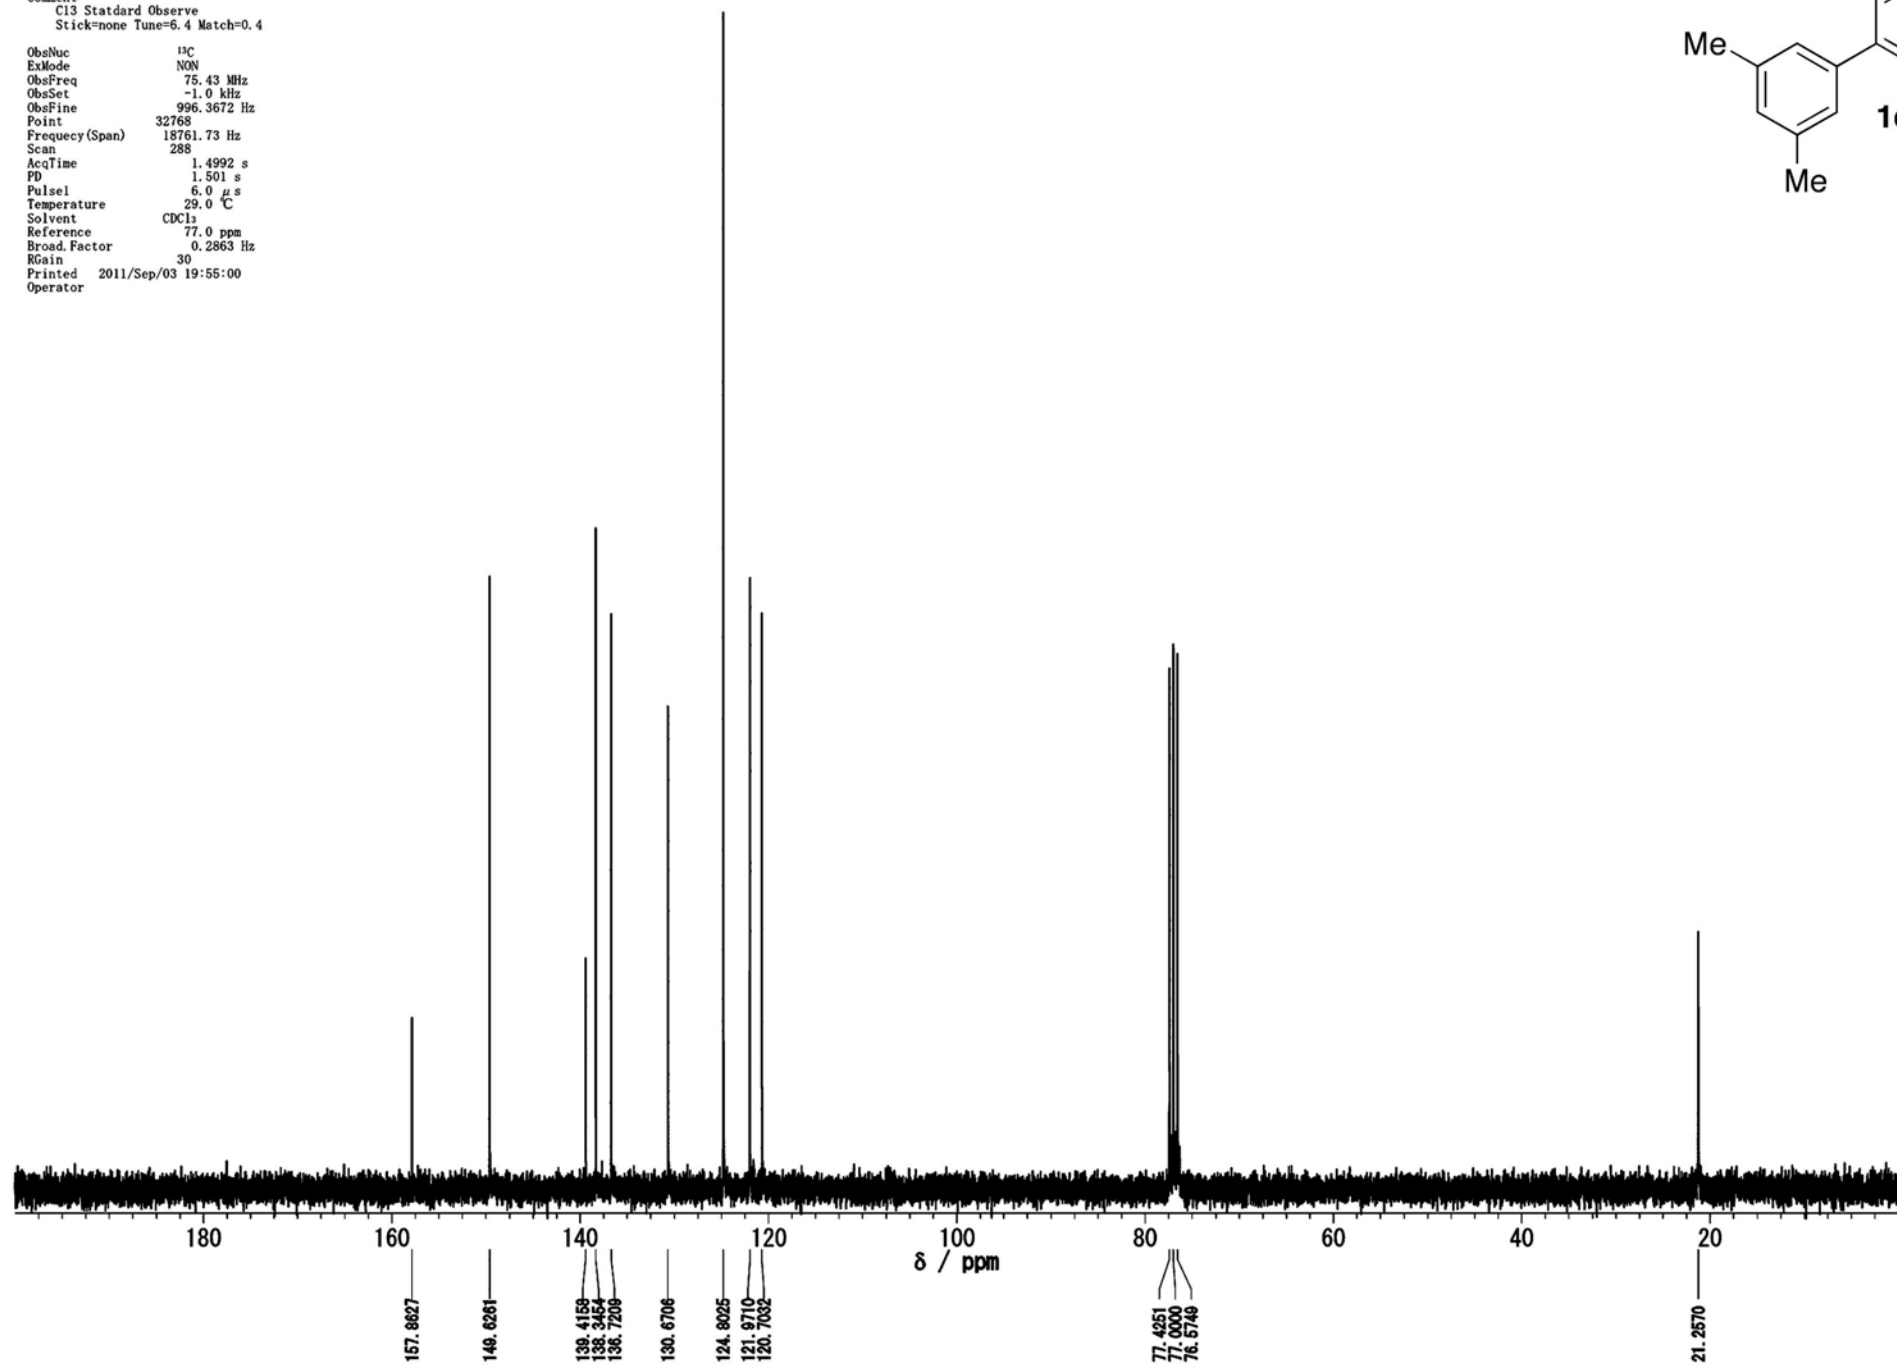

Original File:  
 Date Sep 2 11  
 Comment  
 STANDARD 1H OBSERVE

|                  |                      |
|------------------|----------------------|
| ObsNuc           | <sup>1</sup> H       |
| ExMode           | NON                  |
| ObsFreq          | 299.96 MHz           |
| ObsSet           | -1.0 kHz             |
| ObsPine          | 995.0047 Hz          |
| Point            | 16384                |
| Frequency (Span) | 4500.45 Hz           |
| Scan             | 16                   |
| AcqTime          | 3.4983 s             |
| PD               | 1.502 s              |
| Pulse1           | 6.0 $\mu$ s          |
| Temperature      | 29.0 $^{\circ}$ C    |
| Solvent          | CDCl <sub>3</sub>    |
| Reference        | 0.0 ppm              |
| Broad. Factor    | 0.1373 Hz            |
| RGain            | 30                   |
| Printed          | 2011/Sep/03 19:56:18 |
| Operator         |                      |

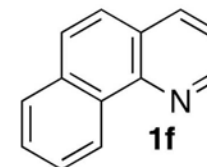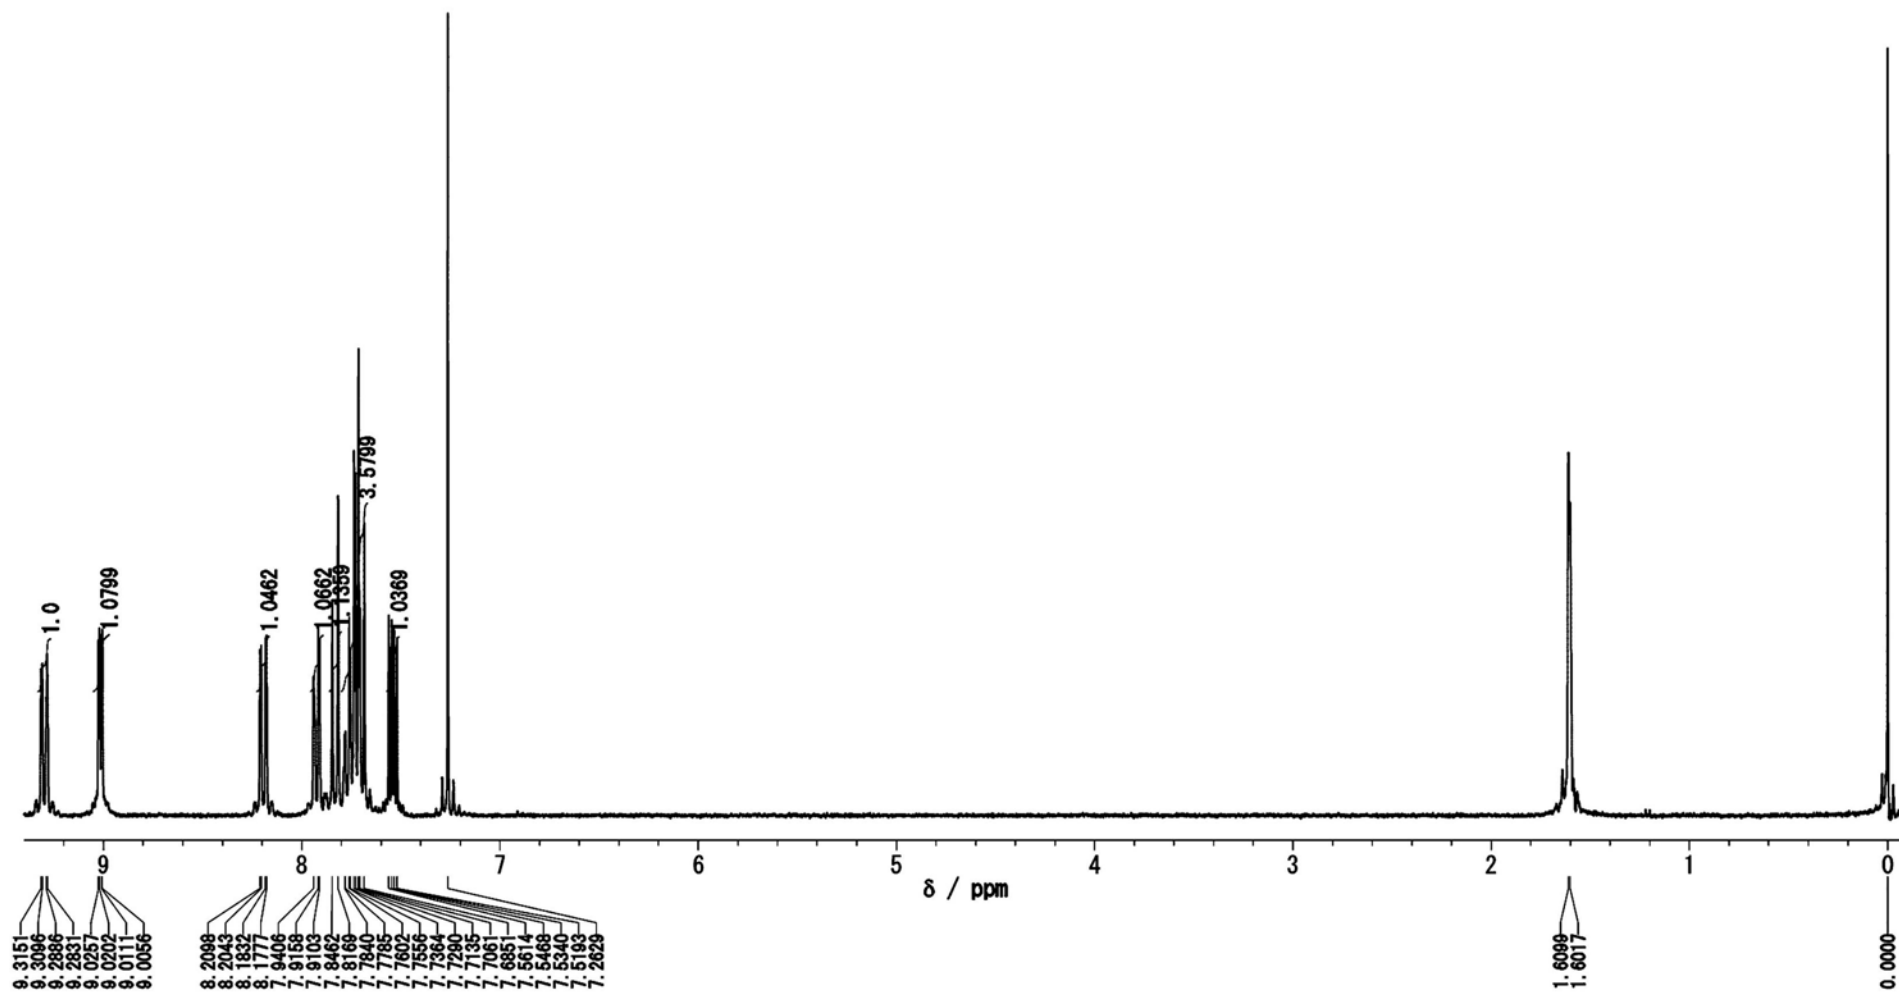

Original File:  
 Date Sep 2 11  
 Comment  
 C13 Statdard Observe  
 Stick=none Tune=6.4 Match=0.4

ObsNuc <sup>13</sup>C  
 ExMode NON  
 ObsFreq 75.43 MHz  
 ObsSet -1.0 kHz  
 ObsFine 996.3672 Hz  
 Point 32768  
 Frequency (Span) 18761.73 Hz  
 Scan 240  
 AcqTime 1.4992 s  
 PD 1.501 s  
 Pulsel 6.0  $\mu$ s  
 Temperature 29.0  $^{\circ}$ C  
 Solvent CDCl<sub>3</sub>  
 Reference 77.0 ppm  
 Broad.Factor 0.2863 Hz  
 RGain 30  
 Printed 2011/Sep/03 19:57:02  
 Operator

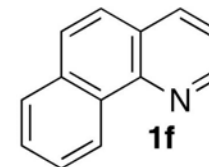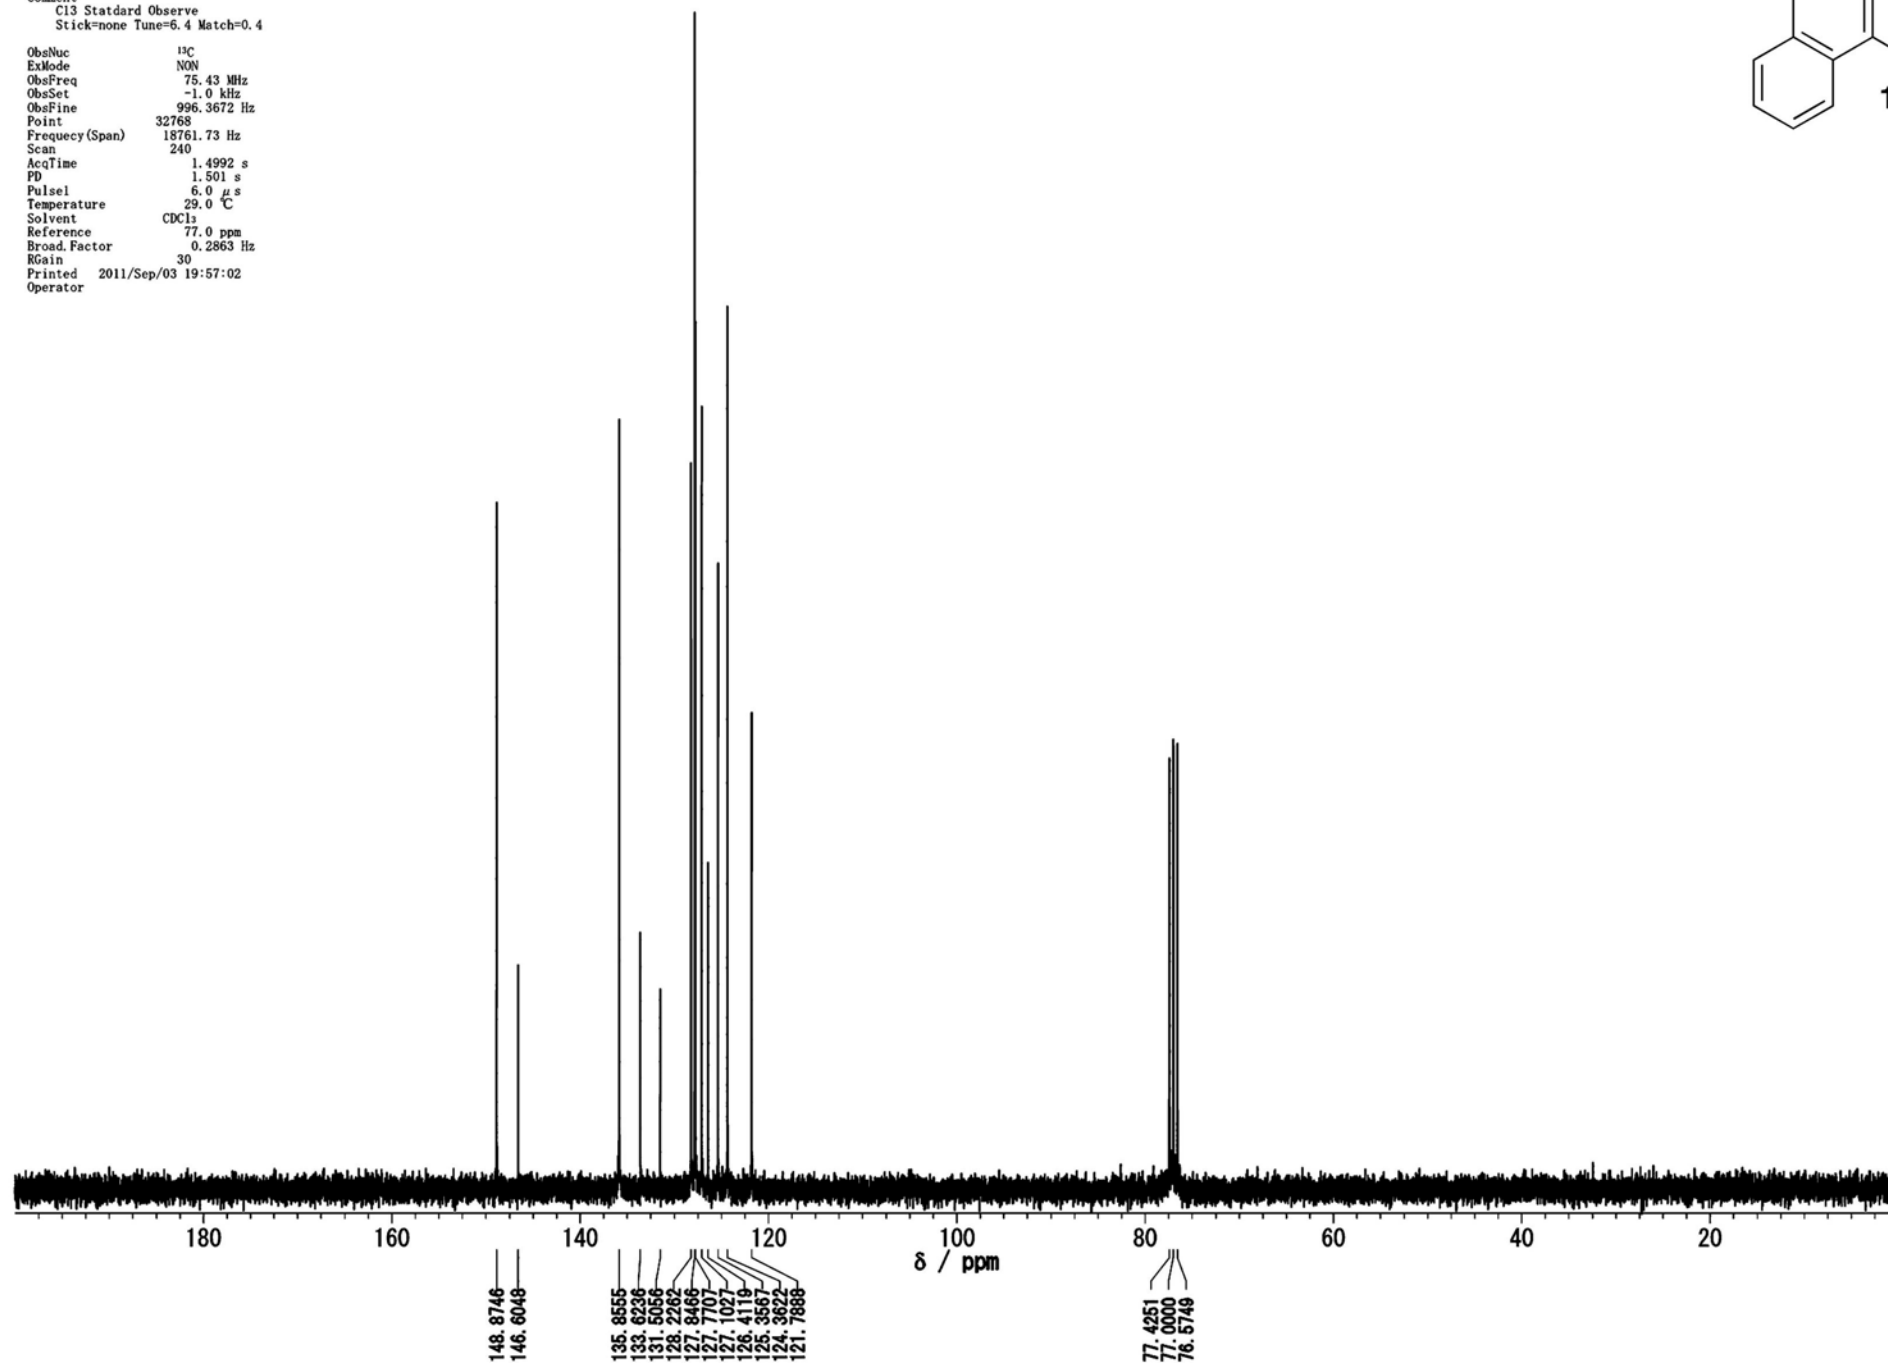



Original File:  
 Date Sep 2 11  
 Comment  
 STANDARD 1H OBSERVE

|                  |                      |
|------------------|----------------------|
| ObsNuc           | 1H                   |
| ExMode           | NON                  |
| ObsFreq          | 299.96 MHz           |
| ObsSet           | -1.0 kHz             |
| ObsPine          | 995.0047 Hz          |
| Point            | 16384                |
| Frequency (Span) | 4500.45 Hz           |
| Scan             | 16                   |
| AcqTime          | 3.4983 s             |
| PD               | 1.502 s              |
| Pulse1           | 6.0 $\mu$ s          |
| Temperature      | 29.0 $^{\circ}$ C    |
| Solvent          | CDCl <sub>3</sub>    |
| Reference        | 0.0 ppm              |
| Broad. Factor    | 0.1373 Hz            |
| RGain            | 12                   |
| Printed          | 2011/Sep/03 19:58:06 |
| Operator         |                      |

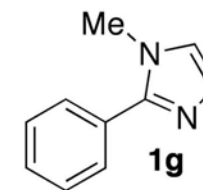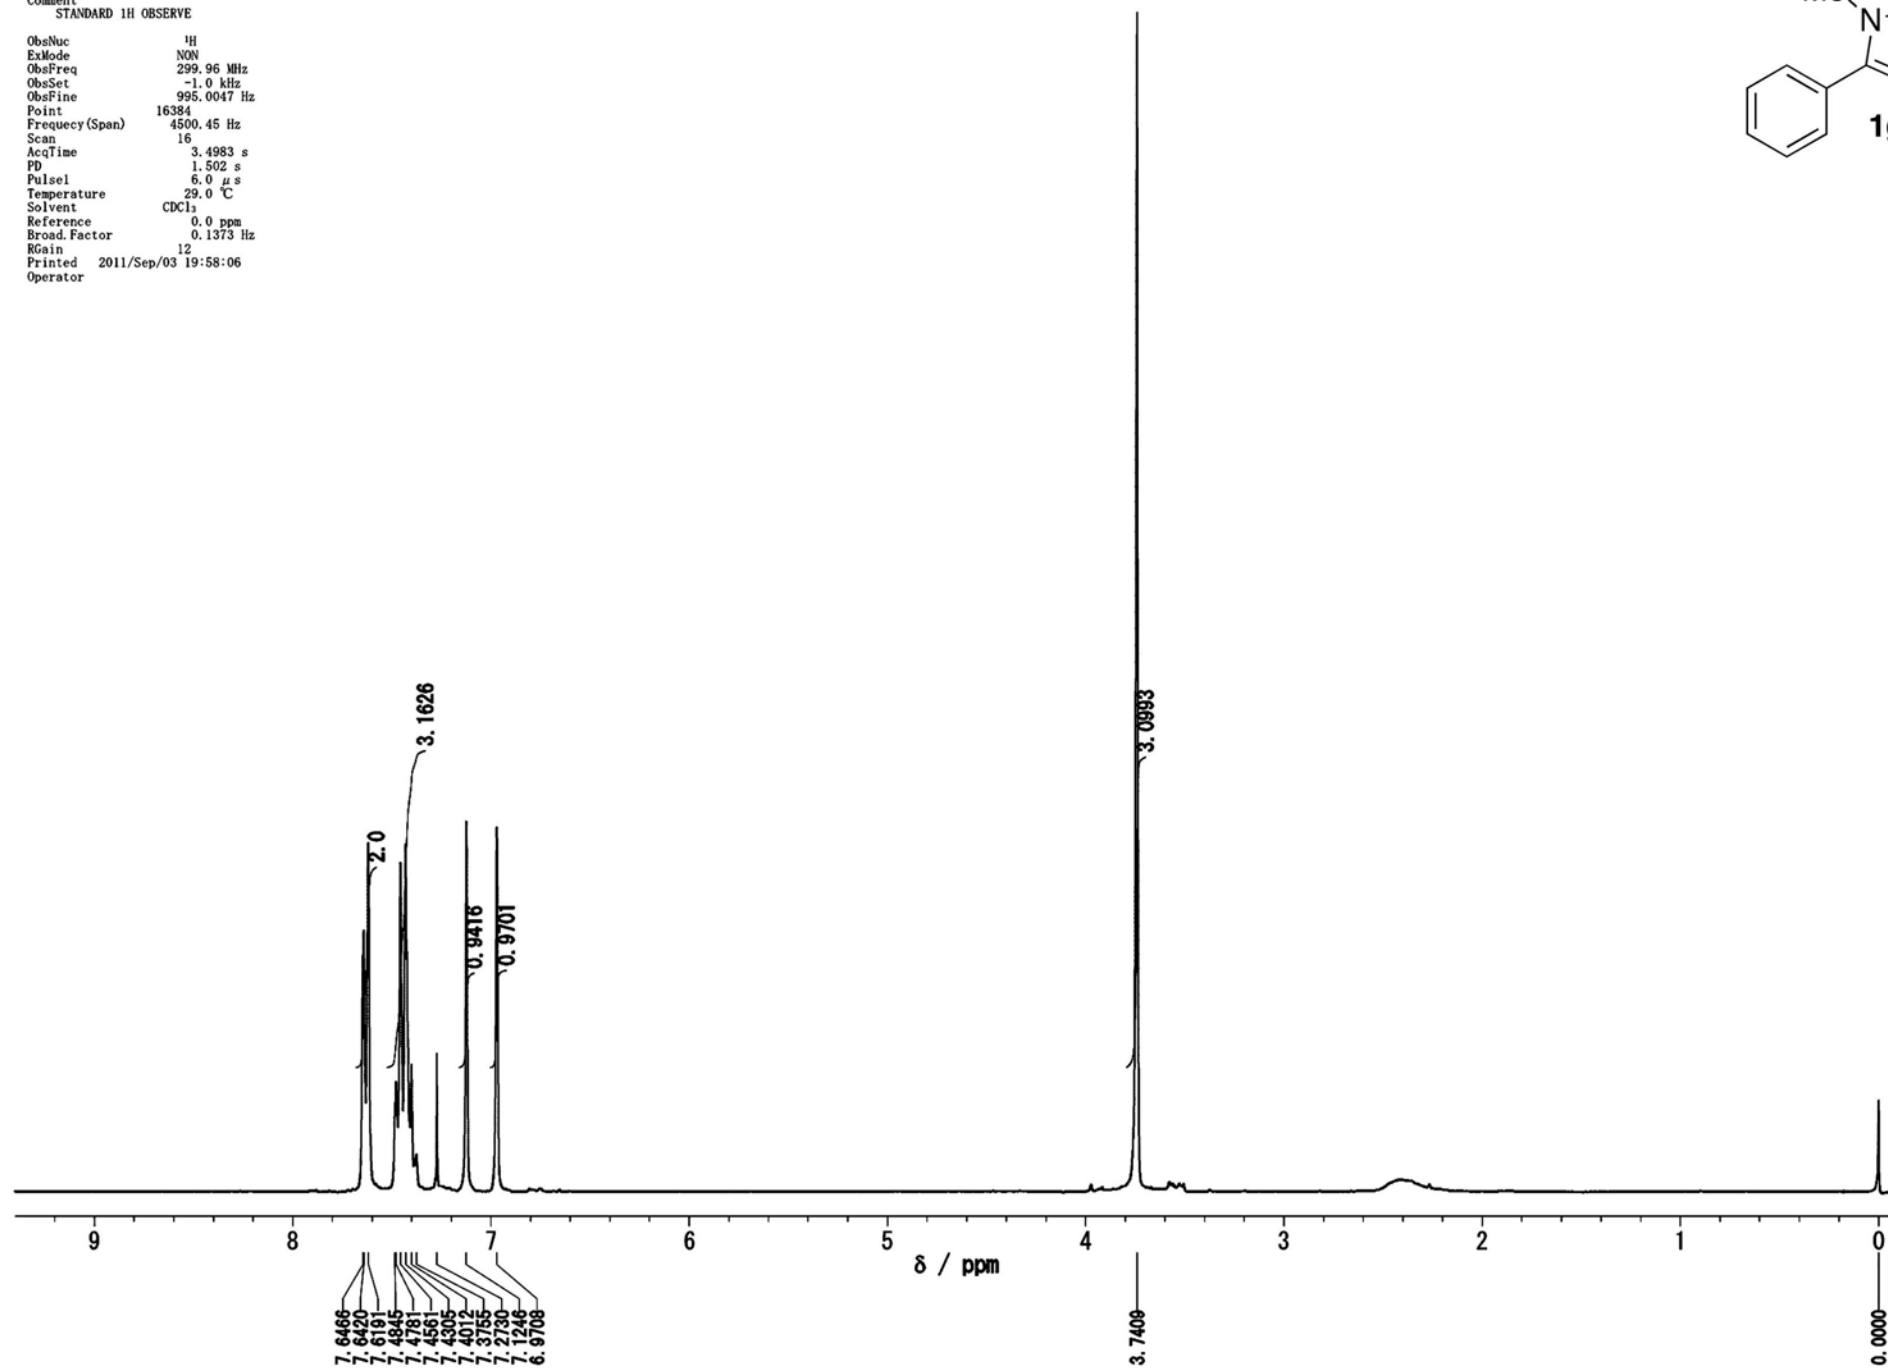

Original File:  
 Date Sep 2 11  
 Comment  
 C13 Statdard Observe  
 Stick=none Tune=6.4 Match=0.4

ObsNuc <sup>13</sup>C  
 ExMode NON  
 ObsFreq 75.43 MHz  
 ObsSet -1.0 kHz  
 ObsFine 996.3672 Hz  
 Point 32768  
 Frequency (Span) 18761.73 Hz  
 Scan 800  
 AcqTime 1.4992 s  
 PD 1.501 s  
 Pulsel 6.0  $\mu$ s  
 Temperature 29.0  $^{\circ}$ C  
 Solvent CDCl<sub>3</sub>  
 Reference 77.0 ppm  
 Broad.Factor 0.2863 Hz  
 RGain 30  
 Printed 2011/Sep/03 19:59:09  
 Operator

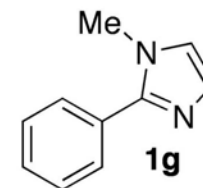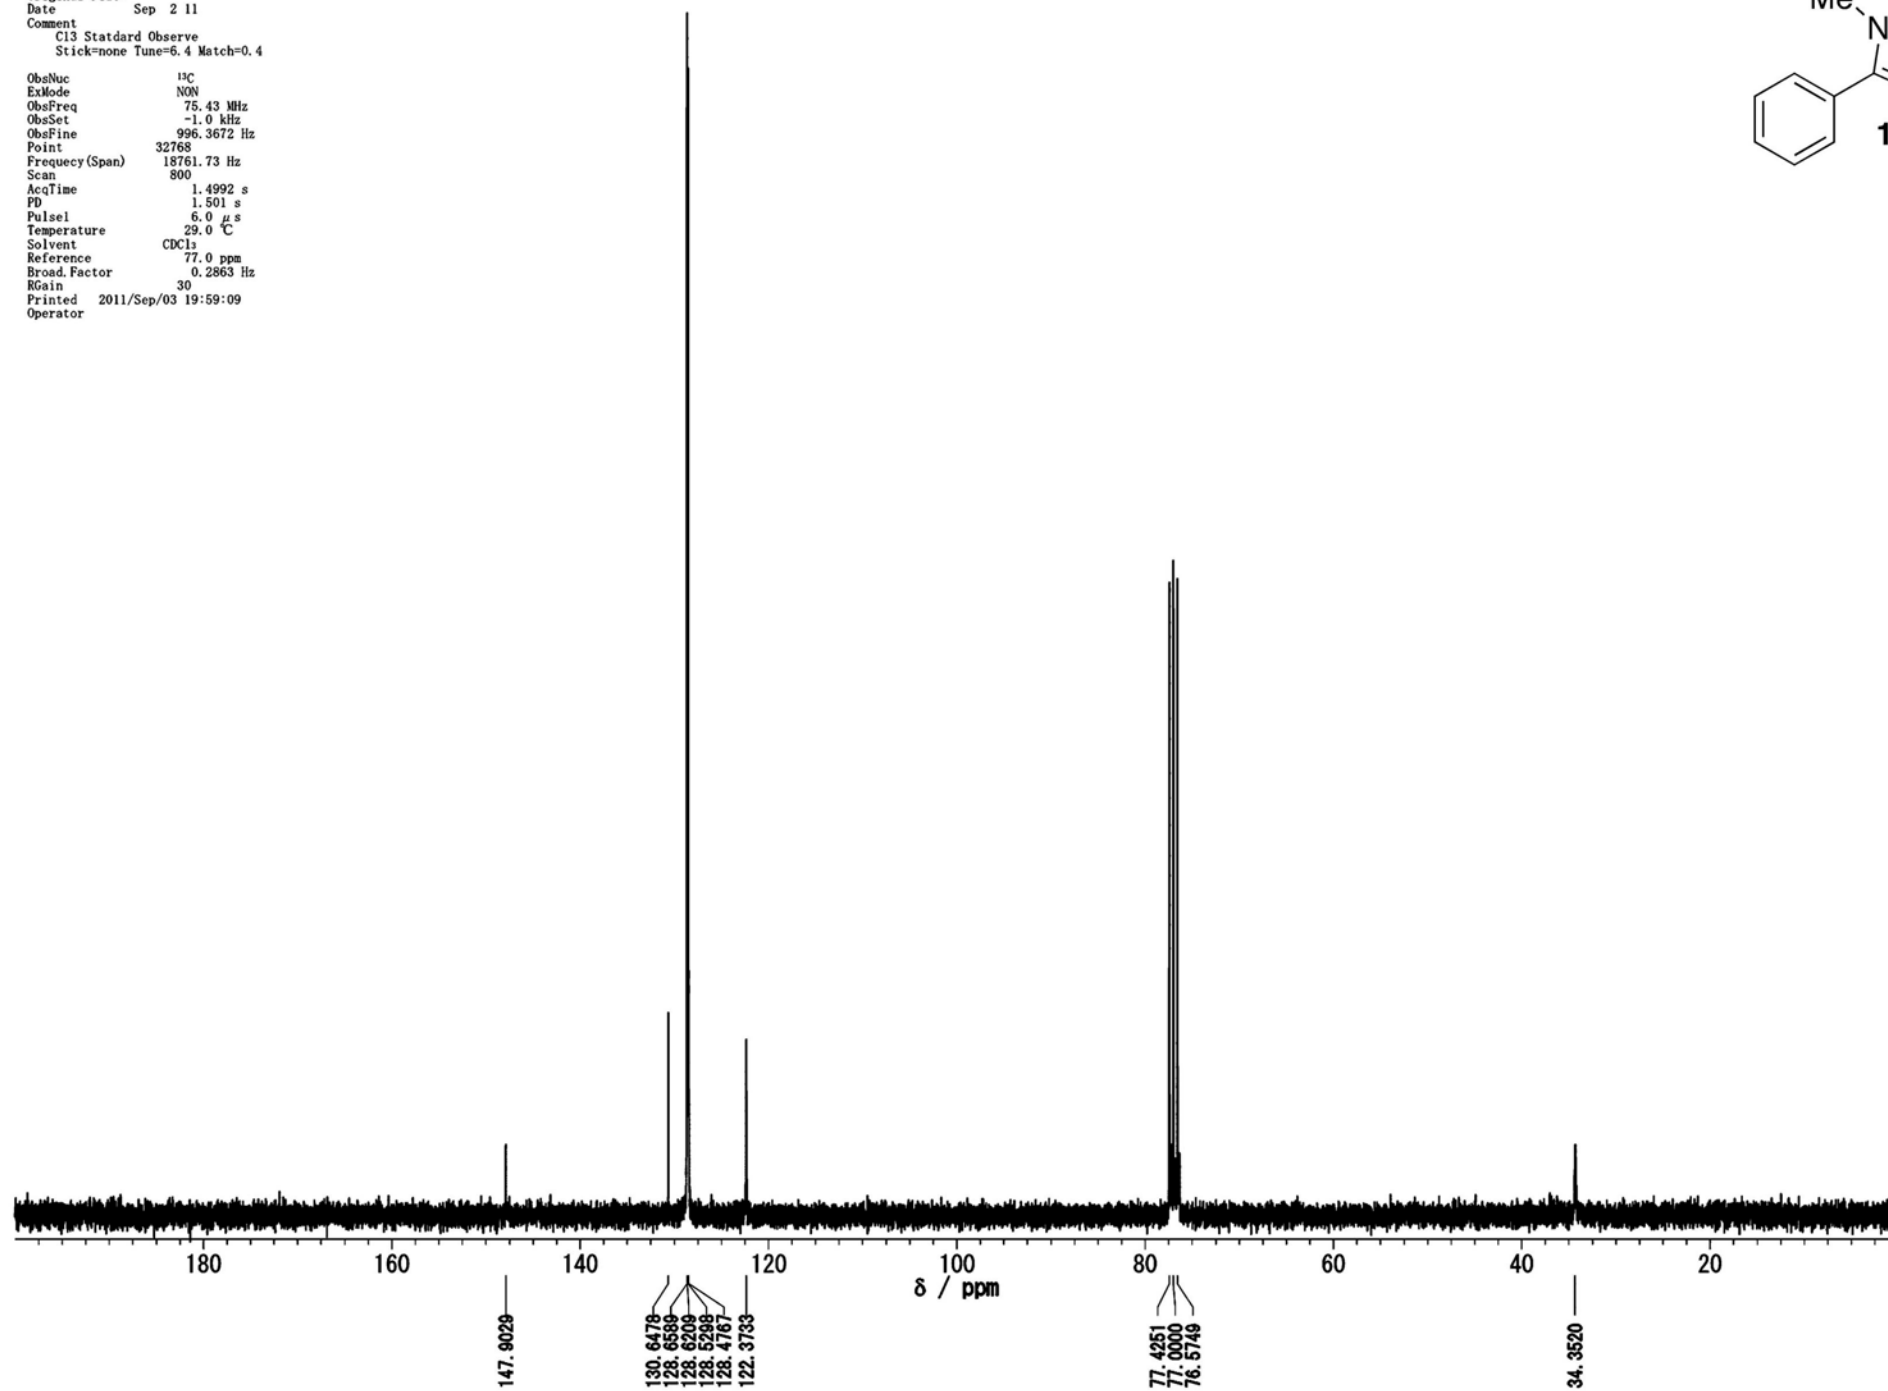

Original File:  
 Date Sep 2 11  
 Comment  
 STANDARD 1H OBSERVE

|                  |                      |
|------------------|----------------------|
| ObsNuc           | <sup>1</sup> H       |
| ExMode           | NON                  |
| ObsFreq          | 299.96 MHz           |
| ObsSet           | -1.0 kHz             |
| ObsPine          | 995.0047 Hz          |
| Point            | 16384                |
| Frequency (Span) | 4500.45 Hz           |
| Scan             | 16                   |
| AcqTime          | 3.4983 s             |
| PD               | 1.502 s              |
| Pulse1           | 6.0 $\mu$ s          |
| Temperature      | 29.0 $^{\circ}$ C    |
| Solvent          | CDCl <sub>3</sub>    |
| Reference        | 0.0 ppm              |
| Broad. Factor    | 0.1373 Hz            |
| RGain            | 24                   |
| Printed          | 2011/Sep/03 20:00:01 |
| Operator         |                      |

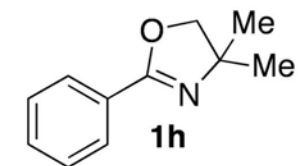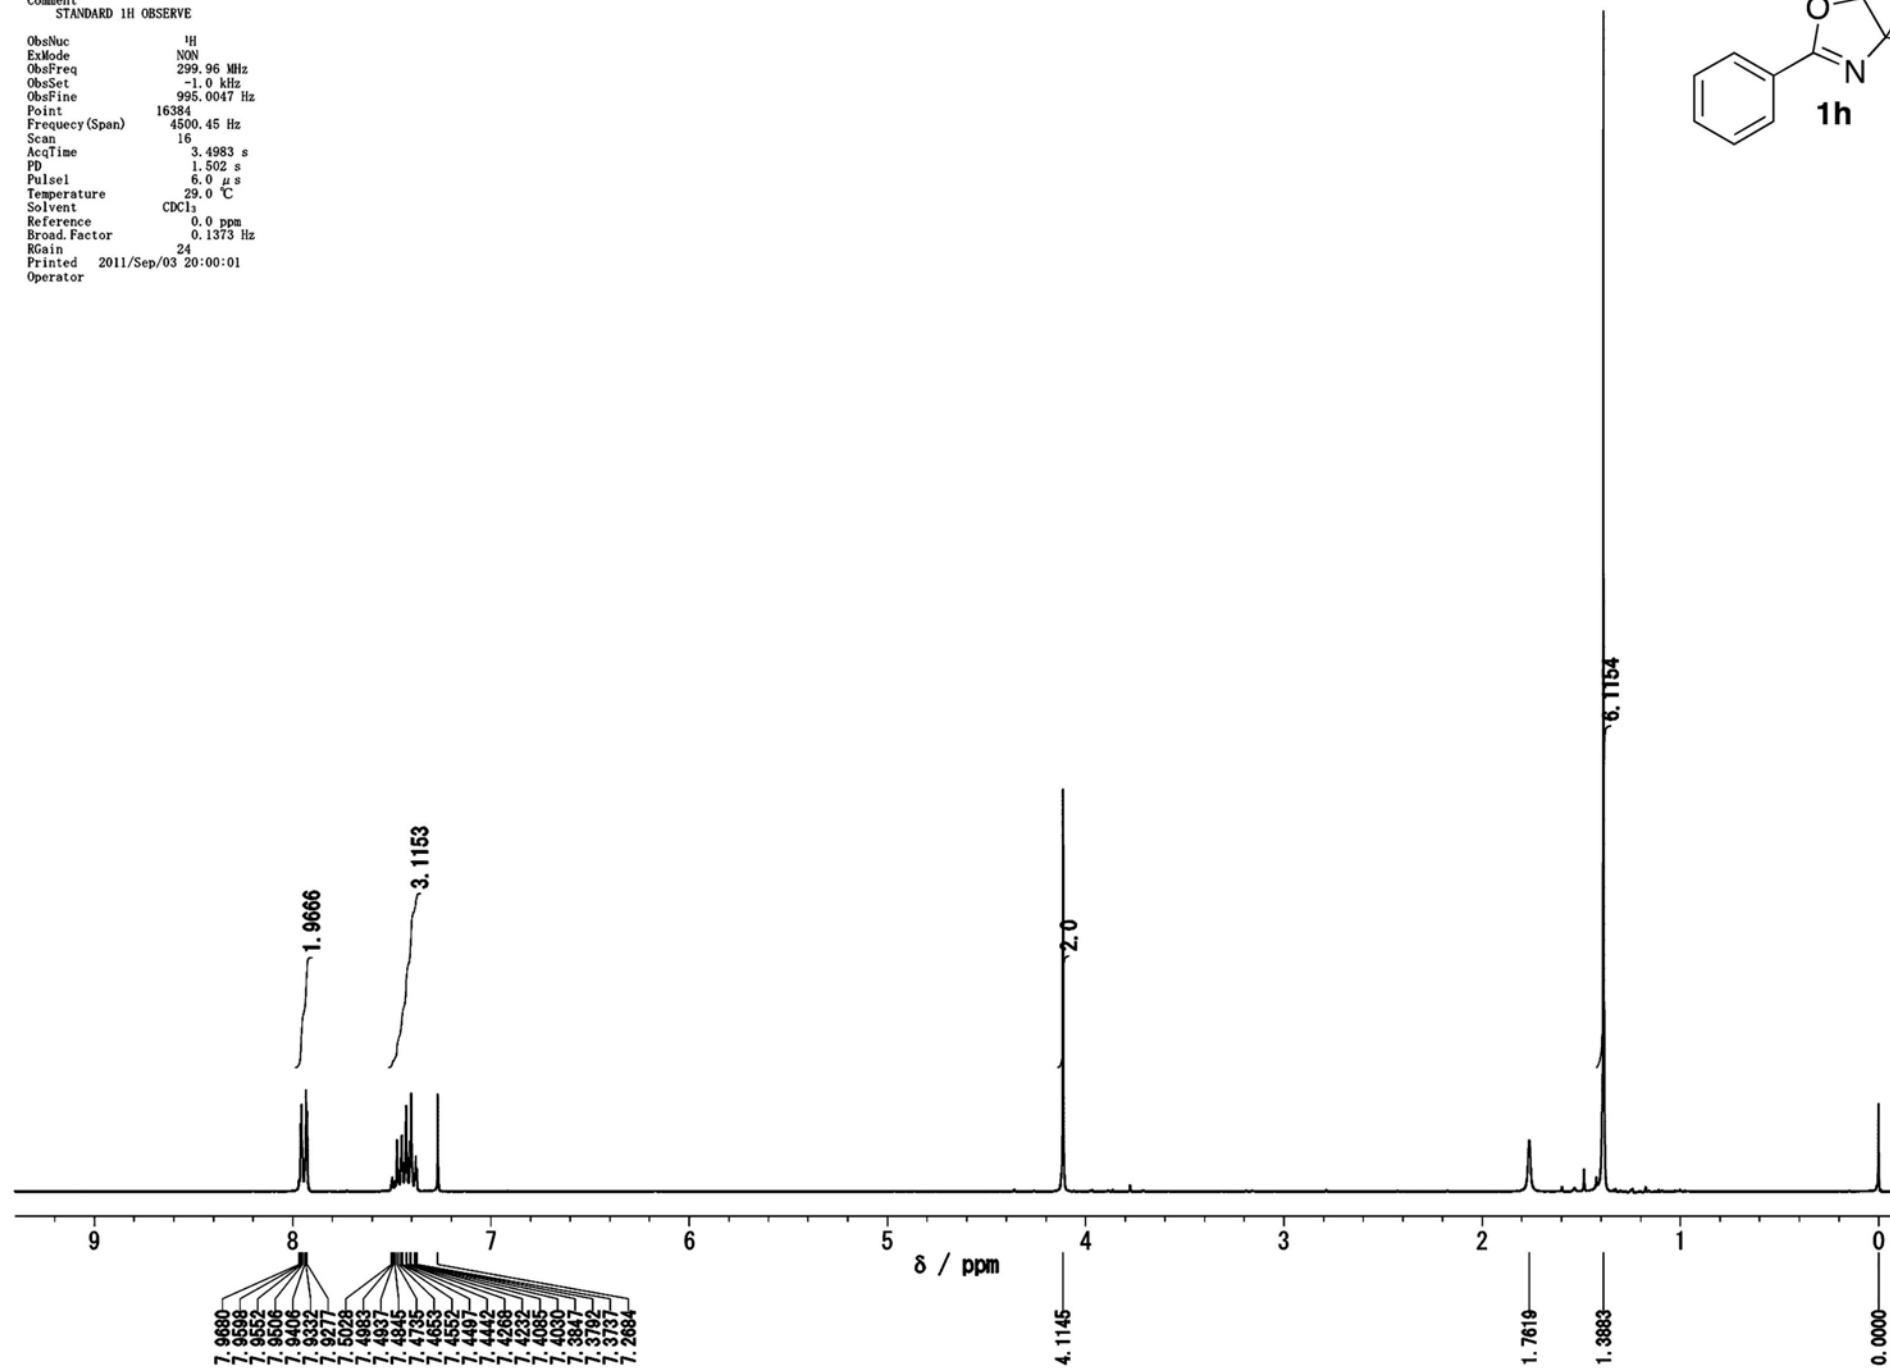

Original File:  
 Date Sep 2 11  
 Comment  
 C13 Statdard Observe  
 Stick=none Tune=6.4 Match=0.4

ObsNuc <sup>13</sup>C  
 ExMode NON  
 ObsFreq 75.43 MHz  
 ObsSet -1.0 kHz  
 ObsFine 996.3672 Hz  
 Point 32768  
 Frequency (Span) 18761.73 Hz  
 Scan 128  
 AcqTime 1.4992 s  
 PD 1.501 s  
 Pulsel 6.0  $\mu$ s  
 Temperature 29.0  $^{\circ}$ C  
 Solvent CDCl<sub>3</sub>  
 Reference 77.0 ppm  
 Broad Factor 0.2863 Hz  
 RGain 30  
 Printed 2011/Sep/03 20:01:03  
 Operator

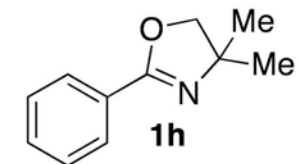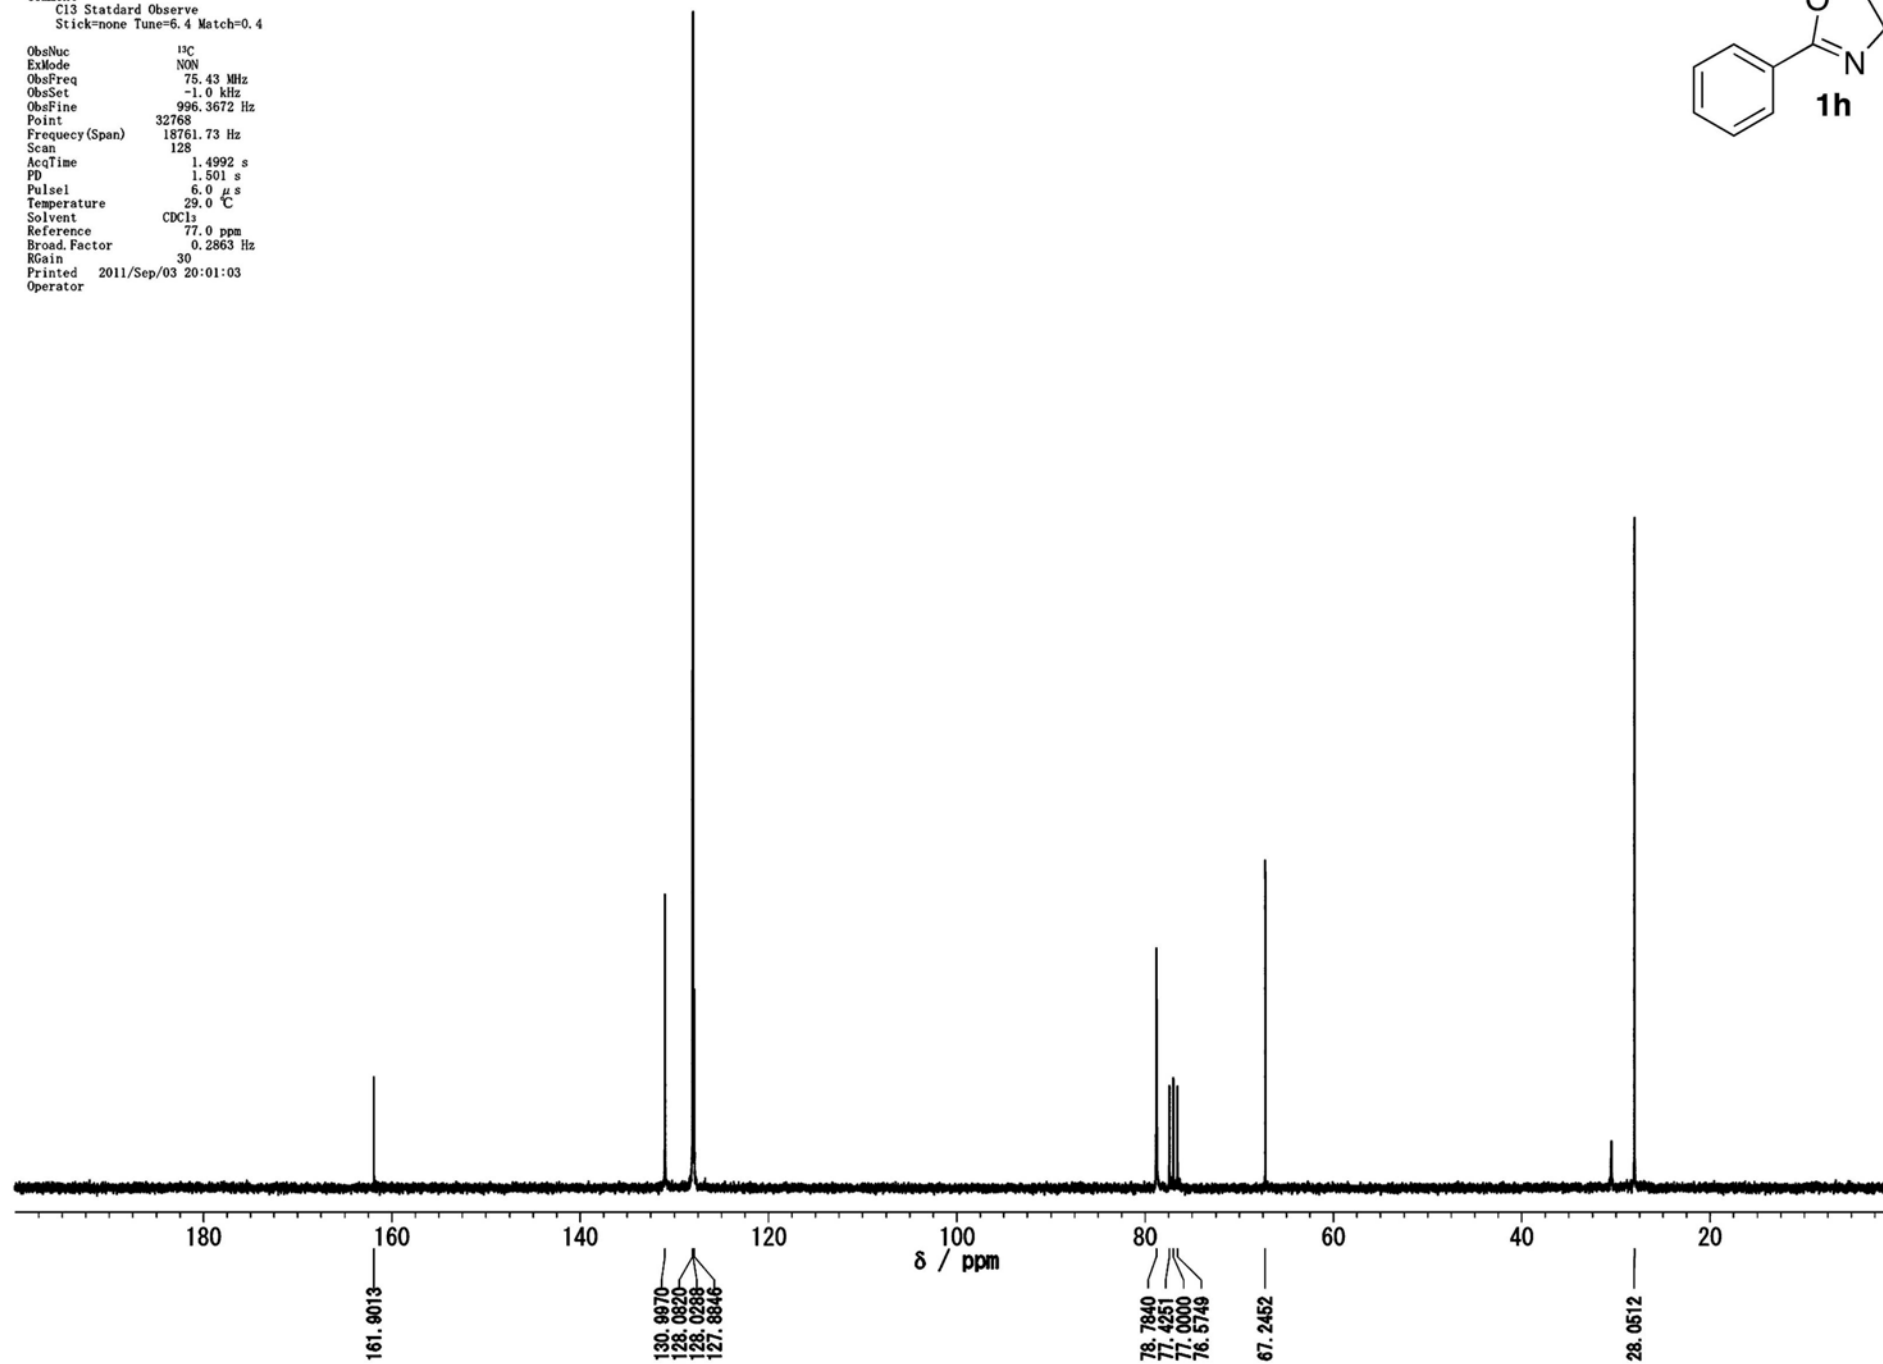

Original File:  
 Date Aug 23 11  
 Comment  
 STANDARD 1H OBSERVE

|                  |                      |
|------------------|----------------------|
| ObsNuc           | <sup>1</sup> H       |
| ExMode           | NON                  |
| ObsFreq          | 299.96 MHz           |
| ObsSet           | -1.0 kHz             |
| ObsPine          | 995.0047 Hz          |
| Point            | 16384                |
| Frequency (Span) | 4500.45 Hz           |
| Scan             | 16                   |
| AcqTime          | 3.4983 s             |
| PD               | 1.502 s              |
| Pulse1           | 6.0 μs               |
| Temperature      | 29.0 °C              |
| Solvent          | CDCl <sub>3</sub>    |
| Reference        | 0.0 ppm              |
| Broad. Factor    | 0.1373 Hz            |
| RGain            | 29                   |
| Printed          | 2011/Sep/03 20:02:31 |
| Operator         |                      |

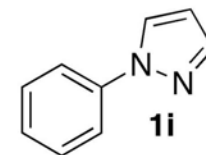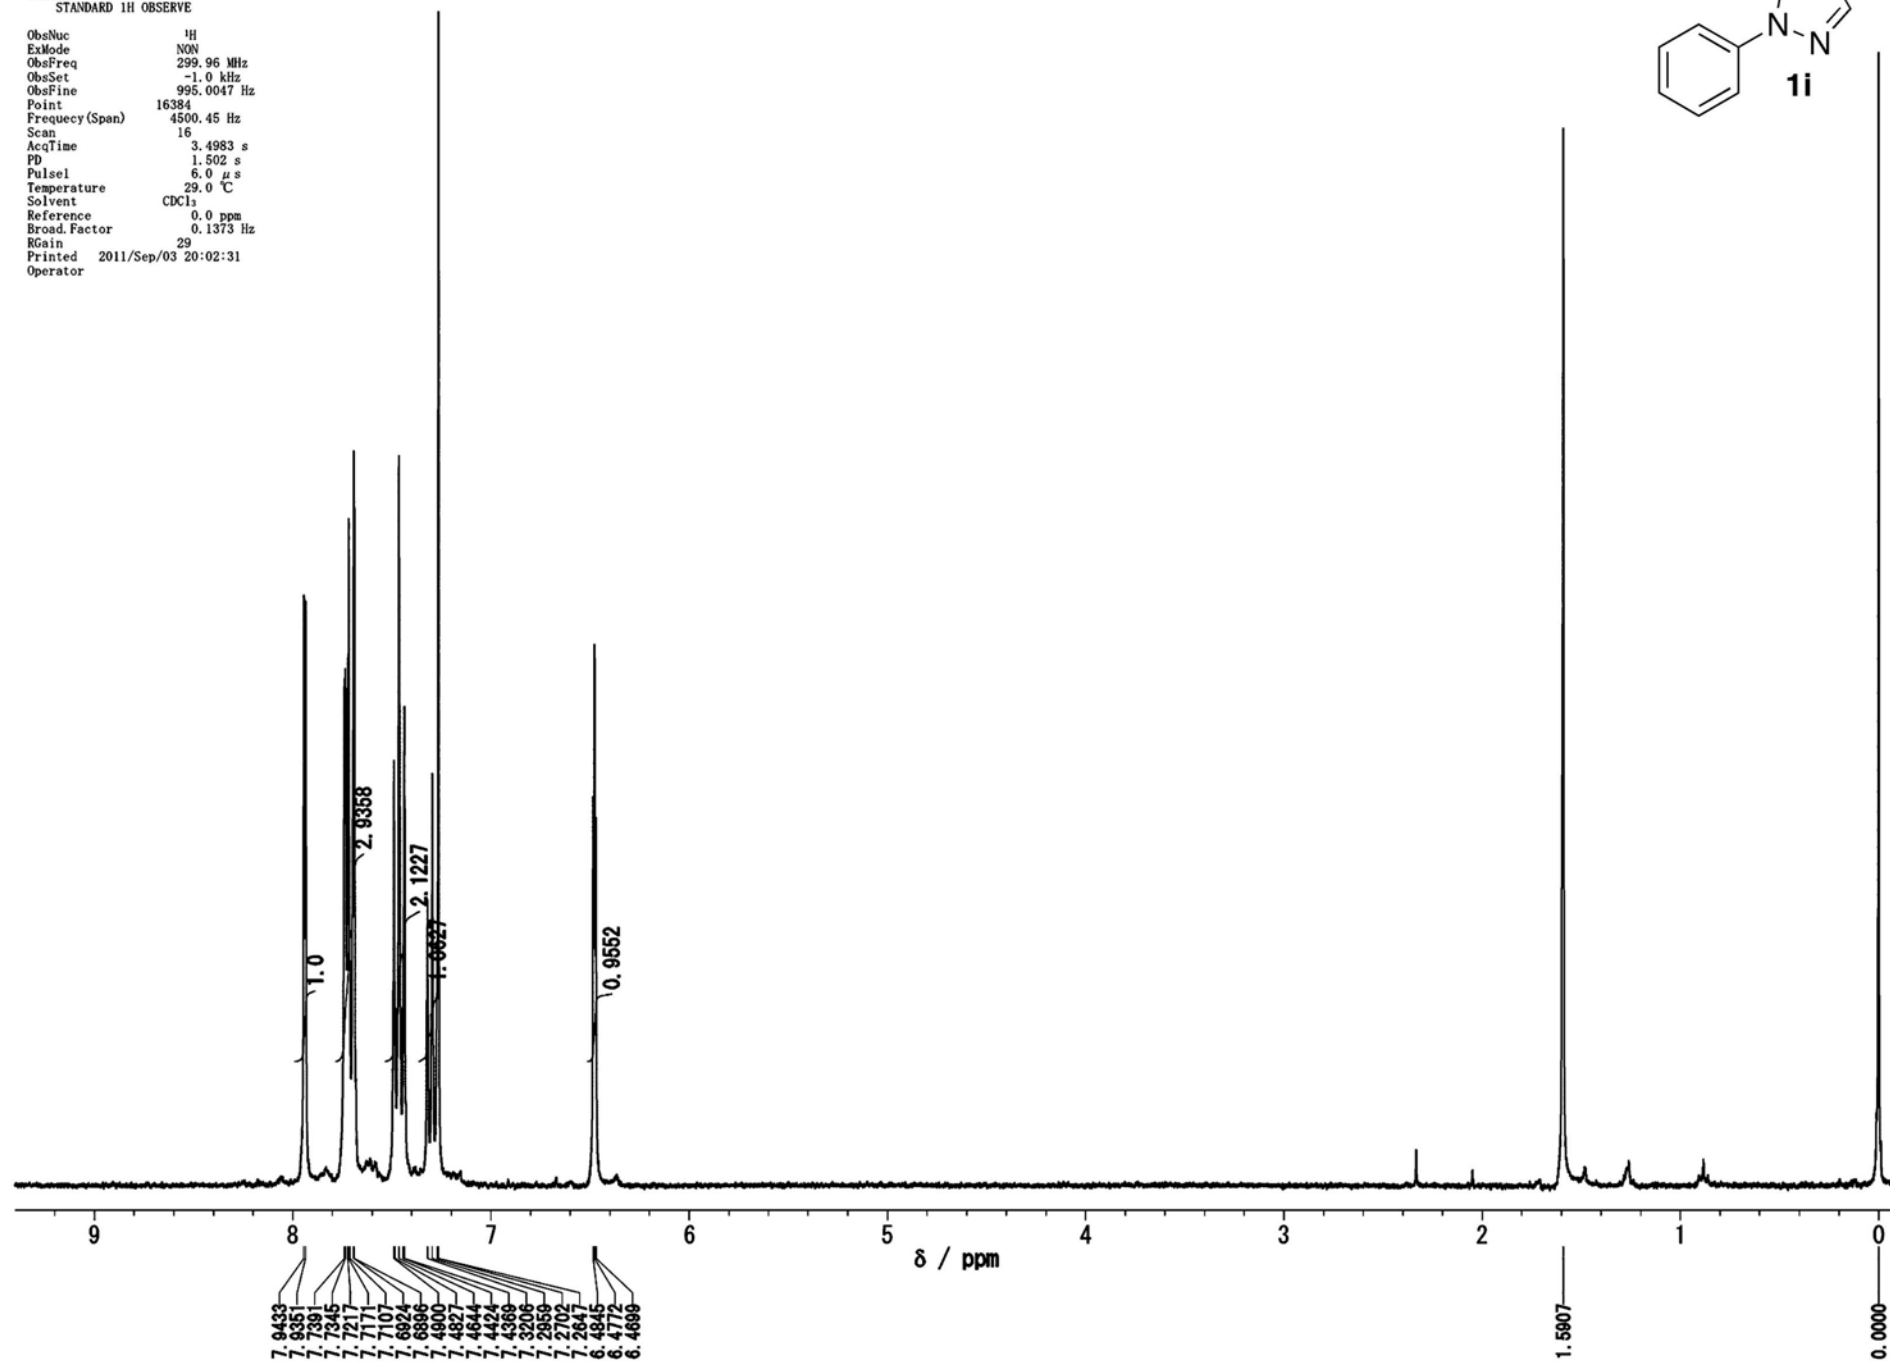

Original File:  
Date Sep 2 11  
Comment  
C13 Statdard Observe  
Stick=none Tune=6.4 Match=0.4

ObsNuc <sup>13</sup>C  
ExMode NON  
ObsFreq 75.43 MHz  
ObsSet -1.0 kHz  
ObsFine 996.3672 Hz  
Point 32768  
Frequency (Span) 18761.73 Hz  
Scan 128  
AcqTime 1.4992 s  
PD 1.501 s  
Pulse 6.0  $\mu$ s  
Temperature 29.0  $^{\circ}$ C  
Solvent CDCl<sub>3</sub>  
Reference 77.0 ppm  
Broad Factor 0.2863 Hz  
RGain 30  
Printed 2011/Sep/03 20:03:14  
Operator

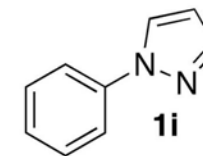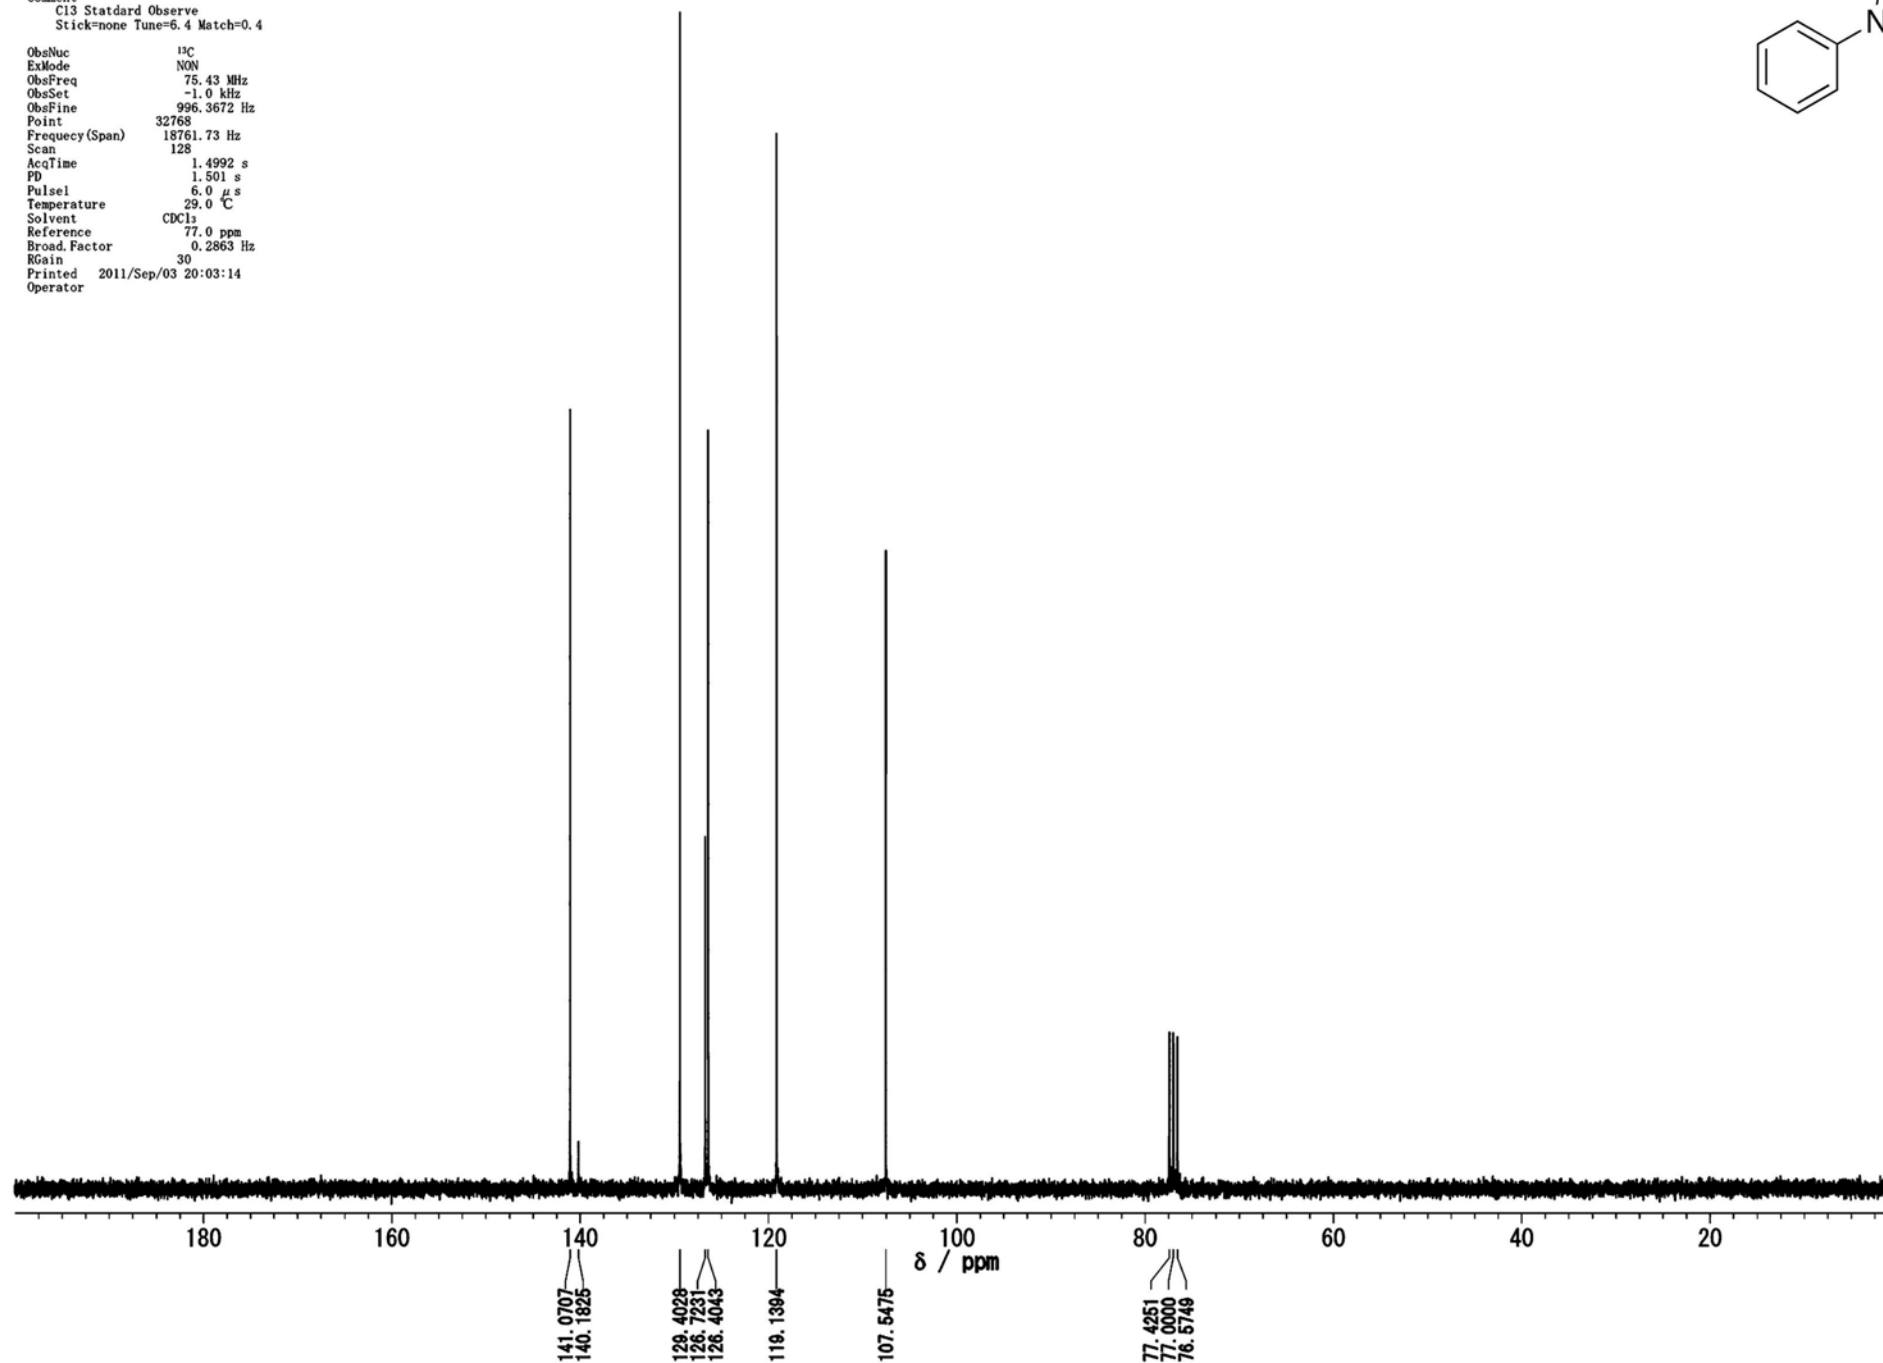

Original File: Jun 23 11  
 Date  
 Comment  
 STANDARD 1H OBSERVE

|                  |                      |
|------------------|----------------------|
| ObsNuc           | <sup>1</sup> H       |
| ExMode           | NON                  |
| ObsFreq          | 299.96 MHz           |
| ObsSet           | -1.0 kHz             |
| ObsPine          | 995.0047 Hz          |
| Point            | 16384                |
| Frequency (Span) | 4500.45 Hz           |
| Scan             | 16                   |
| AcqTime          | 3.4983 s             |
| PD               | 1.502 s              |
| Pulse1           | 6.0 $\mu$ s          |
| Temperature      | 29.0 $^{\circ}$ C    |
| Solvent          | CDCl <sub>3</sub>    |
| Reference        | 0.0 ppm              |
| Broad. Factor    | 0.1373 Hz            |
| RGain            | 29                   |
| Printed          | 2011/Sep/03 20:03:57 |
| Operator         |                      |

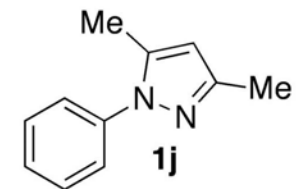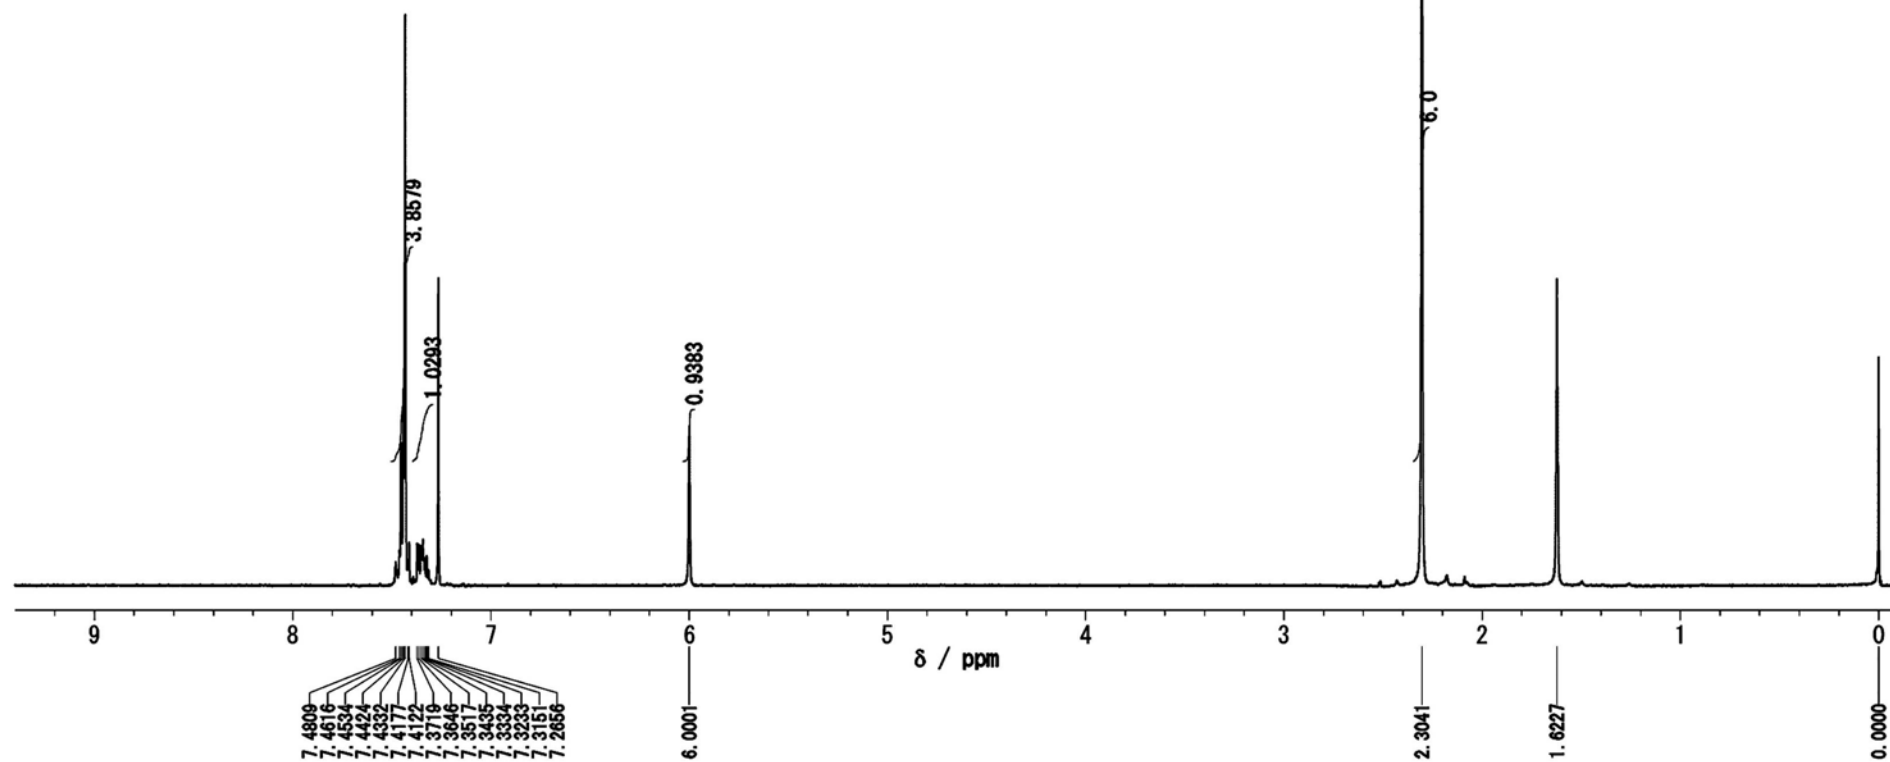

Original File:  
 Date Sep 3 11  
 Comment  
 C13 Statdard Observe  
 Stick=none Tune=6.4 Match=0.4  
 ObsNuc <sup>13</sup>C  
 ExMode NON  
 ObsFreq 75.43 MHz  
 ObsSet -1.0 kHz  
 ObsFine 996.3672 Hz  
 Point 32768  
 Frequency (Span) 18761.73 Hz  
 Scan 192  
 AcqTime 1.4992 s  
 PD 1.501 s  
 Pulsel 6.0  $\mu$ s  
 Temperature 29.0  $^{\circ}$ C  
 Solvent CDCl<sub>3</sub>  
 Reference 77.0 ppm  
 Broad.Factor 0.2863 Hz  
 RGain 30  
 Printed 2011/Sep/03 20:04:44  
 Operator

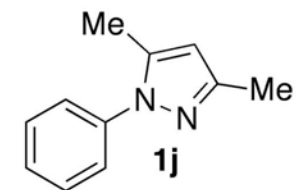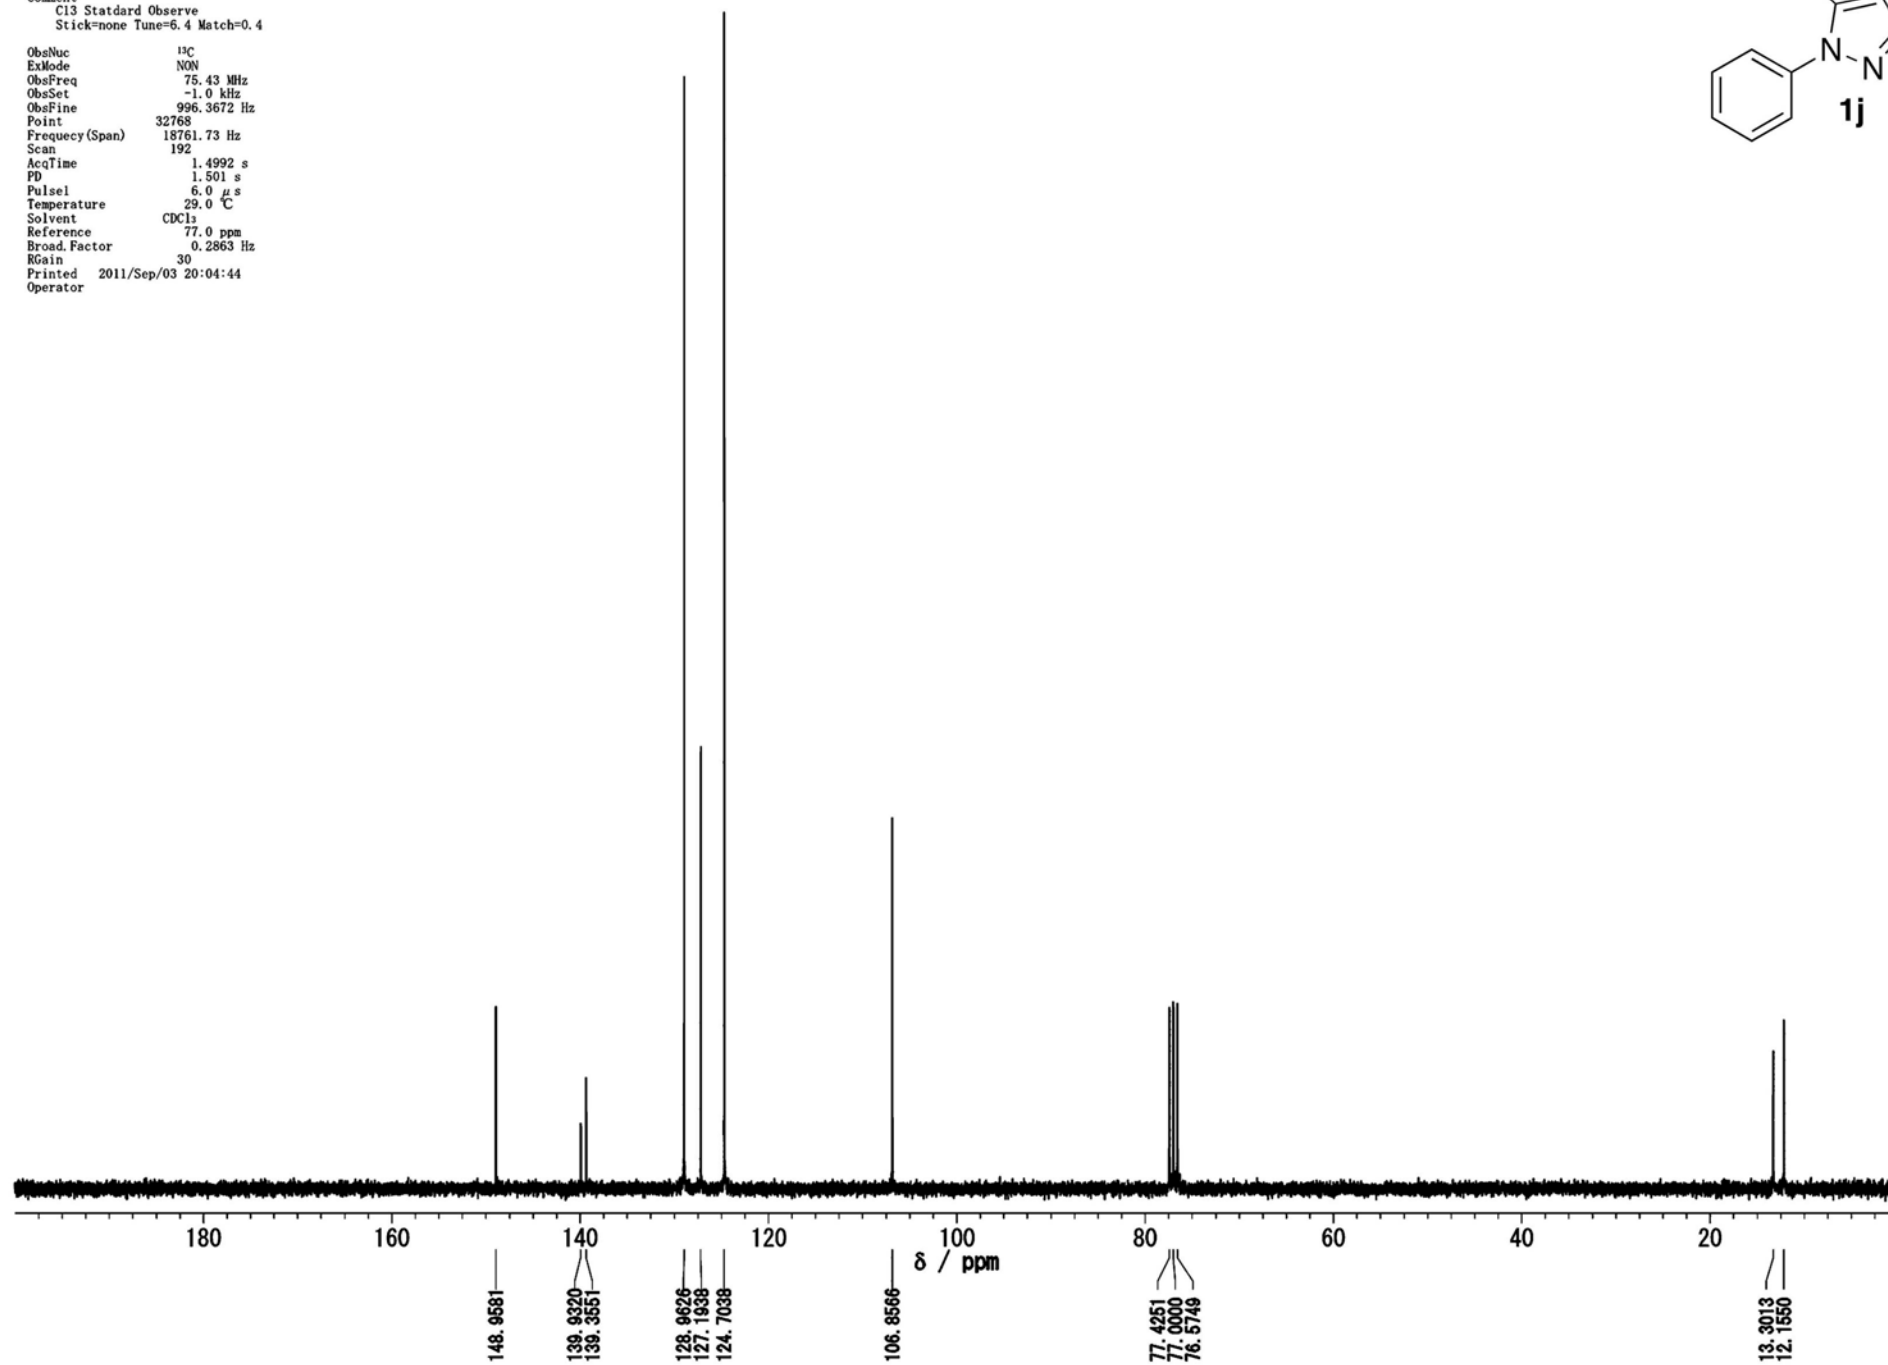



Original File:  
 Date Sep 2 11  
 Comment  
 STANDARD 1H OBSERVE

|                  |                      |
|------------------|----------------------|
| ObsNuc           | 1H                   |
| ExMode           | NON                  |
| ObsFreq          | 299.96 MHz           |
| ObsSet           | -1.0 kHz             |
| ObsPine          | 995.0047 Hz          |
| Point            | 16384                |
| Frequency (Span) | 4500.45 Hz           |
| Scan             | 16                   |
| AcqTime          | 3.4983 s             |
| PD               | 1.502 s              |
| Pulse1           | 6.0 $\mu$ s          |
| Temperature      | 29.0 $^{\circ}$ C    |
| Solvent          | CDCl <sub>3</sub>    |
| Reference        | 0.0 ppm              |
| Broad.Factor     | 0.1373 Hz            |
| RGain            | 12                   |
| Printed          | 2011/Sep/03 20:05:29 |
| Operator         |                      |

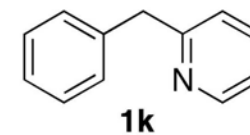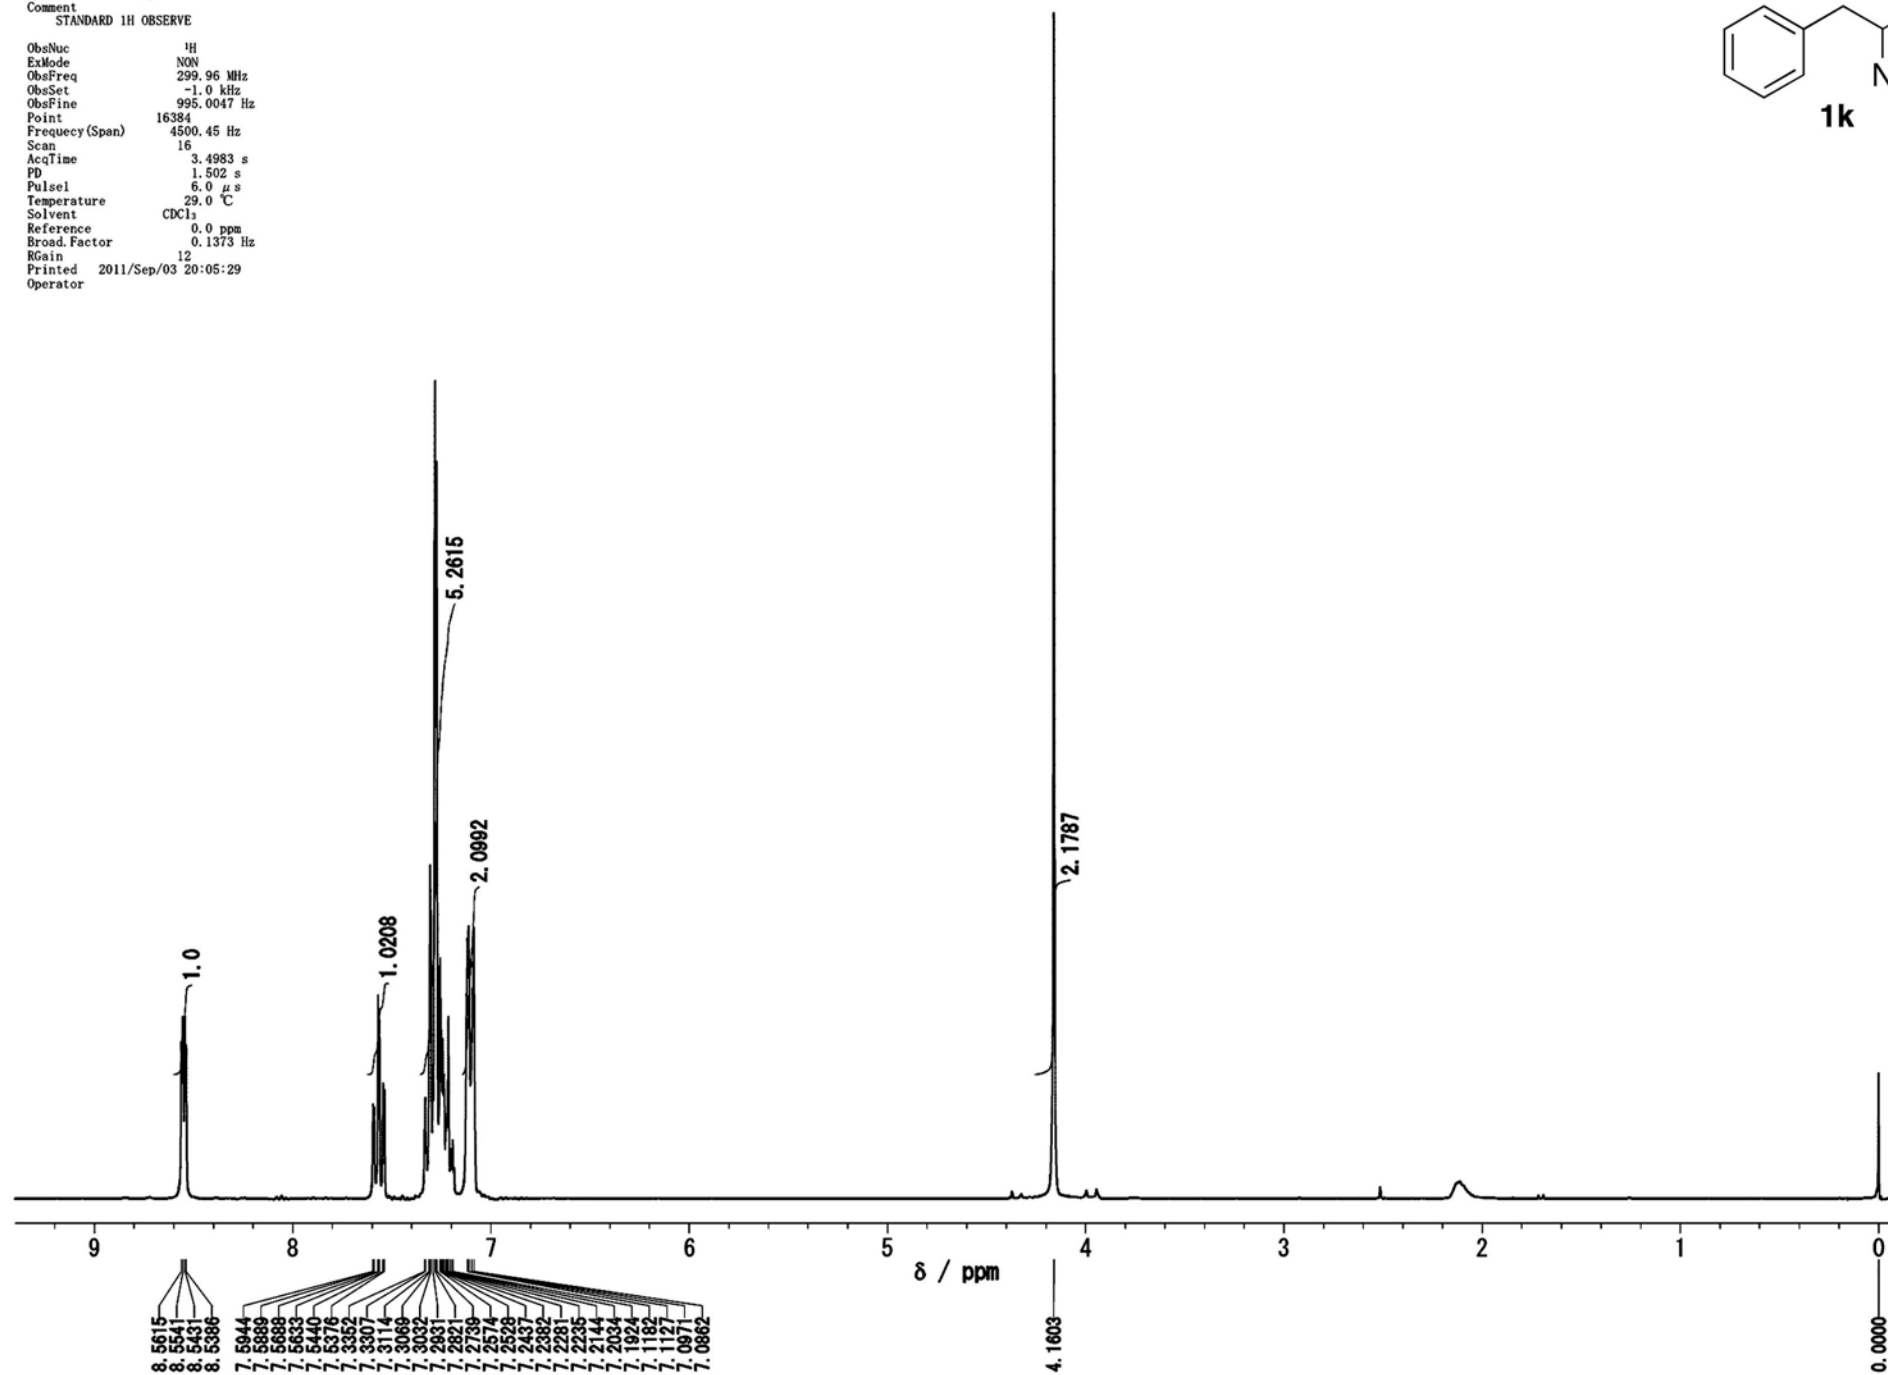

Original File:  
 Date Sep 2 11  
 Comment  
 C13 Statdard Observe  
 Stick=none Tune=6.4 Match=0.4

ObsNuc  $^{13}\text{C}$   
 ExMode NON  
 ObsFreq 75.43 MHz  
 ObsSet -1.0 kHz  
 ObsFine 996.3672 Hz  
 Point 32768  
 Frequency (Span) 18761.73 Hz  
 Scan 128  
 AcqTime 1.4992 s  
 PD 1.501 s  
 Pulsel 6.0  $\mu\text{s}$   
 Temperature 29.0  $^{\circ}\text{C}$   
 Solvent  $\text{CDCl}_3$   
 Reference 77.0 ppm  
 Broad.Factor 0.2863 Hz  
 RGain 30  
 Printed 2011/Sep/03 20:06:14  
 Operator

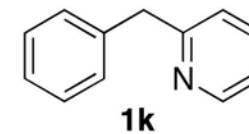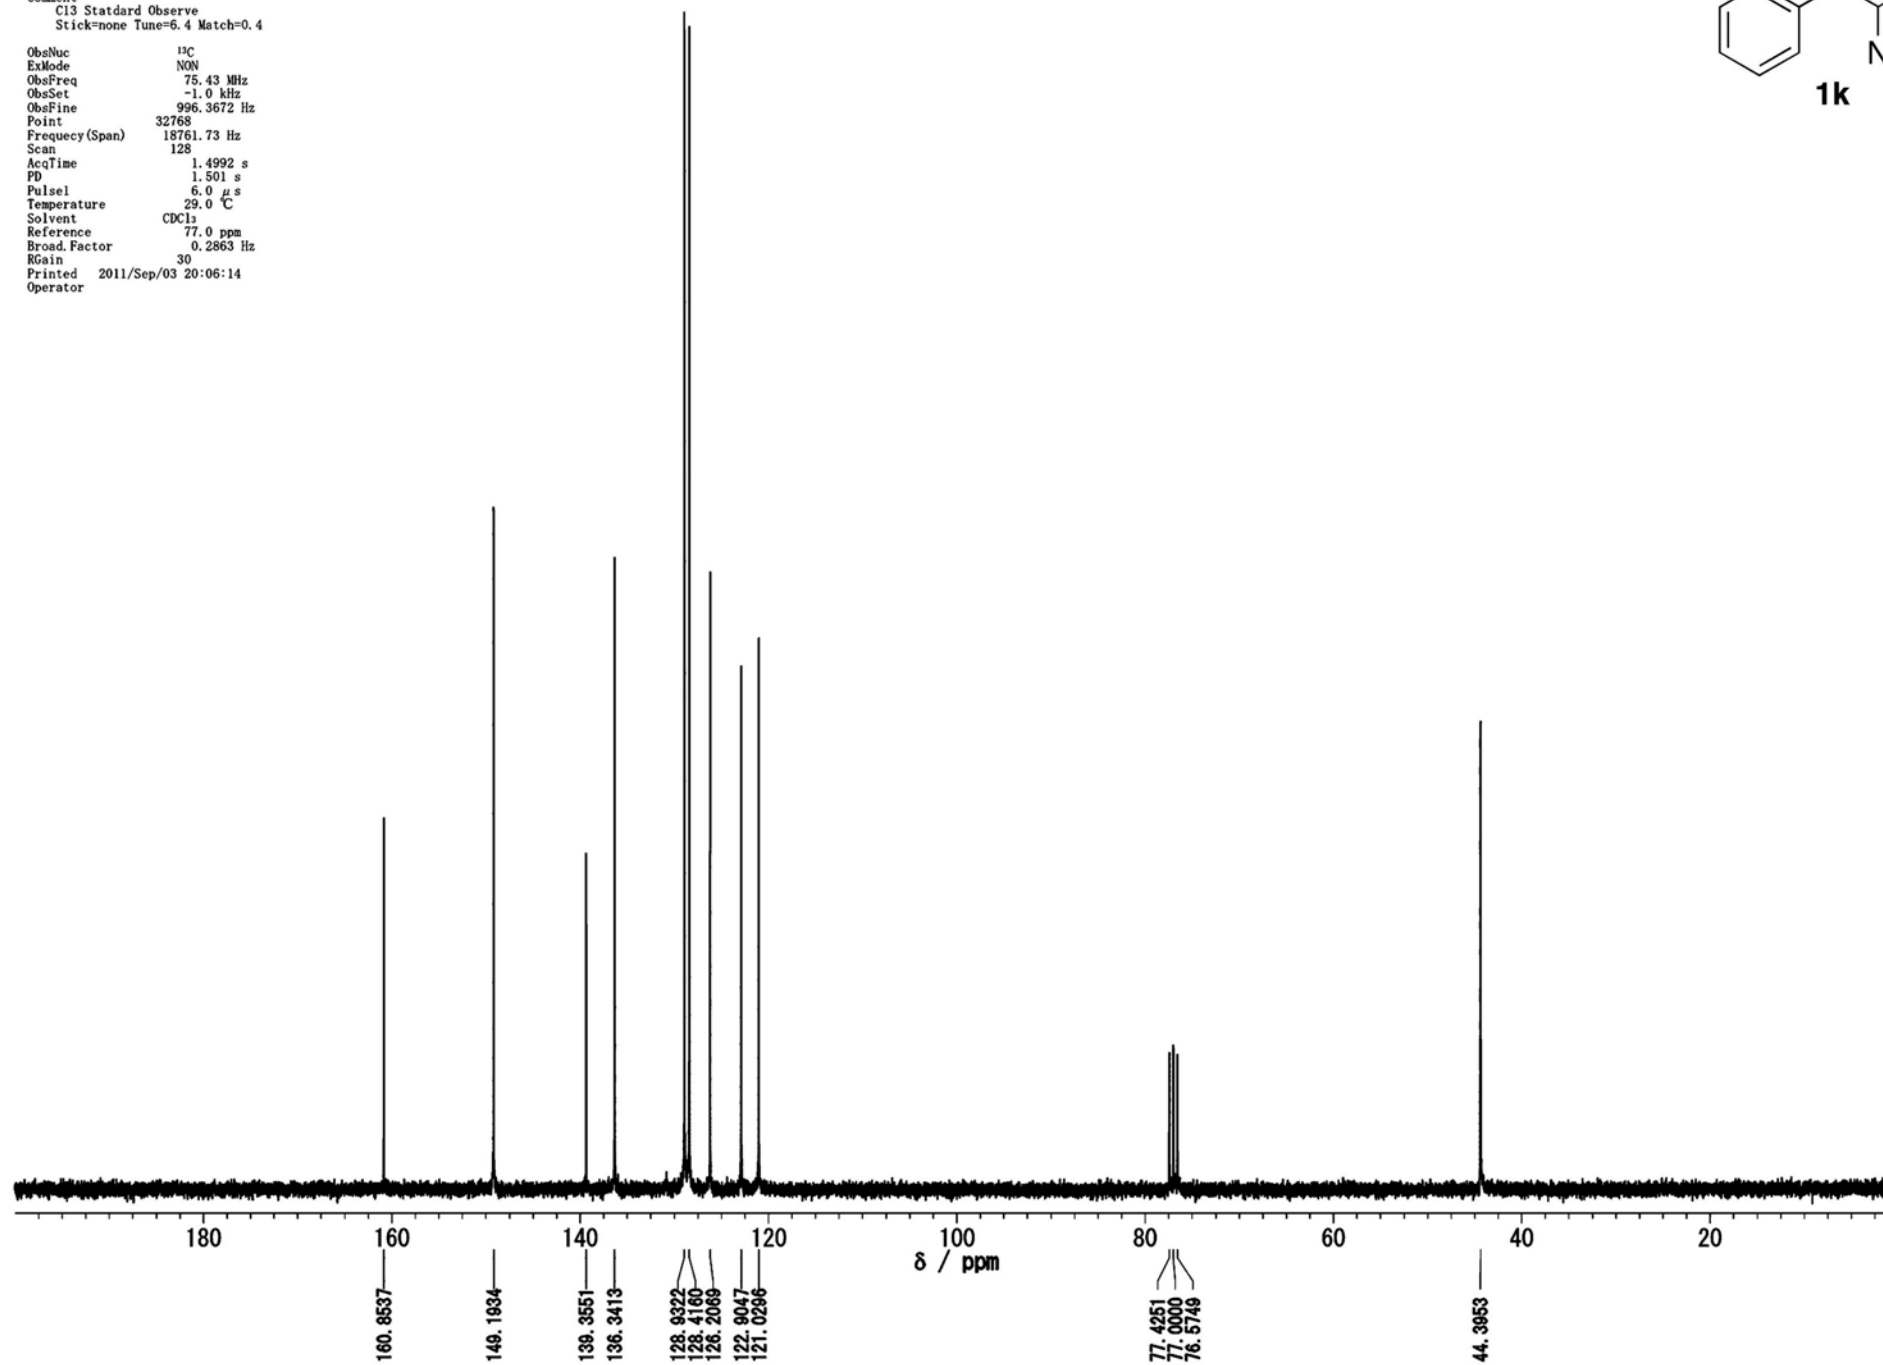

Original File: Jun 21 11  
 Date: Jun 21 11  
 Comment: STANDARD 1H OBSERVE  
 ObsNuc: <sup>1</sup>H  
 ExMode: NON  
 ObsFreq: 299.96 MHz  
 ObsSet: -1.0 kHz  
 ObsPine: 995.0047 Hz  
 Point: 16384  
 Frequency (Span): 4500.45 Hz  
 Scan: 16  
 AcqTime: 3.4983 s  
 PD: 1.502 s  
 Pulse1: 6.0  $\mu$ s  
 Temperature: 29.0  $^{\circ}$ C  
 Solvent: CDCl<sub>3</sub>  
 Reference: 0.0 ppm  
 Broad Factor: 0.1373 Hz  
 RGain: 29  
 Printed: 2011/Sep/03 20:07:16  
 Operator:

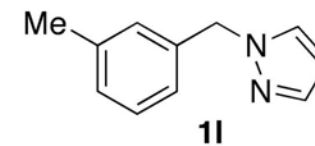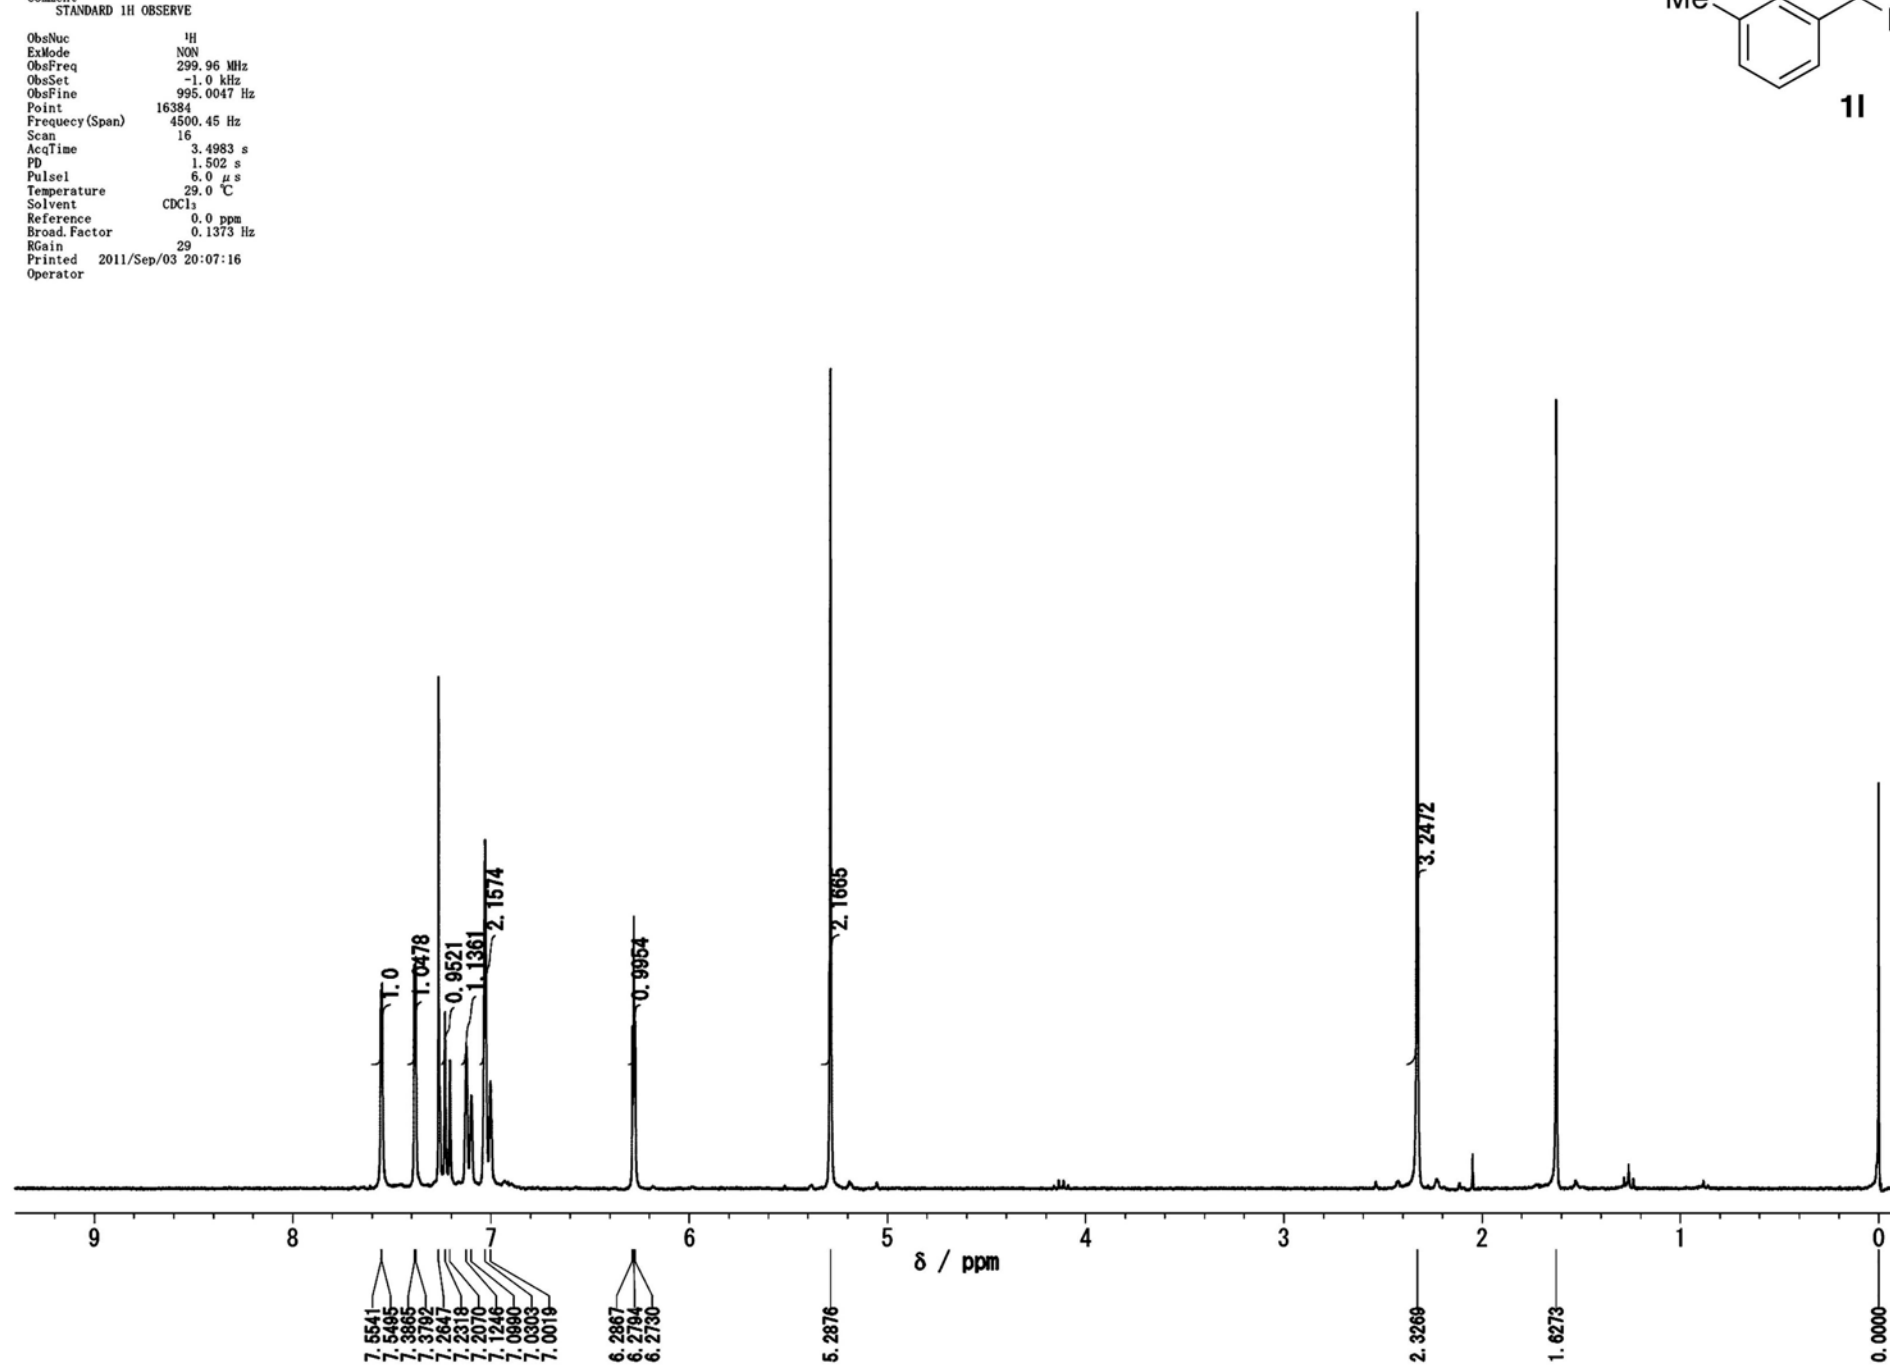

Date Aug 30 11  
 Comment C13 Statdard Observe  
 Stick=none Tune=6.4 Match=0.4  
 ObsNuc <sup>13</sup>C  
 ExMode NQV  
 ObsFreq 75.43 MHz  
 ObsSet -1.0 kHz  
 ObsFine 996.3672 Hz  
 Point 32768  
 Frequency (Span) 18761.73 Hz  
 Scan 128  
 AcqTime 1.4992 s  
 PD 1.501 s  
 Pulse 6.0  $\mu$ s  
 Temperature 29.0  $^{\circ}$ C  
 Solvent CDCl<sub>3</sub>  
 Reference 77.0 ppm  
 Broad. Factor 0.25 Hz  
 RGain 30  
 Printed 2011/Sep/03 20:09:53  
 Operator

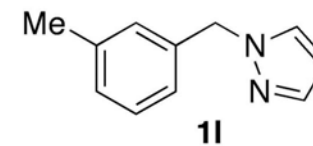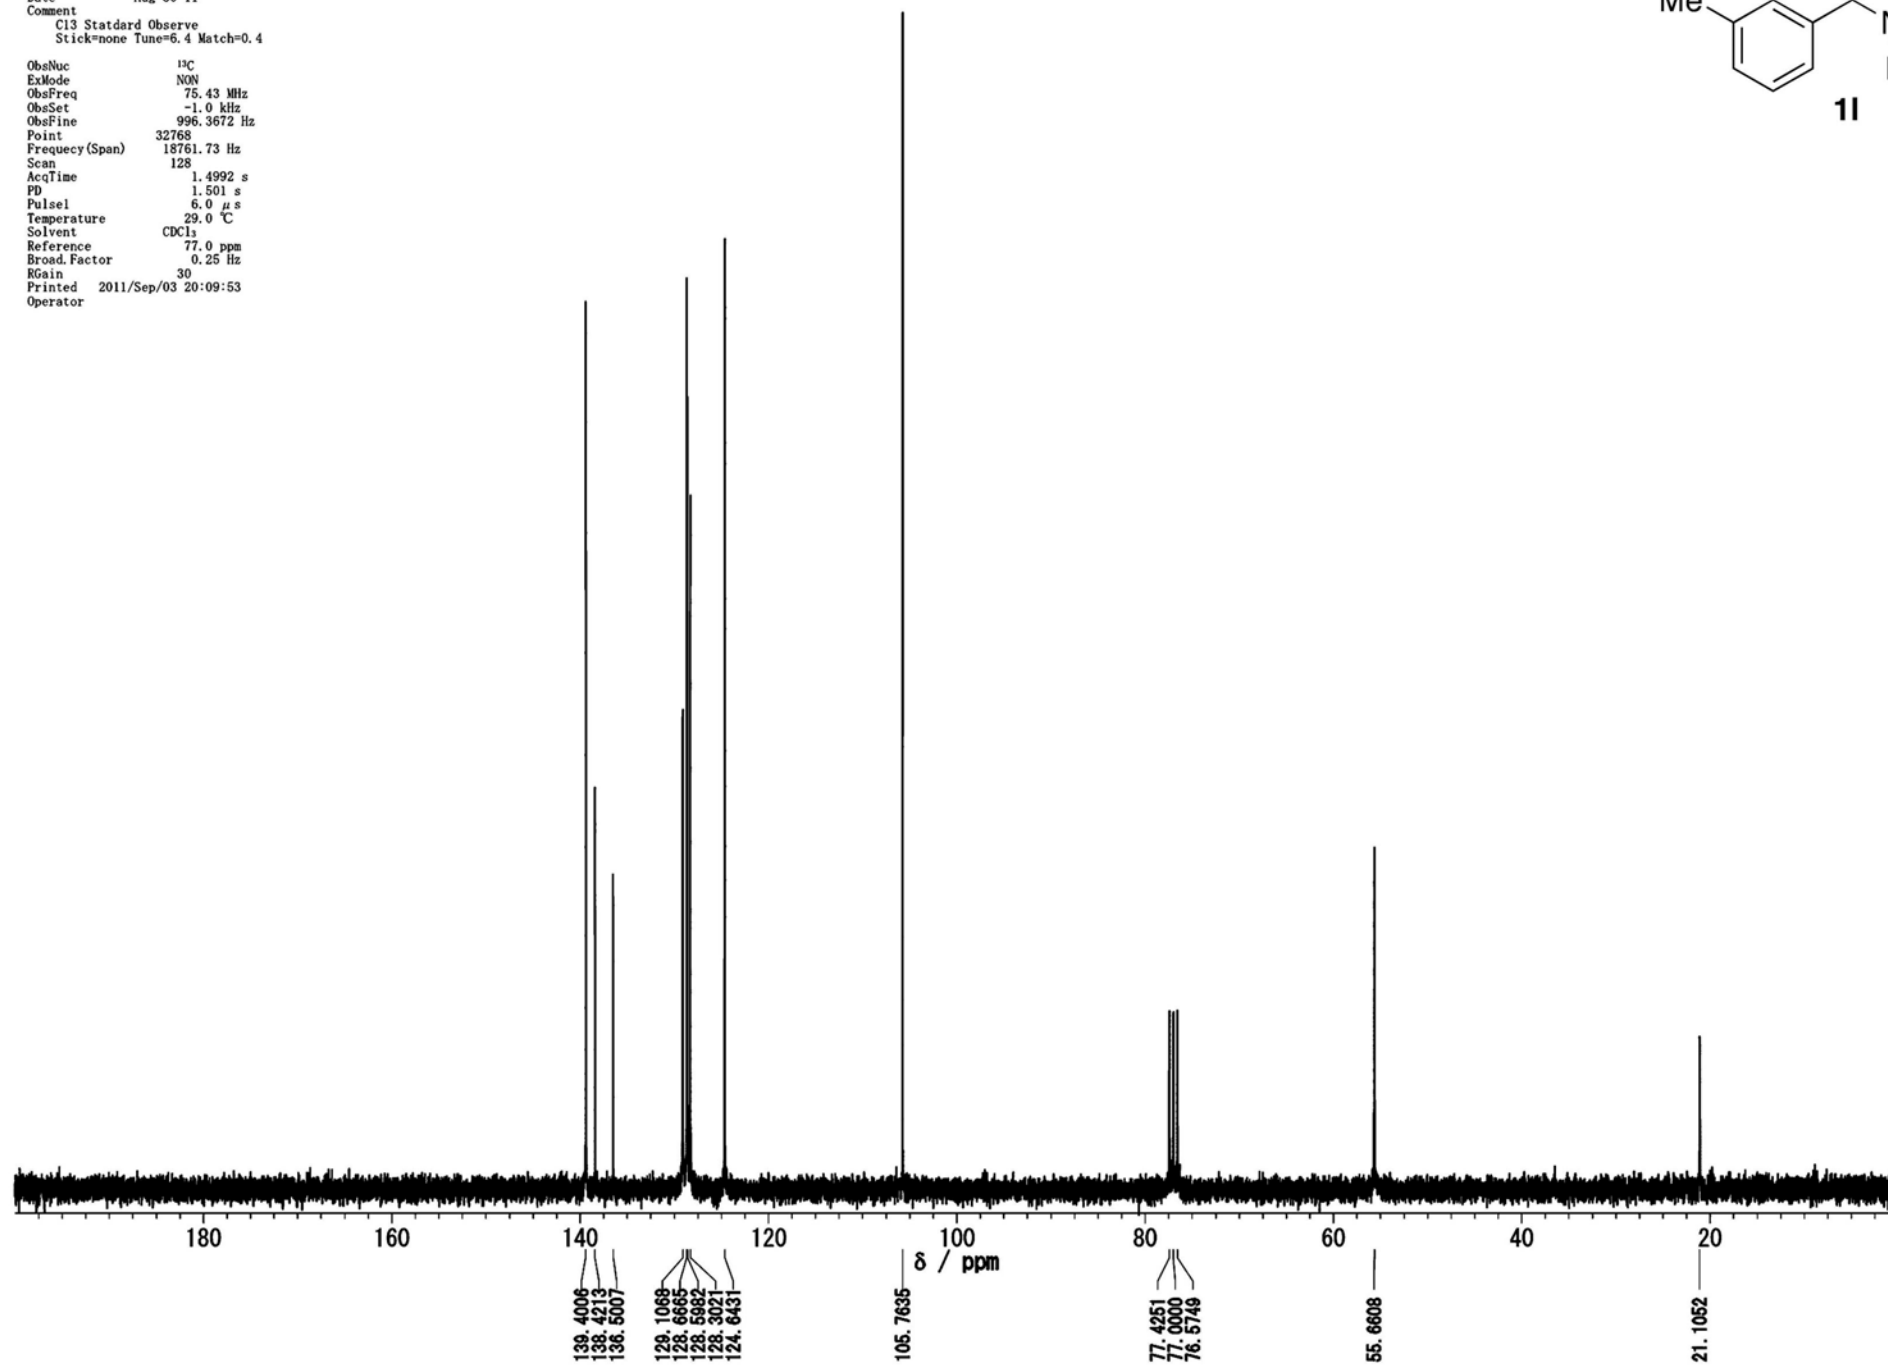

Date Sep 2 11  
 Comment STANDARD 1H OBSERVE  
 ObsNuc <sup>1</sup>H  
 ExMode NON  
 ObsFreq 299.96 MHz  
 ObsSet -1.0 kHz  
 ObsFine 995.0047 Hz  
 Point 16384  
 Frequency (Span) 4500.45 Hz  
 Scan 16  
 AcqTime 3.4983 s  
 PD 1.502 s  
 Pulse 6.0  $\mu$ s  
 Temperature 29.0  $^{\circ}$ C  
 Solvent CDCl<sub>3</sub>  
 Reference 0.0 ppm  
 Broad Factor 0.25 Hz  
 RGain 19  
 Printed 2011/Sep/03 20:12:50  
 Operator

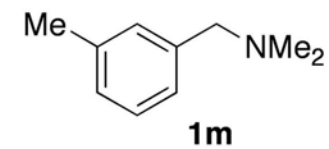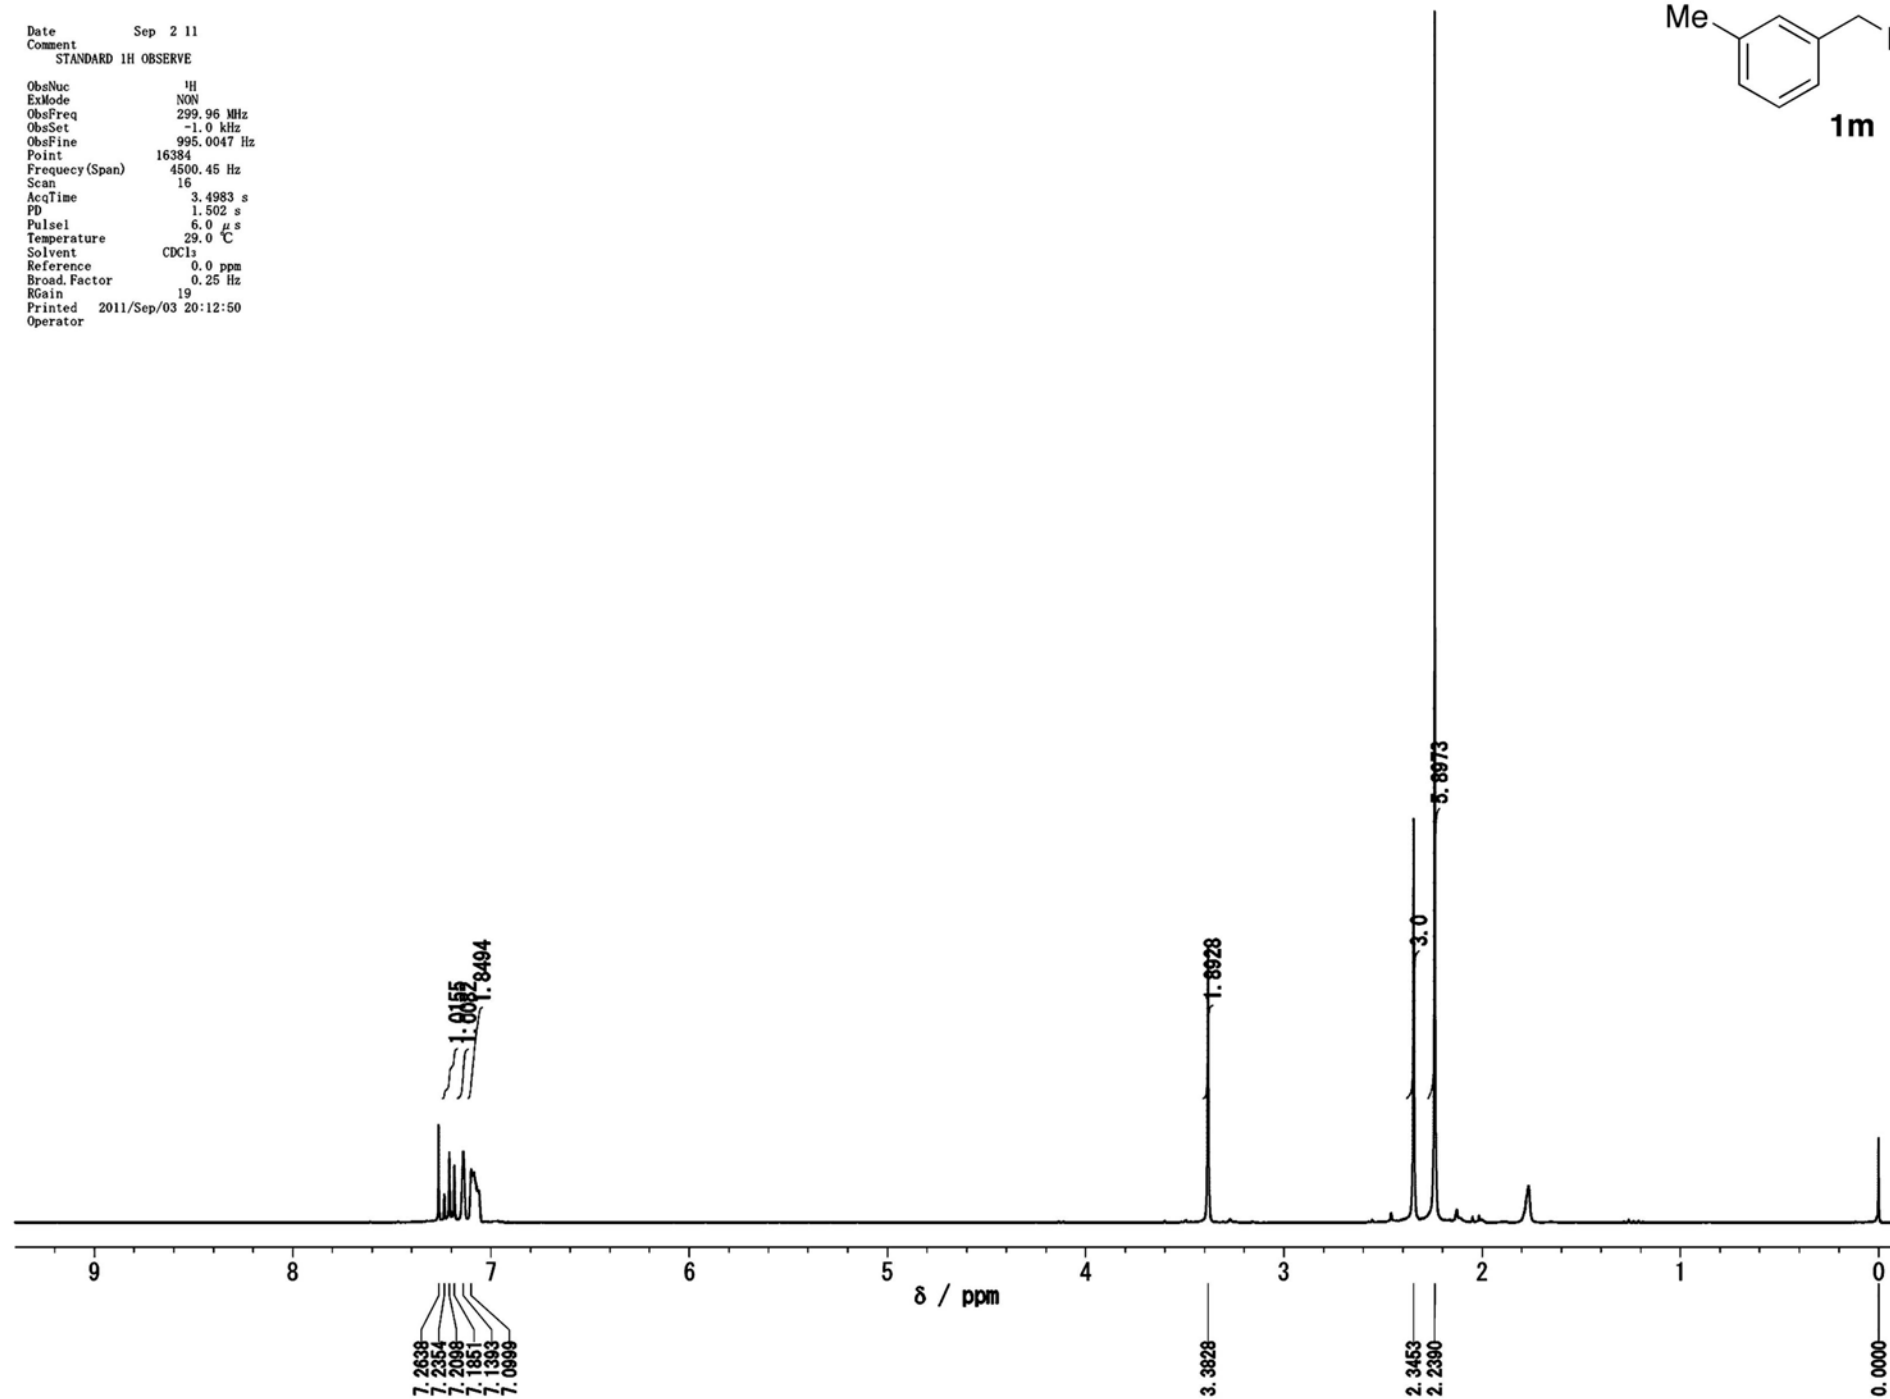

Original File:  
 Date Sep 2 11  
 Comment  
 C13 Statdard Observe  
 Stick=none Tune=6.4 Match=0.4

ObsNuc  $^{13}\text{C}$   
 ExMode NON  
 ObsFreq 75.43 MHz  
 ObsSet -1.0 kHz  
 ObsFine 996.3672 Hz  
 Point 32768  
 Frequency (Span) 18761.73 Hz  
 Scan 192  
 AcqTime 1.4992 s  
 PD 1.501 s  
 Pulsel 6.0  $\mu\text{s}$   
 Temperature 29.0  $^{\circ}\text{C}$   
 Solvent  $\text{CDCl}_3$   
 Reference 77.0 ppm  
 Broad.Factor 0.2863 Hz  
 RGain 30  
 Printed 2011/Sep/03 20:13:37  
 Operator

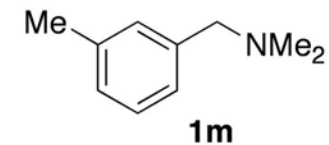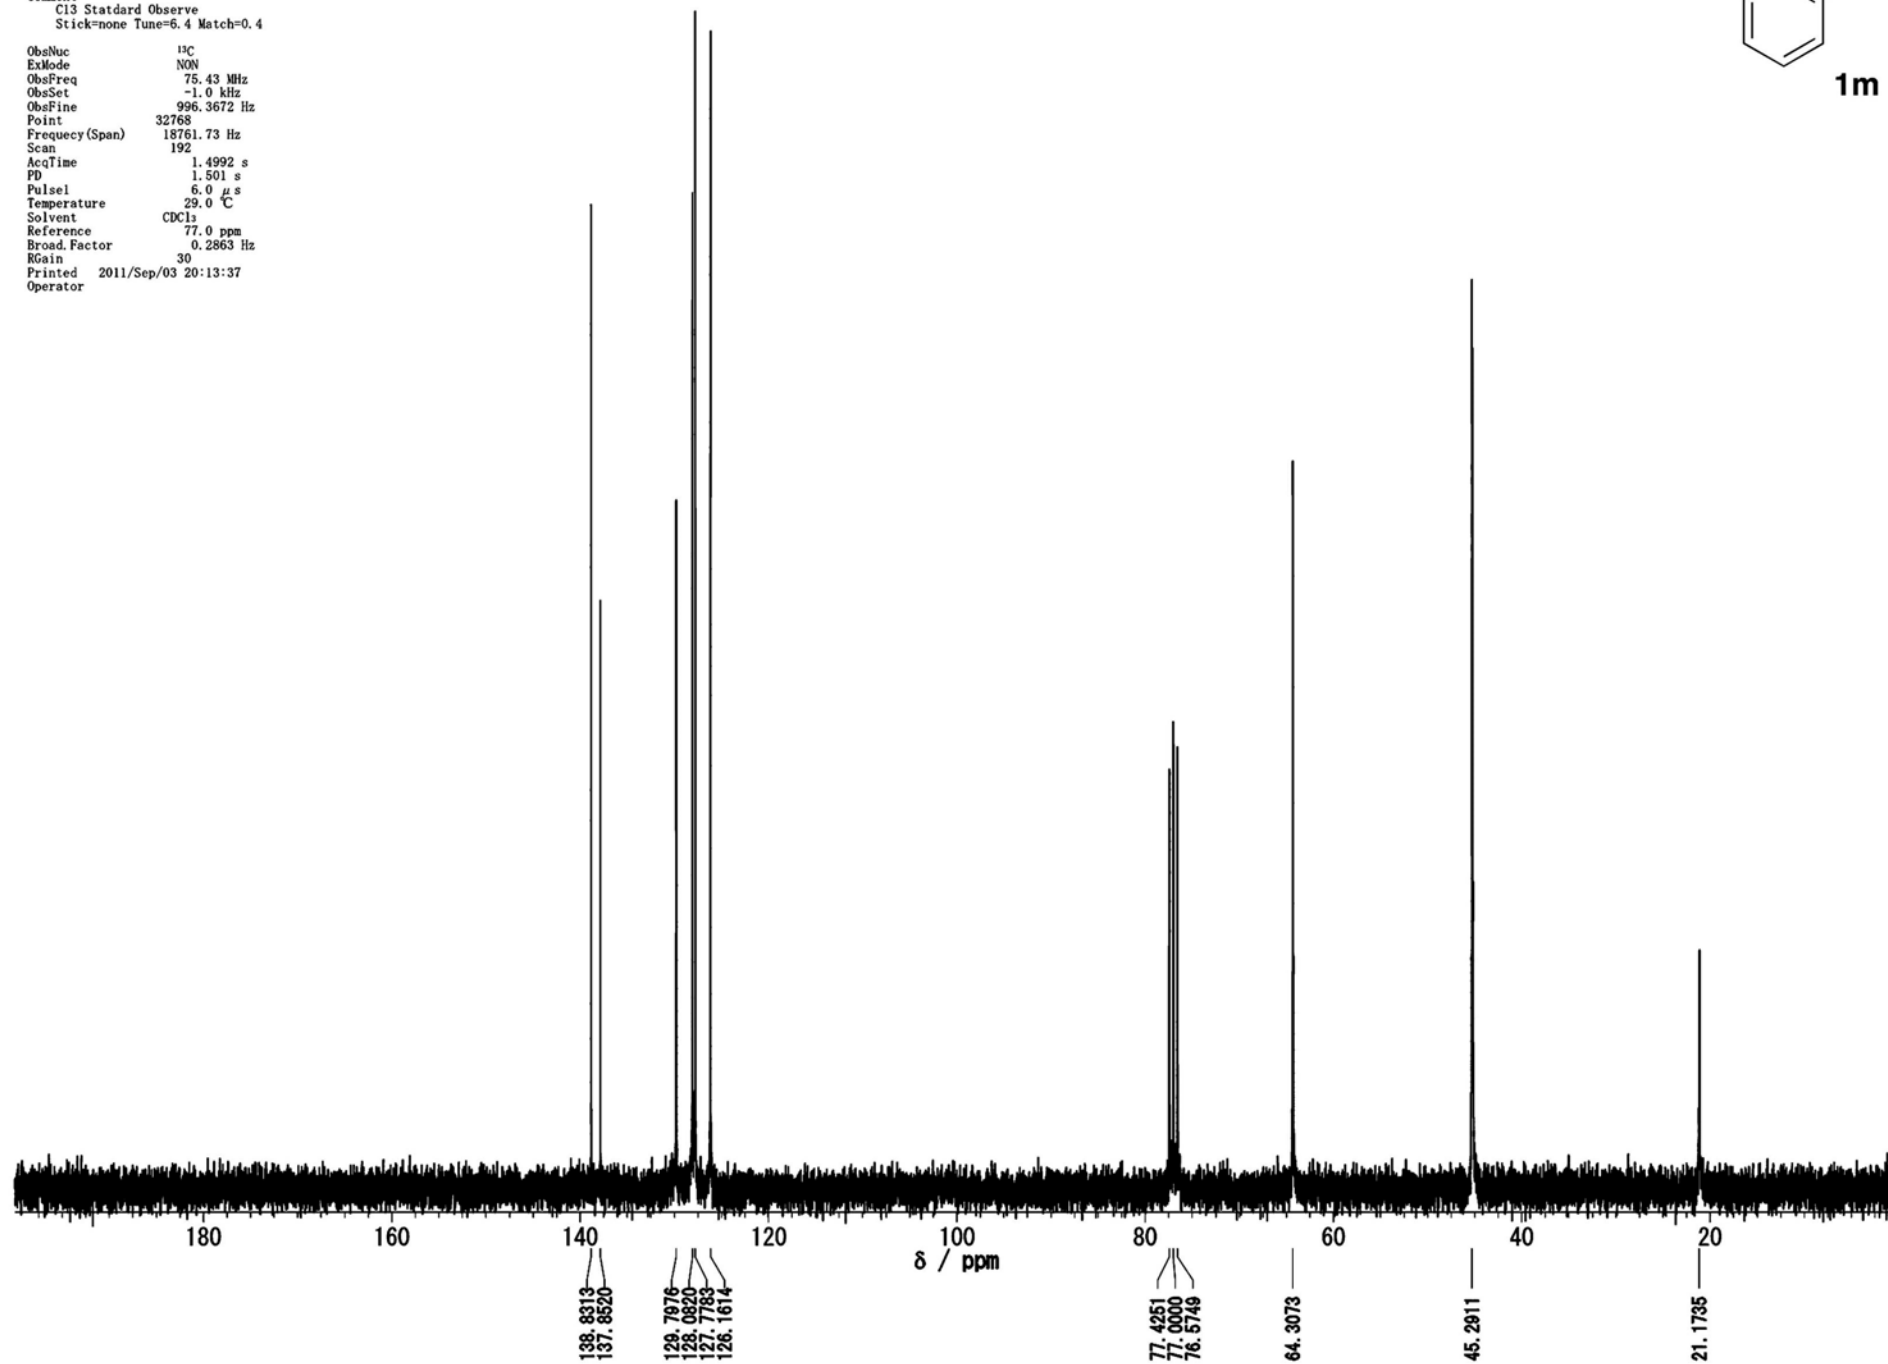

Original File:  
 Date Aug 31 11  
 Comment  
 STANDARD 1H OBSERVE

|                  |                      |
|------------------|----------------------|
| ObsNuc           | <sup>1</sup> H       |
| ExMode           | NON                  |
| ObsFreq          | 299.96 MHz           |
| ObsSet           | -1.0 kHz             |
| ObsPine          | 995.0047 Hz          |
| Point            | 16384                |
| Frequency (Span) | 4500.45 Hz           |
| Scan             | 16                   |
| AcqTime          | 3.4983 s             |
| PD               | 1.502 s              |
| Pulse1           | 6.0 $\mu$ s          |
| Temperature      | 29.0 $^{\circ}$ C    |
| Solvent          | CDCl <sub>3</sub>    |
| Reference        | 0.0 ppm              |
| Broad.Factor     | 0.1373 Hz            |
| RGain            | 1                    |
| Printed          | 2011/Sep/03 20:14:27 |
| Operator         |                      |

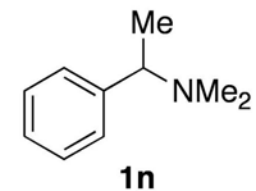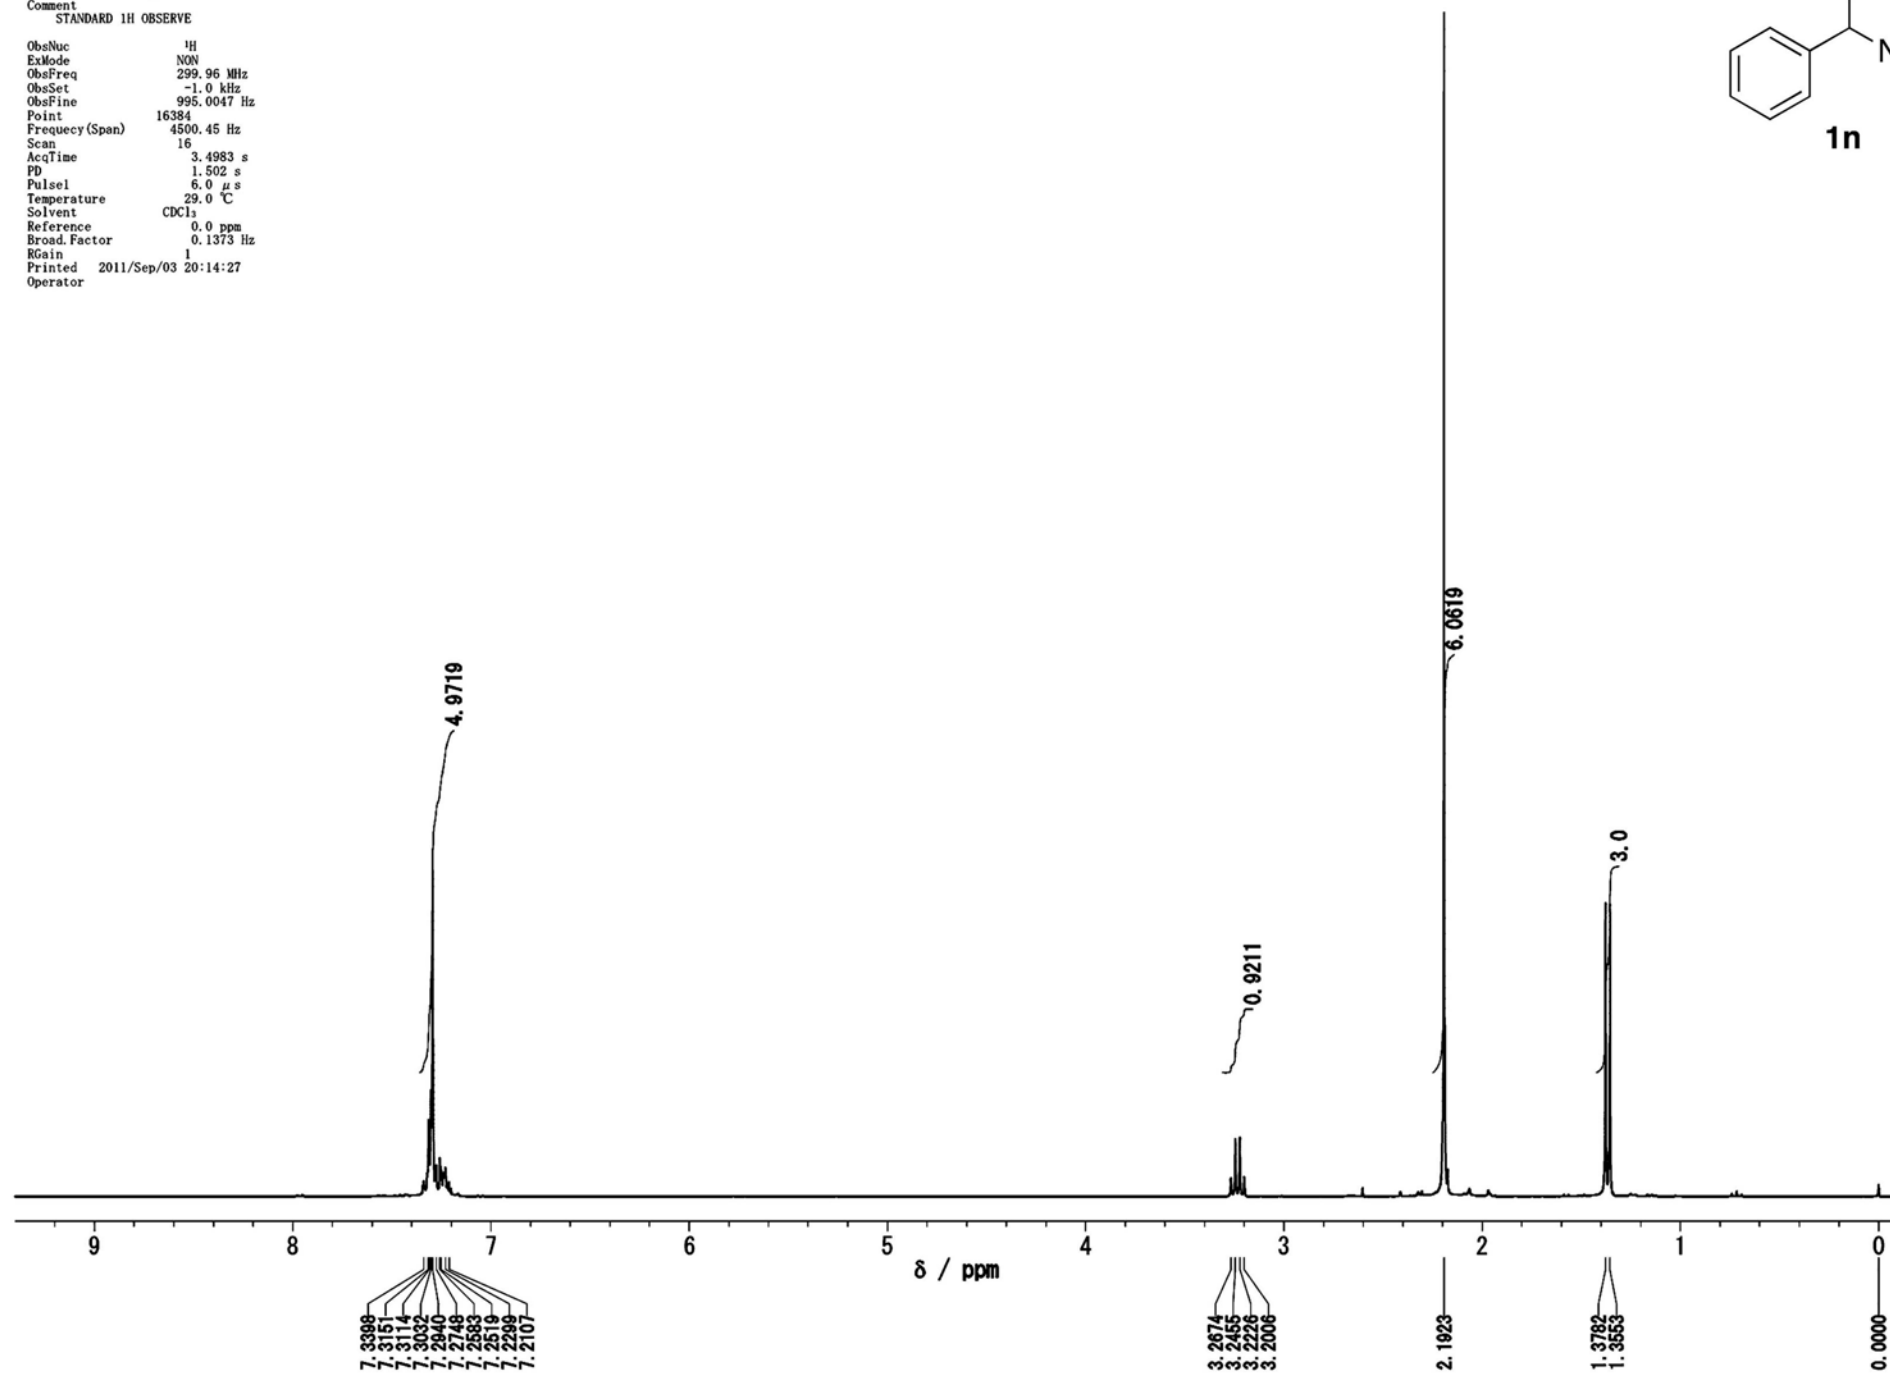

Original File:  
Date Aug 31 11  
Comment  
C13 Statdard Observe  
Stick=none Tune=6.4 Match=0.4

ObsNuc <sup>13</sup>C  
ExMode NON  
ObsFreq 75.43 MHz  
ObsSet -1.0 kHz  
ObsFine 996.3672 Hz  
Point 32768  
Frequency (Span) 18761.73 Hz  
Scan 96  
AcqTime 1.4992 s  
PD 1.501 s  
Pulse 6.0  $\mu$ s  
Temperature 29.0  $^{\circ}$ C  
Solvent CDCl<sub>3</sub>  
Reference 77.0 ppm  
Broad Factor 0.2863 Hz  
RGain 30  
Printed 2011/Sep/03 20:15:10  
Operator

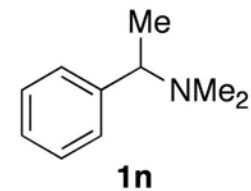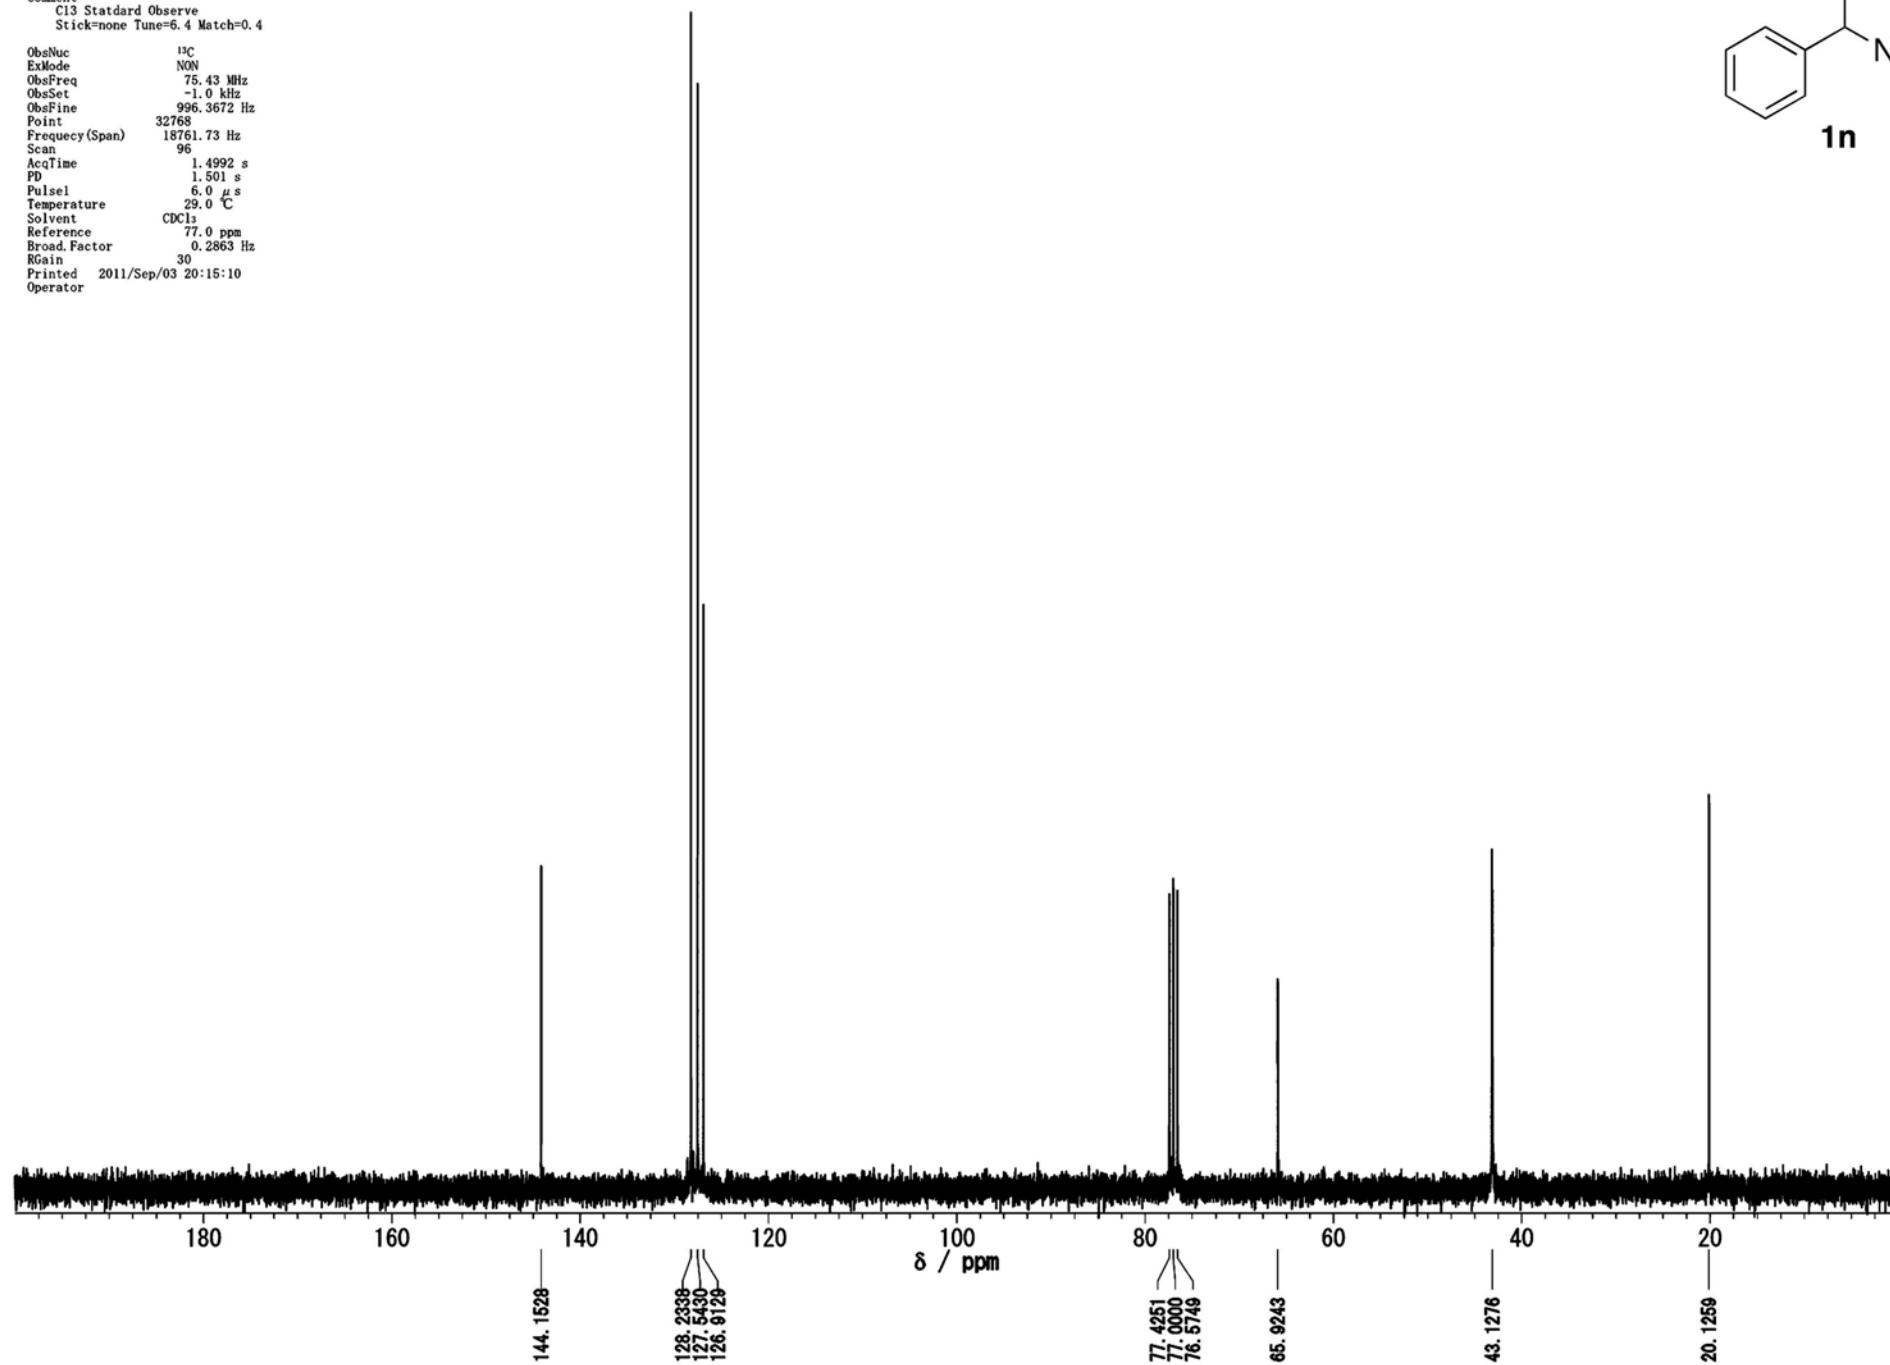



Original File:  
 Date Aug 31 11  
 Comment  
 STANDARD 1H OBSERVE

|                  |                      |
|------------------|----------------------|
| ObsNuc           | <sup>1</sup> H       |
| ExMode           | NON                  |
| ObsFreq          | 299.96 MHz           |
| ObsSet           | -1.0 kHz             |
| ObsPine          | 995.0047 Hz          |
| Point            | 16384                |
| Frequency (Span) | 4500.45 Hz           |
| Scan             | 16                   |
| AcqTime          | 3.4983 s             |
| PD               | 1.502 s              |
| Pulse1           | 6.0 $\mu$ s          |
| Temperature      | 29.0 $^{\circ}$ C    |
| Solvent          | CDCl <sub>3</sub>    |
| Reference        | 0.0 ppm              |
| Broad.Factor     | 0.1373 Hz            |
| RGain            | 14                   |
| Printed          | 2011/Sep/03 20:16:01 |
| Operator         |                      |

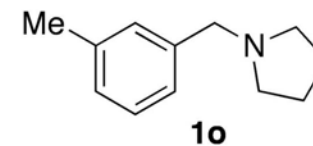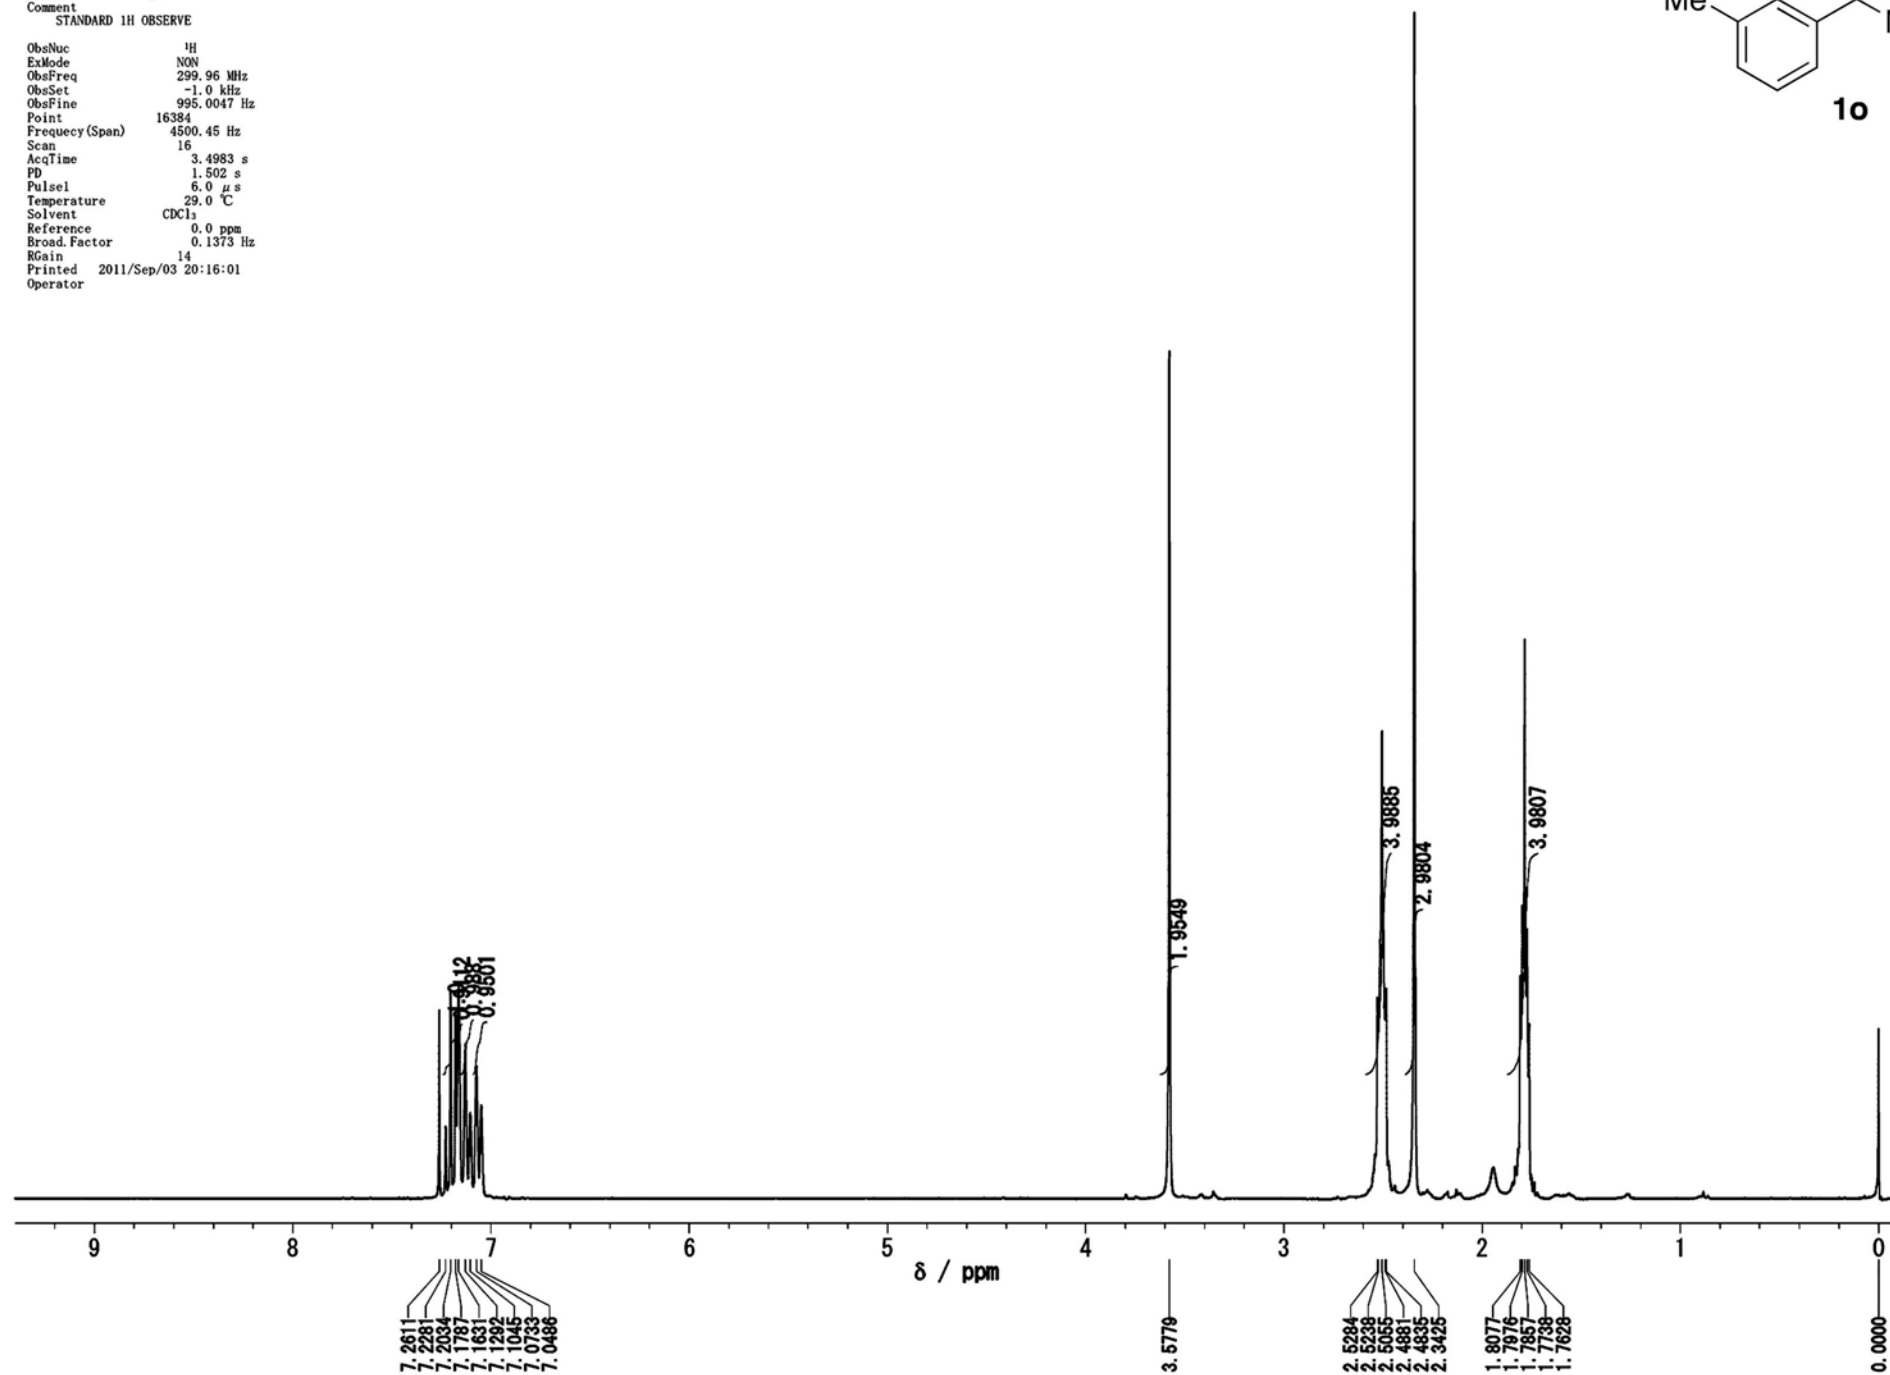

Original File:  
 Date Aug 31 11  
 Comment  
 C13 Statdard Observe  
 Stick=none Tune=6.4 Match=0.4

ObsNuc <sup>13</sup>C  
 ExMode NON  
 ObsFreq 75.43 MHz  
 ObsSet -1.0 kHz  
 ObsFine 996.3672 Hz  
 Point 32768  
 Frequency (Span) 18761.73 Hz  
 Scan 4000  
 AcqTime 1.4992 s  
 PD 1.501 s  
 Pulsel 6.0  $\mu$ s  
 Temperature 29.0  $^{\circ}$ C  
 Solvent CDCl<sub>3</sub>  
 Reference 77.0 ppm  
 Broad.Factor 0.2863 Hz  
 RGain 30  
 Printed 2011/Sep/03 20:16:56  
 Operator

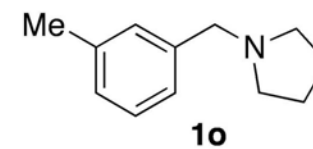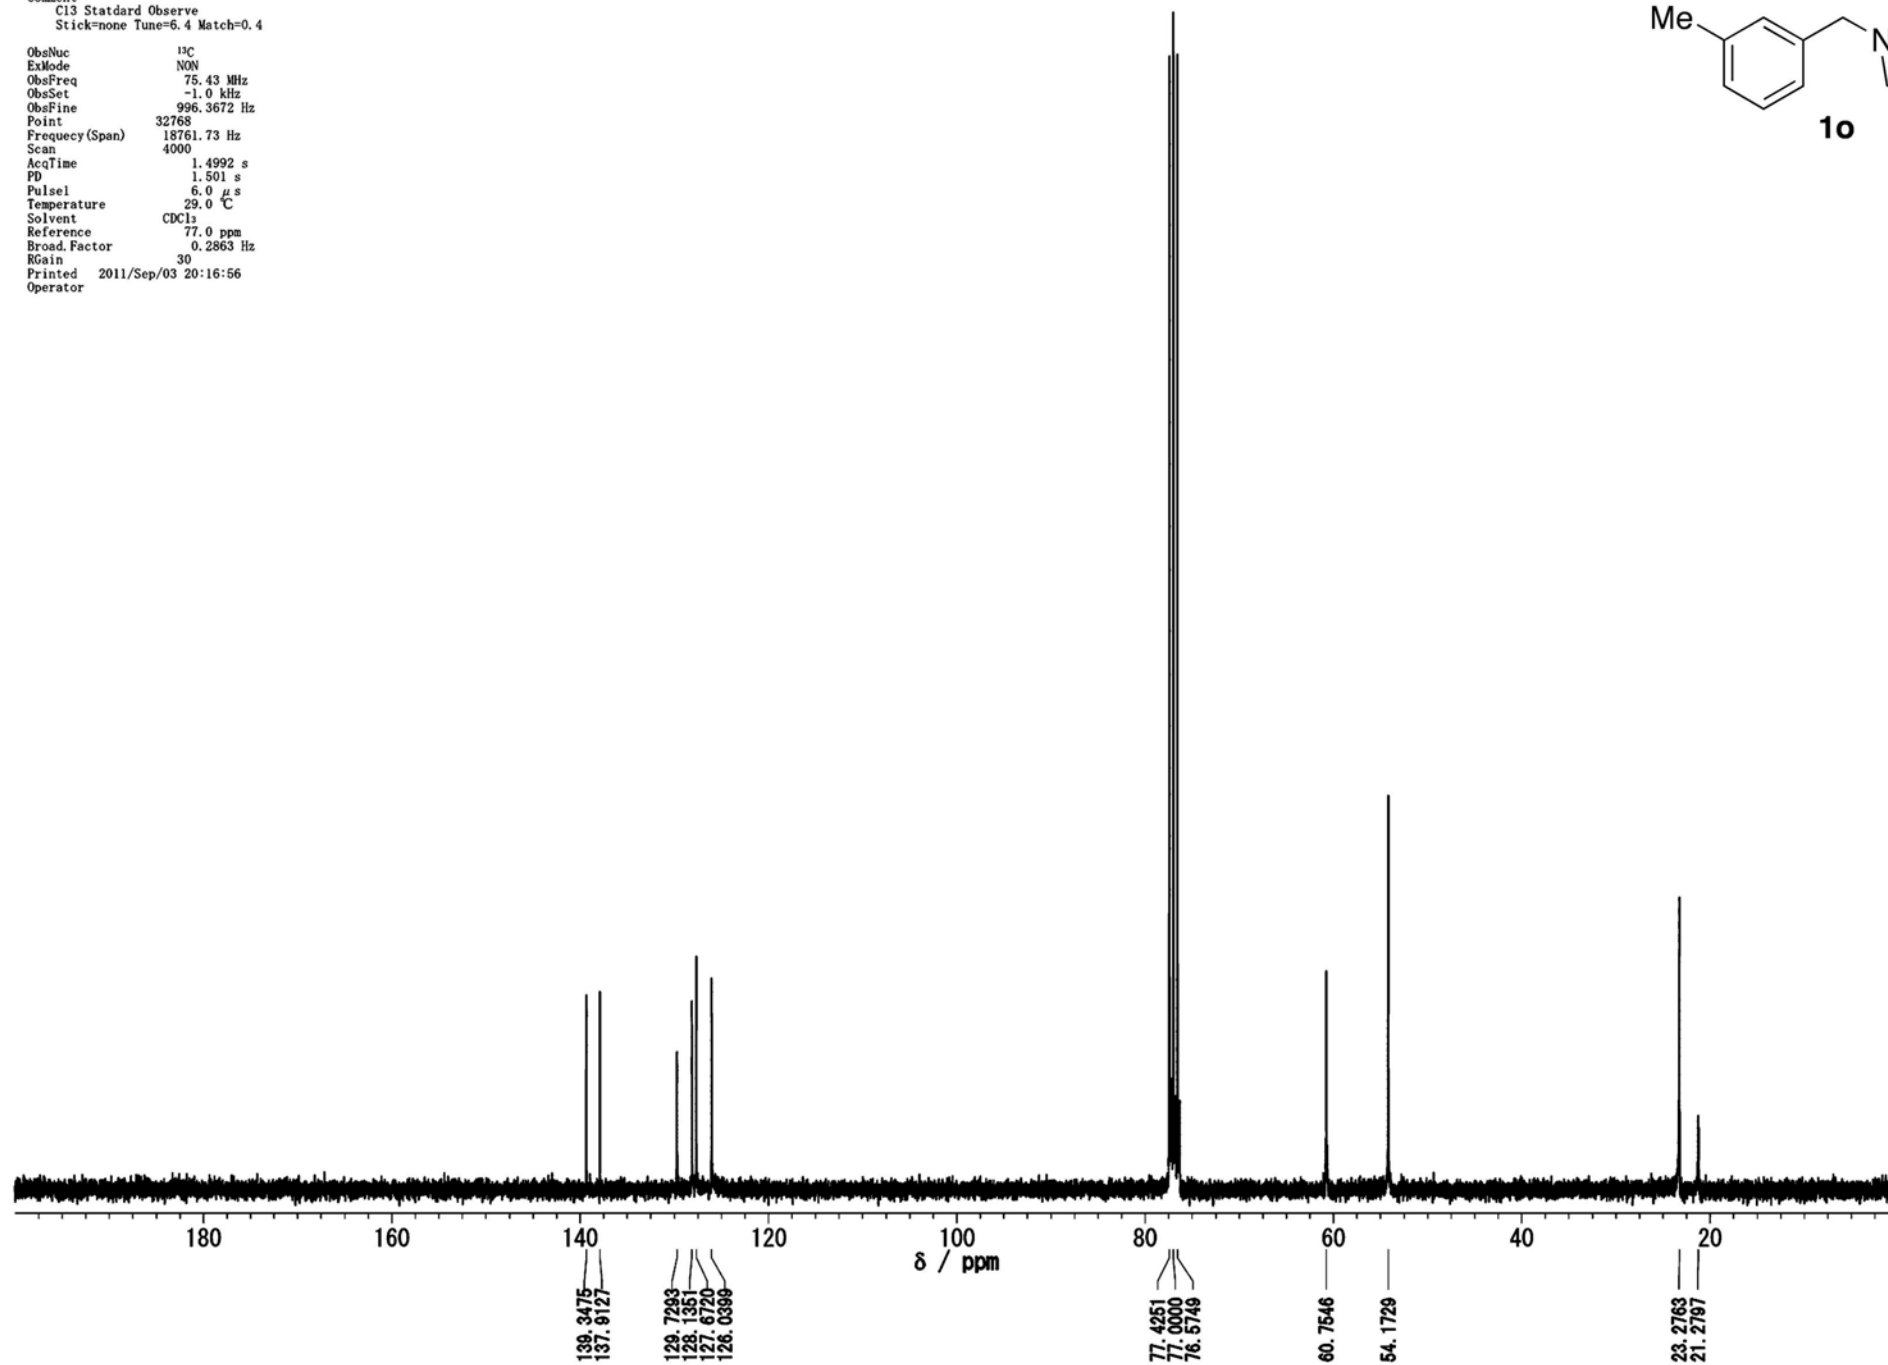

Original File:   
 Date Jul 19 11   
 Comment STANDARD 1H OBSERVE   
 ObsNuc 1H   
 ExMode NON   
 ObsFreq 299.96 MHz   
 ObsSet -1.0 kHz   
 ObsPine 995.0047 Hz   
 Point 16384   
 Frequency (Span) 4500.45 Hz   
 Scan 32   
 AcqTime 3.4983 s   
 PD 1.502 s   
 Pulse 6.0  $\mu$ s   
 Temperature 29.0  $^{\circ}$ C   
 Solvent CDCl<sub>3</sub>   
 Reference 0.0 ppm   
 Broad.Factor 0.1373 Hz   
 RGain 18   
 Printed 2011/Sep/03 20:18:04   
 Operator

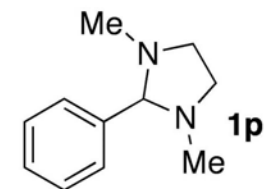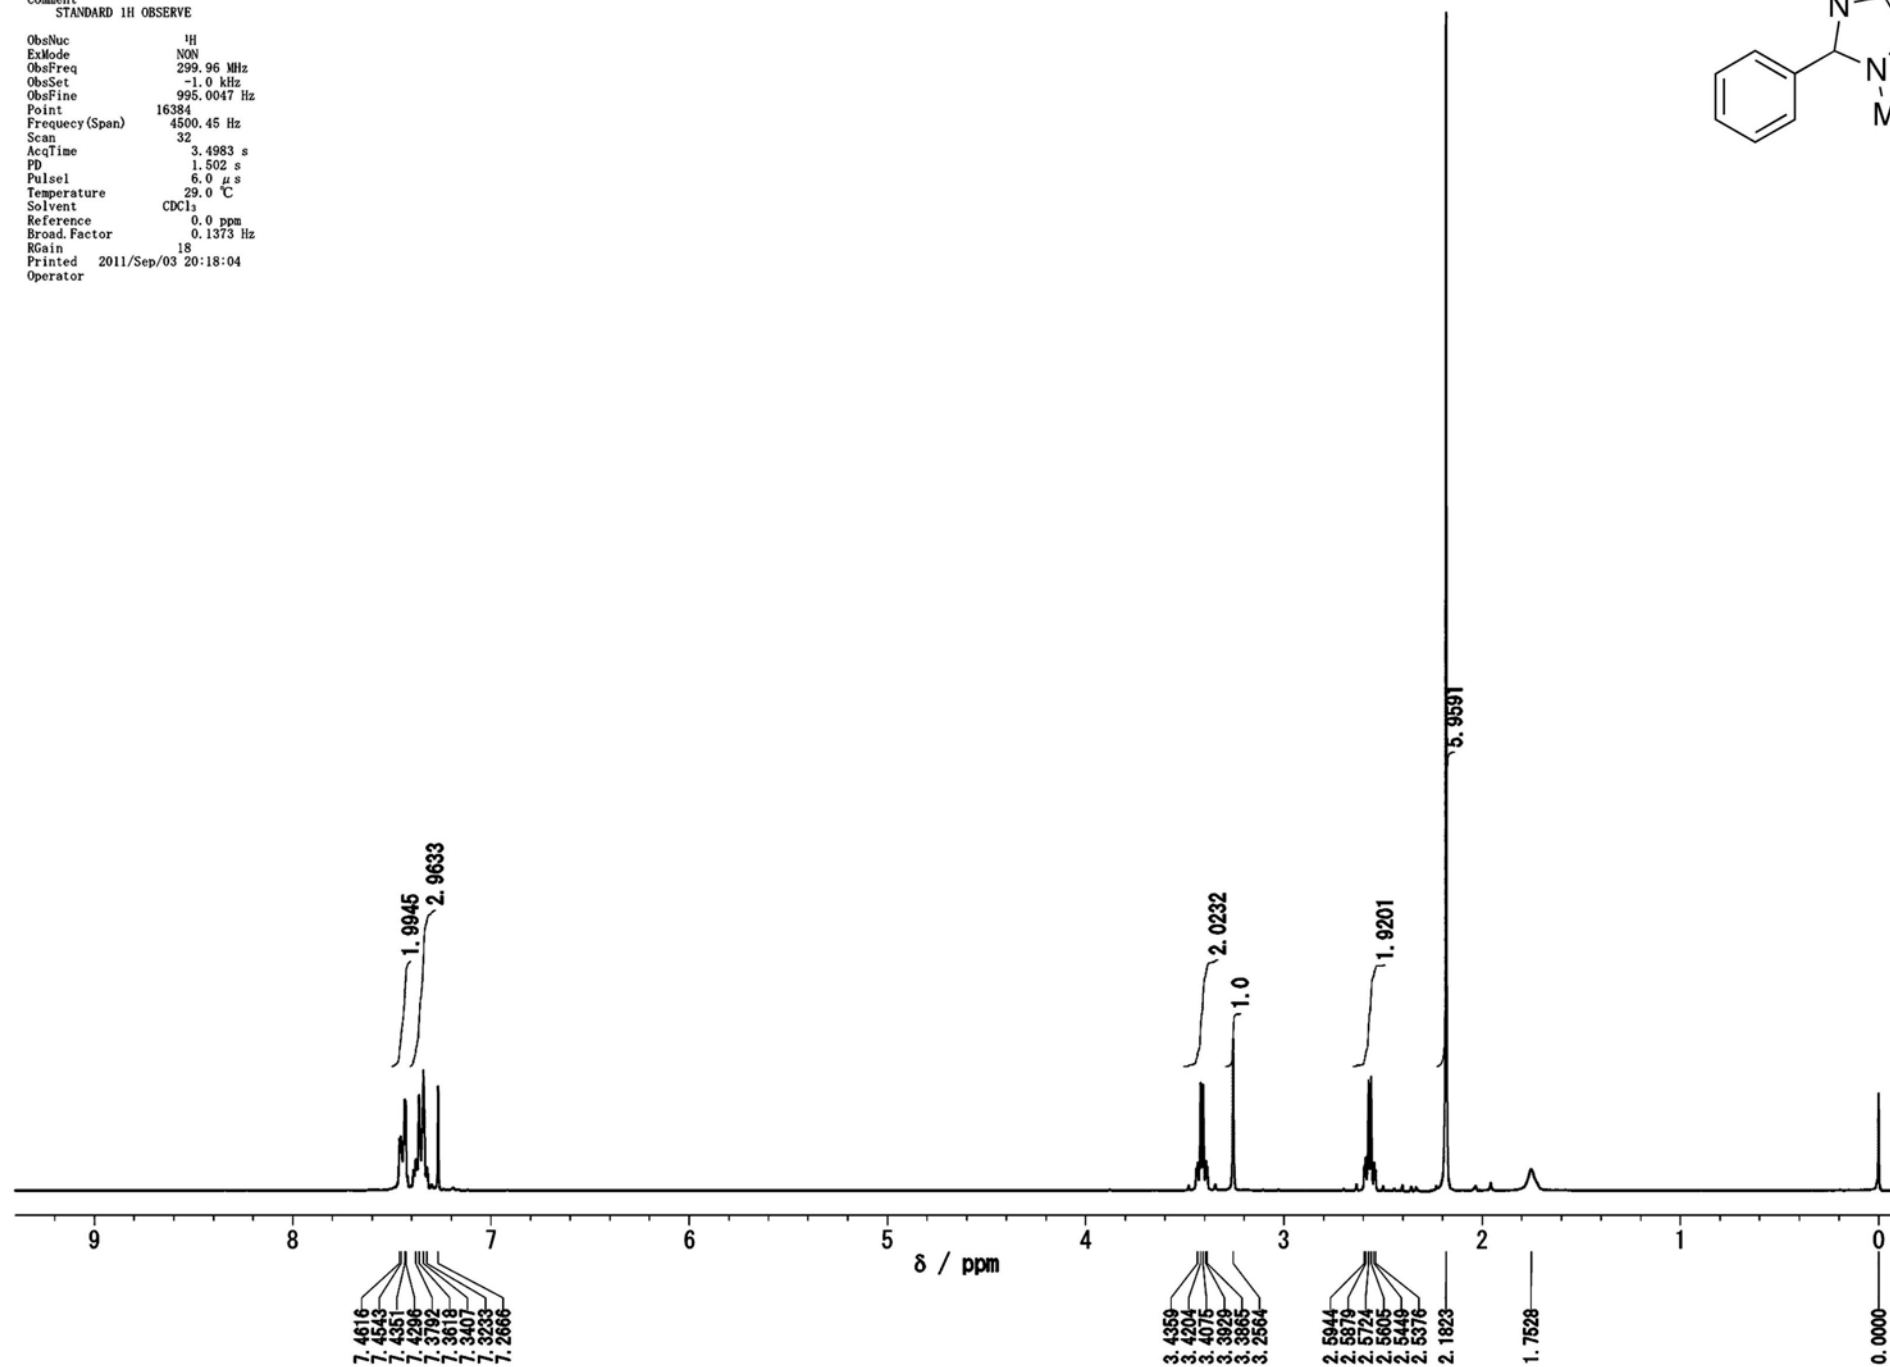

Date Jul 21 11  
 Comment C13 Statdard Observe  
 Stick=none Tune=6.4 Match=0.4  
 ObsNuc <sup>13</sup>C  
 ExMode NGV  
 ObsFreq 75.43 MHz  
 ObsSet -1.0 kHz  
 ObsFine 996.3672 Hz  
 Point 32768  
 Frequency (Span) 18761.73 Hz  
 Scan 5000  
 AcqTime 1.4992 s  
 PD 1.501 s  
 Pulse 6.0  $\mu$ s  
 Temperature 29.0  $^{\circ}$ C  
 Solvent CDCl<sub>3</sub>  
 Reference 77.0 ppm  
 Broad. Factor 0.25 Hz  
 RGain 30  
 Printed 2011/Sep/03 20:19:41  
 Operator

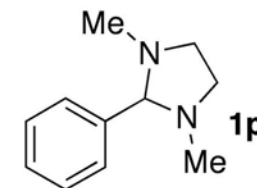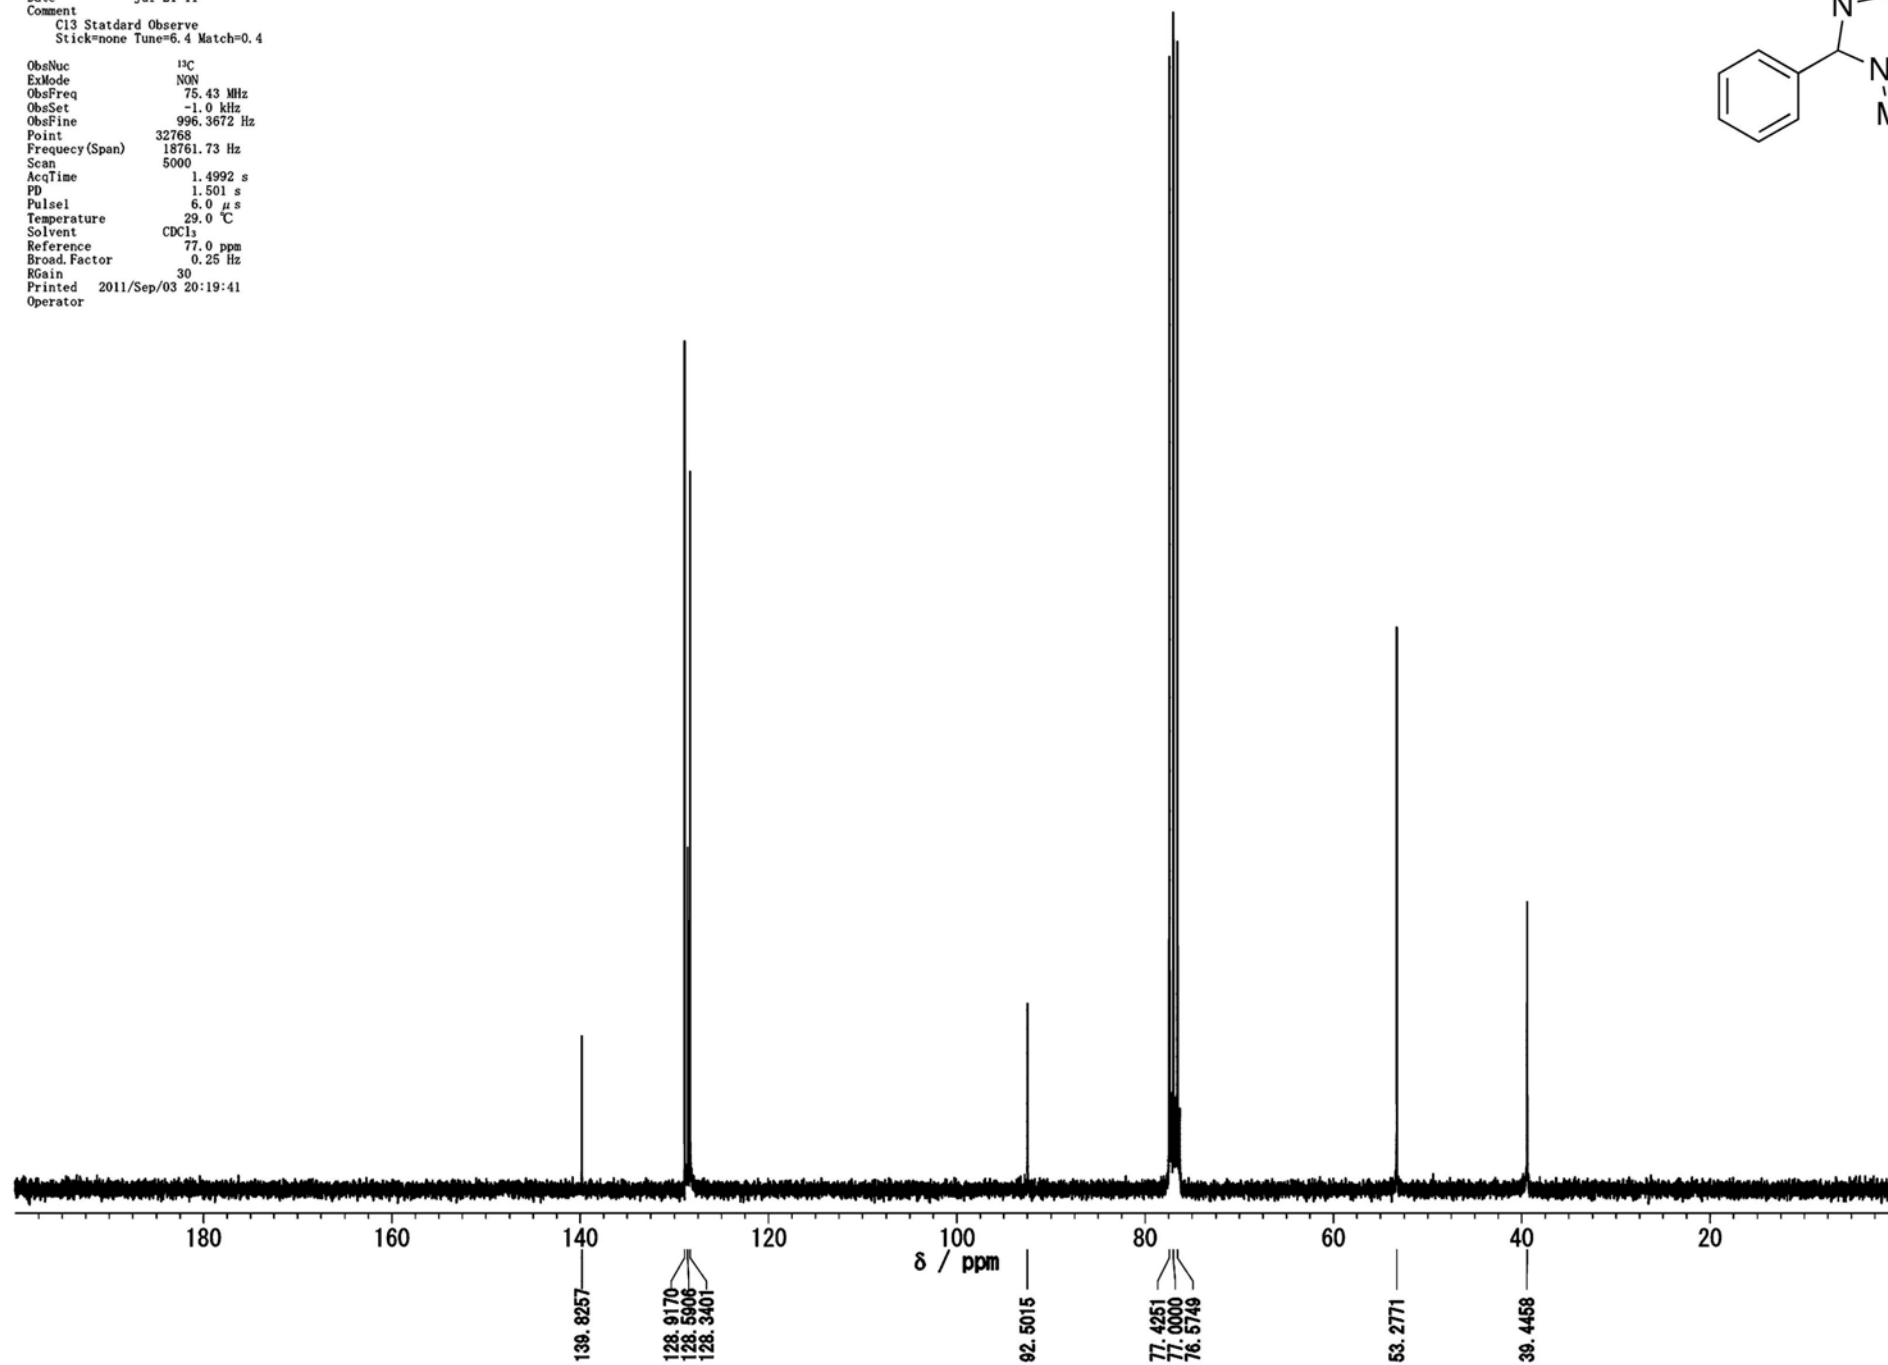

Original File: Jul 16 11  
 Date: Jul 16 11  
 Comment: STANDARD 1H OBSERVE  
 ObsNuc: <sup>1</sup>H  
 ExMode: NON  
 ObsFreq: 299.96 MHz  
 ObsSet: -1.0 kHz  
 ObsPine: 995.0047 Hz  
 Point: 16384  
 Frequency (Span): 4500.45 Hz  
 Scan: 16  
 AcqTime: 3.4983 s  
 PD: 1.502 s  
 Pulse1: 6.0 μs  
 Temperature: 29.0 °C  
 Solvent: CDCl<sub>3</sub>  
 Reference: 0.0 ppm  
 Broad Factor: 0.1373 Hz  
 RGain: 24  
 Printed: 2011/Jul/28 15:24:53  
 Operator:

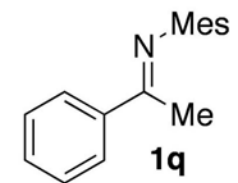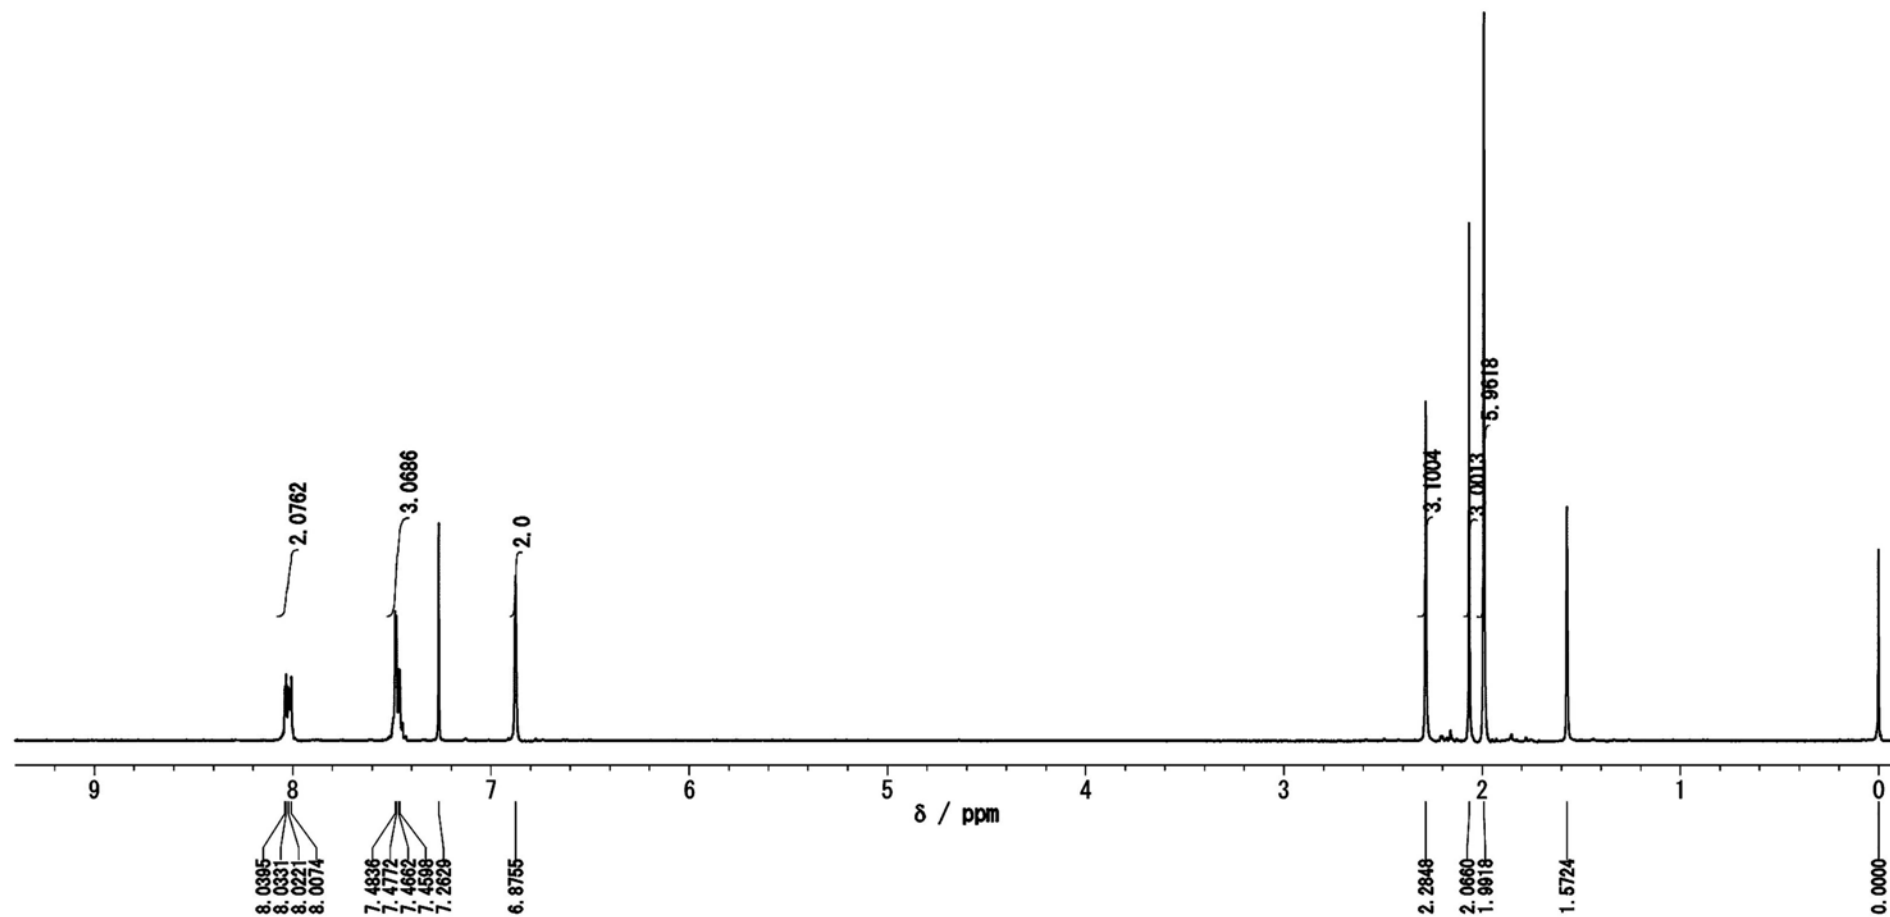

```

ObsNuc      13C
ExHmode      NON
ObsFreq      75.43 MHz
ObsSet      -1.0 kHz
ObsFine      996.3672 Hz
Point      32768
Frequency(Span) 18761.73 Hz
Scan      300
AcqTime      1.4992 s
PD      1.501 s
Puls1      6.0  $\mu$ s
Temperature  29.0  $^{\circ}$ C
Solvent      CDCl3
Reference    77.0 ppm
Broad_Factor 0.2863 Hz
RGain      30
Printed      2011/jul/28 15:37:56
Operator

```

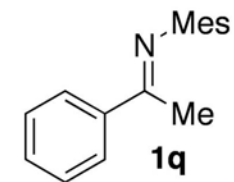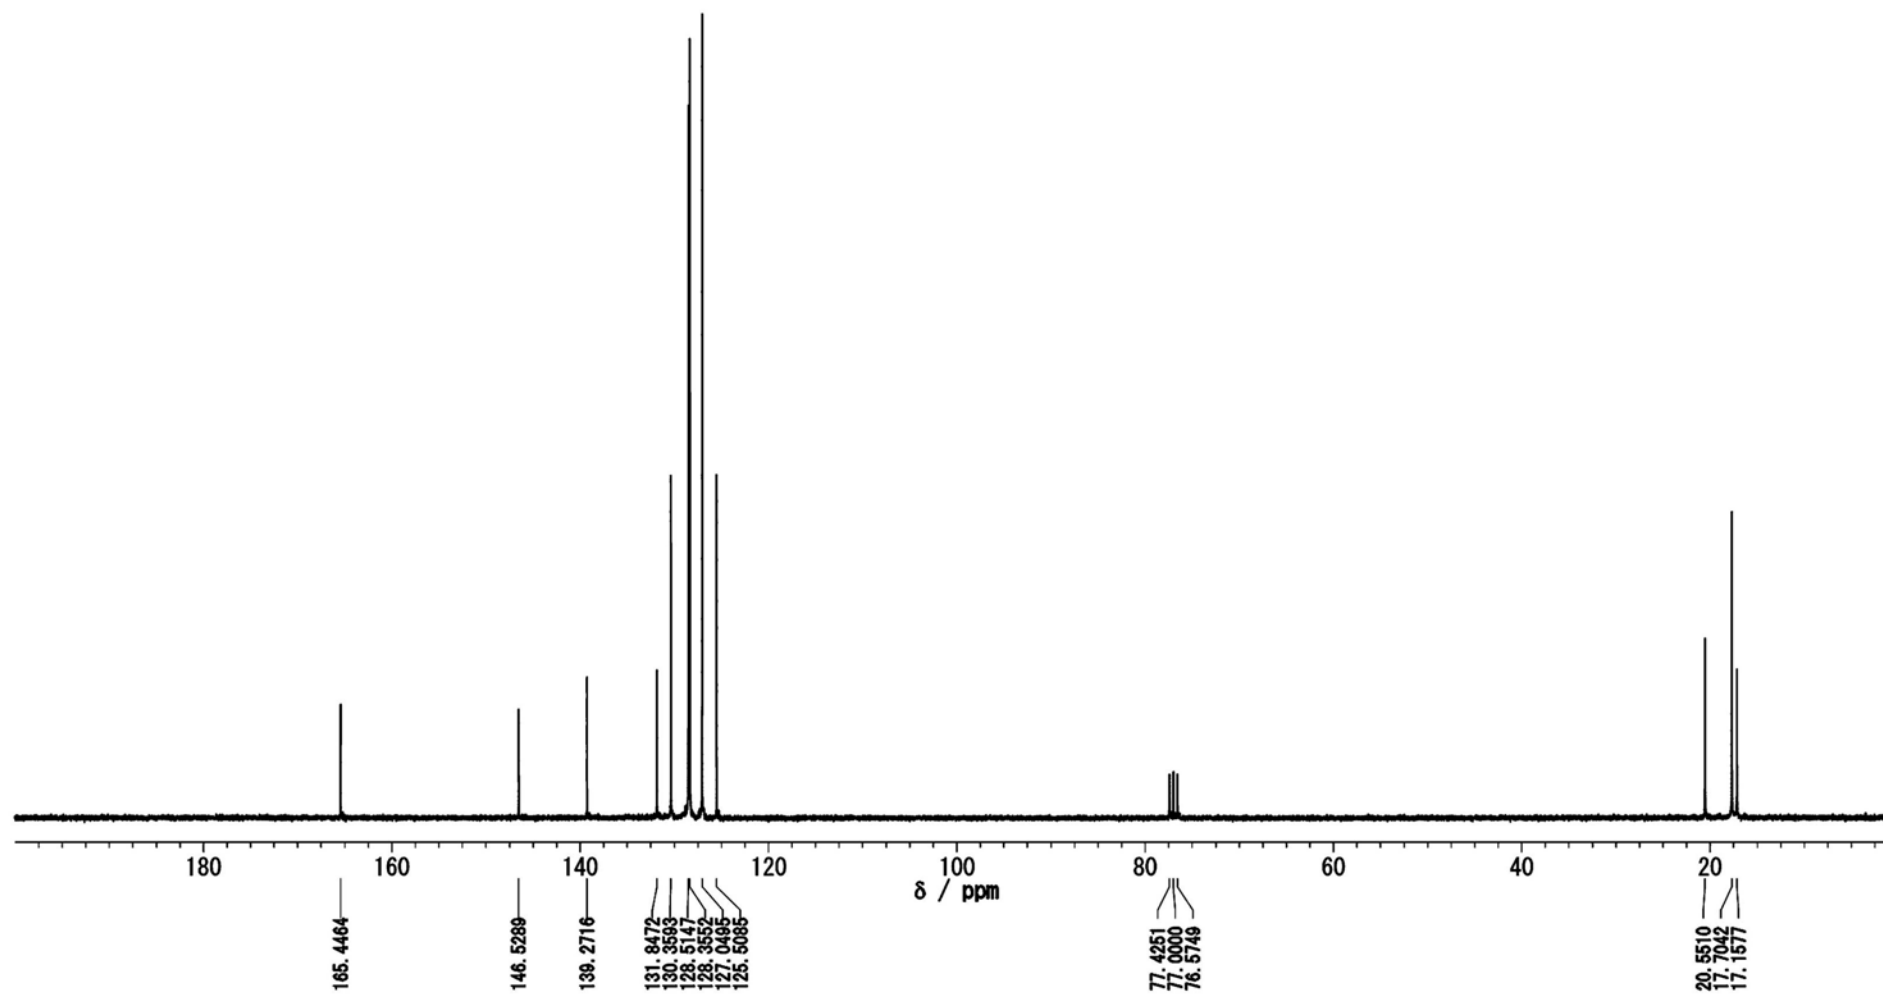

Original File:  
Date 11/May/2016 00:00:00  
Comment  
STANDARD 1H OBSERVE

ObsNuc <sup>1</sup>H  
ExMode NON  
ObsFreq 299.96 MHz  
ObsSet -1.0 kHz  
ObsPine 995.0047 Hz  
Point 16384  
Frequency (Span) 4500.45 Hz  
Scan 16  
AcqTime 3.4983 s  
PD 1.502 s  
Pulse 6.0  $\mu$ s  
Temperature 29.0  $^{\circ}$ C  
Solvent CDCl<sub>3</sub>  
Reference 0.0 ppm  
Broad Factor 0.1373 Hz  
RGain 14  
Printed 2011/Sep/03 20:20:24  
Operator

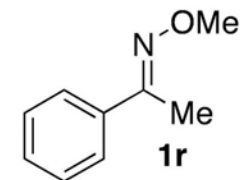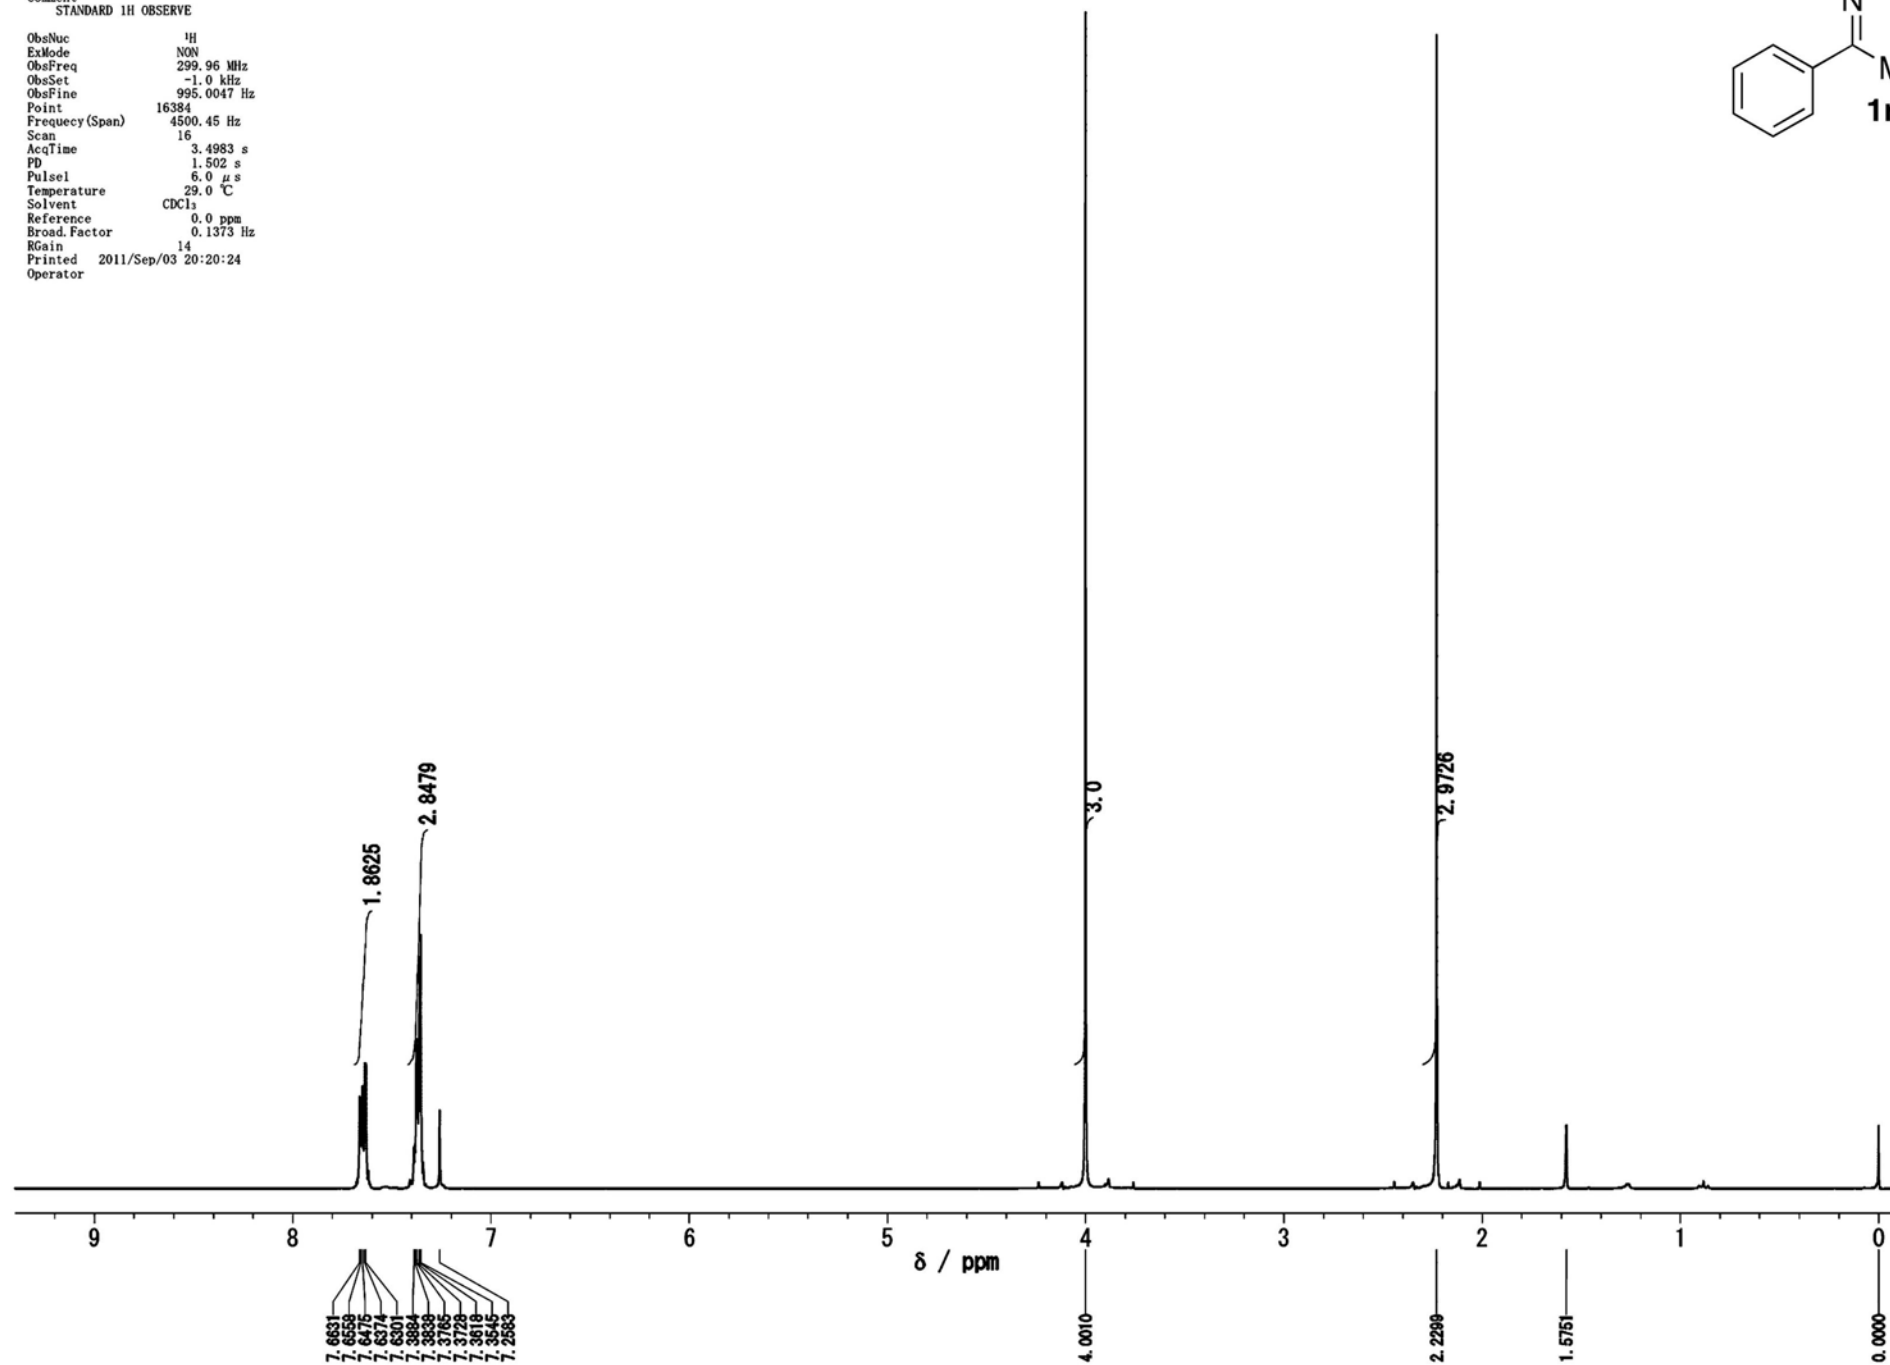

Original File:  
 Date Sep 2 11  
 Comment  
 C13 Statdard Observe  
 Stick=none Tune=6.4 Match=0.4

ObsNuc  $^{13}\text{C}$   
 ExMode NON  
 ObsFreq 75.43 MHz  
 ObsSet -1.0 kHz  
 ObsFine 996.3672 Hz  
 Point 32768  
 Frequency (Span) 18761.73 Hz  
 Scan 48  
 AcqTime 1.4992 s  
 PD 1.501 s  
 Pulse 6.0  $\mu\text{s}$   
 Temperature 29.0  $^{\circ}\text{C}$   
 Solvent  $\text{CDCl}_3$   
 Reference 77.0 ppm  
 Broad Factor 0.2863 Hz  
 RGain 30  
 Printed 2011/Sep/03 20:21:09  
 Operator

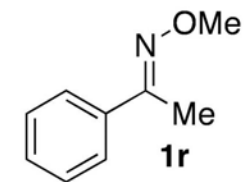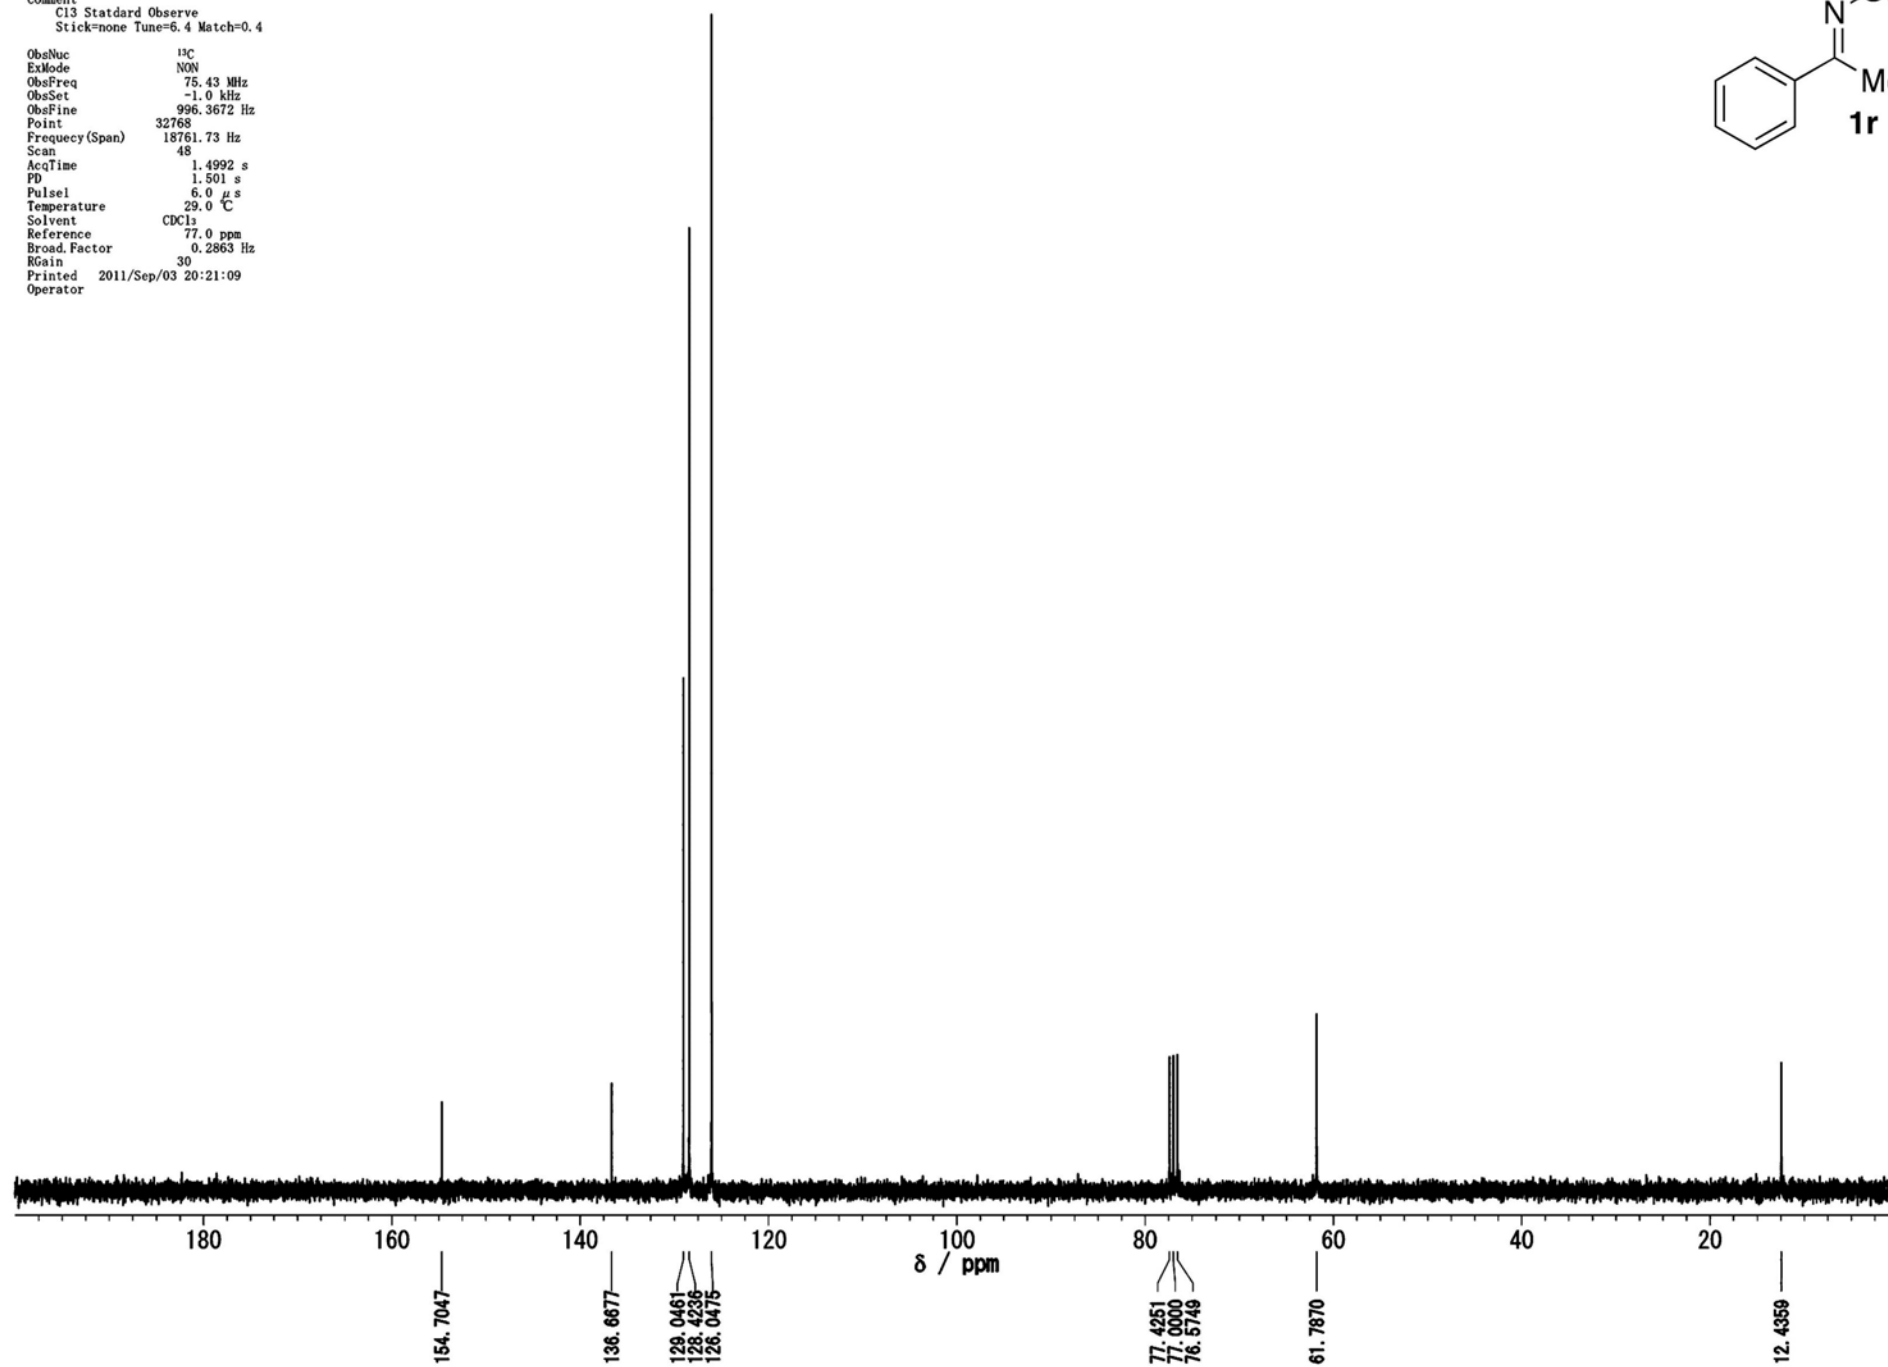



Original File:  
 Date Jun 30 11  
 Comment  
 STANDARD 1H OBSERVE

|                  |                      |
|------------------|----------------------|
| ObsNuc           | <sup>1</sup> H       |
| ExMode           | NON                  |
| ObsFreq          | 299.96 MHz           |
| ObsSet           | -1.0 kHz             |
| ObsPine          | 995.0047 Hz          |
| Point            | 16384                |
| Frequency (Span) | 4500.45 Hz           |
| Scan             | 16                   |
| AcqTime          | 3.4983 s             |
| PD               | 1.502 s              |
| Pulse1           | 6.0 $\mu$ s          |
| Temperature      | 29.0 $^{\circ}$ C    |
| Solvent          | CDCl <sub>3</sub>    |
| Reference        | 0.0 ppm              |
| Broad. Factor    | 0.1373 Hz            |
| RGain            | 30                   |
| Printed          | 2011/Jul/28 15:33:11 |
| Operator         |                      |

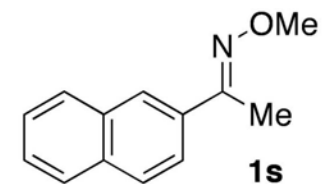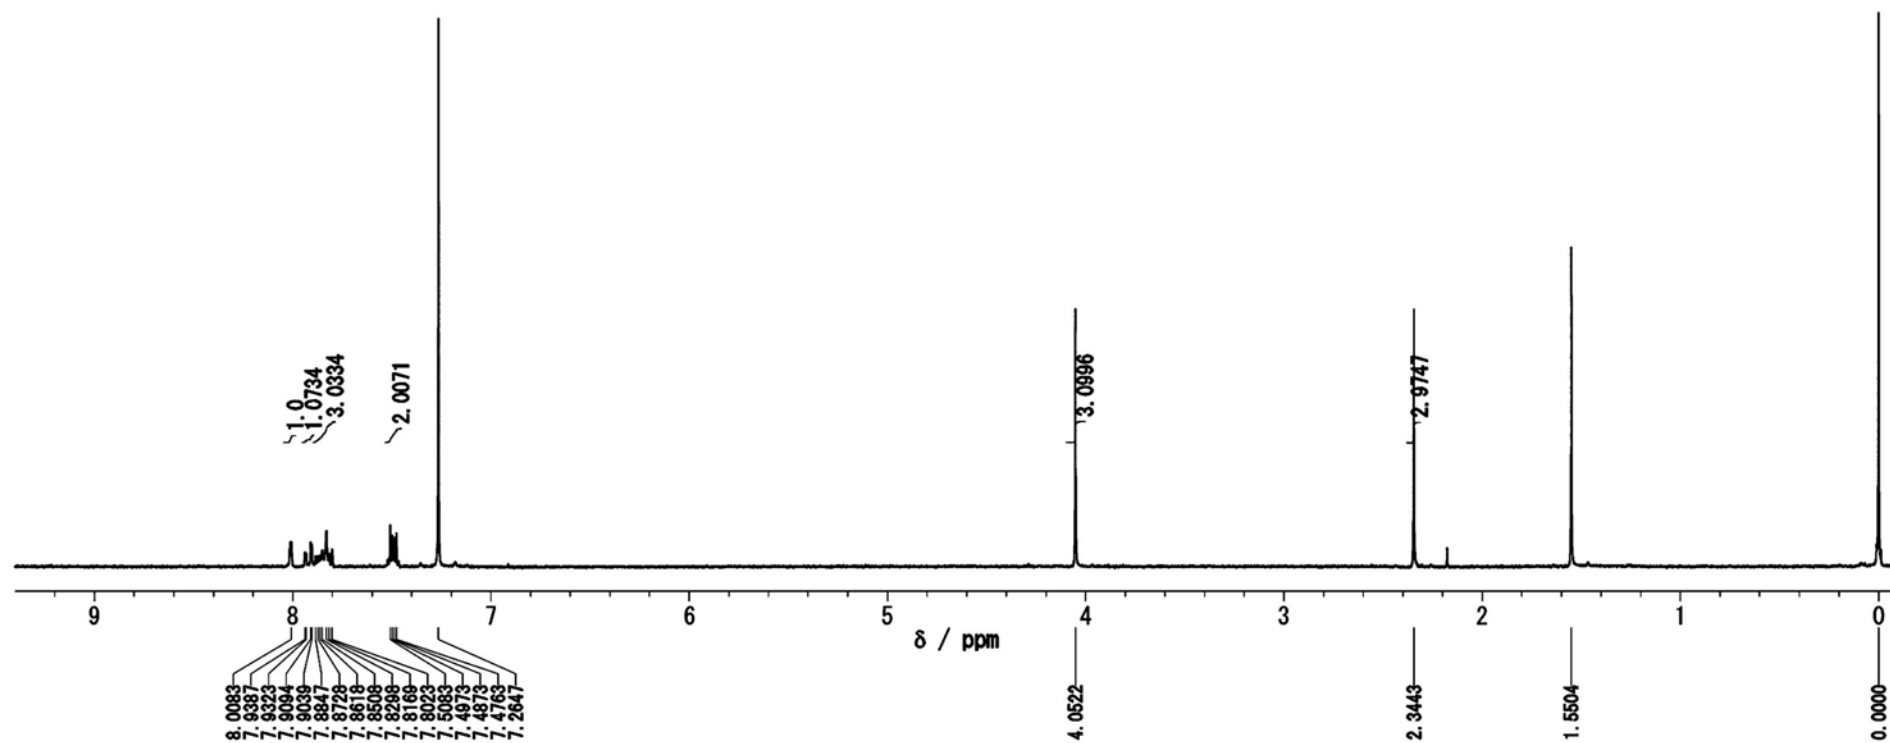

Original File:  
 Date Jul 22 11  
 Comment  
 C13 Statdard Observe  
 Stick=none Tune=6.4 Match=0.4

ObsNuc <sup>13</sup>C  
 ExMode NON  
 ObsFreq 75.43 MHz  
 ObsSet -1.0 kHz  
 ObsFine 996.3672 Hz  
 Point 32768  
 Frequency (Span) 18761.73 Hz  
 Scan 256  
 AcqTime 1.4992 s  
 PD 1.501 s  
 Pulsel 6.0  $\mu$ s  
 Temperature 29.0  $^{\circ}$ C  
 Solvent CDCl<sub>3</sub>  
 Reference 77.0 ppm  
 Broad Factor 0.2863 Hz  
 RGain 30  
 Printed 2011/Jul/28 15:35:54  
 Operator

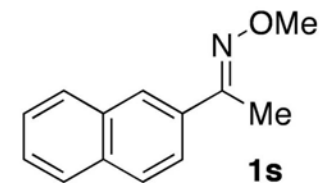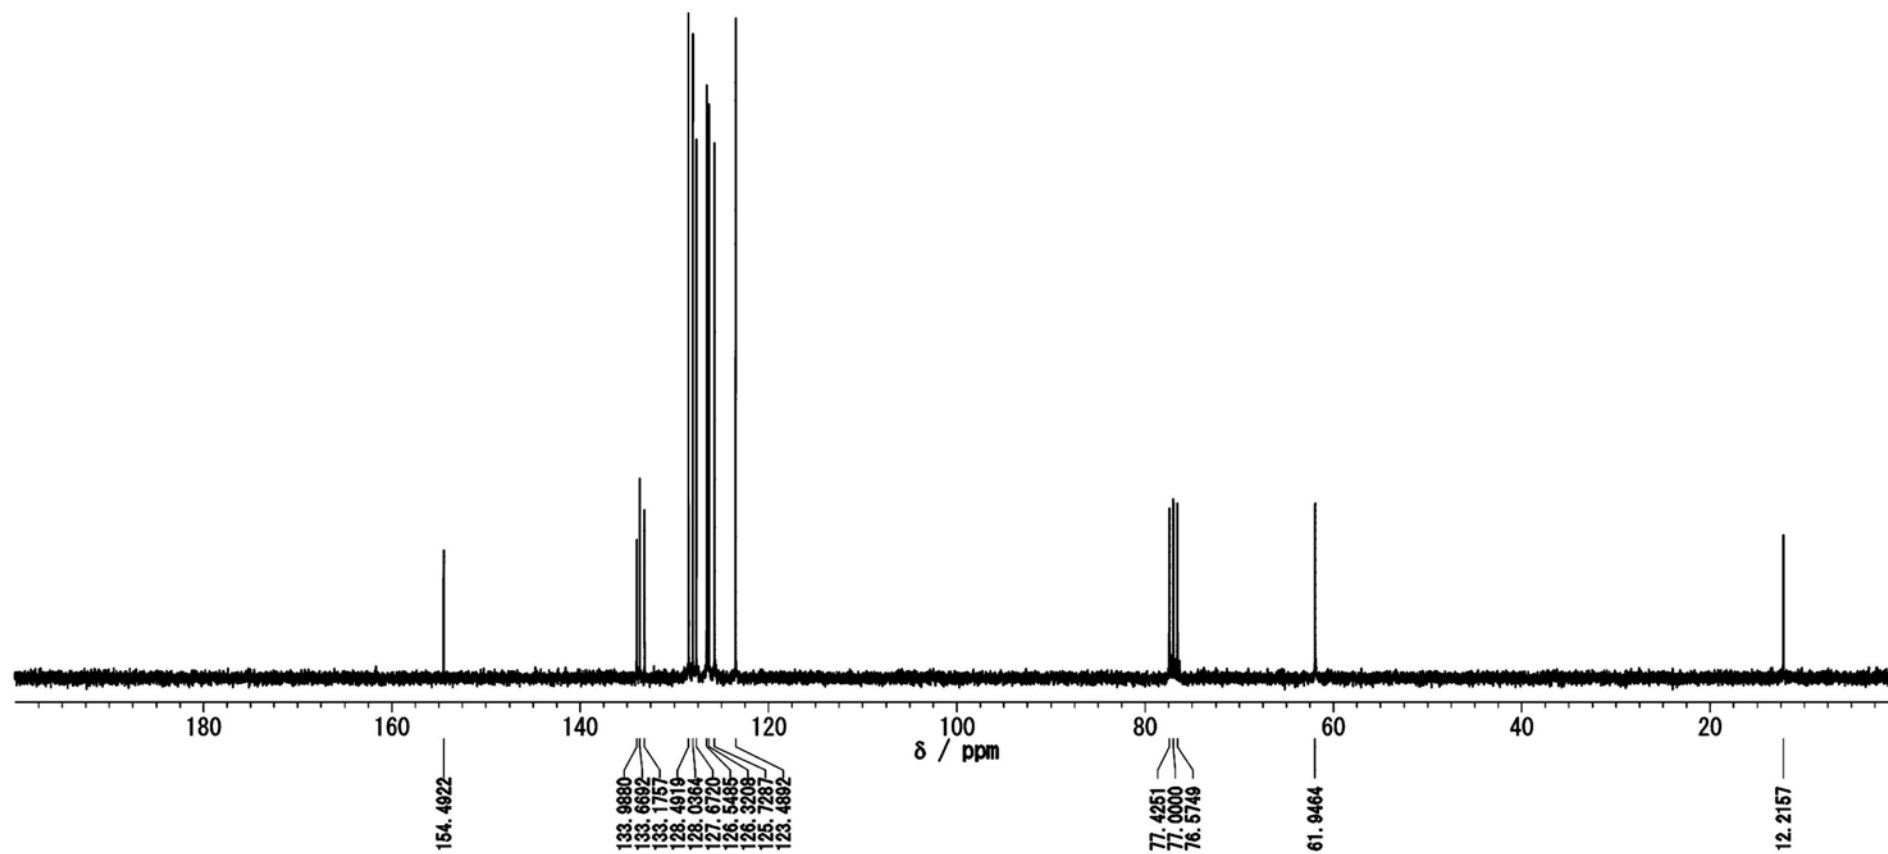

Original File:  
 Date Aug 30 11  
 Comment  
 STANDARD 1H OBSERVE

|                  |                      |
|------------------|----------------------|
| ObsNuc           | <sup>1</sup> H       |
| ExMode           | NON                  |
| ObsFreq          | 299.96 MHz           |
| ObsSet           | -1.0 kHz             |
| ObsPine          | 995.0047 Hz          |
| Point            | 16384                |
| Frequency (Span) | 4500.45 Hz           |
| Scan             | 32                   |
| AcqTime          | 3.4983 s             |
| PD               | 1.502 s              |
| Pulse1           | 6.0 μs               |
| Temperature      | 29.0 °C              |
| Solvent          | CDCl <sub>3</sub>    |
| Reference        | 0.0 ppm              |
| Broad. Factor    | 0.1373 Hz            |
| RGain            | 28                   |
| Printed          | 2011/Sep/03 20:27:02 |
| Operator         |                      |

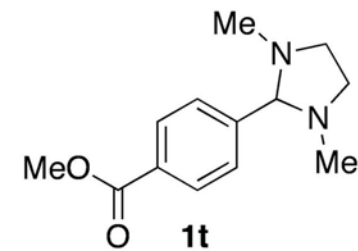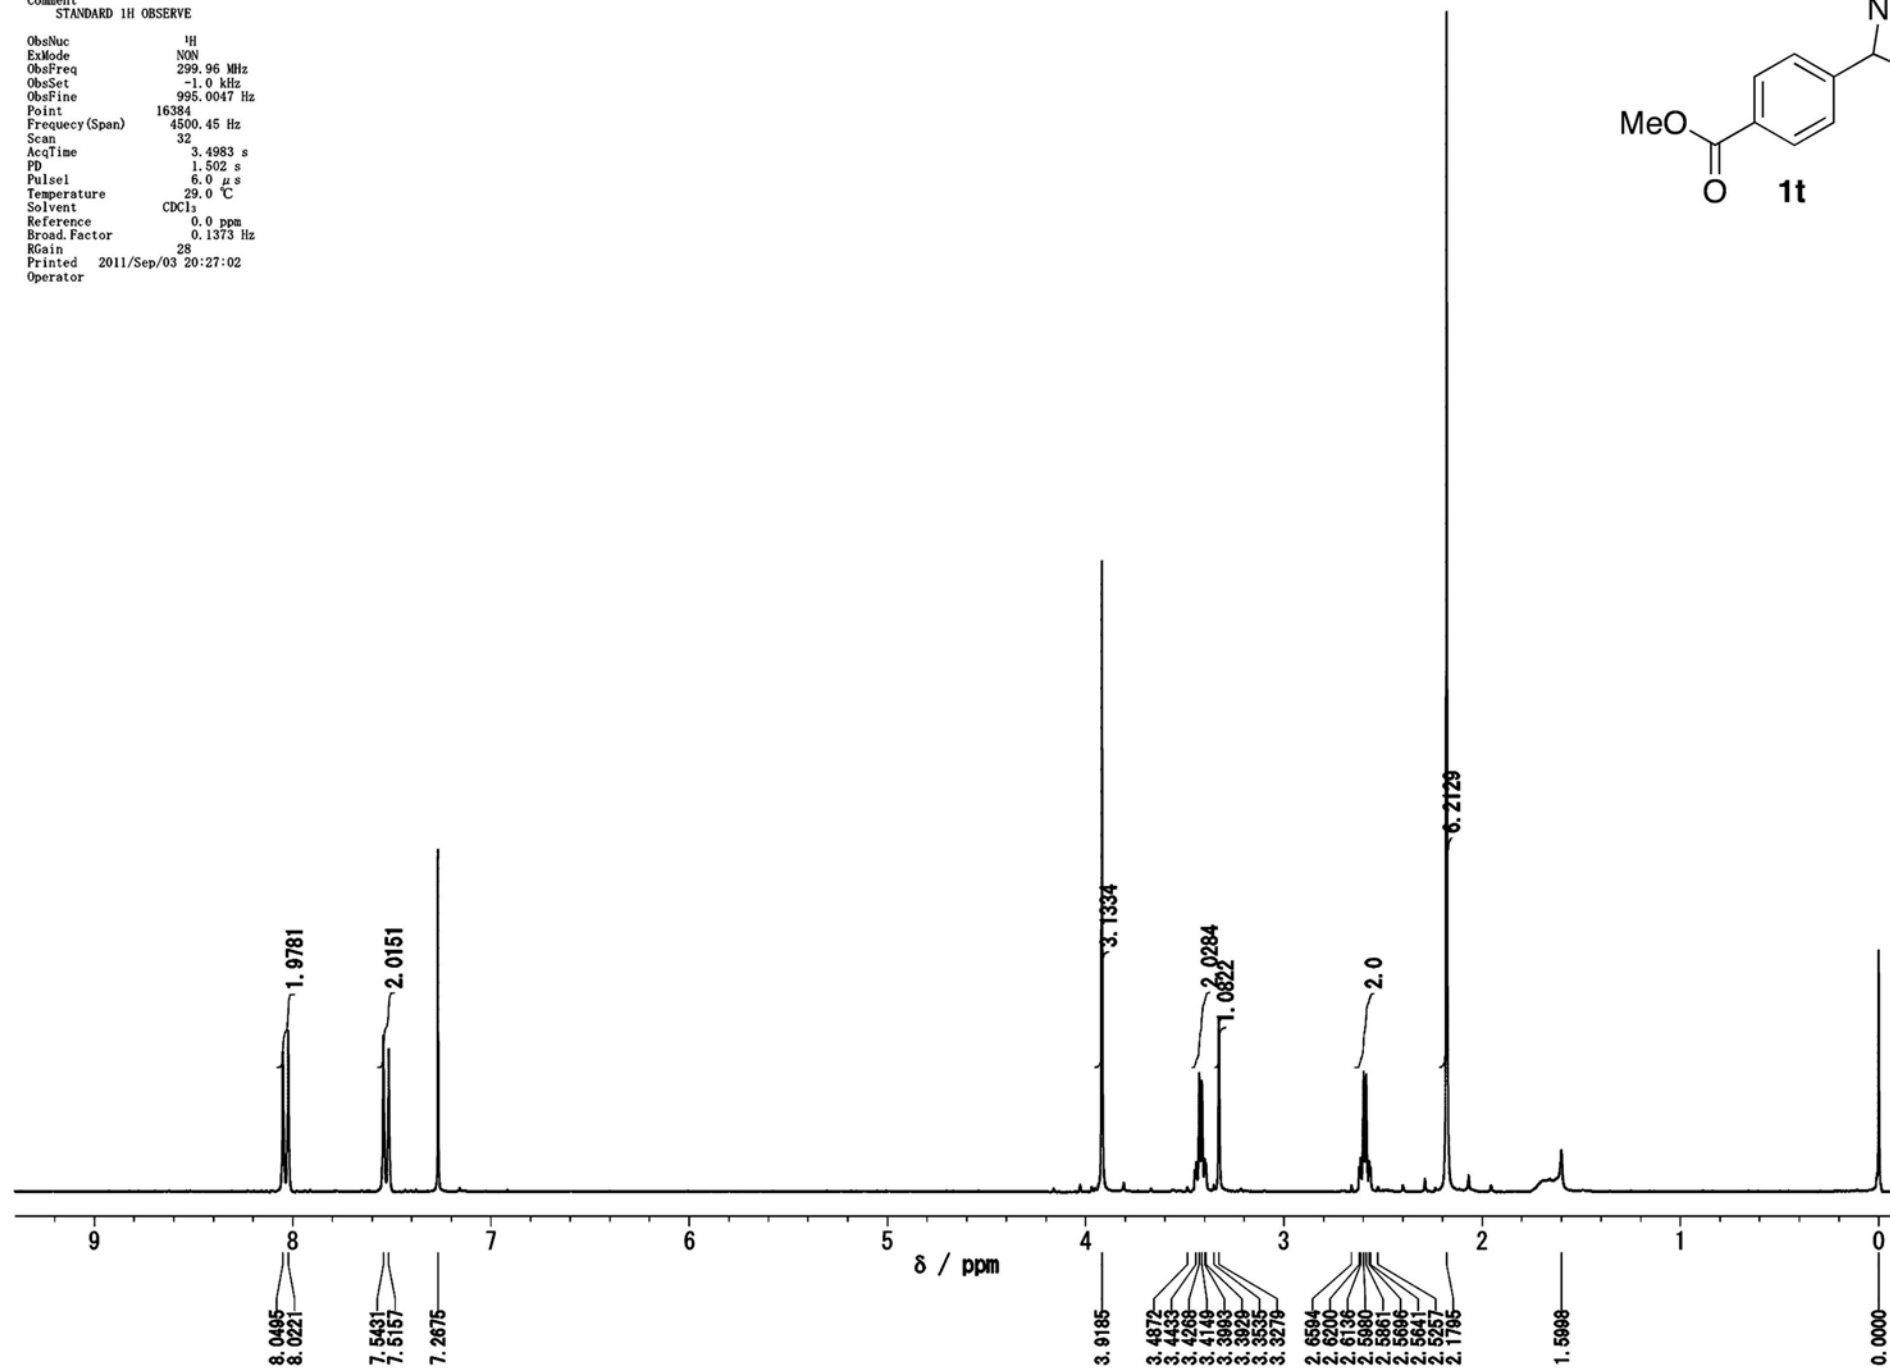

Original File:  
 Date Aug 30 11  
 Comment  
 C13 Statdard Observe  
 Stick=none Tune=6.4 Match=0.4

ObsNuc <sup>13</sup>C  
 ExMode NON  
 ObsFreq 75.43 MHz  
 ObsSet -1.0 kHz  
 ObsFine 996.3672 Hz  
 Point 32768  
 Frequency (Span) 18761.73 Hz  
 Scan 160  
 AcqTime 1.4992 s  
 PD 1.501 s  
 Pulsel 6.0  $\mu$ s  
 Temperature 29.0  $^{\circ}$ C  
 Solvent CDCl<sub>3</sub>  
 Reference 77.0 ppm  
 Broad.Factor 0.2863 Hz  
 RGain 30  
 Printed 2011/Sep/03 20:27:52  
 Operator

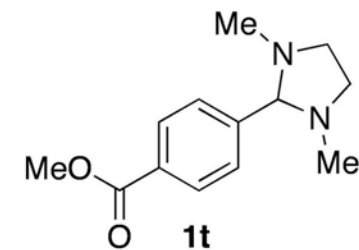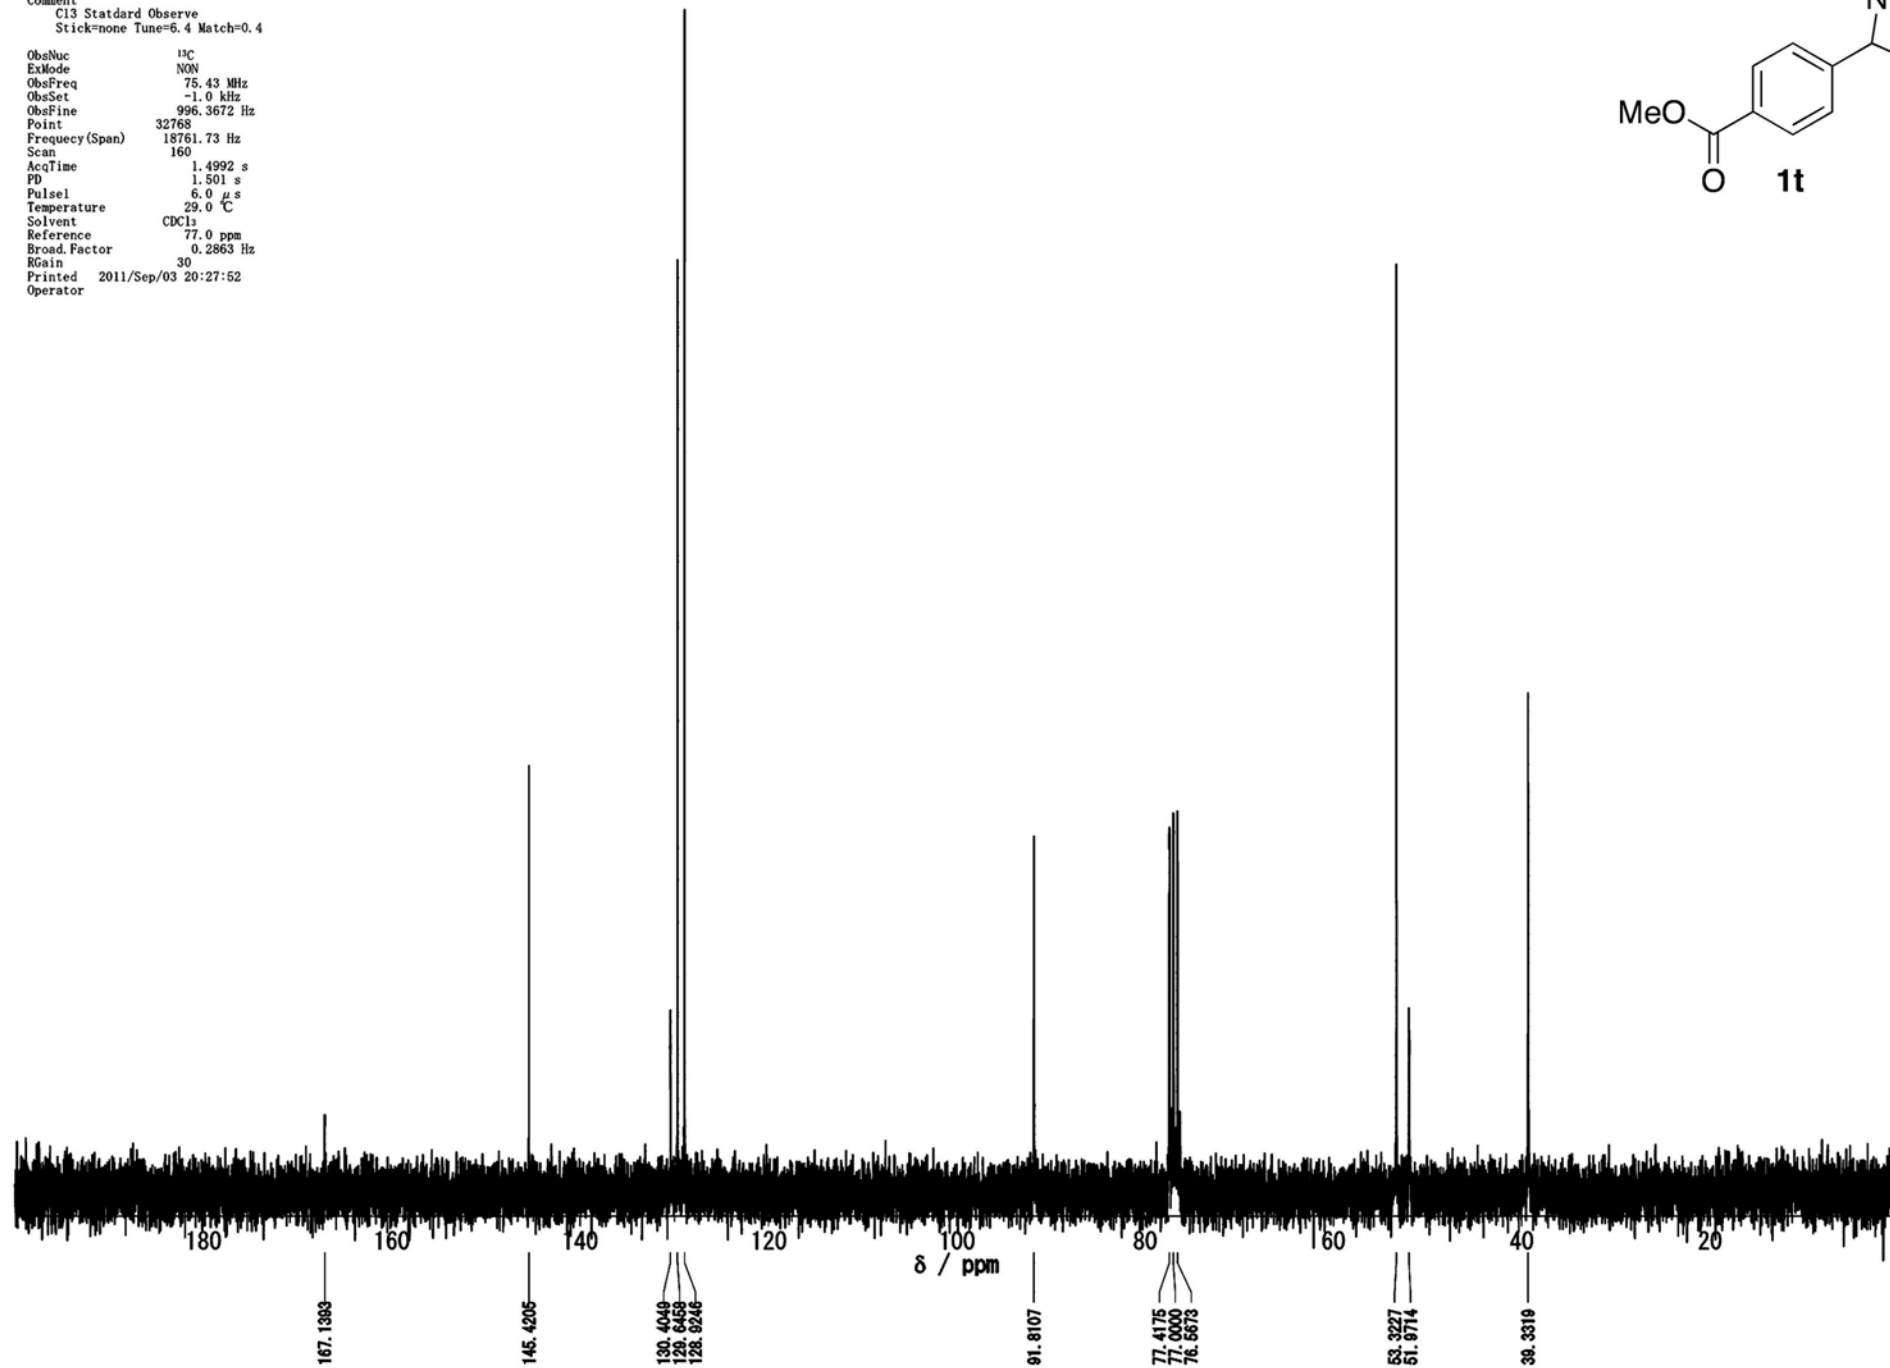

Original File:  
 Date Aug 31 11  
 Comment  
 STANDARD 1H OBSERVE

ObsNuc <sup>1</sup>H  
 ExMode NON  
 ObsFreq 299.96 MHz  
 ObsSet -1.0 kHz  
 ObsPine 995.0047 Hz  
 Point 16384  
 Frequency (Span) 4500.45 Hz  
 Scan 16  
 AcqTime 3.4983 s  
 PD 1.502 s  
 Pulse 6.0  $\mu$ s  
 Temperature 29.0  $^{\circ}$ C  
 Solvent CDCl<sub>3</sub>  
 Reference 0.0 ppm  
 Broad Factor 0.1373 Hz  
 RGain 12  
 Printed 2011/Sep/03 20:29:56  
 Operator

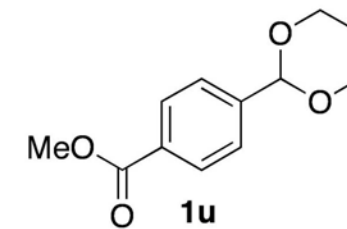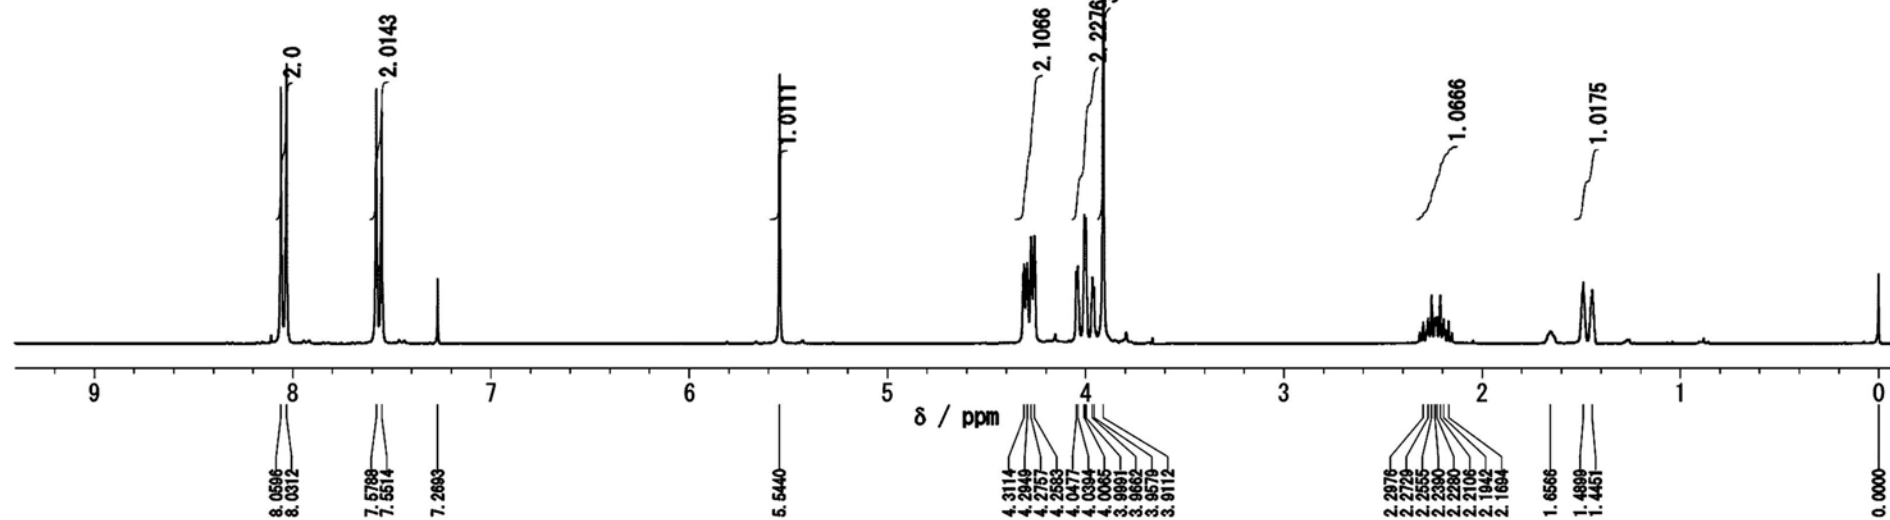

Original File:  
 Date Aug 31 11  
 Comment  
 C13 Statdard Observe  
 Stick=none Tune=6.4 Match=0.4

ObsNuc <sup>13</sup>C  
 ExMode NON  
 ObsFreq 75.43 MHz  
 ObsSet -1.0 kHz  
 ObsFine 996.3672 Hz  
 Point 32768  
 Frequency (Span) 18761.73 Hz  
 Scan 224  
 AcqTime 1.4992 s  
 PD 1.501 s  
 Pulse 6.0 μs  
 Temperature 29.0 °C  
 Solvent CDCl<sub>3</sub>  
 Reference 77.0 ppm  
 Broad Factor 0.2863 Hz  
 RGain 30  
 Printed 2011/Sep/03 20:29:09  
 Operator

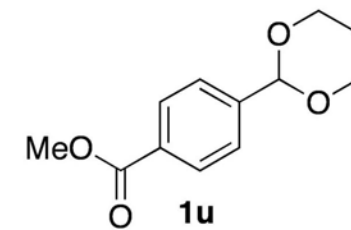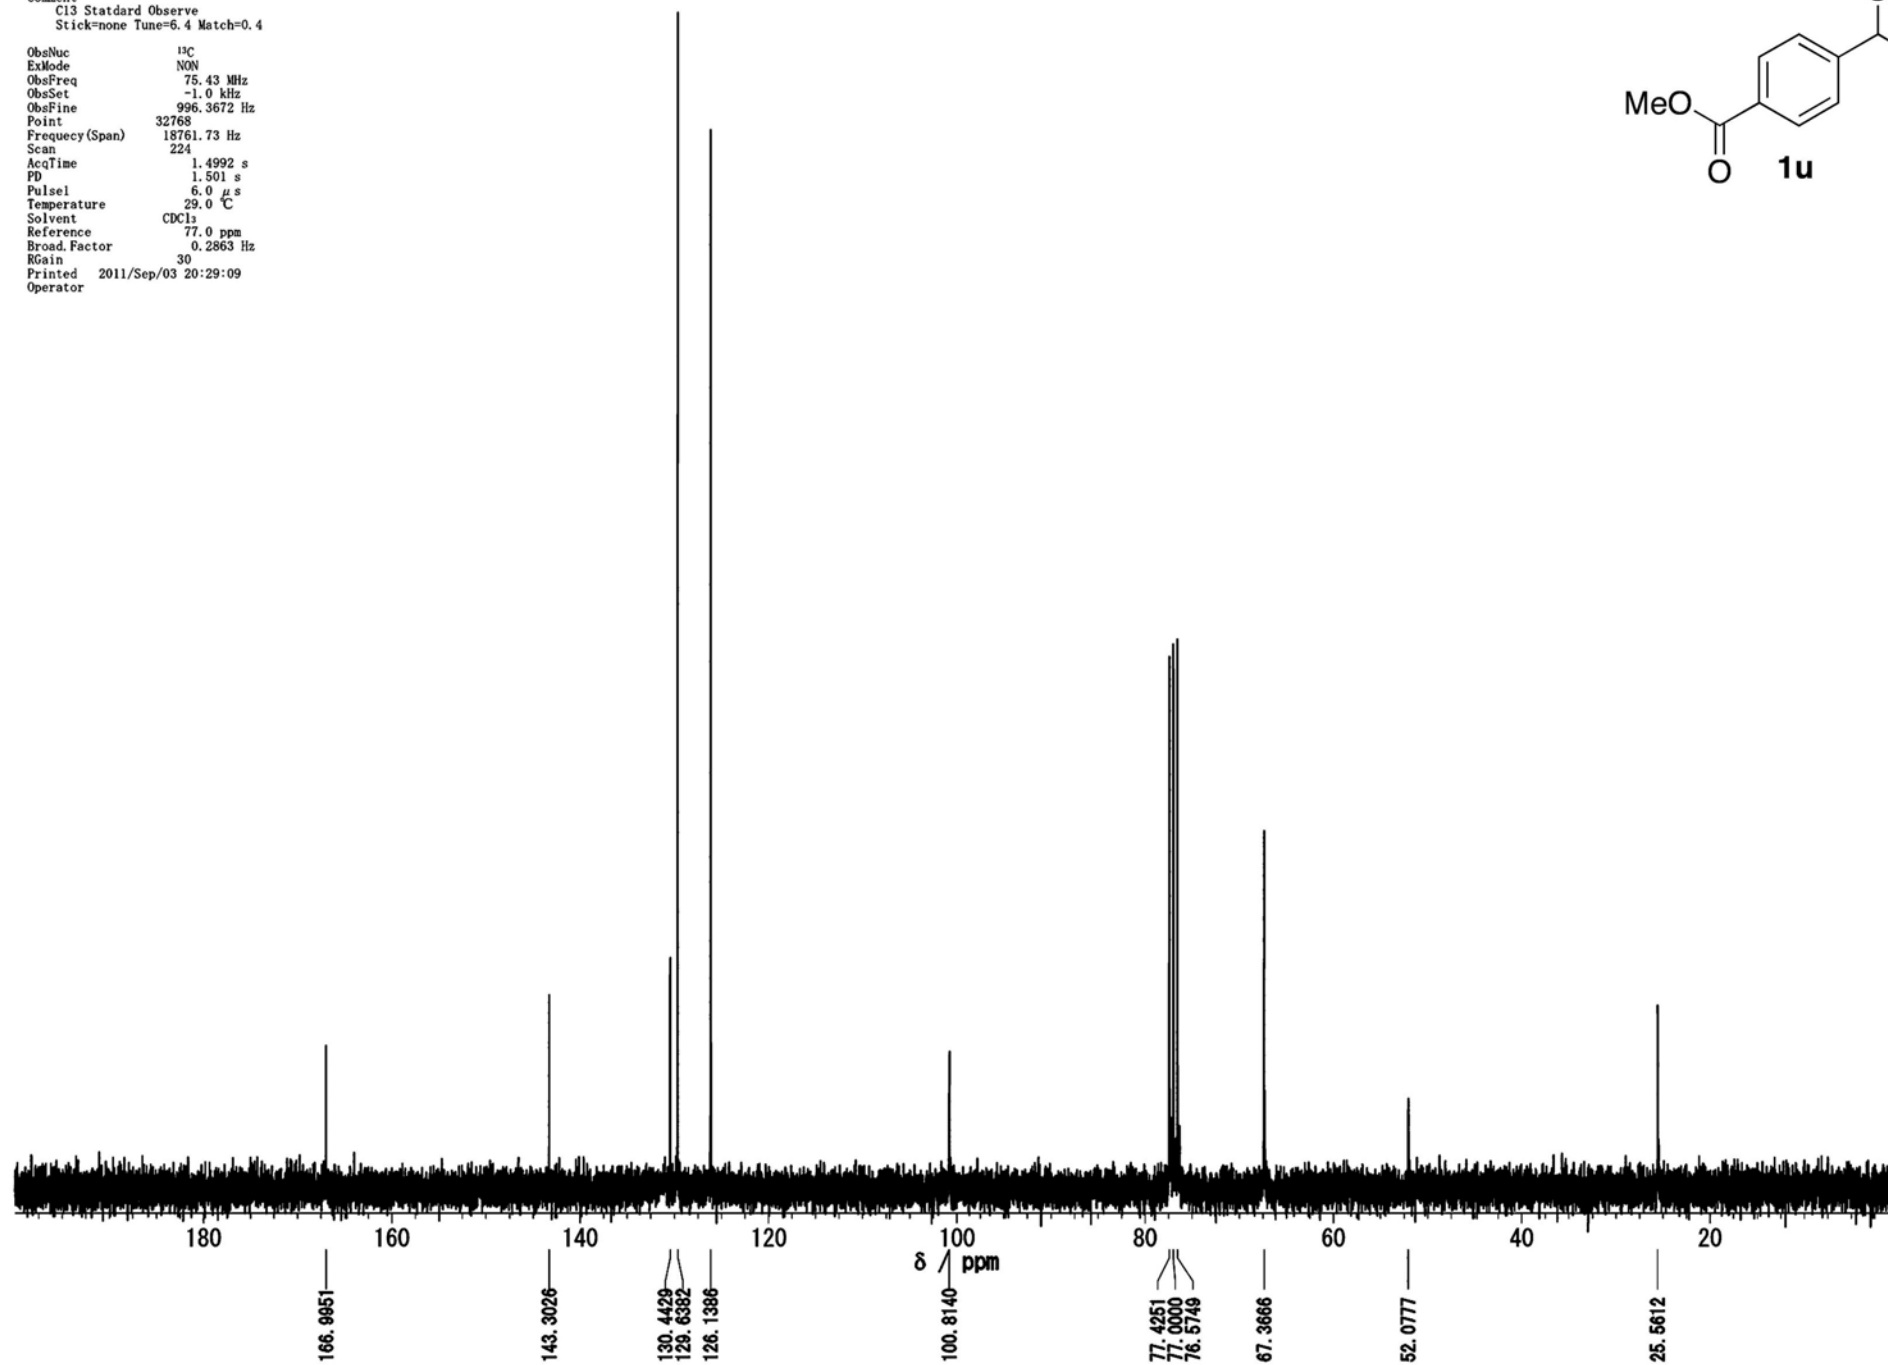

Original File:  
 Date Jul 11 11  
 Comment  
 STANDARD 1H OBSERVE

|                  |                      |
|------------------|----------------------|
| ObsNuc           | 1H                   |
| ExMode           | NON                  |
| ObsFreq          | 299.96 MHz           |
| ObsSet           | -1.0 kHz             |
| ObsFine          | 995.0047 Hz          |
| Point            | 16384                |
| Frequency (Span) | 4500.45 Hz           |
| Scan             | 16                   |
| AcqTime          | 3.4983 s             |
| PD               | 1.502 s              |
| Pulse1           | 6.0 $\mu$ s          |
| Temperature      | 29.0 $^{\circ}$ C    |
| Solvent          | CDCl <sub>3</sub>    |
| Reference        | 0.0 ppm              |
| Broad. Factor    | 0.1373 Hz            |
| RGain            | 30                   |
| Printed          | 2011/Sep/03 22:23:04 |
| Operator         |                      |

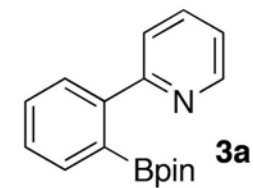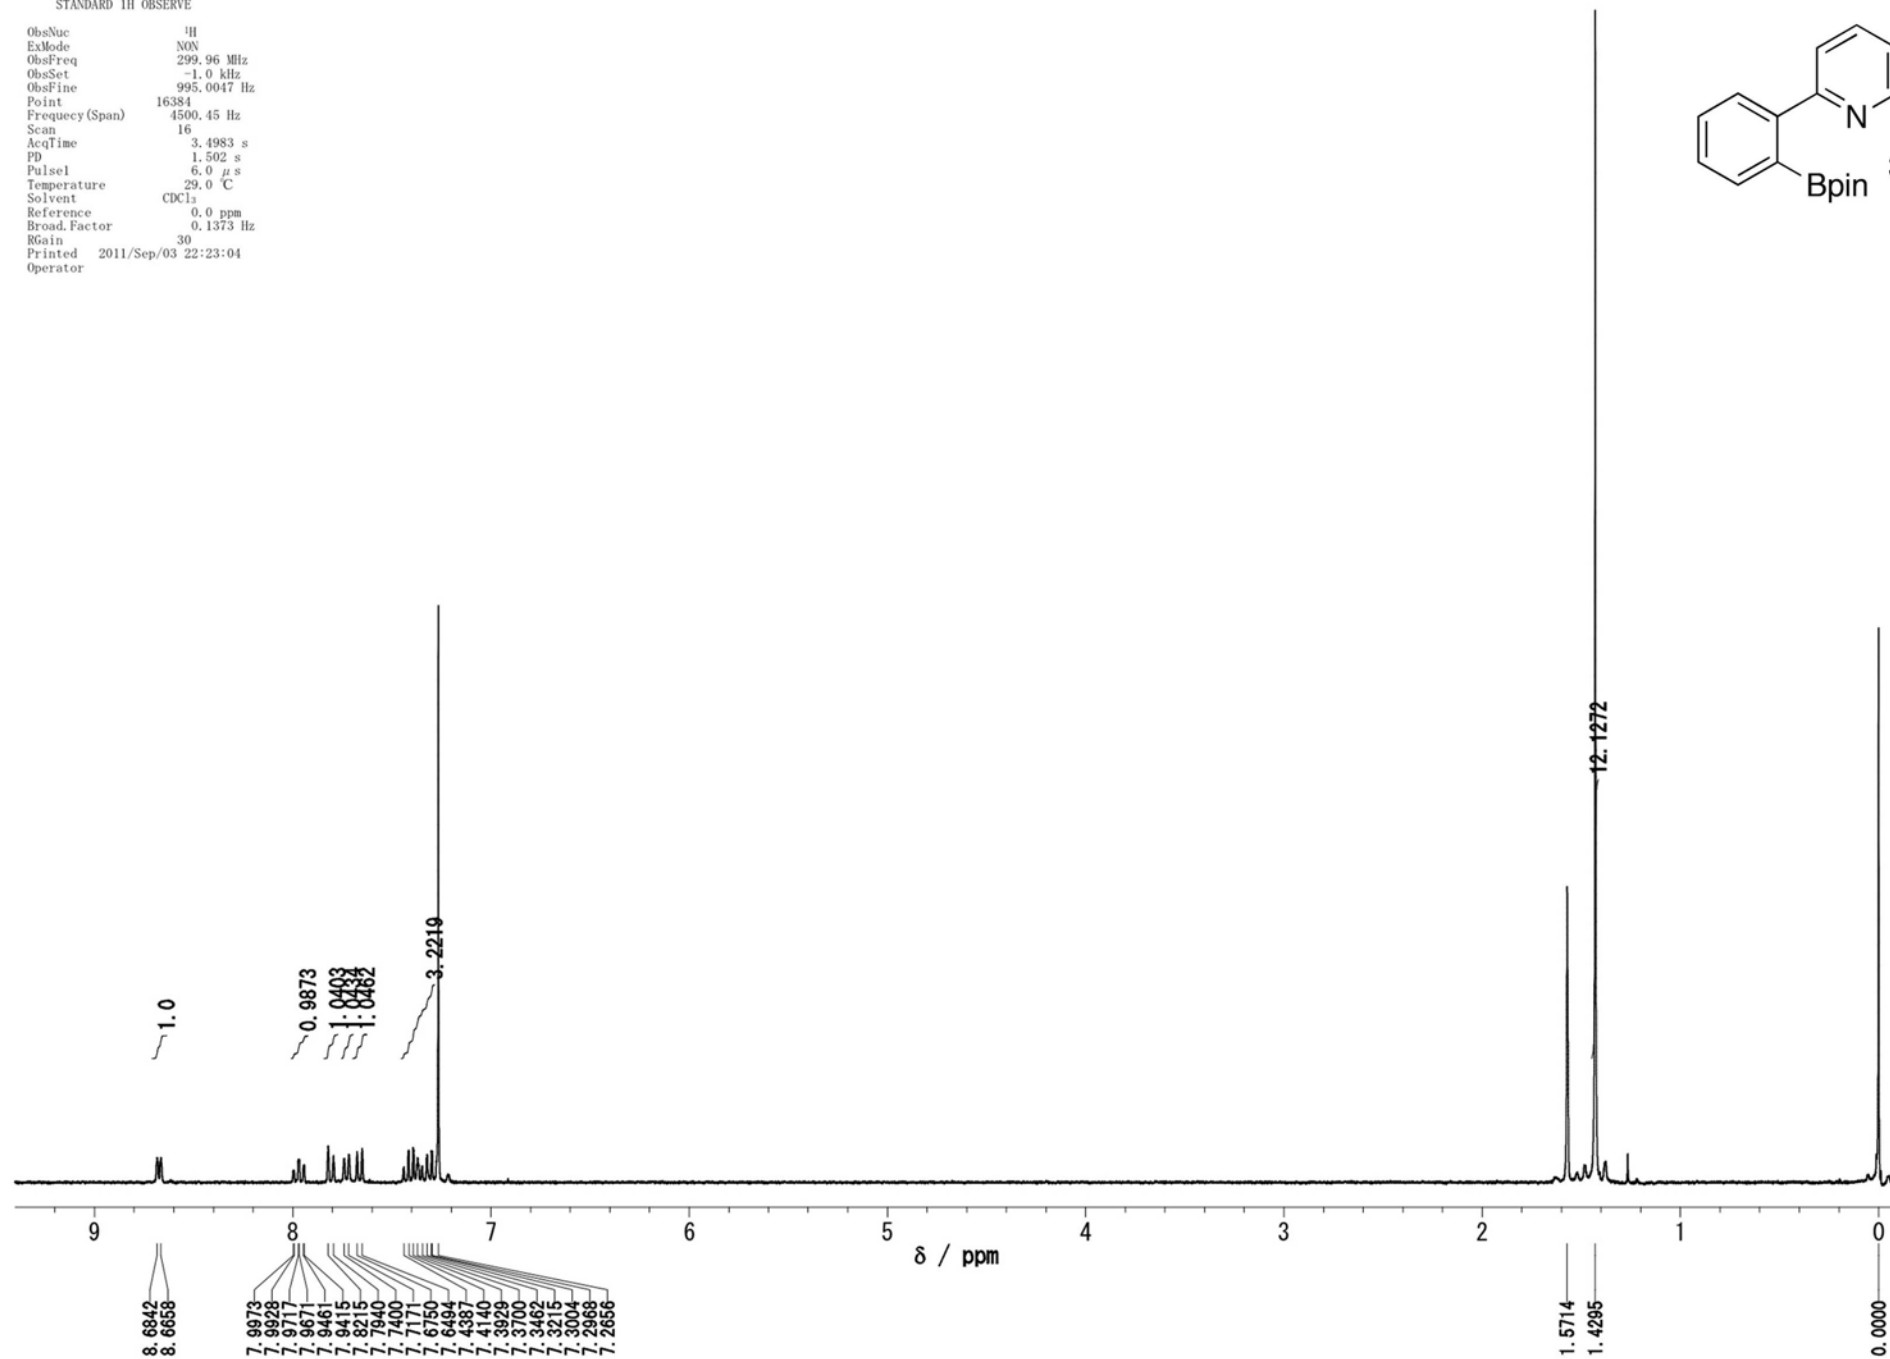

Original File:  
Date Jul 11 11  
Comment  
C13 Statdard Observe  
Stick=none Tune=6.4 Match=0.4

ObsNuc  $^{13}\text{C}$   
ExMode NON  
ObsFreq 75.43 MHz  
ObsSet -1.0 kHz  
ObsFine 996.3672 Hz  
Point 32768  
Frequency (Span) 18761.73 Hz  
Scan 896  
AcqTime 1.4992 s  
PD 1.501 s  
Pulse1 6.0  $\mu\text{s}$   
Temperature 29.0  $^{\circ}\text{C}$   
Solvent  $\text{CDCl}_3$   
Reference 77.0 ppm  
Broad.Factor 0.2863 Hz  
RGain 30  
Printed 2011/Aug/29 01:29:50  
Operator

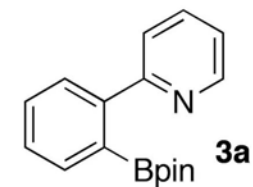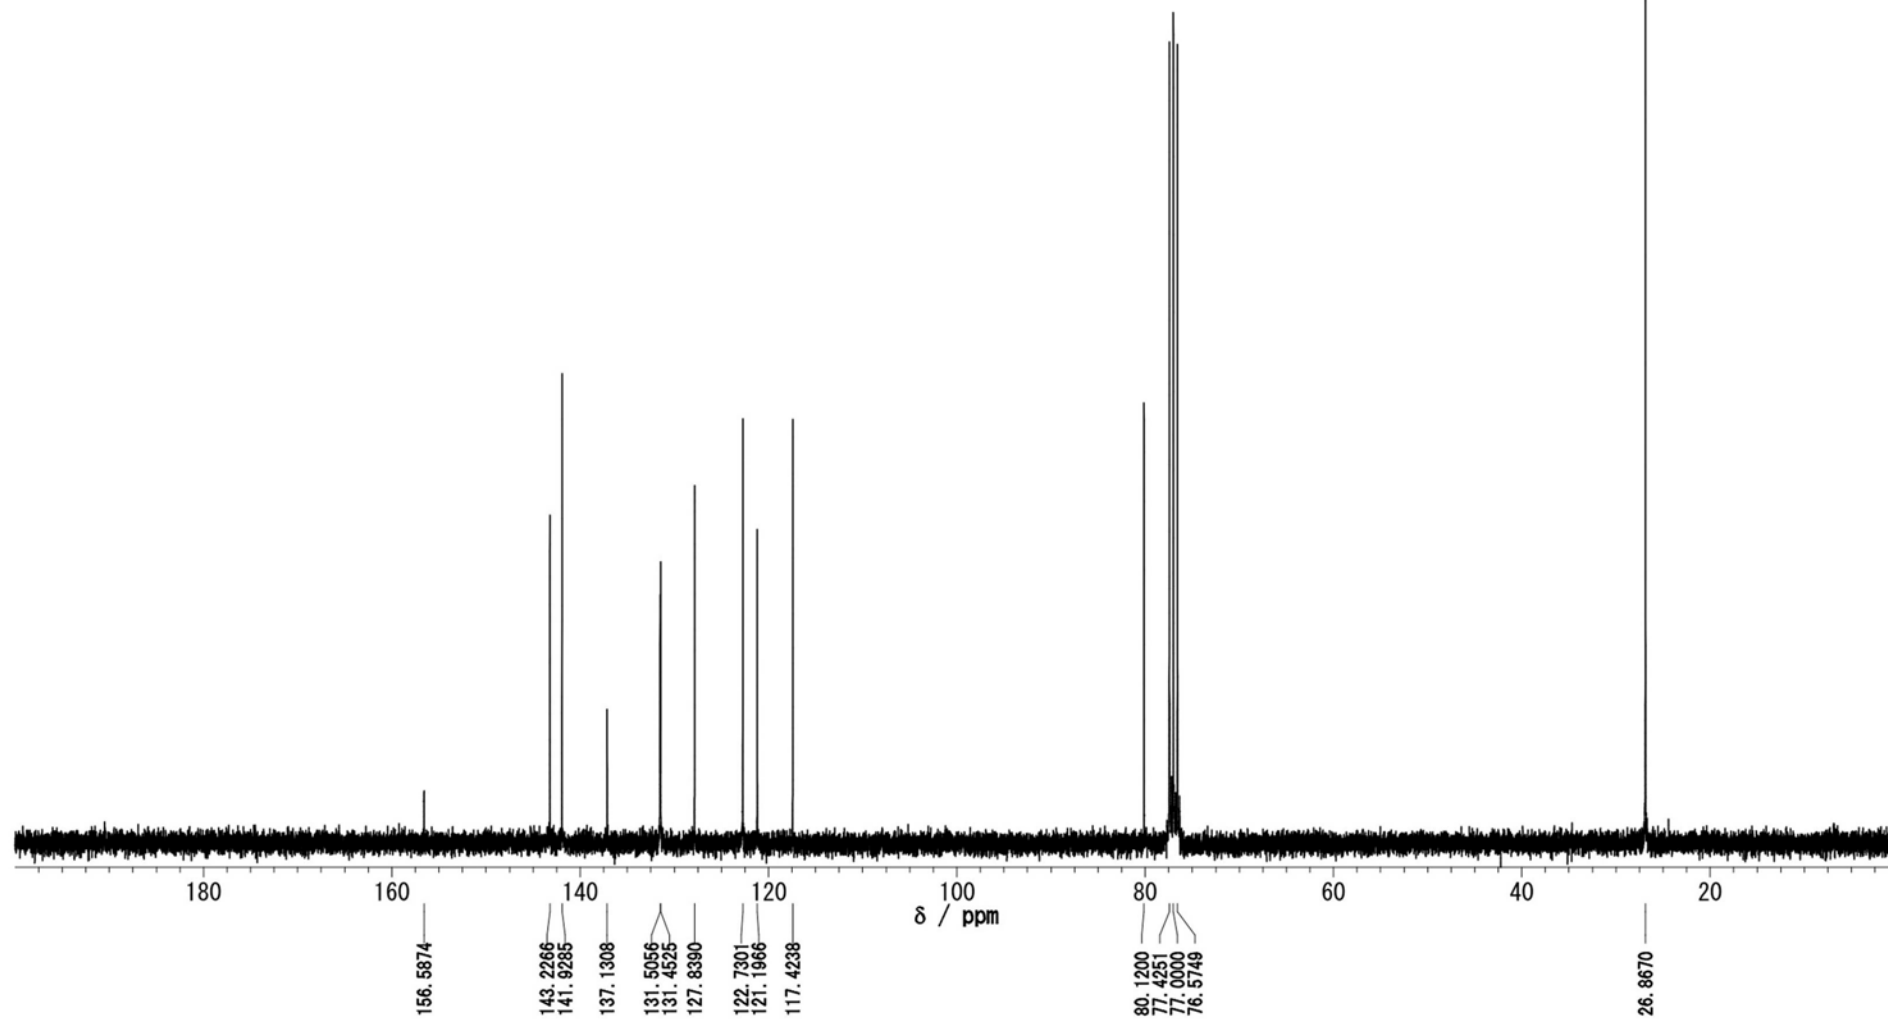



Original File:  
 Date May 31 11  
 Comment  
 STANDARD 1H OBSERVE

|                  |                      |
|------------------|----------------------|
| ObsNuc           | <sup>1</sup> H       |
| ExMode           | NON                  |
| ObsFreq          | 299.96 MHz           |
| ObsSet           | -1.0 kHz             |
| ObsFine          | 995.0047 Hz          |
| Point            | 16384                |
| Frequency (Span) | 4500.45 Hz           |
| Scan             | 16                   |
| AcqTime          | 3.4983 s             |
| PD               | 1.502 s              |
| Pulse1           | 6.0 $\mu$ s          |
| Temperature      | 29.0 $^{\circ}$ C    |
| Solvent          | CDCl <sub>3</sub>    |
| Reference        | 0.0 ppm              |
| Broad.Factor     | 0.1373 Hz            |
| RGain            | 30                   |
| Printed          | 2011/Aug/29 01:31:40 |
| Operator         |                      |

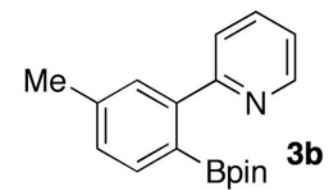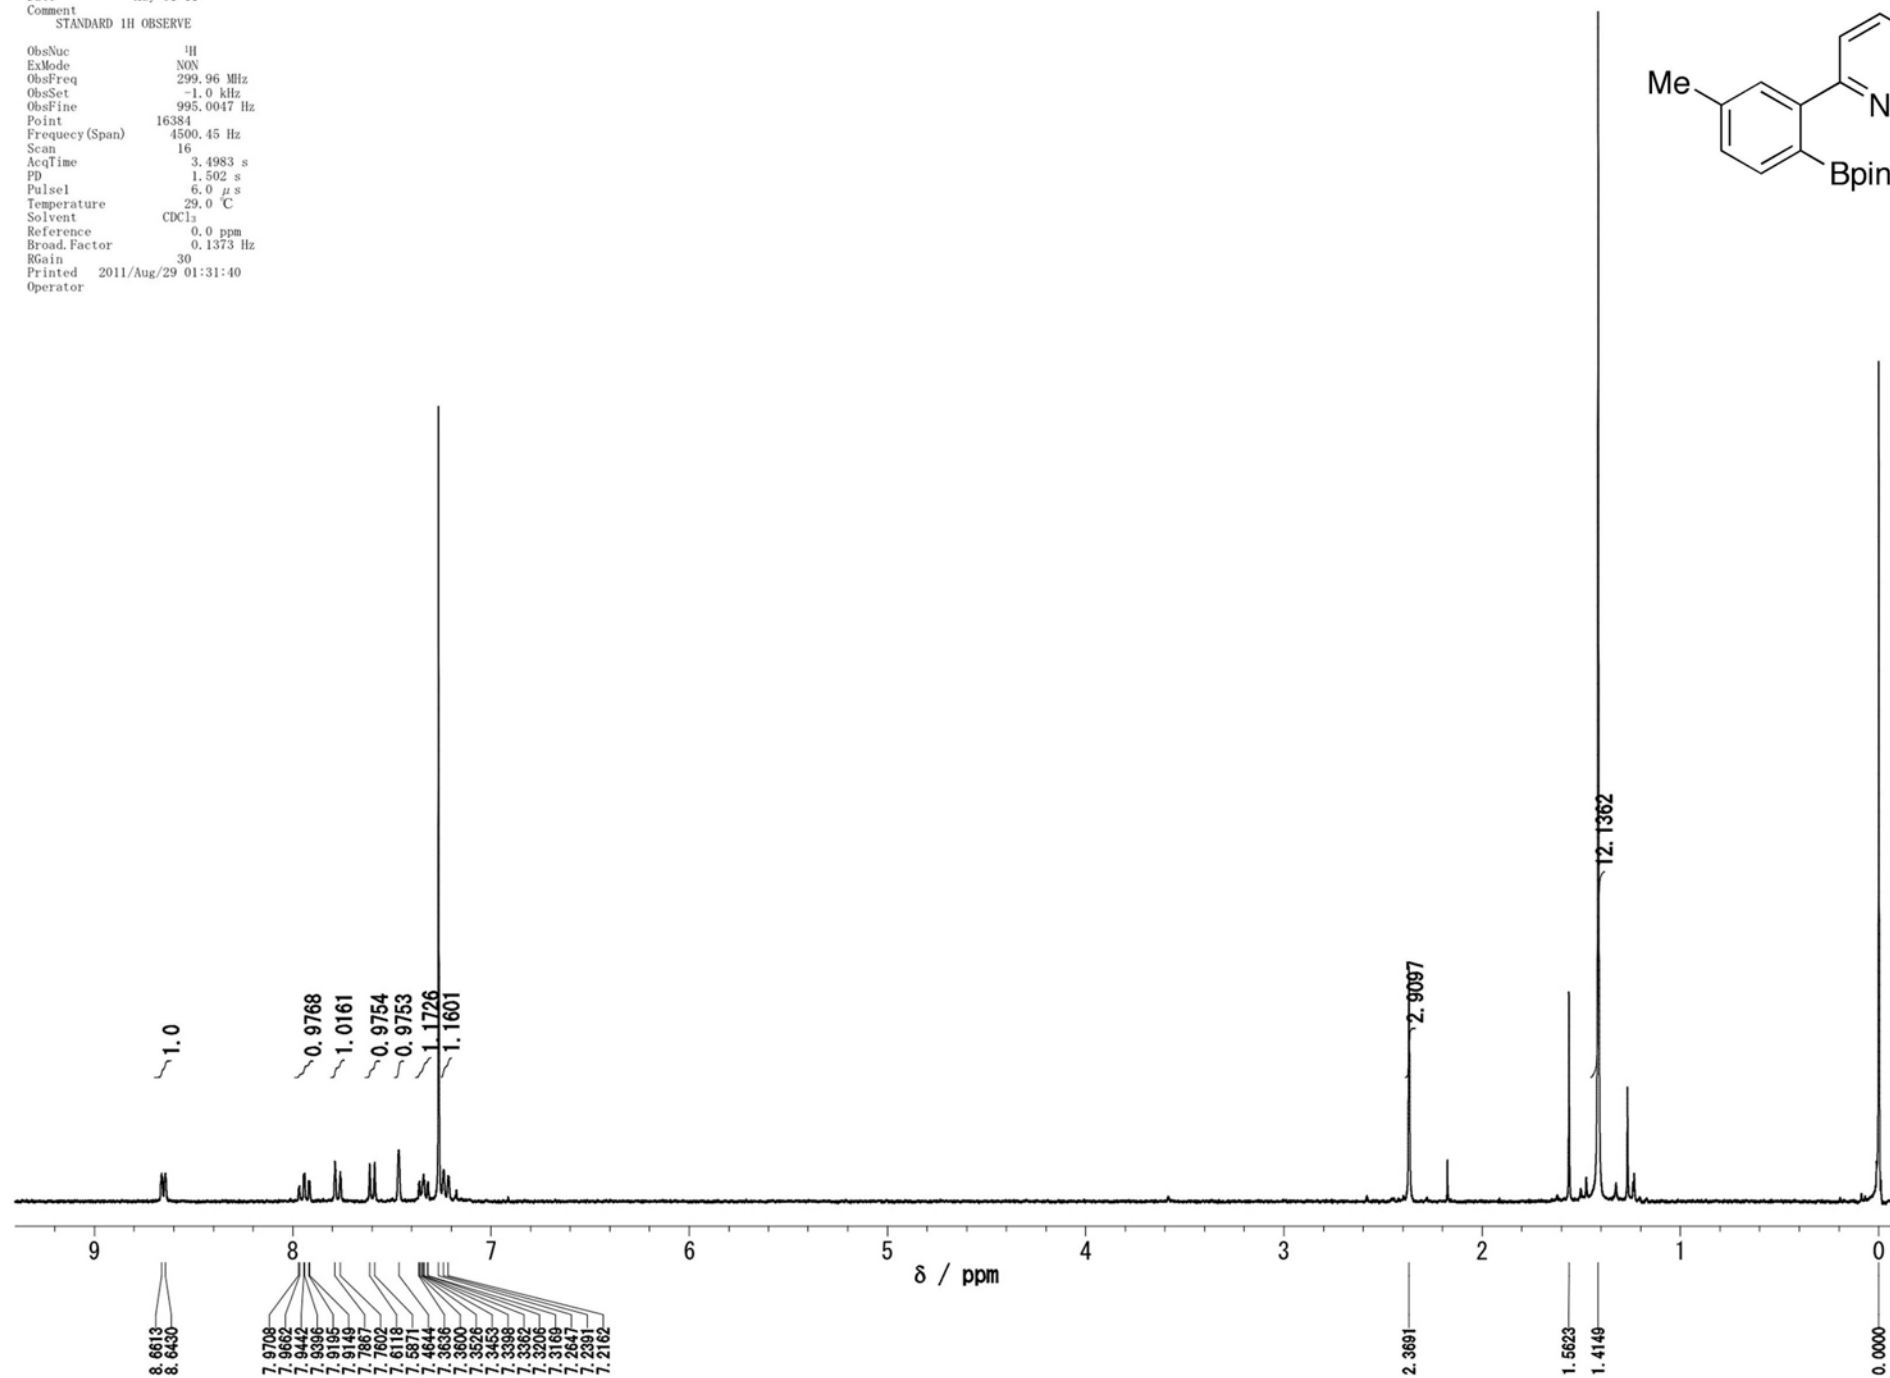

Original File:  
 Date Aug 27 11  
 Comment  
 C13 Statdard Observe  
 Stick=none Tune=6.4 Match=0.4

ObsNuc  $^{13}\text{C}$   
 ExMode NON  
 ObsFreq 75.43 MHz  
 ObsSet -1.0 kHz  
 ObsFine 996.3672 Hz  
 Point 32768  
 Frequency (Span) 18761.73 Hz  
 Scan 912  
 AcqTime 1.4992 s  
 PD 1.501 s  
 Pulse1 6.0  $\mu\text{s}$   
 Temperature 29.0  $^{\circ}\text{C}$   
 Solvent  $\text{CDCl}_3$   
 Reference 77.0 ppm  
 Broad.Factor 0.2863 Hz  
 RGain 30  
 Printed 2011/Aug/29 01:33:37  
 Operator

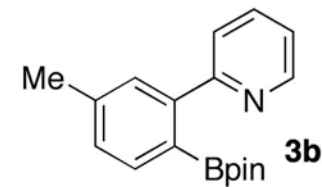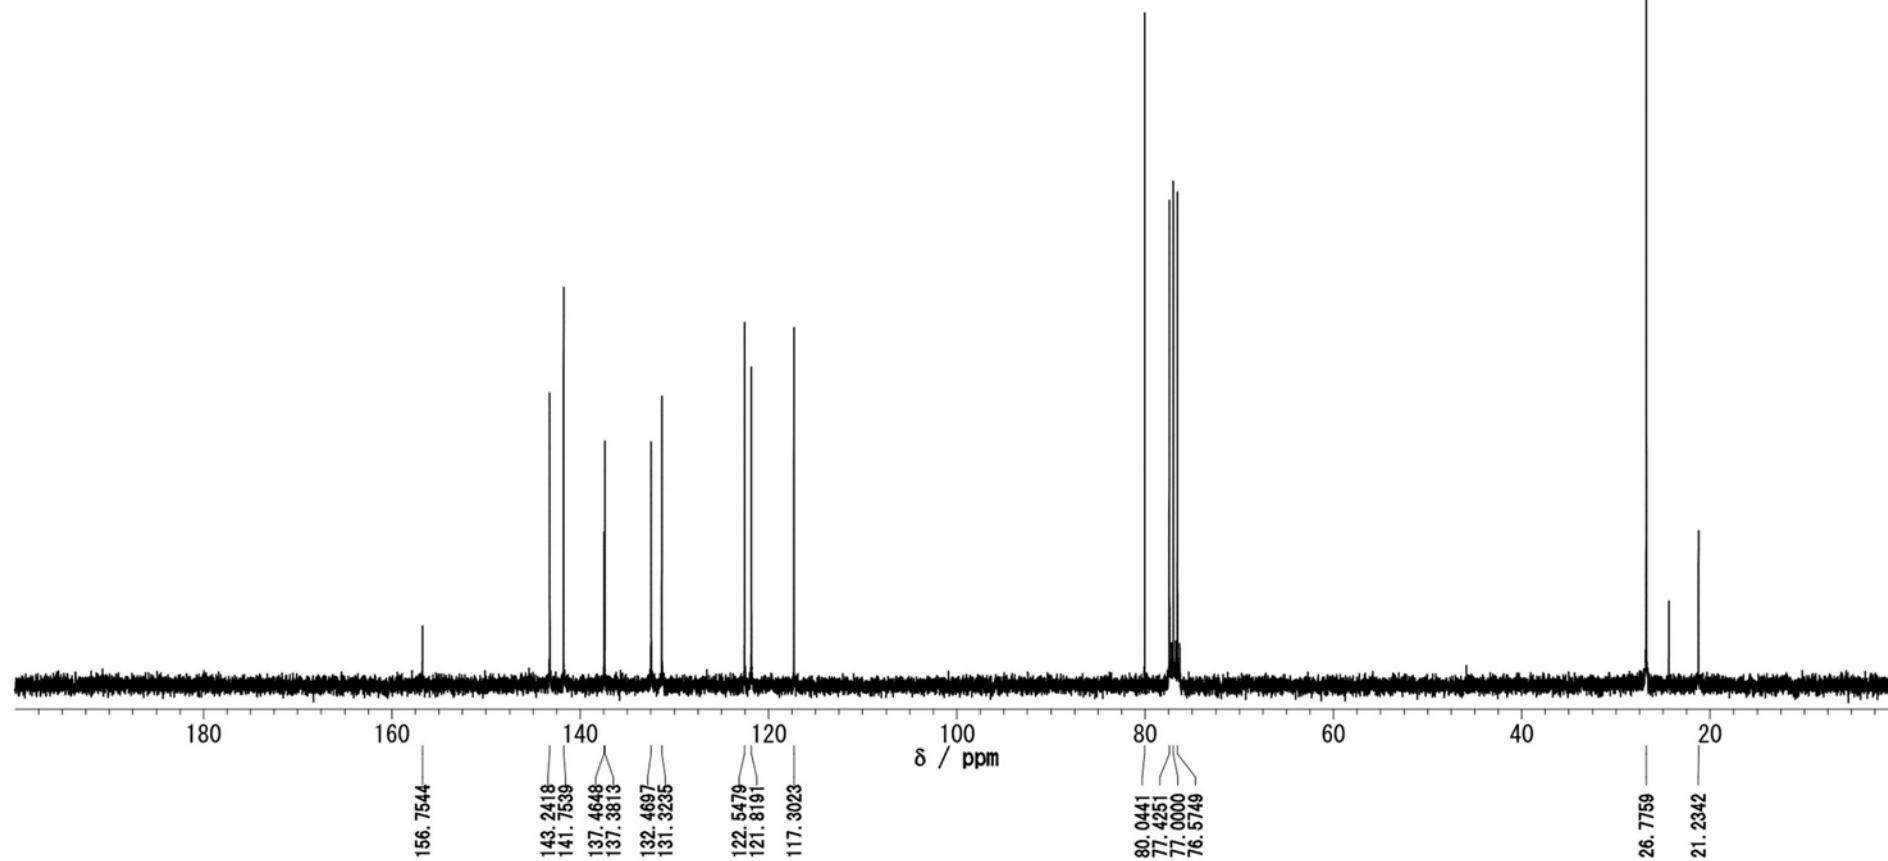

Original File: Jul 7 11  
 Date: Jul 7 11  
 Comment: STANDARD 1H OBSERVE  
 ObsNuc: <sup>1</sup>H  
 ExMode: NON  
 ObsFreq: 299.96 MHz  
 ObsSet: -1.0 kHz  
 ObsFine: 995.0047 Hz  
 Point: 16384  
 Frequency (Span): 4500.45 Hz  
 Scan: 16  
 AcqTime: 3.4983 s  
 PD: 1.502 s  
 Pulse1: 6.0  $\mu$ s  
 Temperature: 29.0  $^{\circ}$ C  
 Solvent: CDCl<sub>3</sub>  
 Reference: 0.0 ppm  
 Broad.Factor: 0.1373 Hz  
 RGain: 30  
 Printed: 2011/Aug/29 01:35:33  
 Operator:

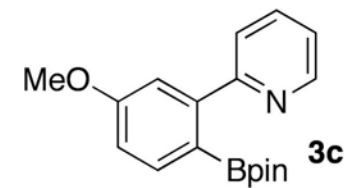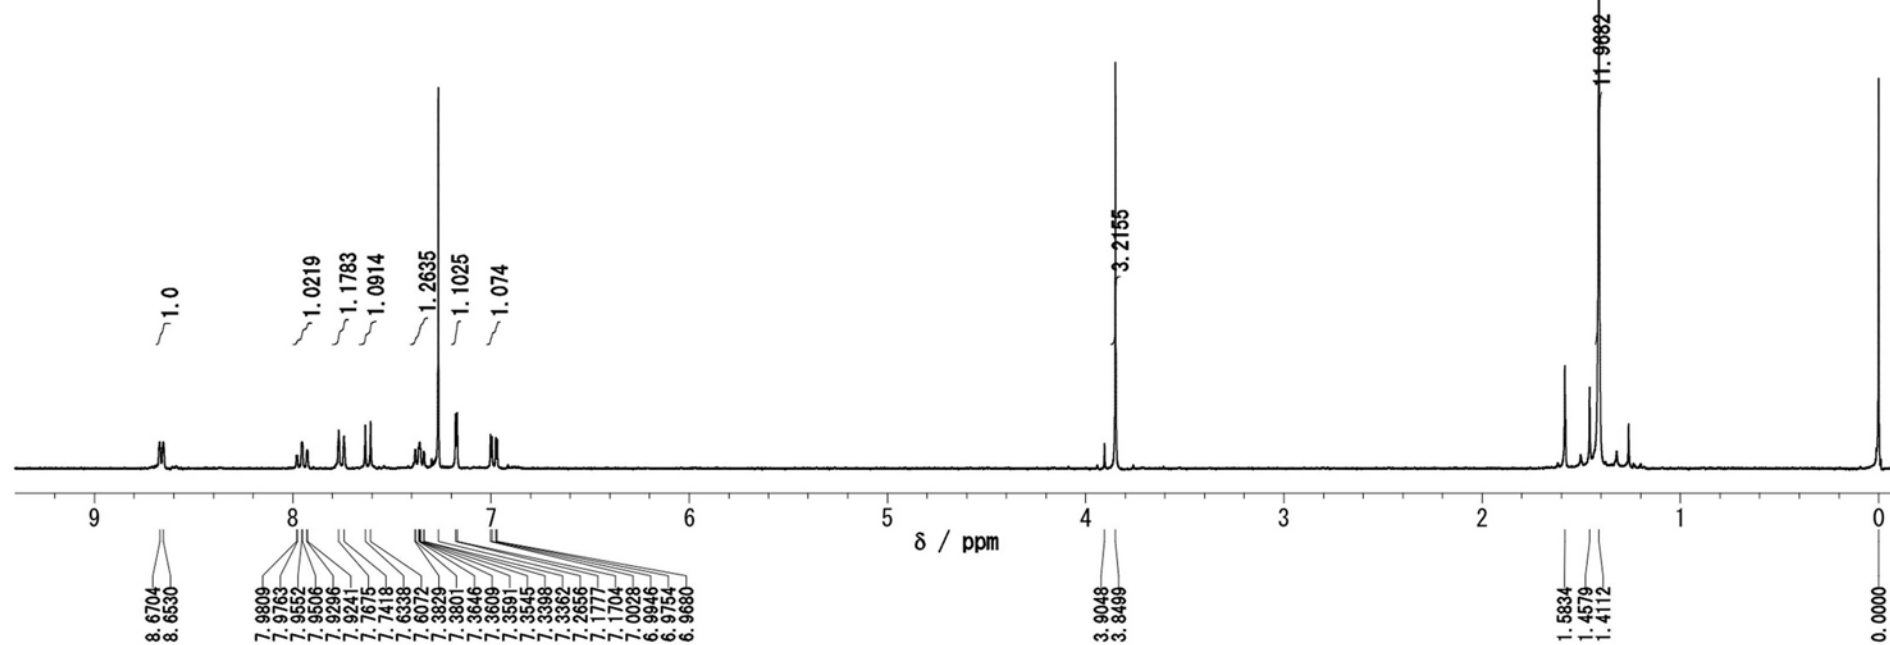

Original File:  
 Date Aug 27 11  
 Comment  
 C13 Statdard Observe  
 Stick=none Tune=6.4 Match=0.4

ObsNuc  $^{13}\text{C}$   
 ExMode NON  
 ObsFreq 75.43 MHz  
 ObsSet -1.0 kHz  
 ObsFine 996.3672 Hz  
 Point 32768  
 Frequency (Span) 18761.73 Hz  
 Scan 80  
 AcqTime 1.4992 s  
 PD 1.501 s  
 Pulse 6.0  $\mu\text{s}$   
 Temperature 29.0  $^{\circ}\text{C}$   
 Solvent  $\text{CDCl}_3$   
 Reference 77.0 ppm  
 Broad.Factor 0.2863 Hz  
 RGain 30  
 Printed 2011/Aug/29 01:37:38  
 Operator

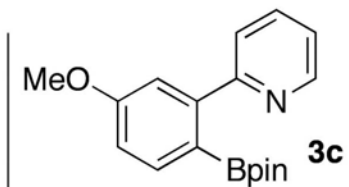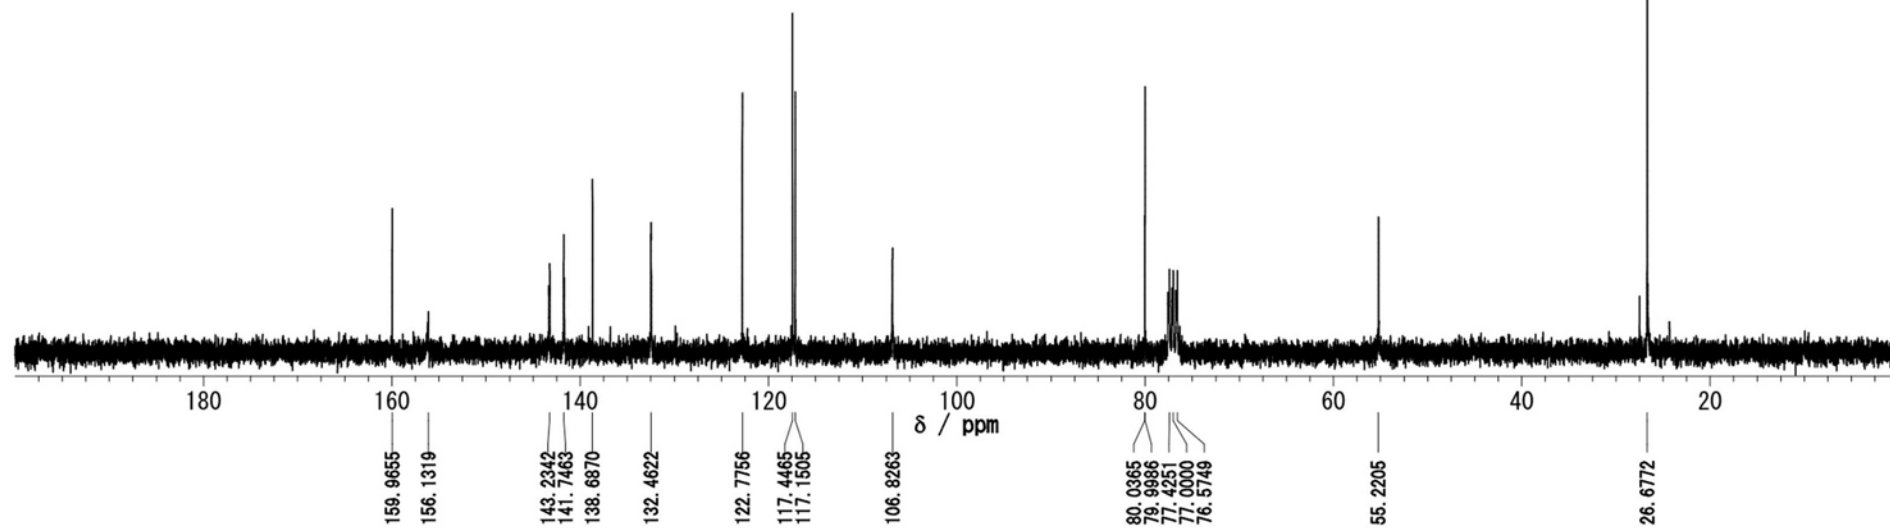

Original File:  
 Date Jul 13 11  
 Comment  
 STANDARD 1H OBSERVE

|                  |                      |
|------------------|----------------------|
| ObsNuc           | <sup>1</sup> H       |
| ExMode           | NON                  |
| ObsFreq          | 299.96 MHz           |
| ObsSet           | -1.0 kHz             |
| ObsFine          | 995.0047 Hz          |
| Point            | 16384                |
| Frequency (Span) | 4500.45 Hz           |
| Scan             | 32                   |
| AcqTime          | 3.4983 s             |
| PD               | 1.502 s              |
| Pulse1           | 6.0 $\mu$ s          |
| Temperature      | 29.0 $^{\circ}$ C    |
| Solvent          | CDCl <sub>3</sub>    |
| Reference        | 0.0 ppm              |
| Broad. Factor    | 0.1373 Hz            |
| RGain            | 30                   |
| Printed          | 2011/Aug/29 01:39:31 |
| Operator         |                      |

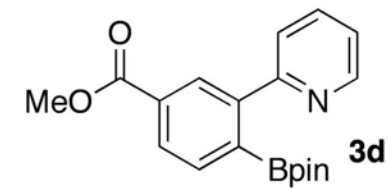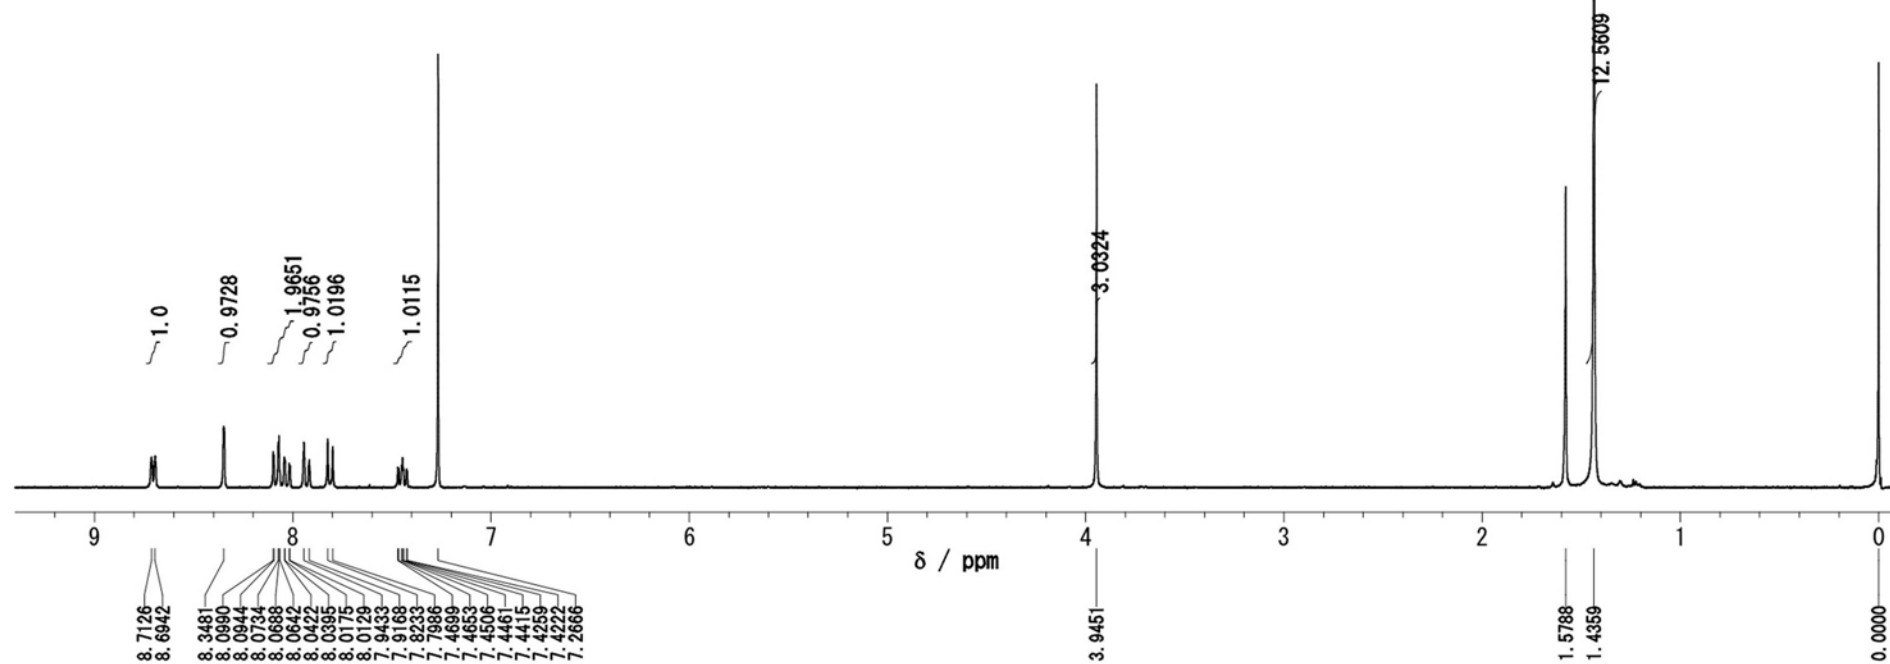

Date Jul 14 11  
 Comment C13 Statdard Observe  
 Stick=none Tune=6.4 Match=0.4  
 ObsNuc <sup>13</sup>C  
 ExMode NQV  
 ObsFreq 75.43 MHz  
 ObsSet -1.0 kHz  
 ObsFine 996.3672 Hz  
 Point 32768  
 Frequency (Span) 18761.73 Hz  
 Scan 5000  
 AcqTime 1.4992 s  
 PD 1.501 s  
 Pulse 6.0  $\mu$ s  
 Temperature 29.0  $^{\circ}$ C  
 Solvent CDCl<sub>3</sub>  
 Reference 77.0 ppm  
 Broad Factor 0.25 Hz  
 RGain 30  
 Printed 2011/Aug/29 01:42:02  
 Operator

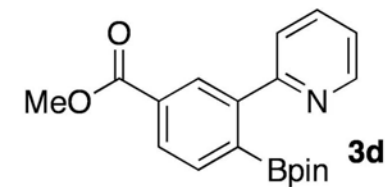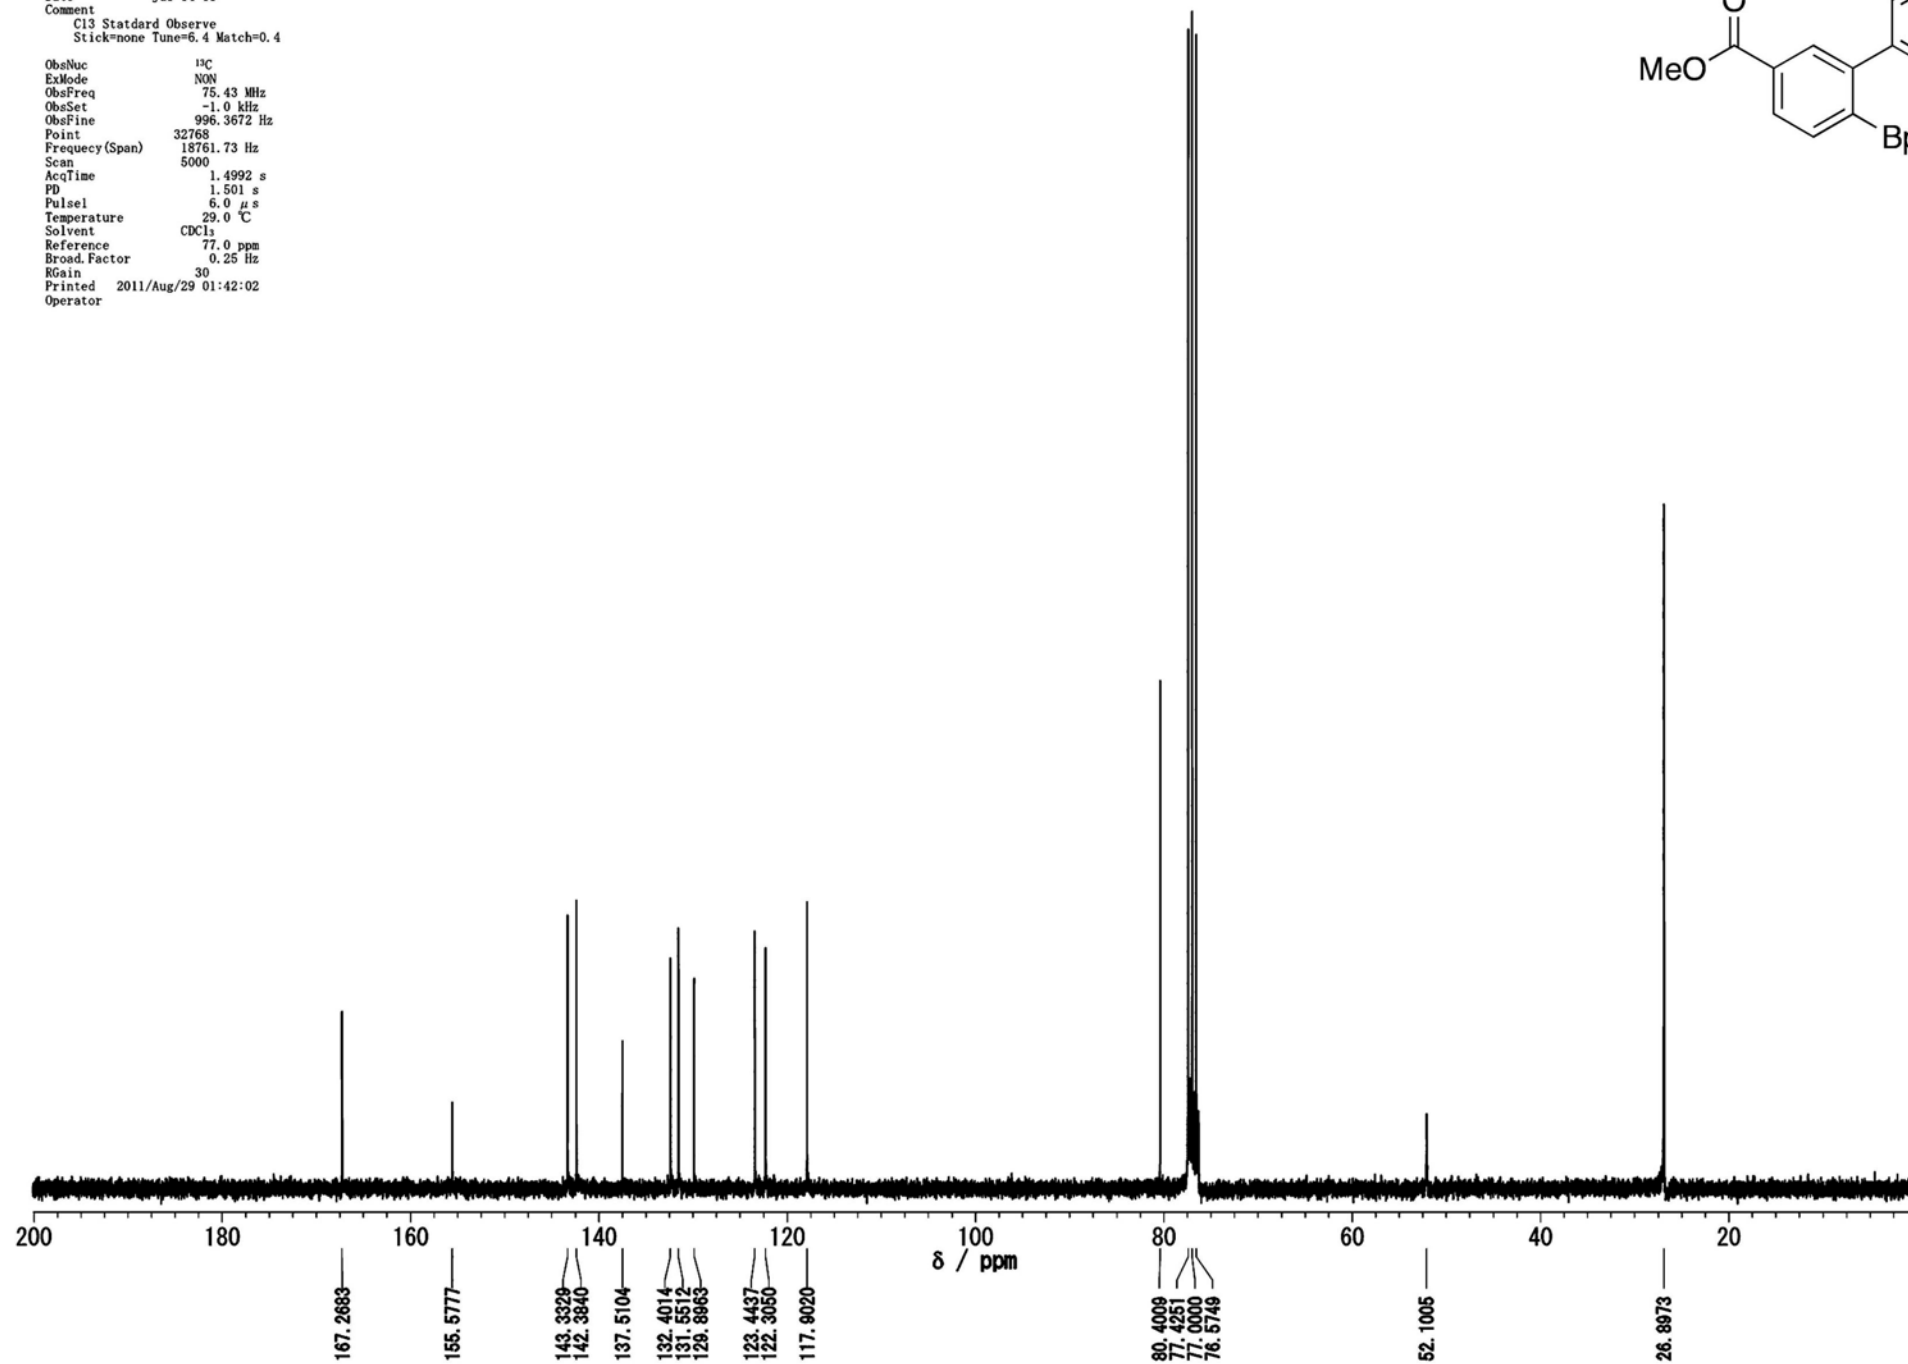

Original File:  
 Date May 30 11  
 Comment  
 STANDARD 1H OBSERVE

ObsNuc <sup>1</sup>H  
 ExMode NON  
 ObsFreq 299.96 MHz  
 ObsSet -1.0 kHz  
 ObsPine 995.0047 Hz  
 Point 16384  
 Frequency (Span) 4500.45 Hz  
 Scan 16  
 AcqTime 3.4983 s  
 PD 1.502 s  
 Pulse 6.0  $\mu$ s  
 Temperature 29.0  $^{\circ}$ C  
 Solvent CDCl<sub>3</sub>  
 Reference 0.0 ppm  
 Broad. Factor 0.1373 Hz  
 RGain 24  
 Printed 2011/Aug/29 01:43:02  
 Operator

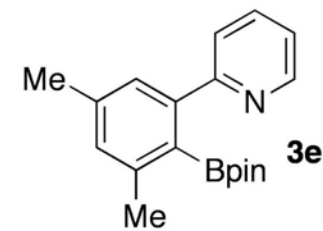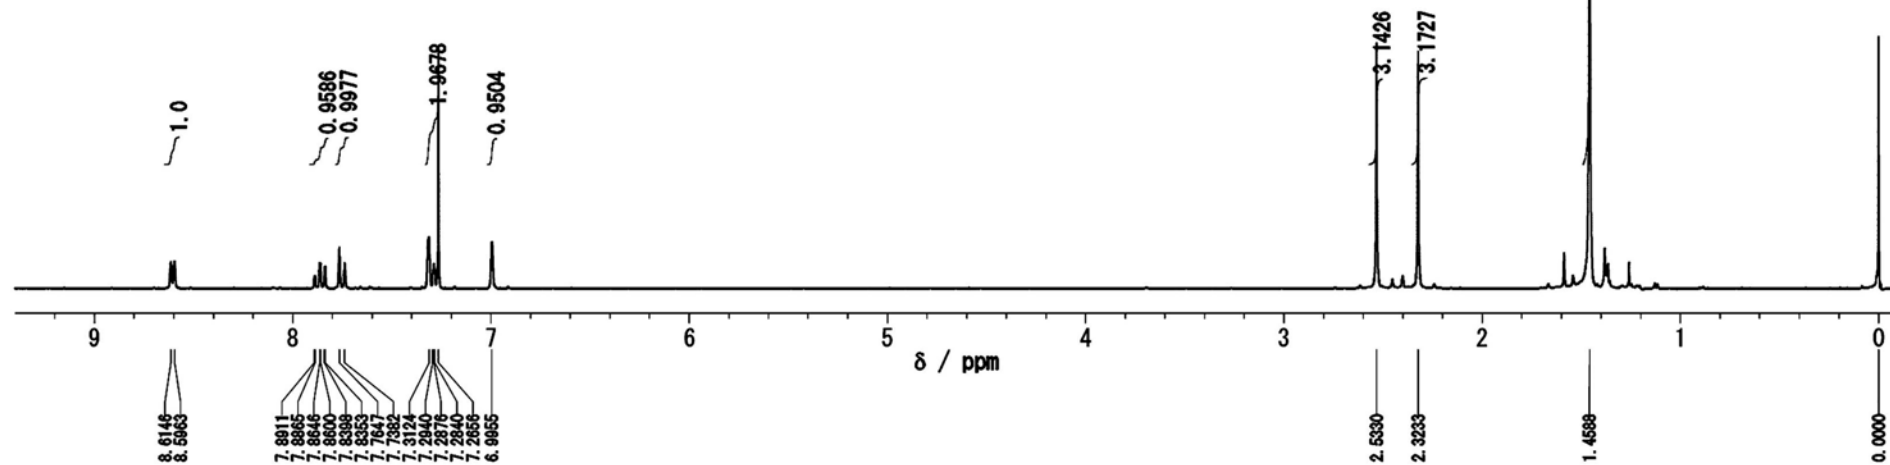

Original File:  
 Date Aug 27 11  
 Comment  
 C13 Statdard Observe  
 Stick=none Tune=6.4 Match=0.4

ObsNuc <sup>13</sup>C  
 ExMode NON  
 ObsFreq 75.43 MHz  
 ObsSet -1.0 kHz  
 ObsFine 996.3672 Hz  
 Point 32768  
 Frequency (Span) 18761.73 Hz  
 Scan 128  
 AcqTime 1.4992 s  
 PD 1.501 s  
 Pulse 6.0  $\mu$ s  
 Temperature 29.0  $^{\circ}$ C  
 Solvent CDCl<sub>3</sub>  
 Reference 77.0 ppm  
 Broad Factor 0.2863 Hz  
 RGain 30  
 Printed 2011/Aug/29 01:44:25  
 Operator

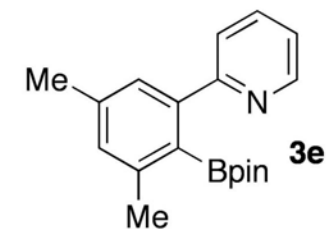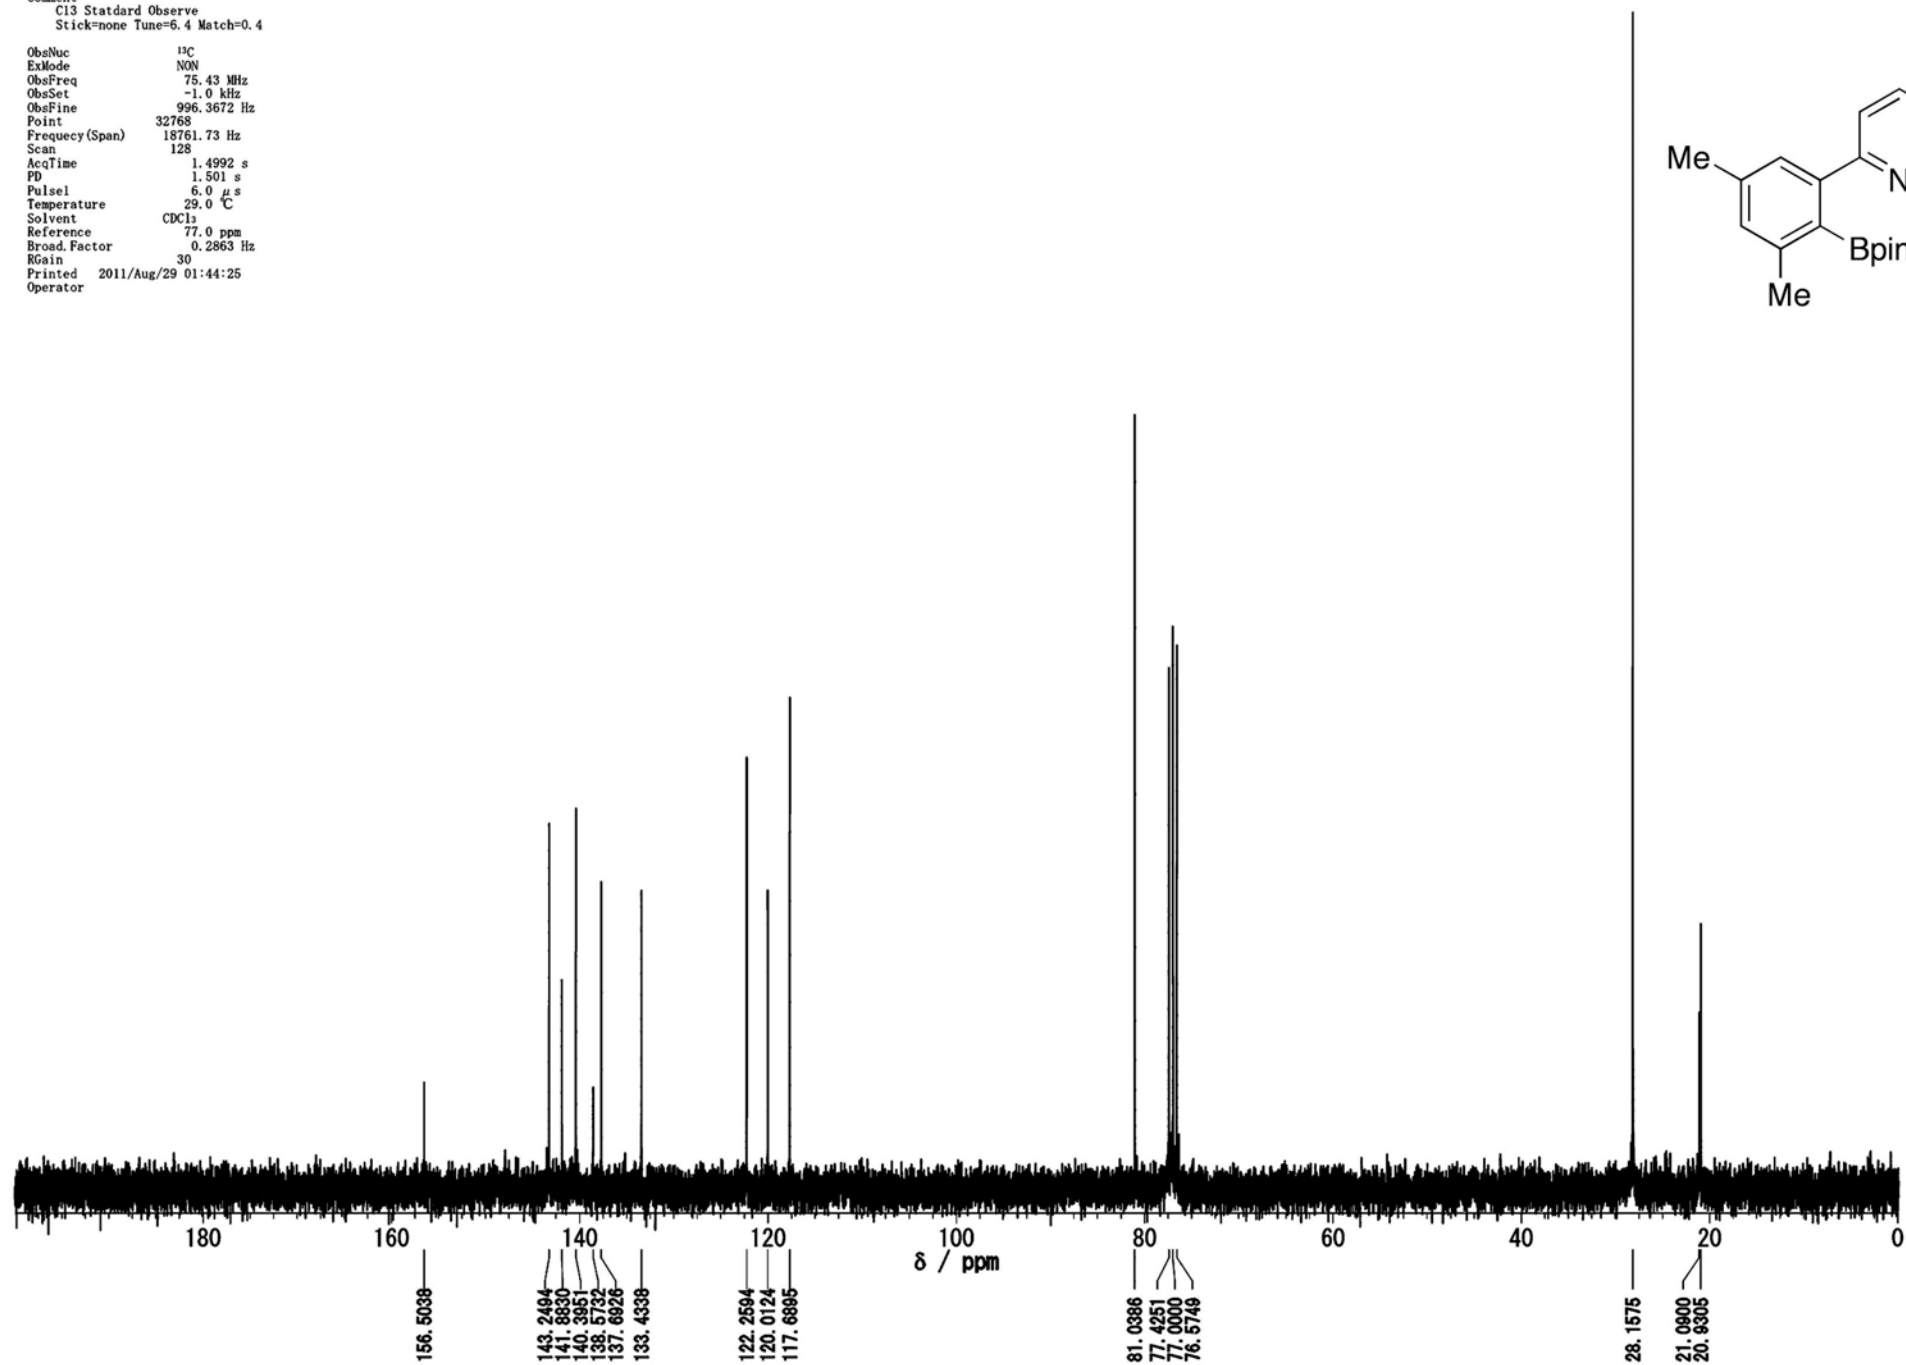



Original File:  
Date Jun 16 11  
Comment  
STANDARD 1H OBSERVE

ObsNuc <sup>1</sup>H  
ExMode NON  
ObsFreq 299.96 MHz  
ObsSet -1.0 kHz  
ObsPine 995.0047 Hz  
Point 16384  
Frequency (Span) 4500.45 Hz  
Scan 16  
AcqTime 3.4983 s  
PD 1.502 s  
Pulse 6.0  $\mu$ s  
Temperature 29.0  $^{\circ}$ C  
Solvent CDCl<sub>3</sub>  
Reference 0.0 ppm  
Broad Factor 0.1373 Hz  
RGain 20  
Printed 2011/Sep/03 22:24:50  
Operator

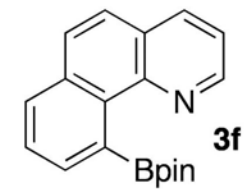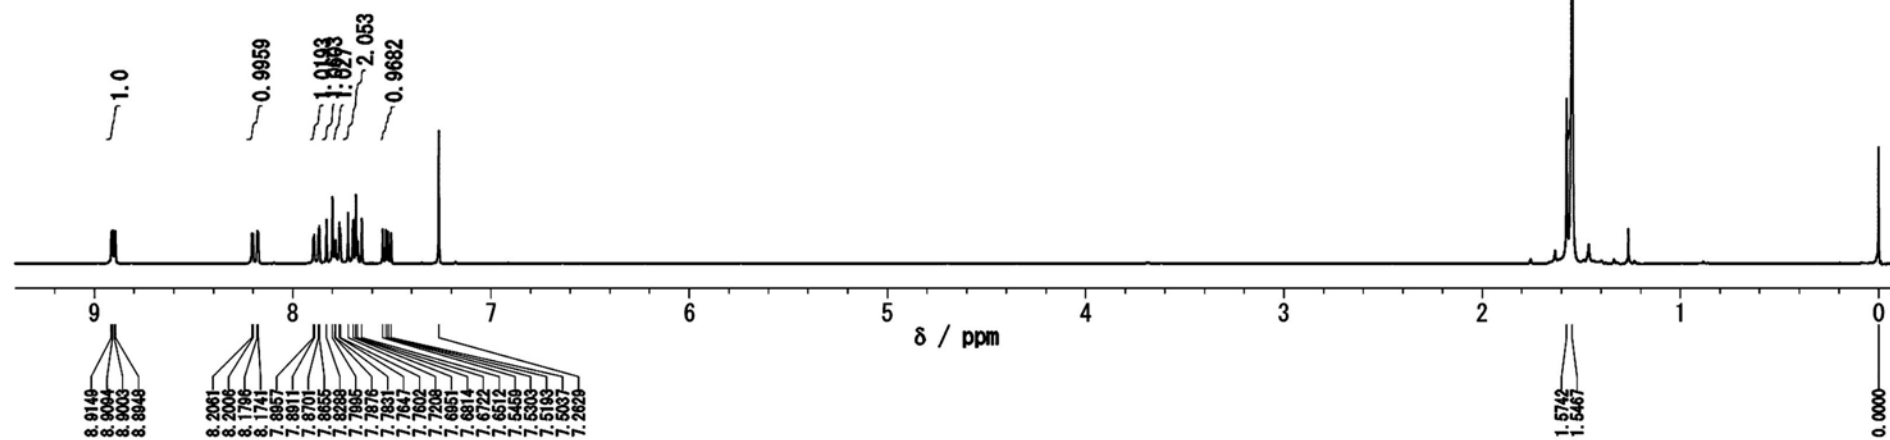

Original File:  
 Date Jun 16 11  
 Comment  
 C13 Statdard Observe  
 Stick=none Tune=6.4 Match=0.4

ObsNuc  $^{13}\text{C}$   
 ExMode NON  
 ObsFreq 75.43 MHz  
 ObsSet -1.0 kHz  
 ObsFine 996.3672 Hz  
 Point 32768  
 Frequency (Span) 18761.73 Hz  
 Scan 64  
 AcqTime 1.4992 s  
 PD 1.501 s  
 Pulse 6.0  $\mu\text{s}$   
 Temperature 29.0  $^{\circ}\text{C}$   
 Solvent  $\text{CDCl}_3$   
 Reference 77.0 ppm  
 Broad.Factor 0.2863 Hz  
 RGain 30  
 Printed 2011/Sep/03 22:25:54  
 Operator

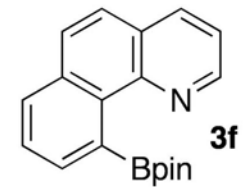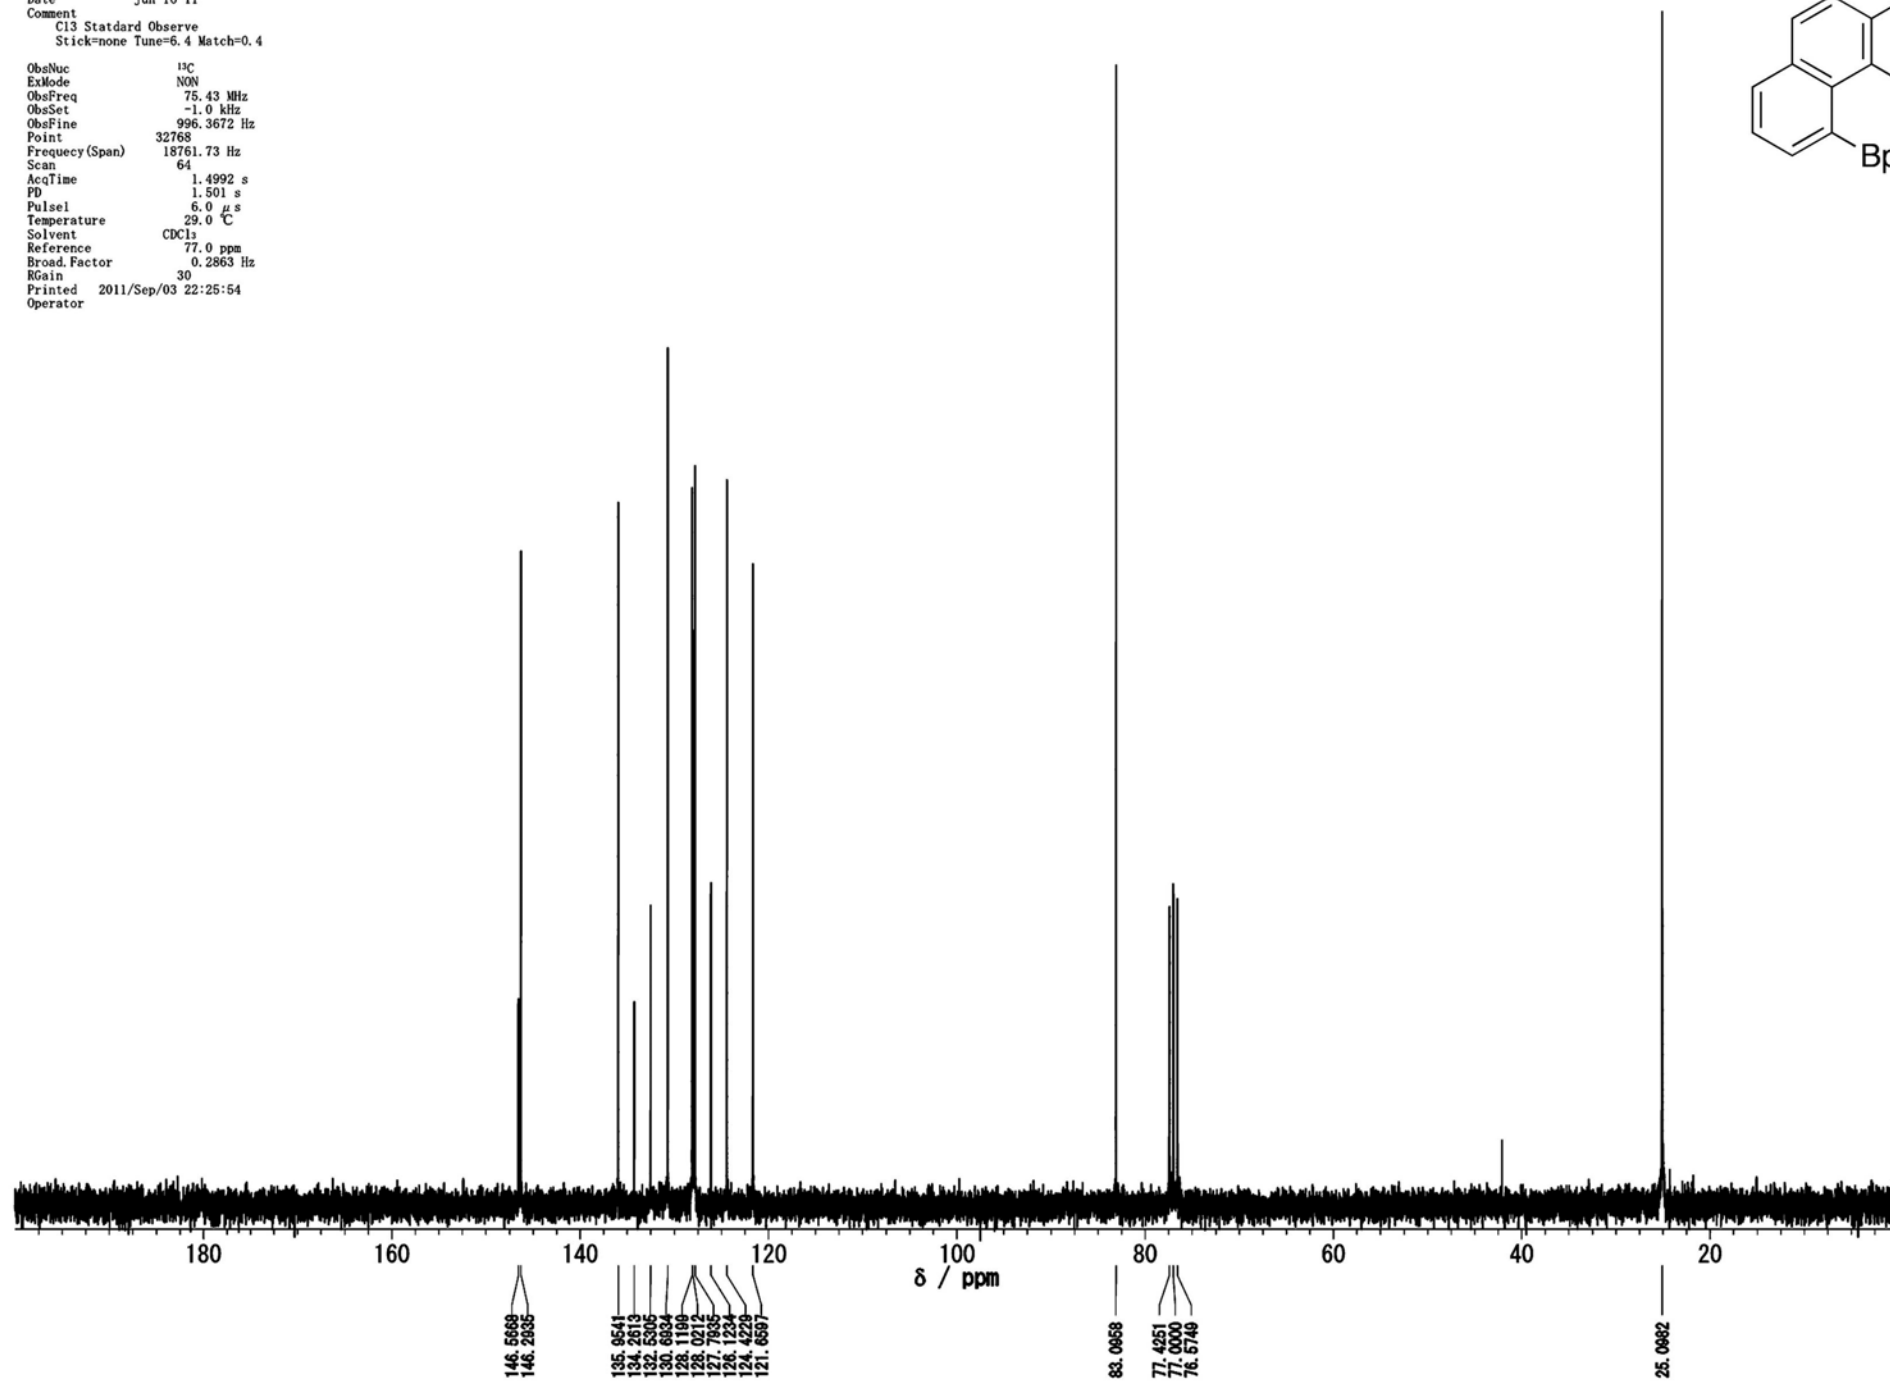

Original File:  
 Date Jun 19 11  
 Comment  
 STANDARD 1H OBSERVE

|                  |                      |
|------------------|----------------------|
| ObsNuc           | <sup>1</sup> H       |
| ExMode           | NON                  |
| ObsFreq          | 299.96 MHz           |
| ObsSet           | -1.0 kHz             |
| ObsPine          | 995.0047 Hz          |
| Point            | 16384                |
| Frequency (Span) | 4500.45 Hz           |
| Scan             | 16                   |
| AcqTime          | 3.4983 s             |
| PD               | 1.502 s              |
| Pulse1           | 6.0 $\mu$ s          |
| Temperature      | 29.0 $^{\circ}$ C    |
| Solvent          | CDCl <sub>3</sub>    |
| Reference        | 0.0 ppm              |
| Broad. Factor    | 0.1373 Hz            |
| RGain            | 30                   |
| Printed          | 2011/Sep/03 22:27:09 |
| Operator         |                      |

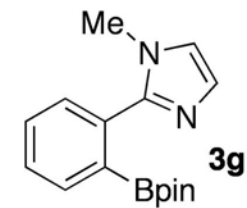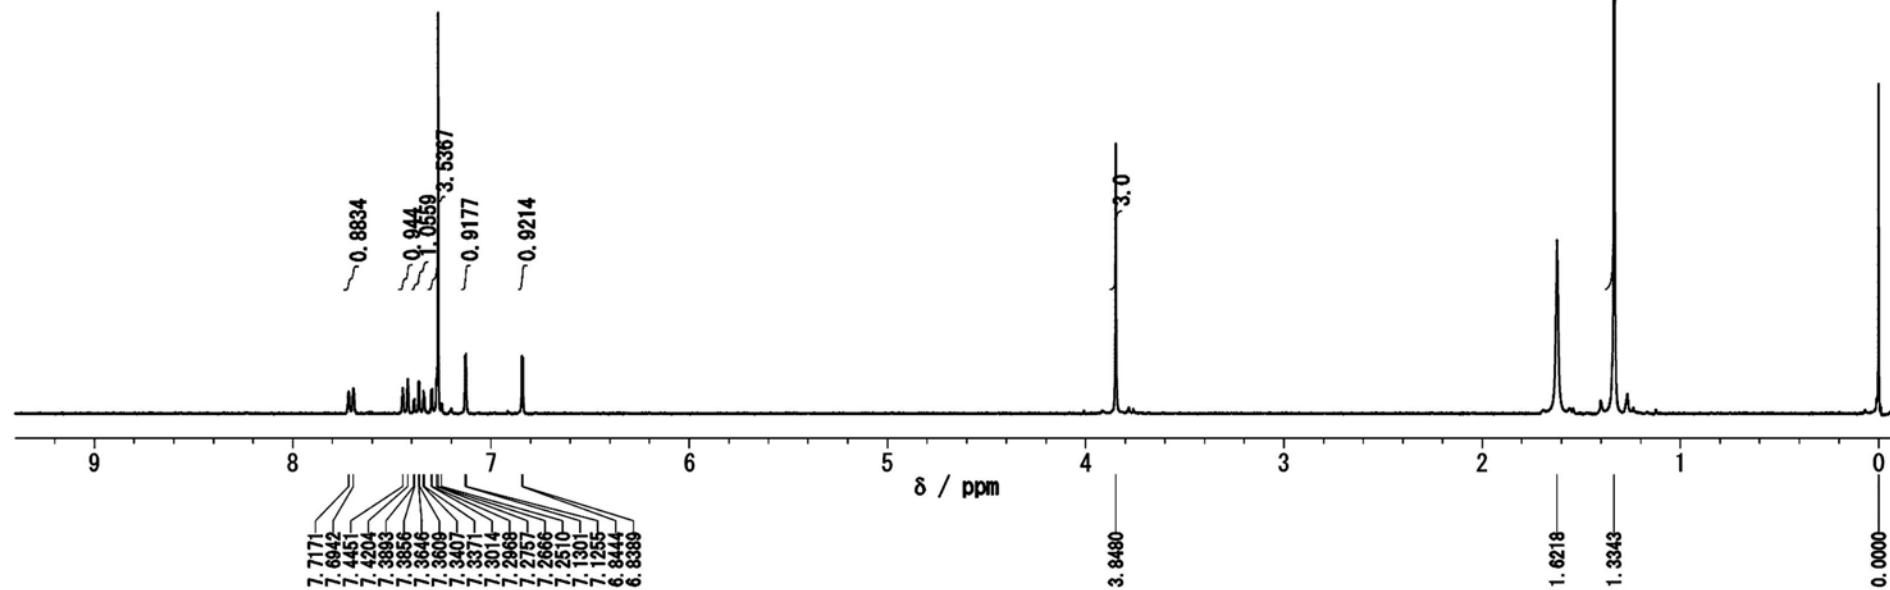

Original File:  
 Date Jun 20 11  
 Comment  
 C13 Statdard Observe  
 Stick=none Tune=6.4 Match=0.4

ObsNuc <sup>13</sup>C  
 ExMode NON  
 ObsFreq 75.43 MHz  
 ObsSet -1.0 kHz  
 ObsFine 996.3672 Hz  
 Point 32768  
 Frequency (Span) 18761.73 Hz  
 Scan 320  
 AcqTime 1.4992 s  
 PD 1.501 s  
 Pulsel 6.0  $\mu$ s  
 Temperature 29.0  $^{\circ}$ C  
 Solvent CDCl<sub>3</sub>  
 Reference 77.0 ppm  
 Broad.Factor 0.2863 Hz  
 RGain 30  
 Printed 2011/Sep/03 22:31:08  
 Operator

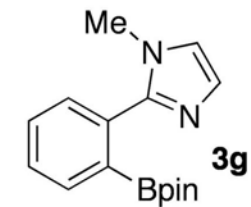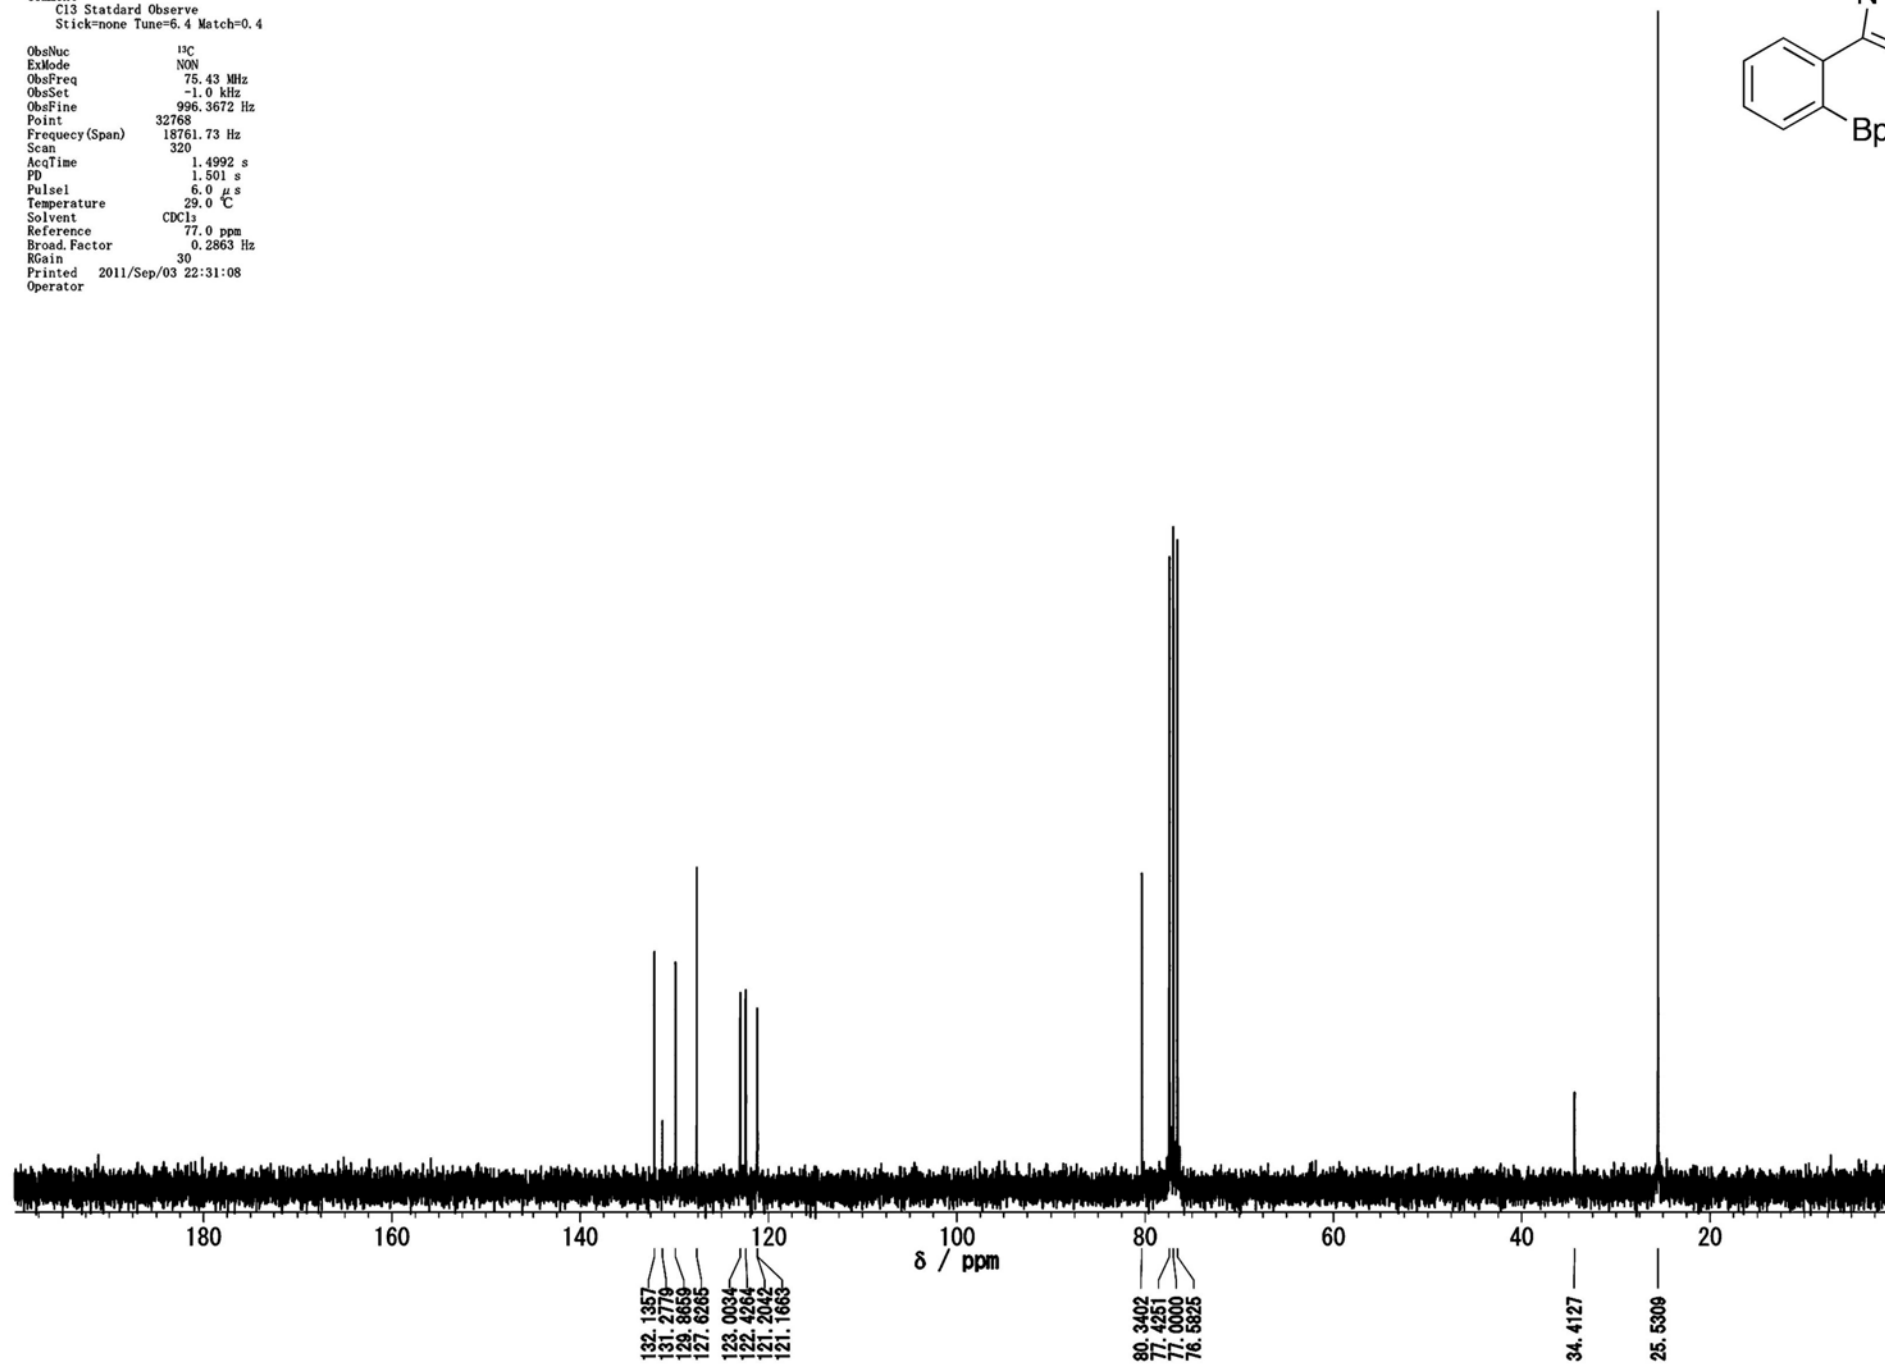

Original File:  
 Date Aug 1 11  
 Comment  
 STANDARD 1H OBSERVE

ObsNuc <sup>1</sup>H  
 ExMode NON  
 ObsFreq 299.96 MHz  
 ObsSet -1.0 kHz  
 ObsPine 995.0047 Hz  
 Point 16384  
 Frequency (Span) 4500.45 Hz  
 Scan 16  
 AcqTime 3.4983 s  
 PD 1.502 s  
 Pulse 6.0  $\mu$ s  
 Temperature 29.0  $^{\circ}$ C  
 Solvent CDCl<sub>3</sub>  
 Reference 0.0 ppm  
 Broad. Factor 0.1373 Hz  
 RGain 30  
 Printed 2011/Sep/03 22:32:05  
 Operator

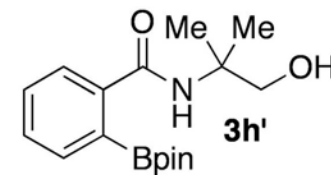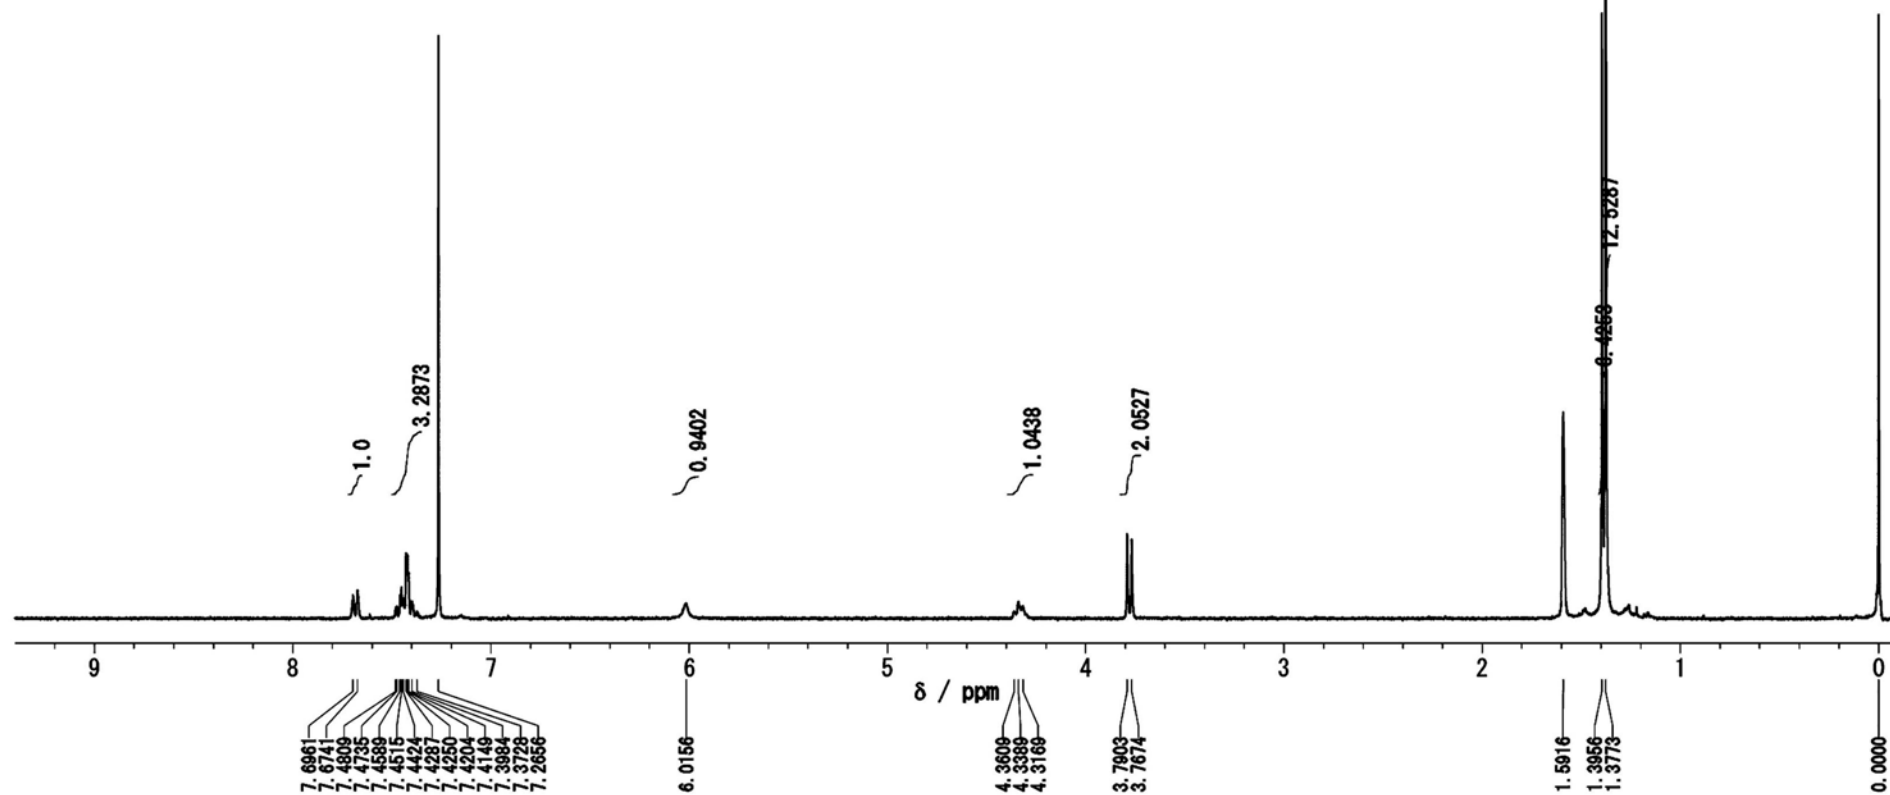

Original File:  
 Date Aug 2 11  
 Comment  
 C13 Statdard Observe  
 Stick=none Tune=6.4 Match=0.4

ObsNuc <sup>13</sup>C  
 ExMode NON  
 ObsFreq 75.43 MHz  
 ObsSet -1.0 kHz  
 ObsFine 996.3672 Hz  
 Point 32768  
 Frequency (Span) 18761.73 Hz  
 Scan 8000  
 AcqTime 1.4992 s  
 PD 1.501 s  
 Pulsel 6.0  $\mu$ s  
 Temperature 29.0  $^{\circ}$ C  
 Solvent CDCl<sub>3</sub>  
 Reference 77.0 ppm  
 Broad.Factor 0.2863 Hz  
 RGain 30  
 Printed 2011/Sep/03 22:33:16  
 Operator

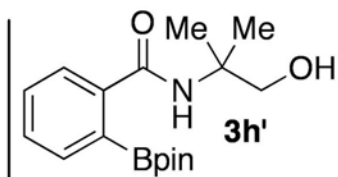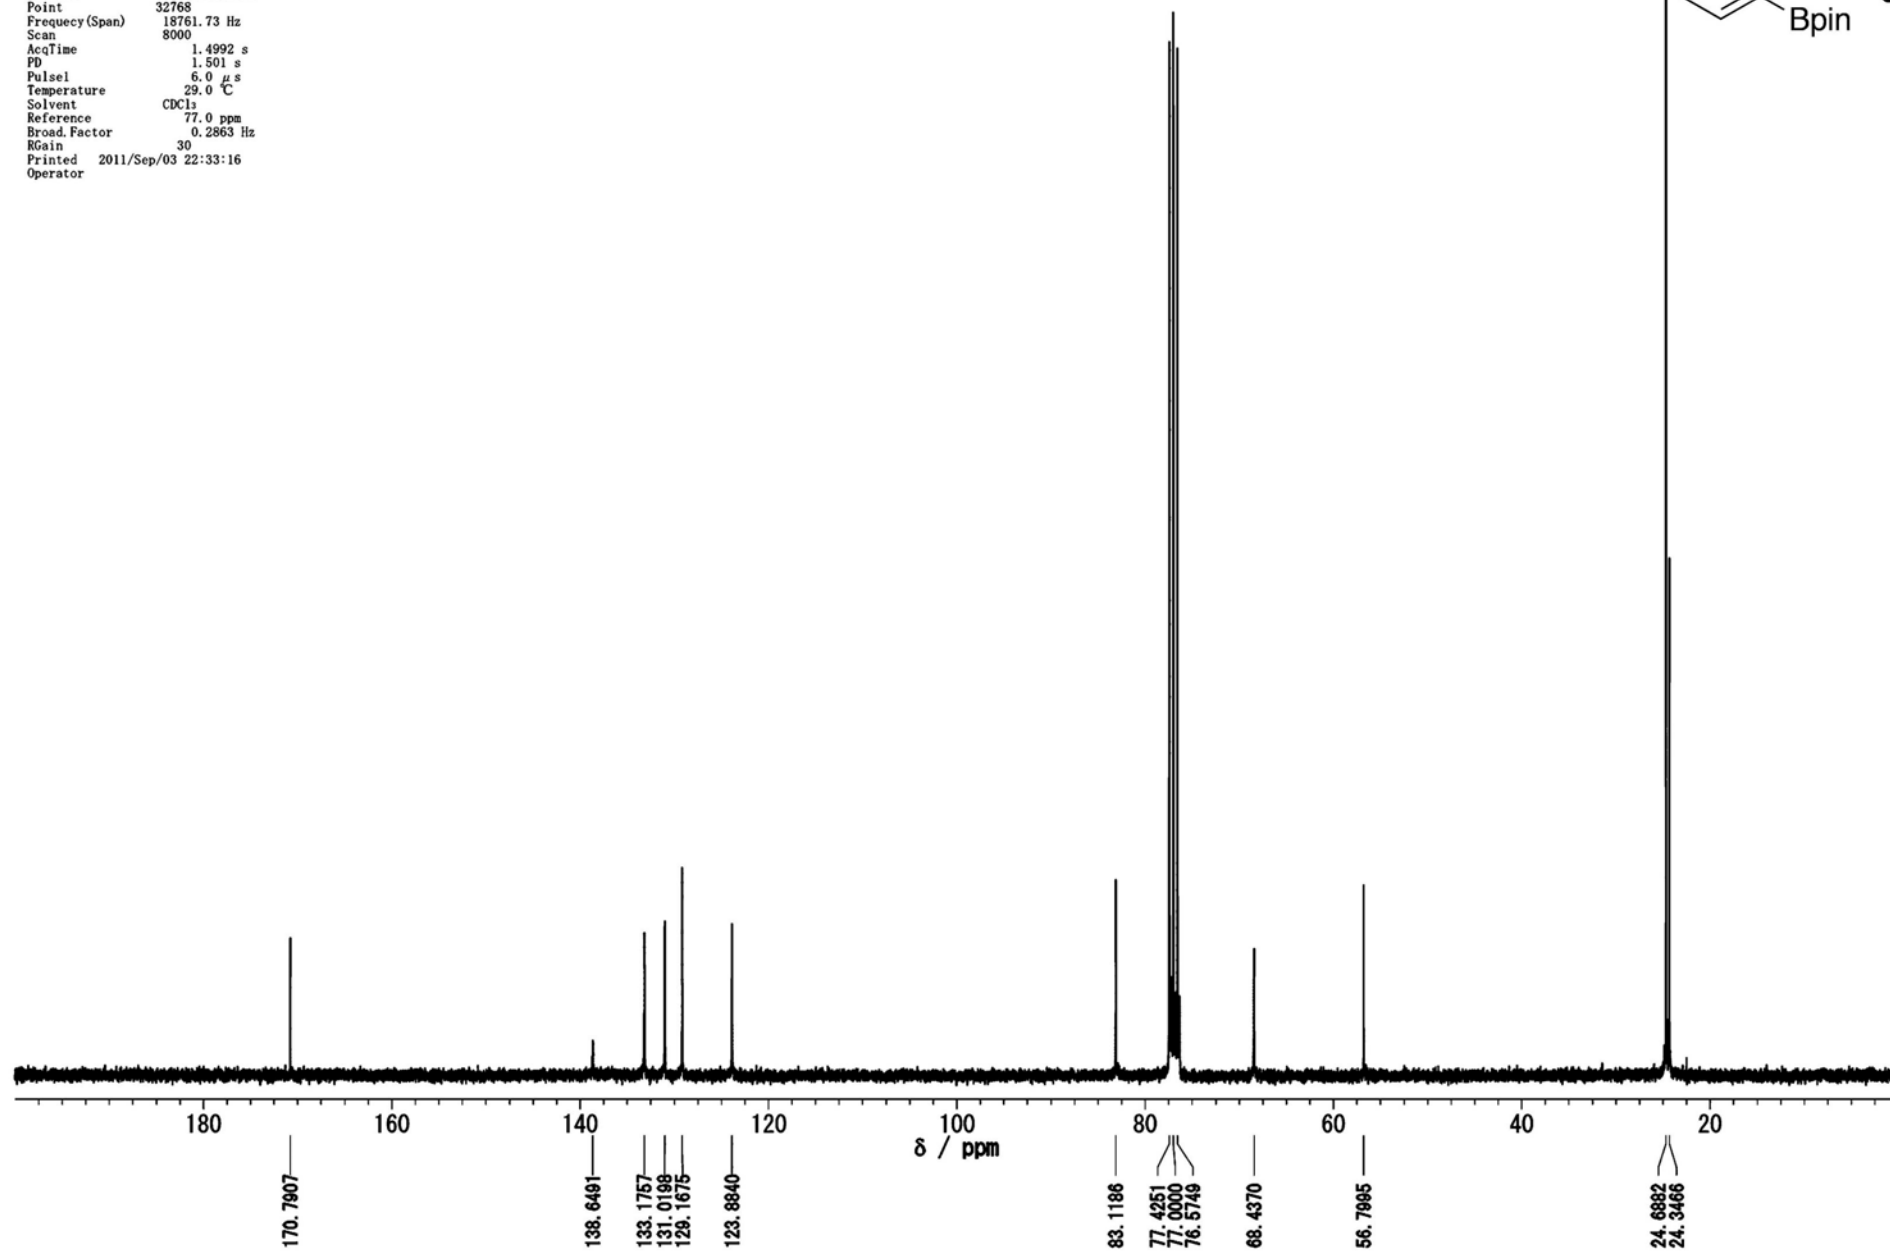

Original File: Jun 15 11  
 Date: Jun 15 11  
 Comment: STANDARD 1H OBSERVE  
 ObsNuc: <sup>1</sup>H  
 ExMode: NON  
 ObsFreq: 299.96 MHz  
 ObsSet: -1.0 kHz  
 ObsPine: 995.0047 Hz  
 Point: 16384  
 Frequency (Span): 4500.45 Hz  
 Scan: 16  
 AcqTime: 3.4983 s  
 PD: 1.502 s  
 Pulse: 6.0  $\mu$ s  
 Temperature: 29.0  $^{\circ}$ C  
 Solvent: CDCl<sub>3</sub>  
 Reference: 0.0 ppm  
 Broad Factor: 0.1373 Hz  
 RGain: 26  
 Printed: 2011/Sep/03 22:34:45  
 Operator:

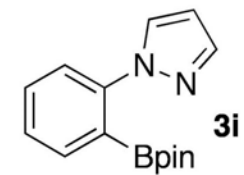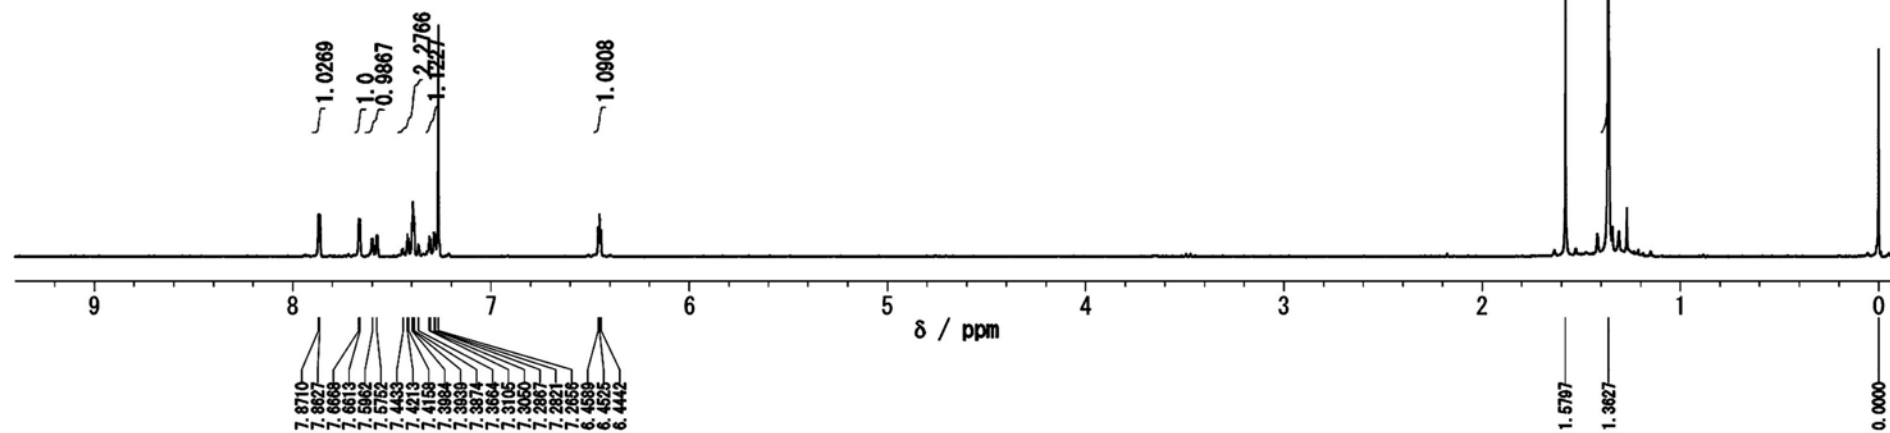

Original File: Jun 15 11  
 Date Jun 15 11  
 Comment C13 Statdard Observe  
 Stick=none Tune=6.4 Match=0.4

ObsNuc  $^{13}\text{C}$   
 ExMode NON  
 ObsFreq 75.43 MHz  
 ObsSet -1.0 kHz  
 ObsFine 996.3672 Hz  
 Point 32768  
 Frequency (Span) 18761.73 Hz  
 Scan 128  
 AcqTime 1.4992 s  
 PD 1.501 s  
 Pulse 6.0  $\mu\text{s}$   
 Temperature 29.0  $^{\circ}\text{C}$   
 Solvent  $\text{CDCl}_3$   
 Reference 77.0 ppm  
 Broad Factor 0.2863 Hz  
 RGain 30  
 Printed 2011/Sep/03 22:35:57  
 Operator

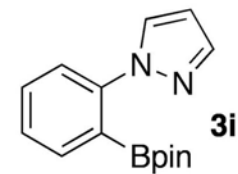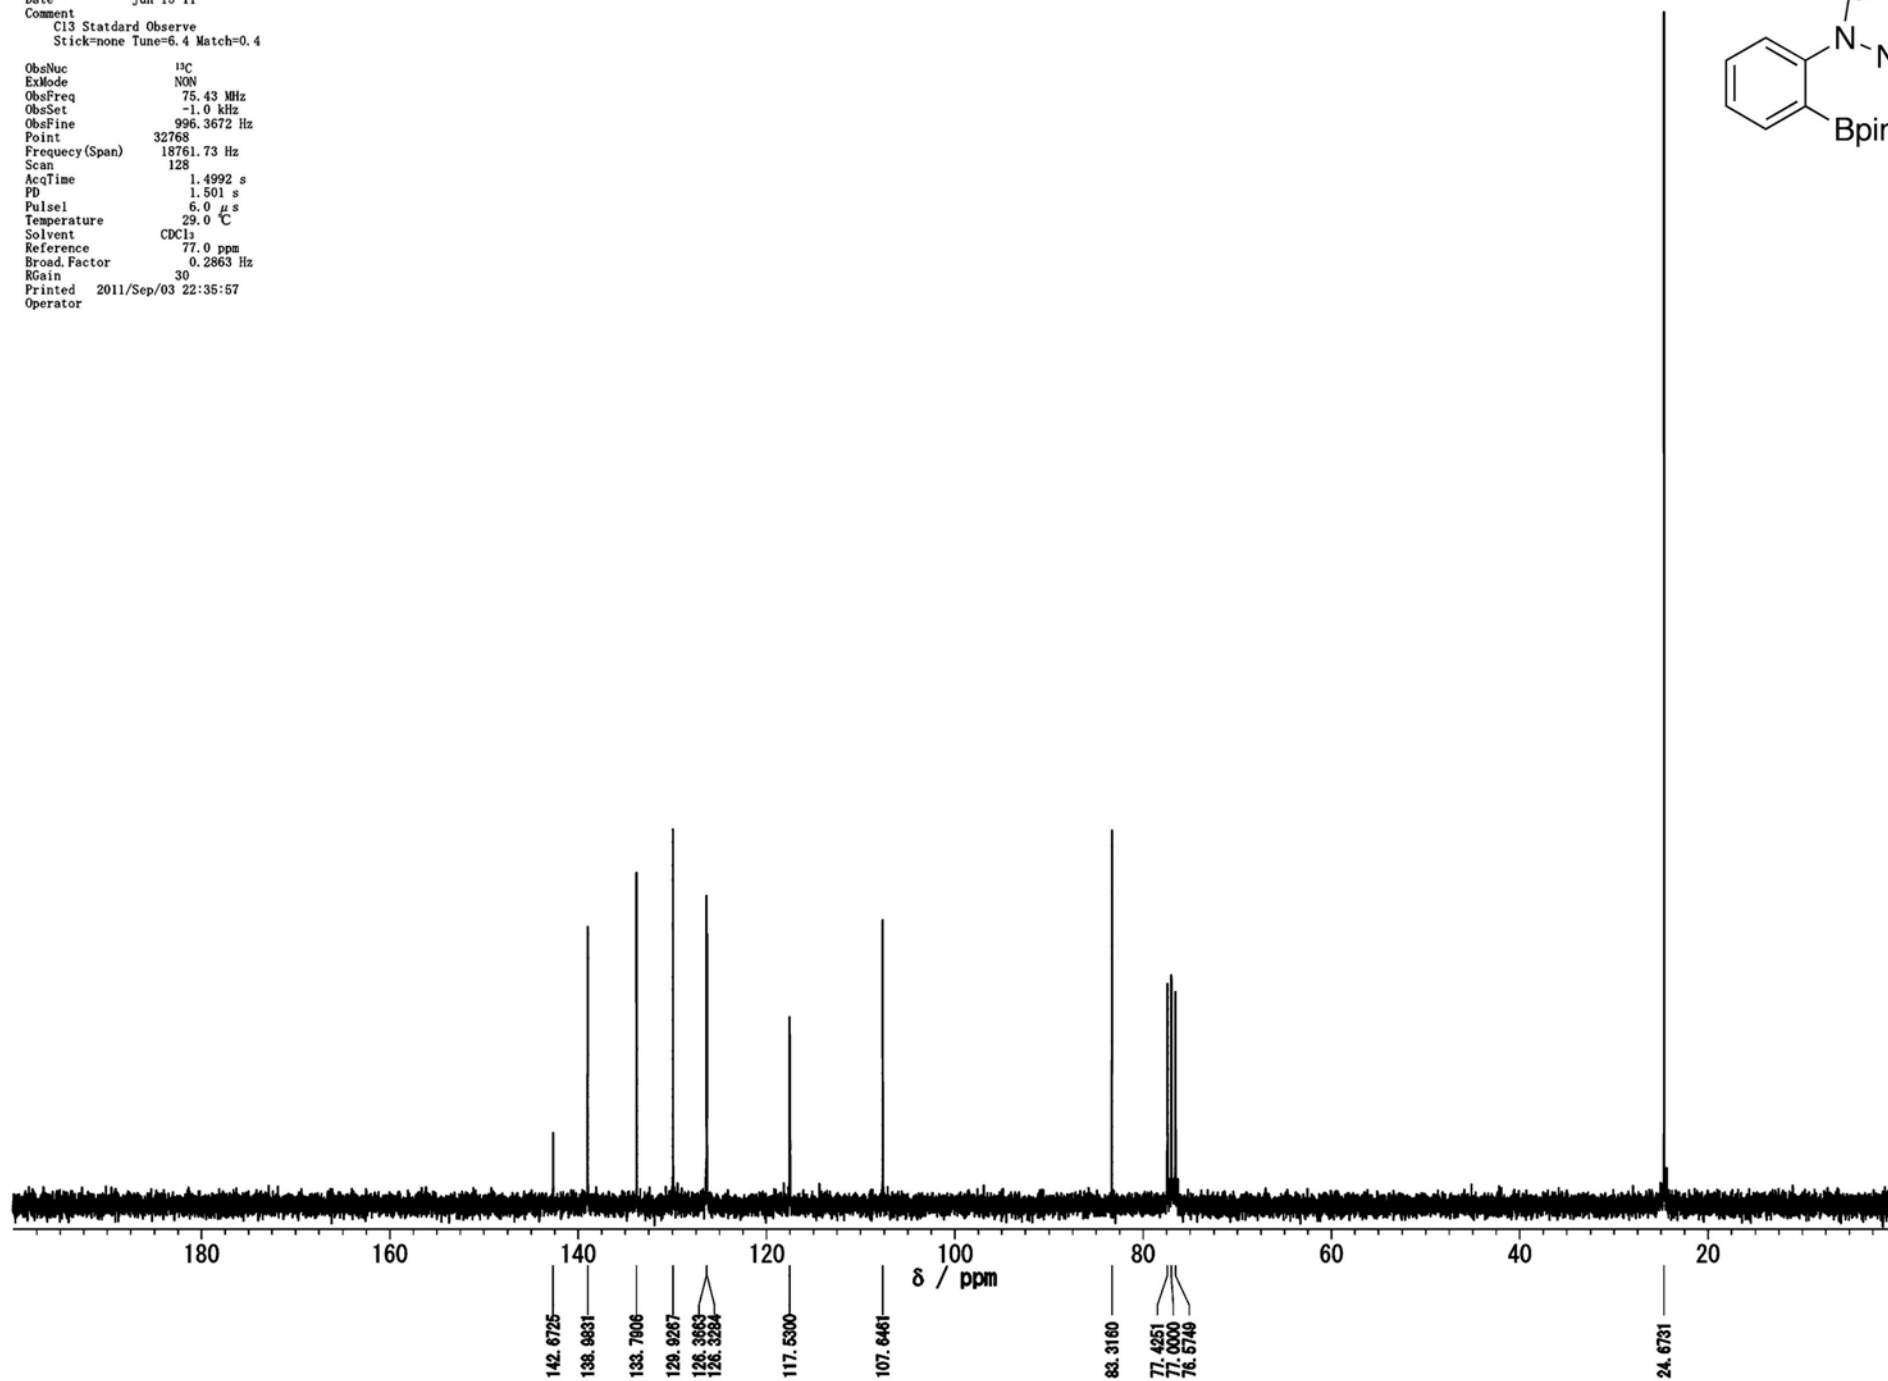



Original File:   
 Date Jul 26 11   
 Comment   
 STANDARD 1H OBSERVE   
 ObsNuc <sup>1</sup>H   
 ExMode NON   
 ObsFreq 299.96 MHz   
 ObsSet -1.0 kHz   
 ObsPine 995.0047 Hz   
 Point 16384   
 Frequency (Span) 4500.45 Hz   
 Scan 16   
 AcqTime 3.4983 s   
 PD 1.502 s   
 Pulse 6.0 μs   
 Temperature 29.0 °C   
 Solvent CDCl<sub>3</sub>   
 Reference 0.0 ppm   
 Broad Factor 0.1373 Hz   
 RGain 24   
 Printed 2011/Sep/03 22:37:14   
 Operator

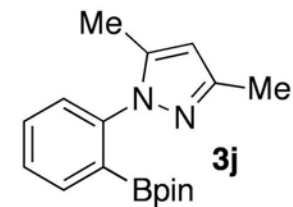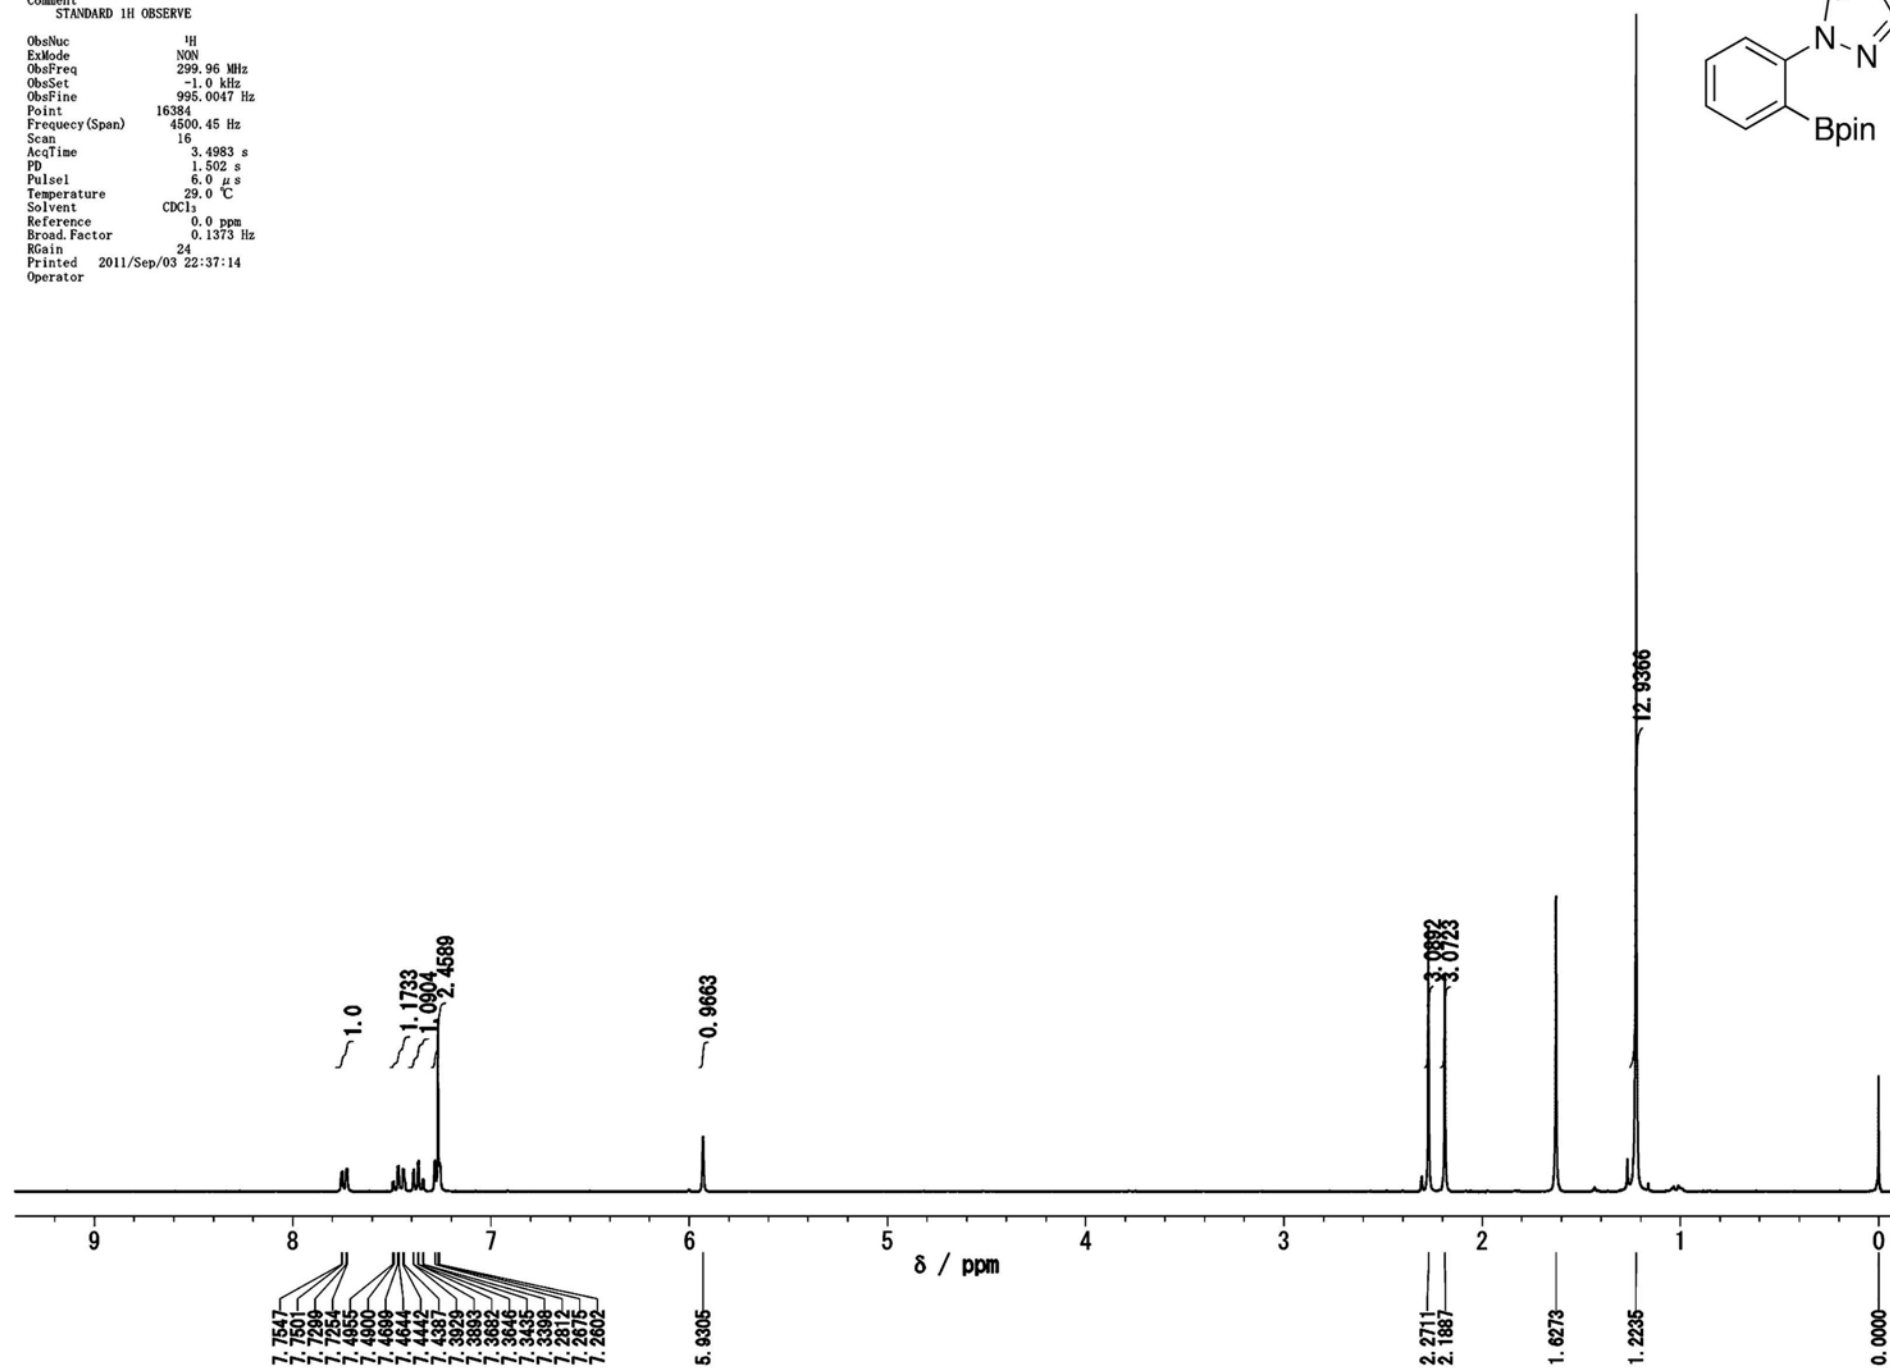

Original File: Jul 26 11  
 Date  
 Comment  
 C13 Statdard Observe  
 Stick=none Tune=6.4 Match=0.4

ObsNuc <sup>13</sup>C  
 ExMode NON  
 ObsFreq 75.43 MHz  
 ObsSet -1.0 kHz  
 ObsFine 996.3672 Hz  
 Point 32768  
 Frequency (Span) 18761.73 Hz  
 Scan 32  
 AcqTime 1.4992 s  
 PD 1.501 s  
 Pulsel 6.0  $\mu$ s  
 Temperature 29.0  $^{\circ}$ C  
 Solvent CDCl<sub>3</sub>  
 Reference 77.0 ppm  
 Broad.Factor 0.2863 Hz  
 RGain 30  
 Printed 2011/Sep/03 22:38:16  
 Operator

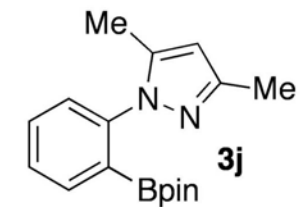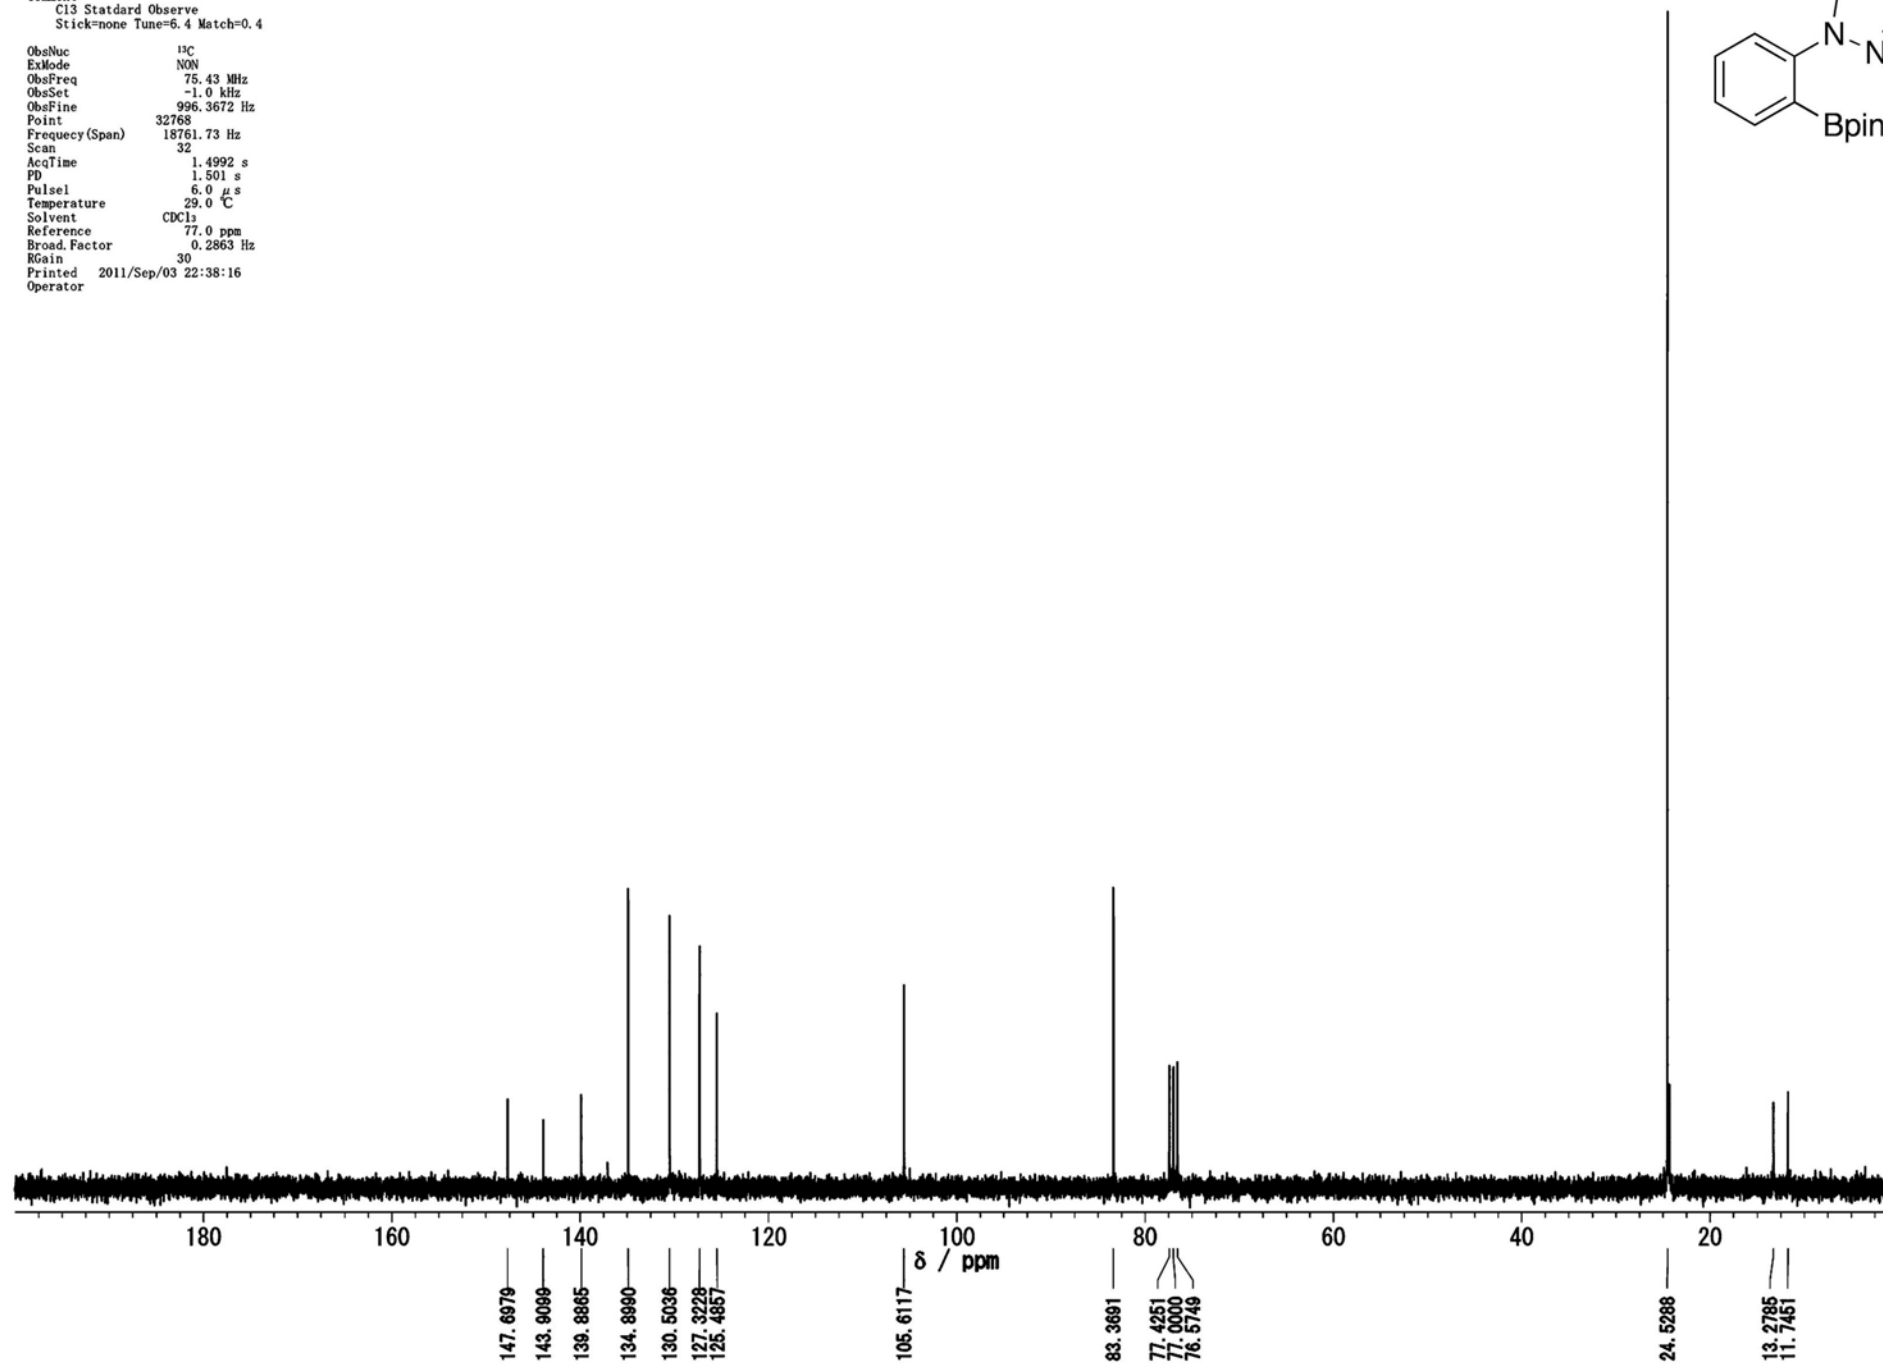

Original File:  
 Date May 19 11  
 Comment  
 STANDARD 1H OBSERVE

ObsNuc H  
 ExMode NON  
 ObsFreq 299.96 MHz  
 ObsSet -1.0 kHz  
 ObsPine 995.0047 Hz  
 Point 16384  
 Frequency (Span) 4500.45 Hz  
 Scan 16  
 AcqTime 3.4983 s  
 PD 1.502 s  
 Pulse 6.0  $\mu$ s  
 Temperature 29.0  $^{\circ}$ C  
 Solvent CDCl<sub>3</sub>  
 Reference 0.0 ppm  
 Broad Factor 0.1373 Hz  
 RGain 26  
 Printed 2011/Sep/03 22:40:05  
 Operator

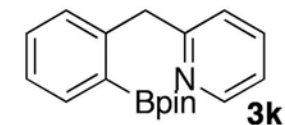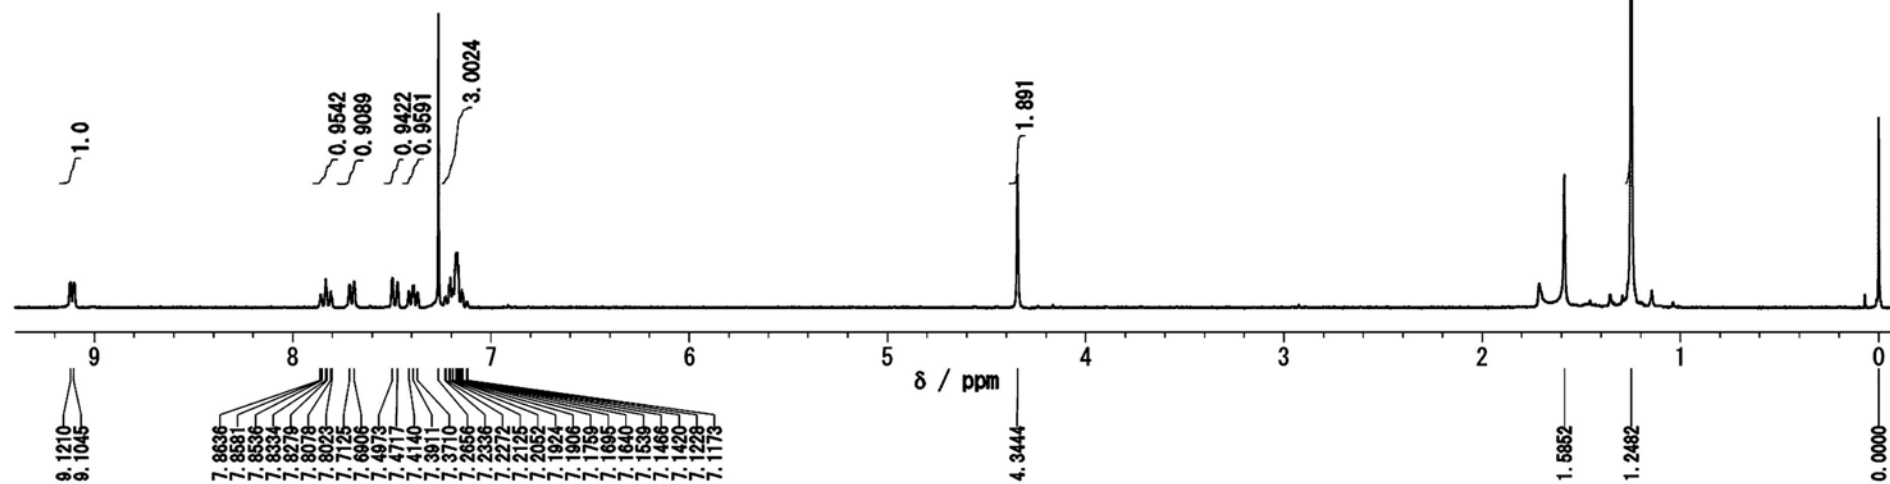

Original File:  
 Date May 19 11  
 Comment  
 C13 Statdard Observe  
 Stick=none Tune=6.4 Match=0.4

ObsNuc <sup>13</sup>C  
 ExMode NON  
 ObsFreq 75.43 MHz  
 ObsSet -1.0 kHz  
 ObsFine 996.3672 Hz  
 Point 32768  
 Frequency (Span) 18761.73 Hz  
 Scan 2048  
 AcqTime 1.4992 s  
 PD 1.501 s  
 Pulsel 6.0 μs  
 Temperature 29.0 °C  
 Solvent CDCl<sub>3</sub>  
 Reference 77.0 ppm  
 Broad Factor 0.2863 Hz  
 RGain 30  
 Printed 2011/Sep/03 22:41:07  
 Operator

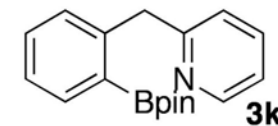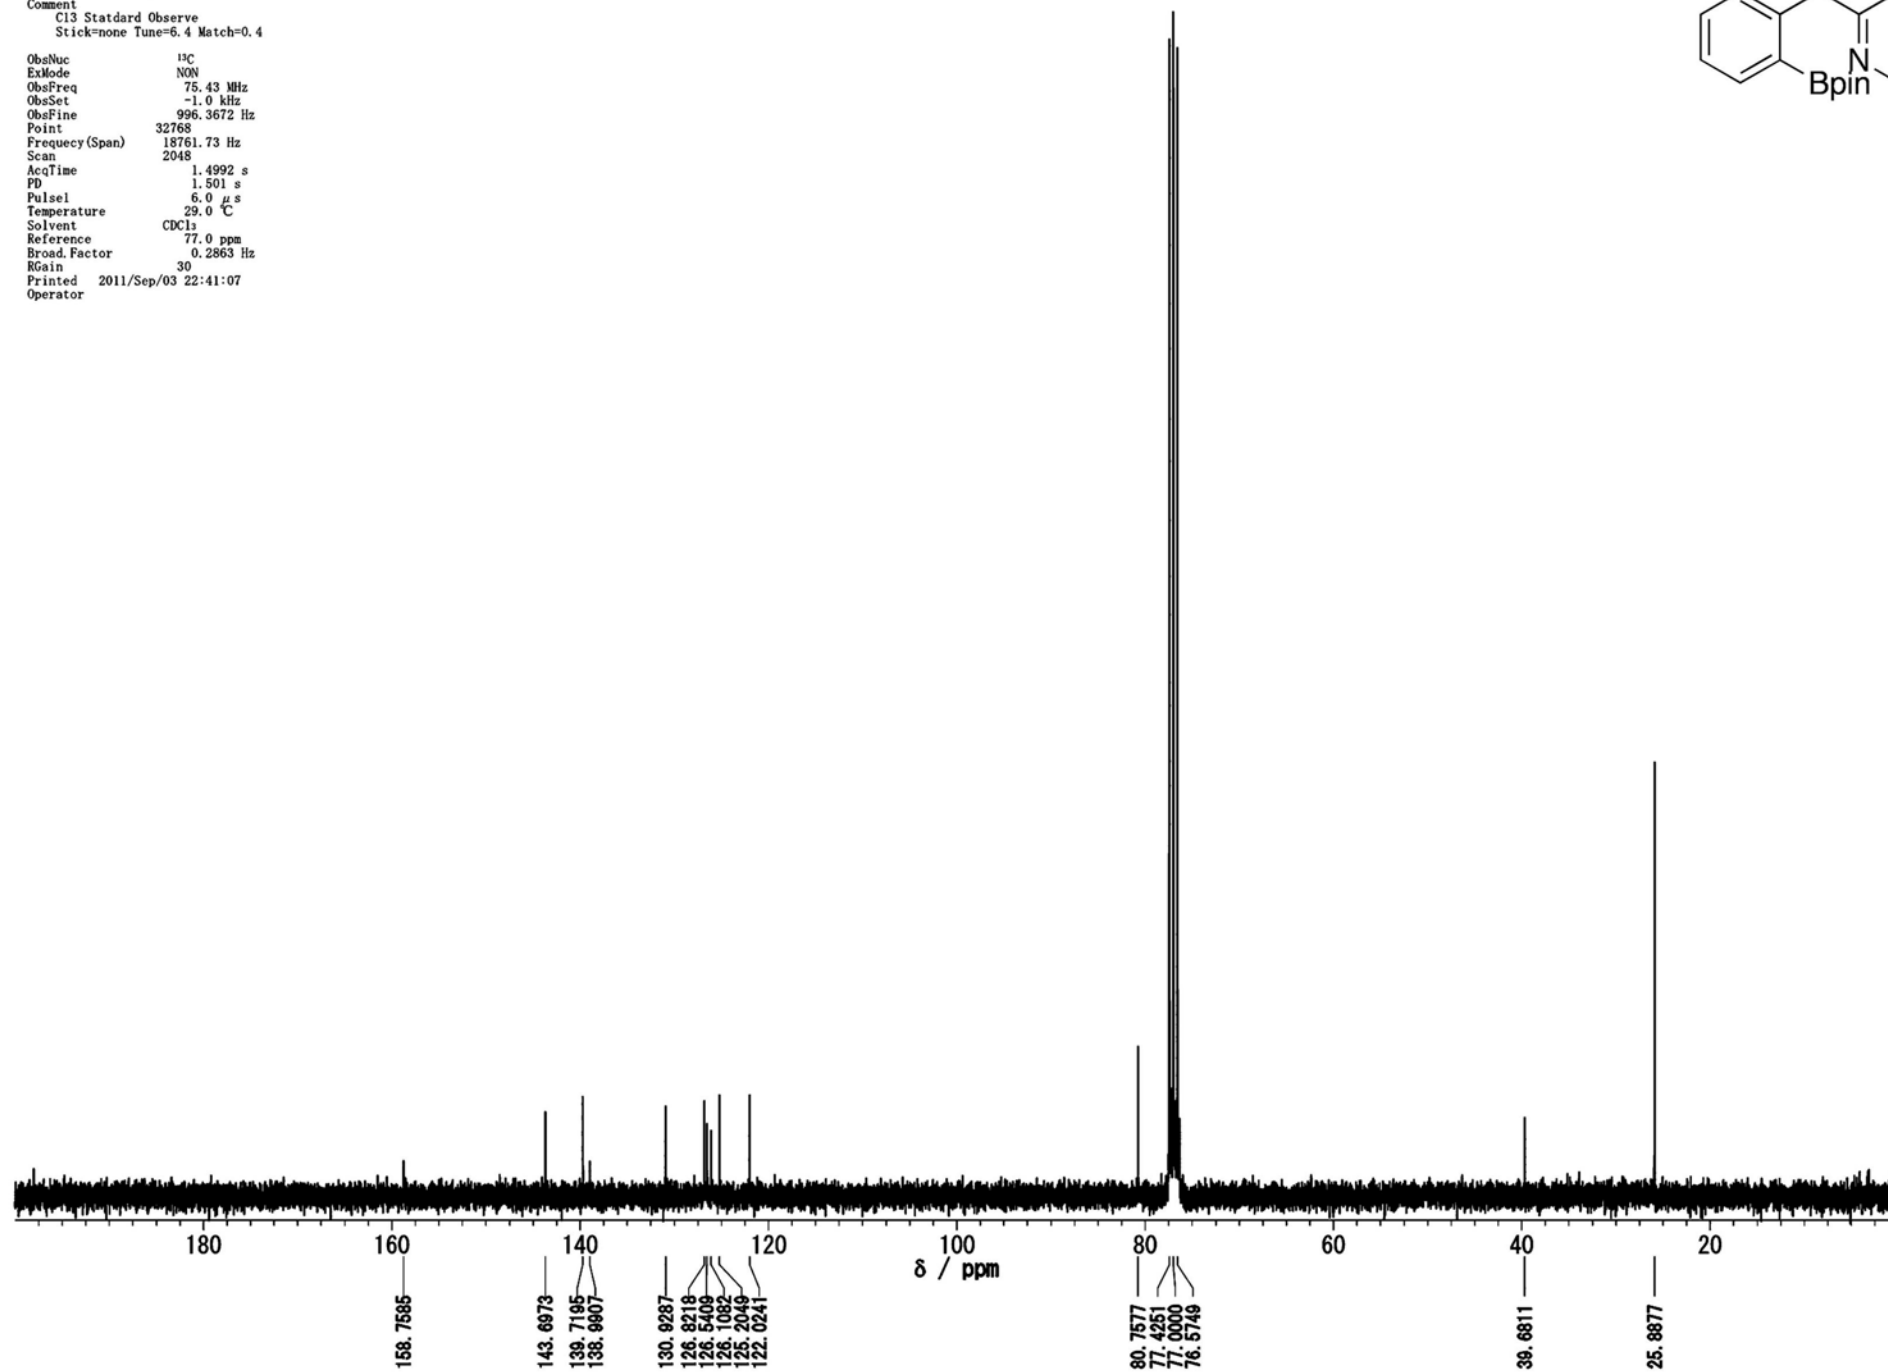

Original File:  
Date Aug 30 11  
Comment  
STANDARD 1H OBSERVE

ObsNuc H  
ExMode NOV  
ObsFreq 299.96 MHz  
ObsSet -1.0 kHz  
ObsFine 995.0047 Hz  
Point 16384  
Frequency(Span) 4500.45 Hz  
Scan 16  
AcqTime 3.4983 s  
PD 1.502 s  
Pulse 6.0  $\mu$ s  
Temperature 29.0  $^{\circ}$ C  
Solvent CDCl<sub>3</sub>  
Reference 0.0 ppm  
Broad.Factor 0.1373 Hz  
RGain 30  
Printed 2011/Sep/03 22:42:49  
Operator

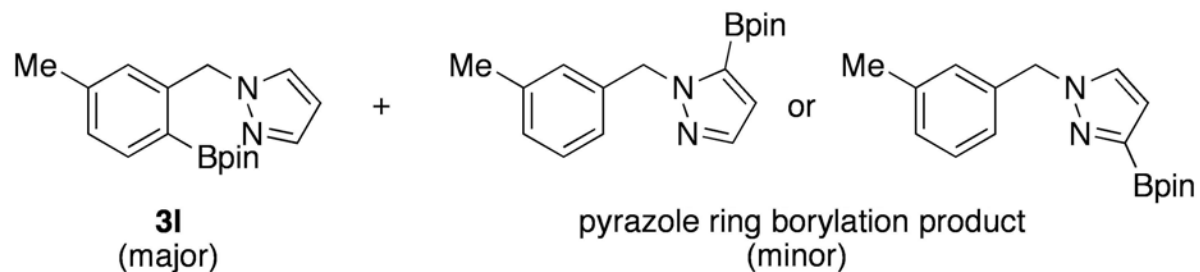

ratio of **3I**/pyrazole ring borylation =79:21

● peaks: **3I**

○ peaks: pyrazole ring borylation

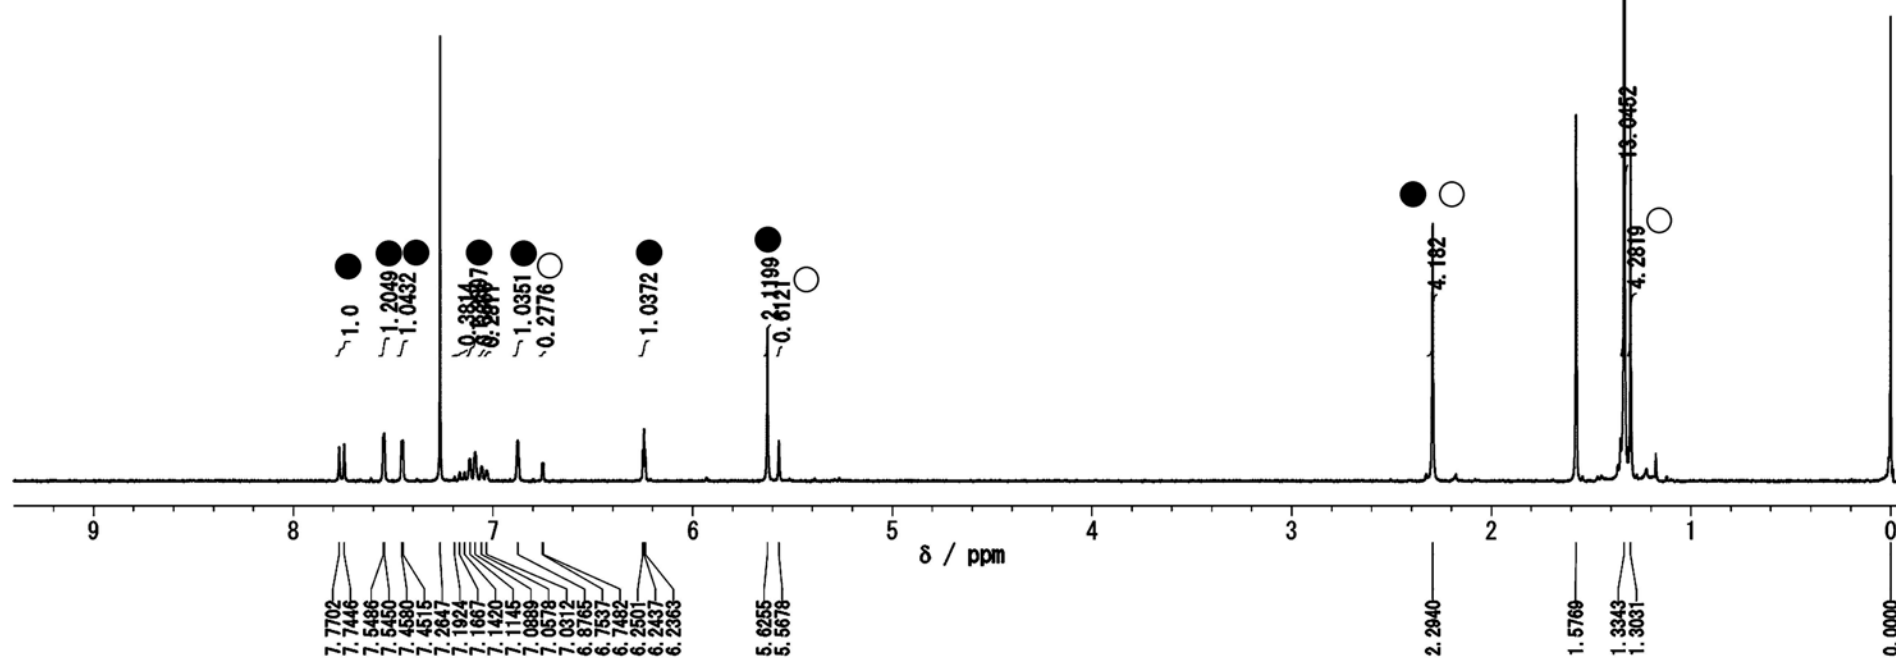

Original File:  
Date Aug 30 11  
Comment  
C13 Statdard Observe  
Stick=none Tune=6.4 Match=0.4

ObsNuc <sup>13</sup>C  
ExMode NON  
ObsFreq 75.43 MHz  
ObsSet -1.0 kHz  
ObsFine 996.3672 Hz  
Point 32768  
Frequency (Span) 18761.73 Hz  
Scan 224  
AcqTime 1.4992 s  
PD 1.501 s  
Pulse 6.0 μs  
Temperature 29.0 °C  
Solvent CDCl<sub>3</sub>  
Reference 77.0 ppm  
Broad.Factor 0.2863 Hz  
RGain 30  
Printed 2011/Sep/03 22:44:05  
Operator

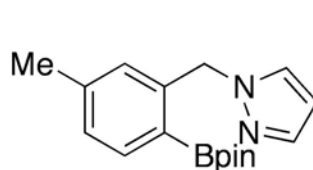

**3I**  
(major)

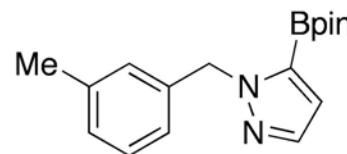

pyrazole ring borylation product  
(minor)

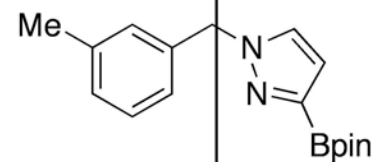

ratio of **3I**/pyrazole ring borylation = 79:21

● peaks: **3I**

○ peaks: pyrazole ring borylation

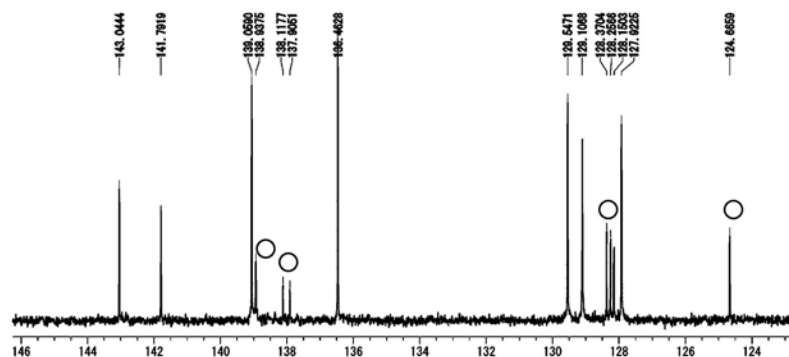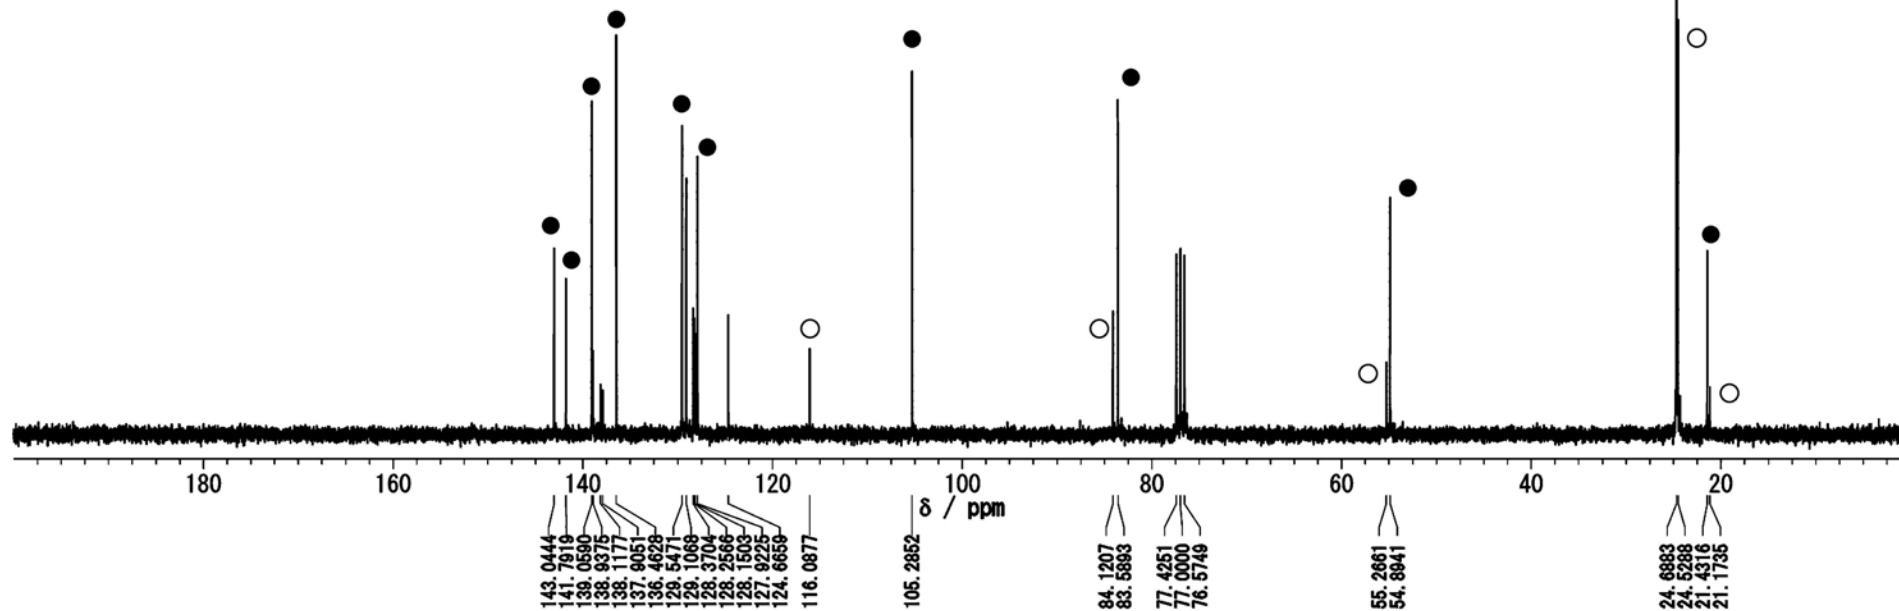

Original File:  
 Date Aug 20 11  
 Comment  
 STANDARD 1H OBSERVE

|                  |                      |
|------------------|----------------------|
| ObsNuc           | <sup>1</sup> H       |
| ExMode           | NON                  |
| ObsFreq          | 299.96 MHz           |
| ObsSet           | -1.0 kHz             |
| ObsPine          | 995.0047 Hz          |
| Point            | 16384                |
| Frequency (Span) | 4500.45 Hz           |
| Scan             | 16                   |
| AcqTime          | 3.4983 s             |
| PD               | 1.502 s              |
| Pulse1           | 6.0 $\mu$ s          |
| Temperature      | 29.0 $^{\circ}$ C    |
| Solvent          | CDCl <sub>3</sub>    |
| Reference        | 0.0 ppm              |
| Broad. Factor    | 0.1373 Hz            |
| RGain            | 24                   |
| Printed          | 2011/Sep/03 22:45:34 |
| Operator         |                      |

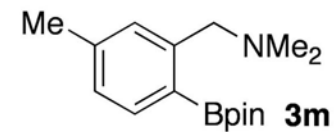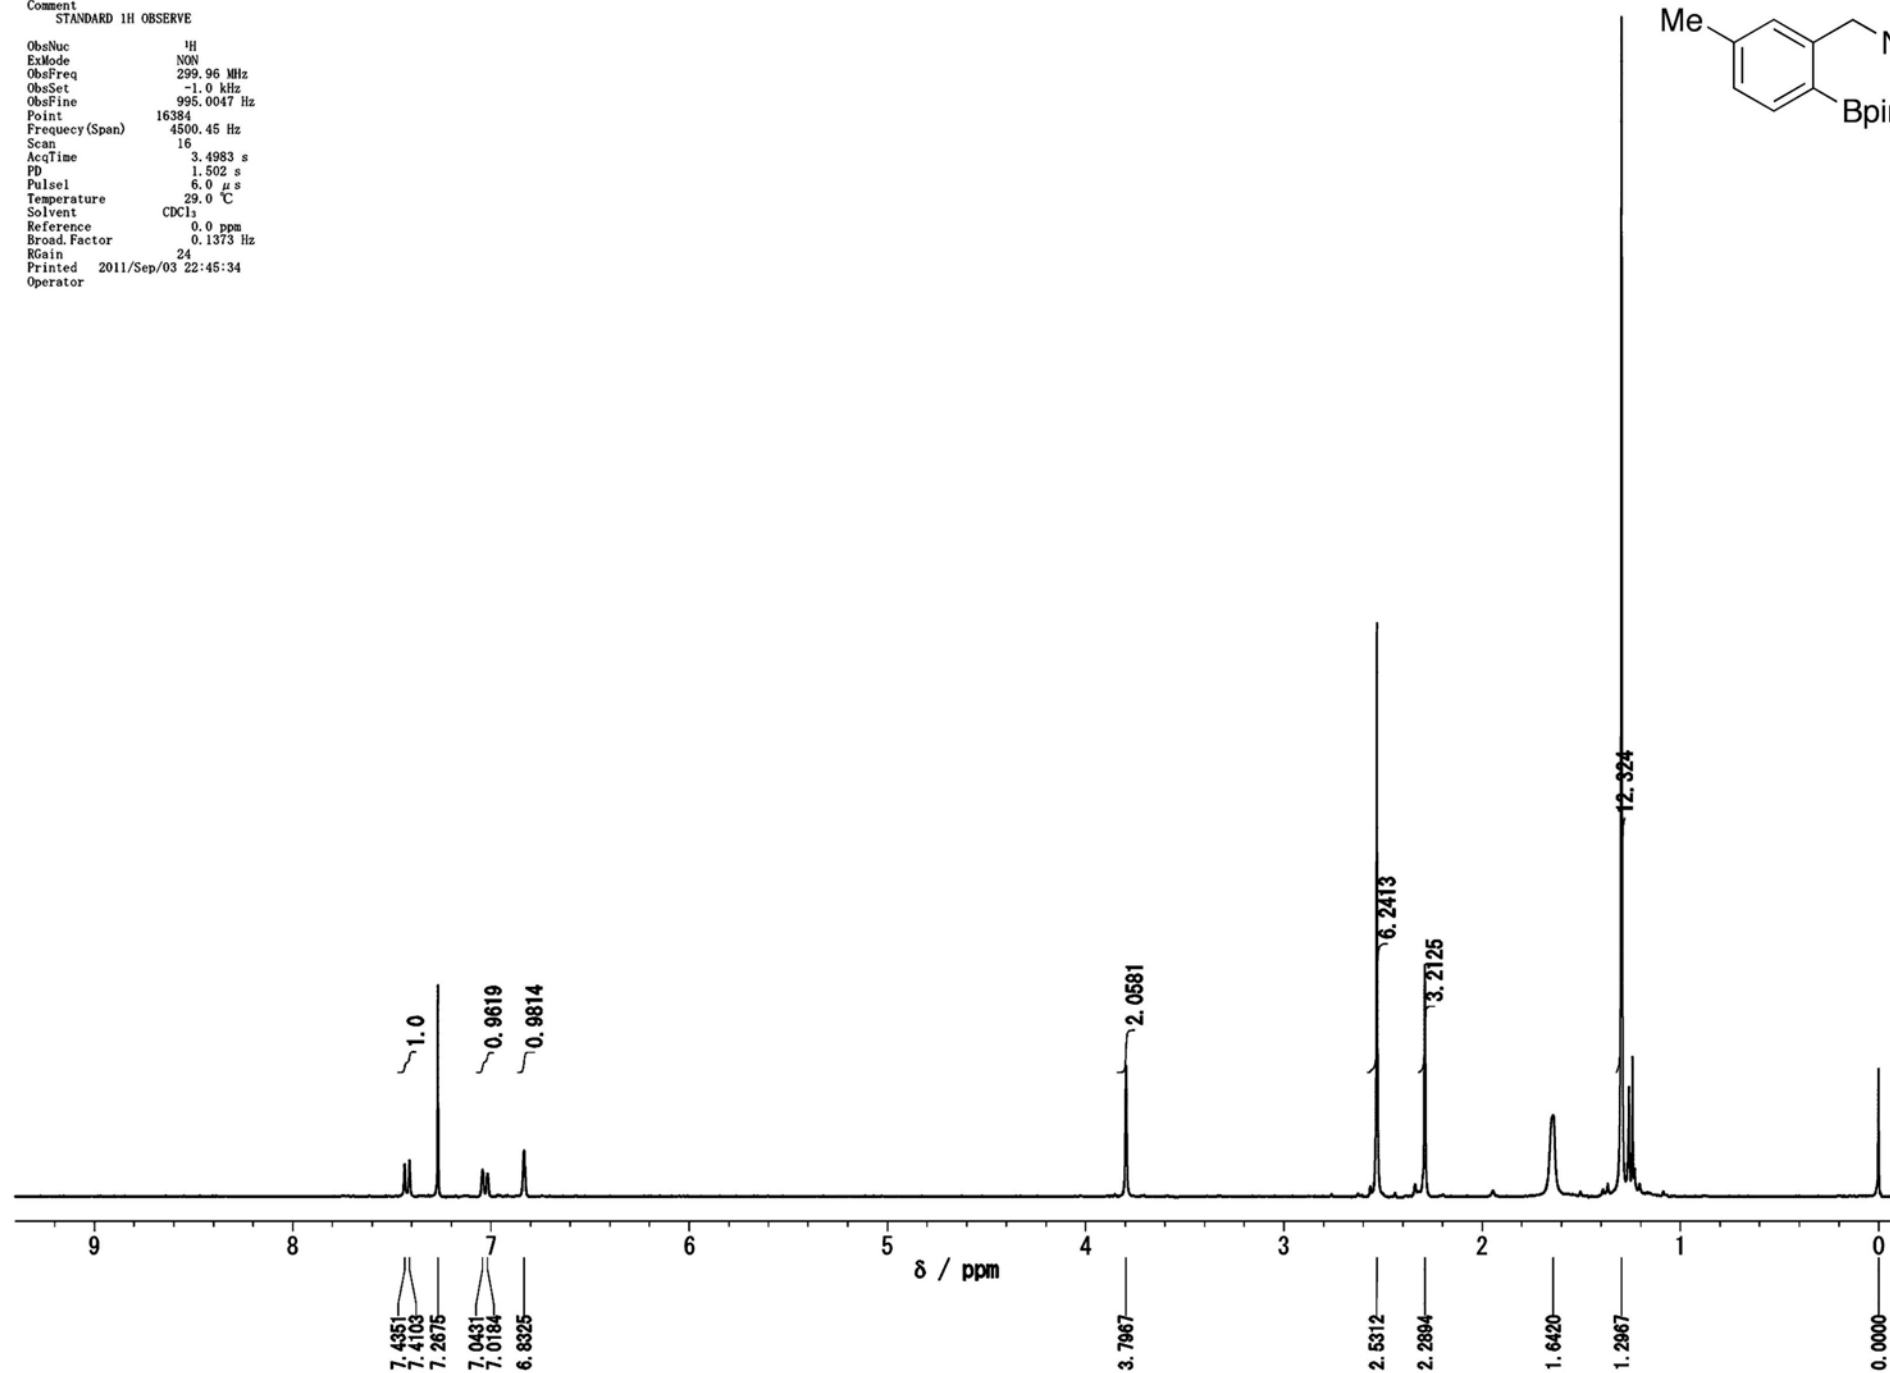

Original File:  
 Date Aug 20 11  
 Comment  
 C13 Statdard Observe  
 Stick=none Tune=6.4 Match=0.4

ObsNuc <sup>13</sup>C  
 ExMode NON  
 ObsFreq 75.43 MHz  
 ObsSet -1.0 kHz  
 ObsFine 996.3672 Hz  
 Point 32768  
 Frequency (Span) 18761.73 Hz  
 Scan 144  
 AcqTime 1.4992 s  
 PD 1.501 s  
 Pulsel 6.0  $\mu$ s  
 Temperature 29.0  $^{\circ}$ C  
 Solvent CDCl<sub>3</sub>  
 Reference 77.0 ppm  
 Broad.Factor 0.2863 Hz  
 RGain 30  
 Printed 2011/Sep/03 22:46:32  
 Operator

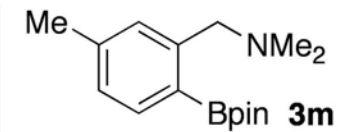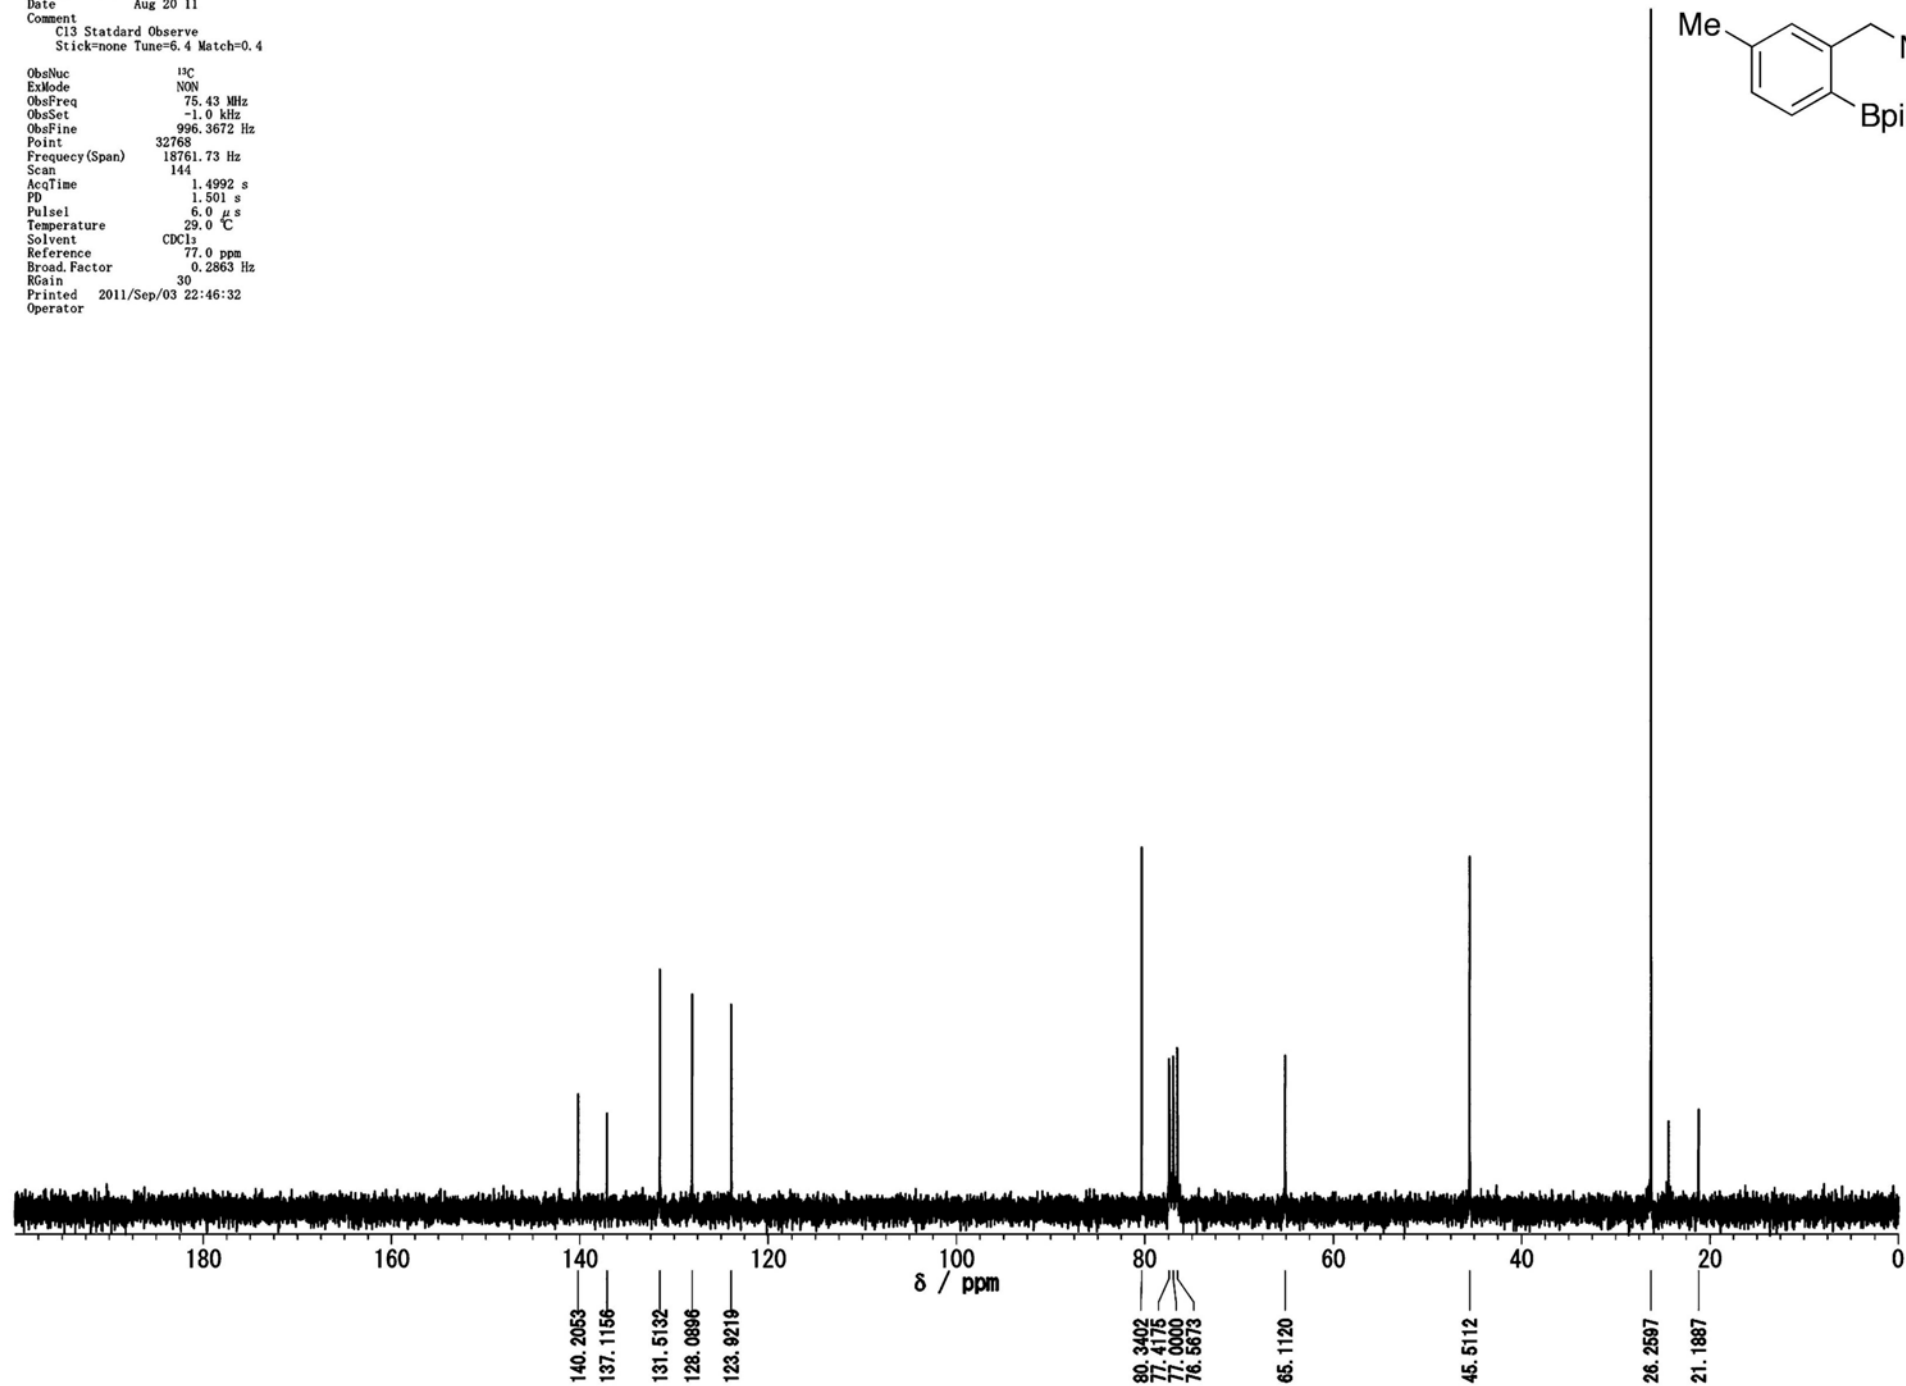



Original File:  
 Date Aug 25 11  
 Comment  
 STANDARD 1H OBSERVE

ObsNuc <sup>1</sup>H  
 ExMode NON  
 ObsFreq 299.96 MHz  
 ObsSet -1.0 kHz  
 ObsPine 995.0047 Hz  
 Point 16384  
 Frequency (Span) 4500.45 Hz  
 Scan 16  
 AcqTime 3.4983 s  
 PD 1.502 s  
 Pulse 6.0  $\mu$ s  
 Temperature 29.0  $^{\circ}$ C  
 Solvent CDCl<sub>3</sub>  
 Reference 0.0 ppm  
 Broad Factor 0.1373 Hz  
 RGain 26  
 Printed 2011/Sep/03 22:47:36  
 Operator

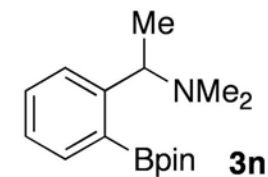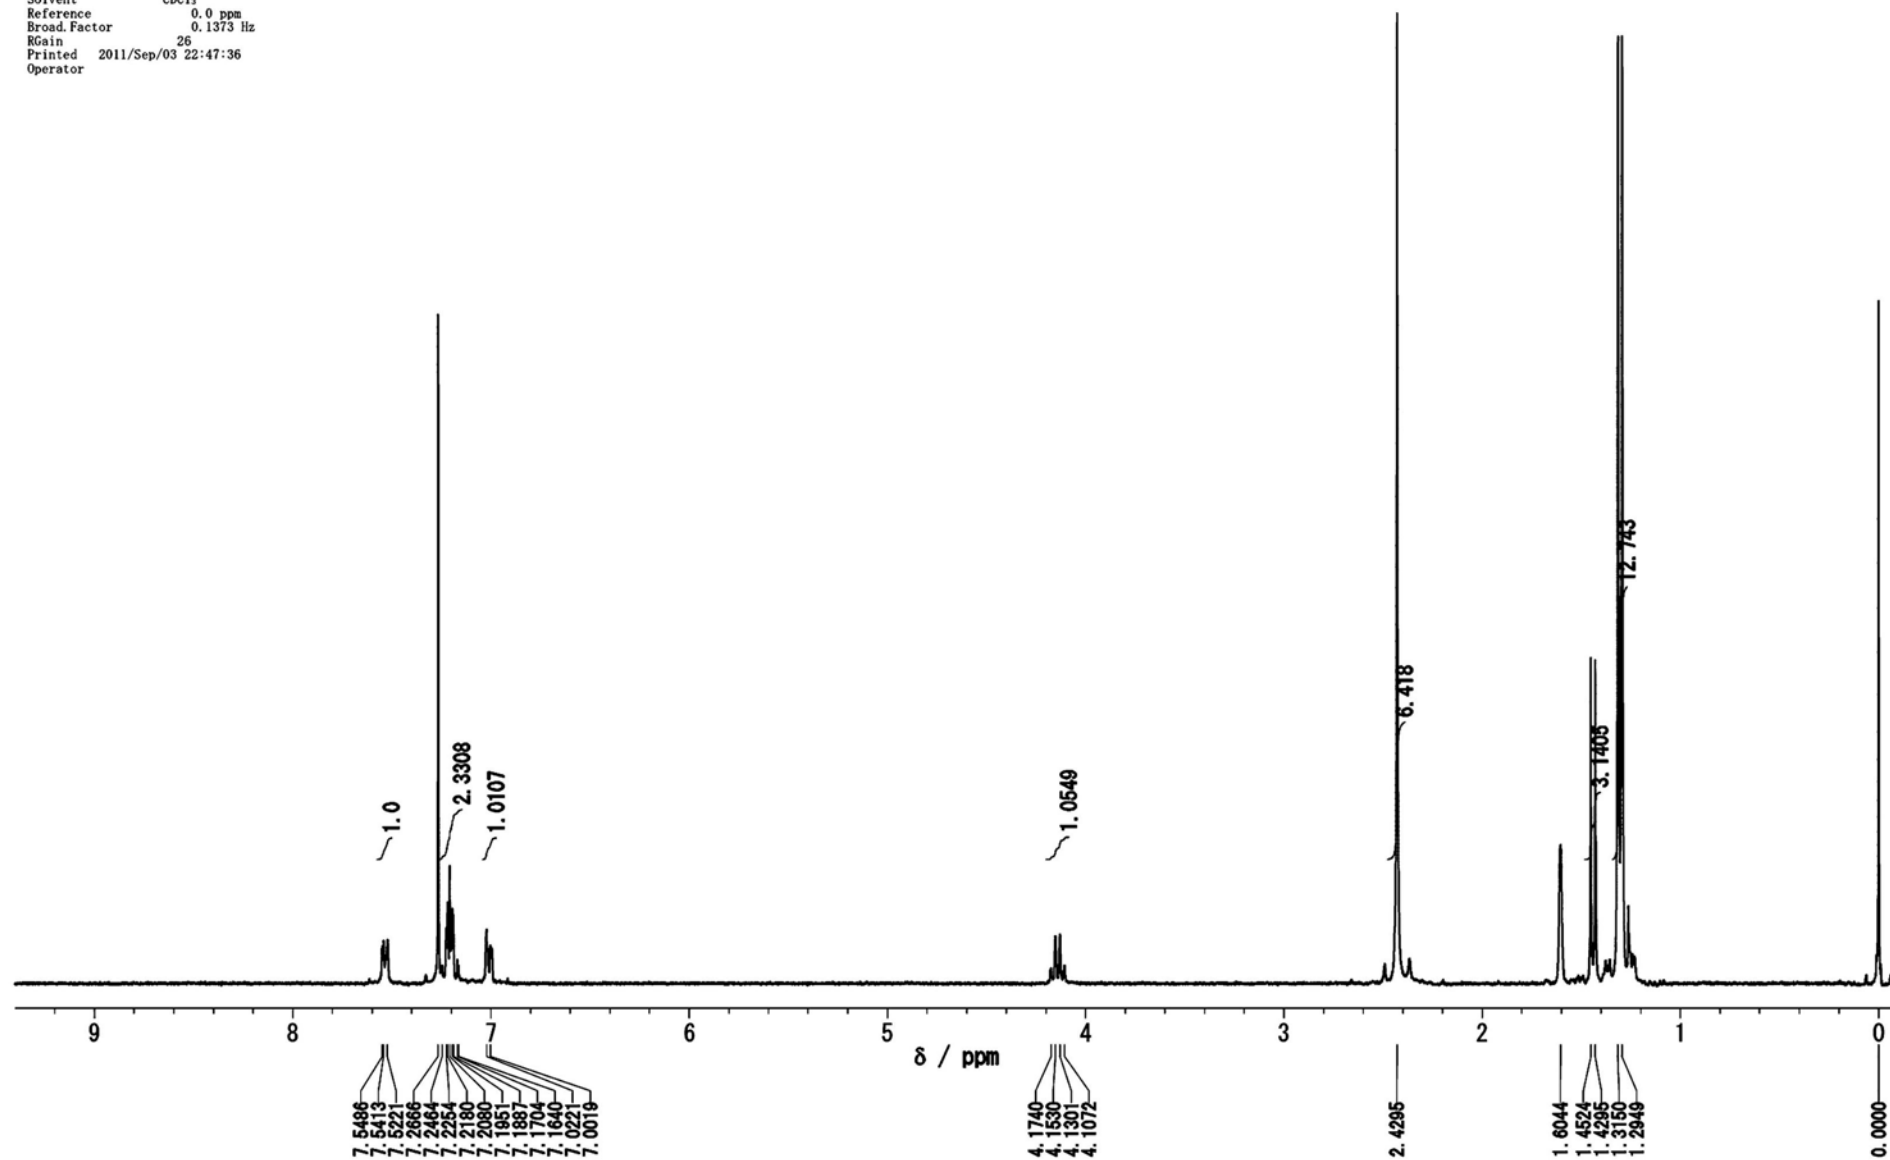

Original File:  
 Date Aug 28 11  
 Comment  
 C13 Statdard Observe  
 Stick=none Tune=6.4 Match=0.4

ObsNuc  $^{13}\text{C}$   
 ExMode NON  
 ObsFreq 75.43 MHz  
 ObsSet -1.0 kHz  
 ObsFine 996.3672 Hz  
 Point 32768  
 Frequency (Span) 18761.73 Hz  
 Scan 9744  
 AcqTime 1.4992 s  
 PD 1.501 s  
 Pulsel 6.0  $\mu\text{s}$   
 Temperature 29.0  $^{\circ}\text{C}$   
 Solvent  $\text{CDCl}_3$   
 Reference 77.0 ppm  
 Broad.Factor 0.2863 Hz  
 RGain 30  
 Printed 2011/Sep/03 22:49:16  
 Operator

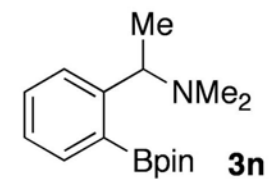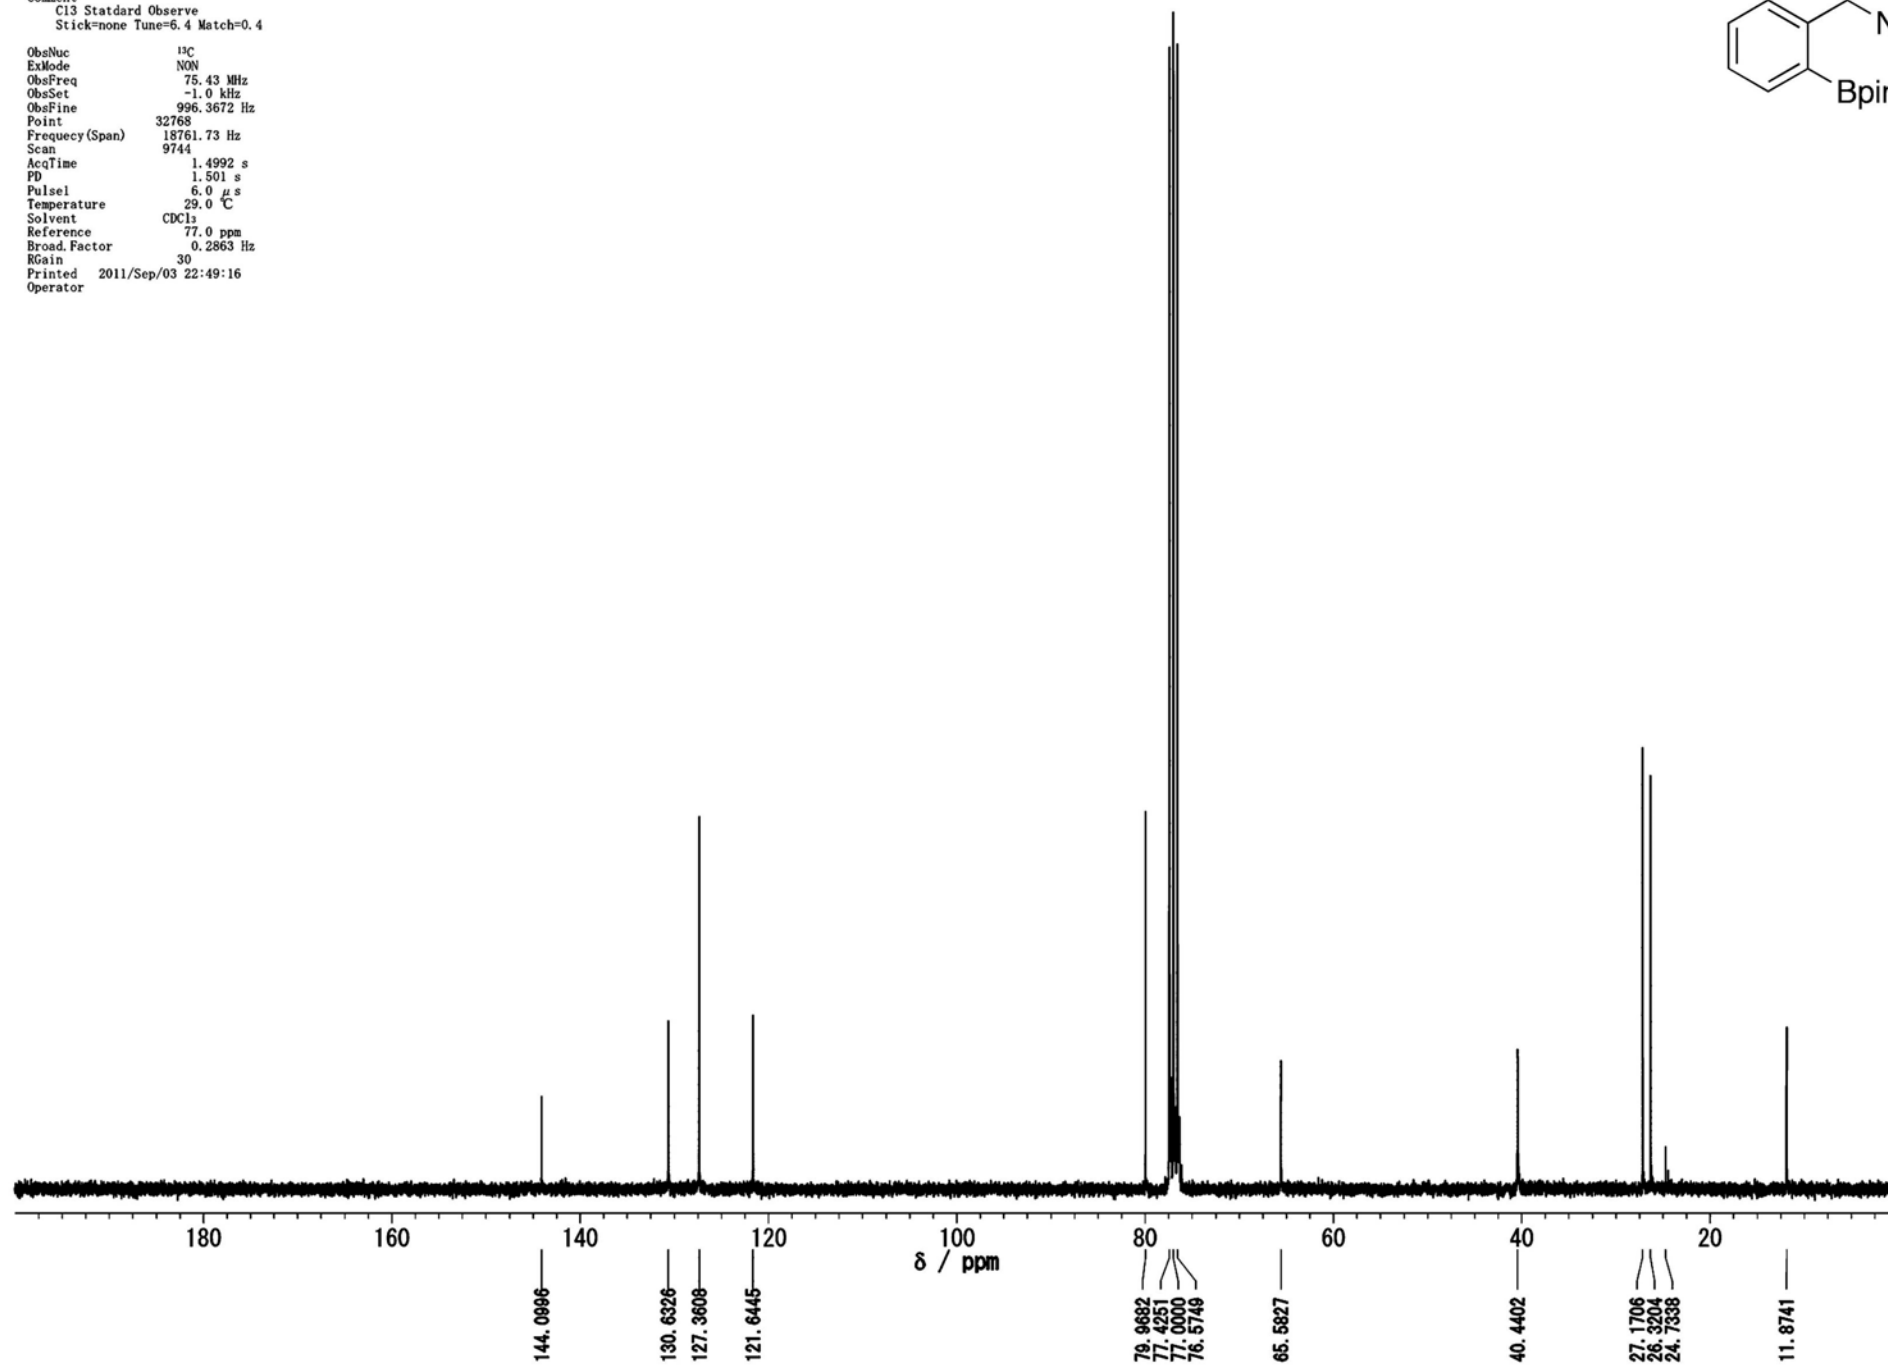

Original File:  
 Date Aug 25 11  
 Comment  
 STANDARD 1H OBSERVE

ObsNuc <sup>1</sup>H  
 ExMode NON  
 ObsFreq 299.96 MHz  
 ObsSet -1.0 kHz  
 ObsPine 995.0047 Hz  
 Point 16384  
 Frequency (Span) 4500.45 Hz  
 Scan 16  
 AcqTime 3.4983 s  
 PD 1.502 s  
 Pulse 6.0  $\mu$ s  
 Temperature 29.0  $^{\circ}$ C  
 Solvent CDCl<sub>3</sub>  
 Reference 0.0 ppm  
 Broad Factor 0.1373 Hz  
 RGain 26  
 Printed 2011/Sep/03 22:50:18  
 Operator

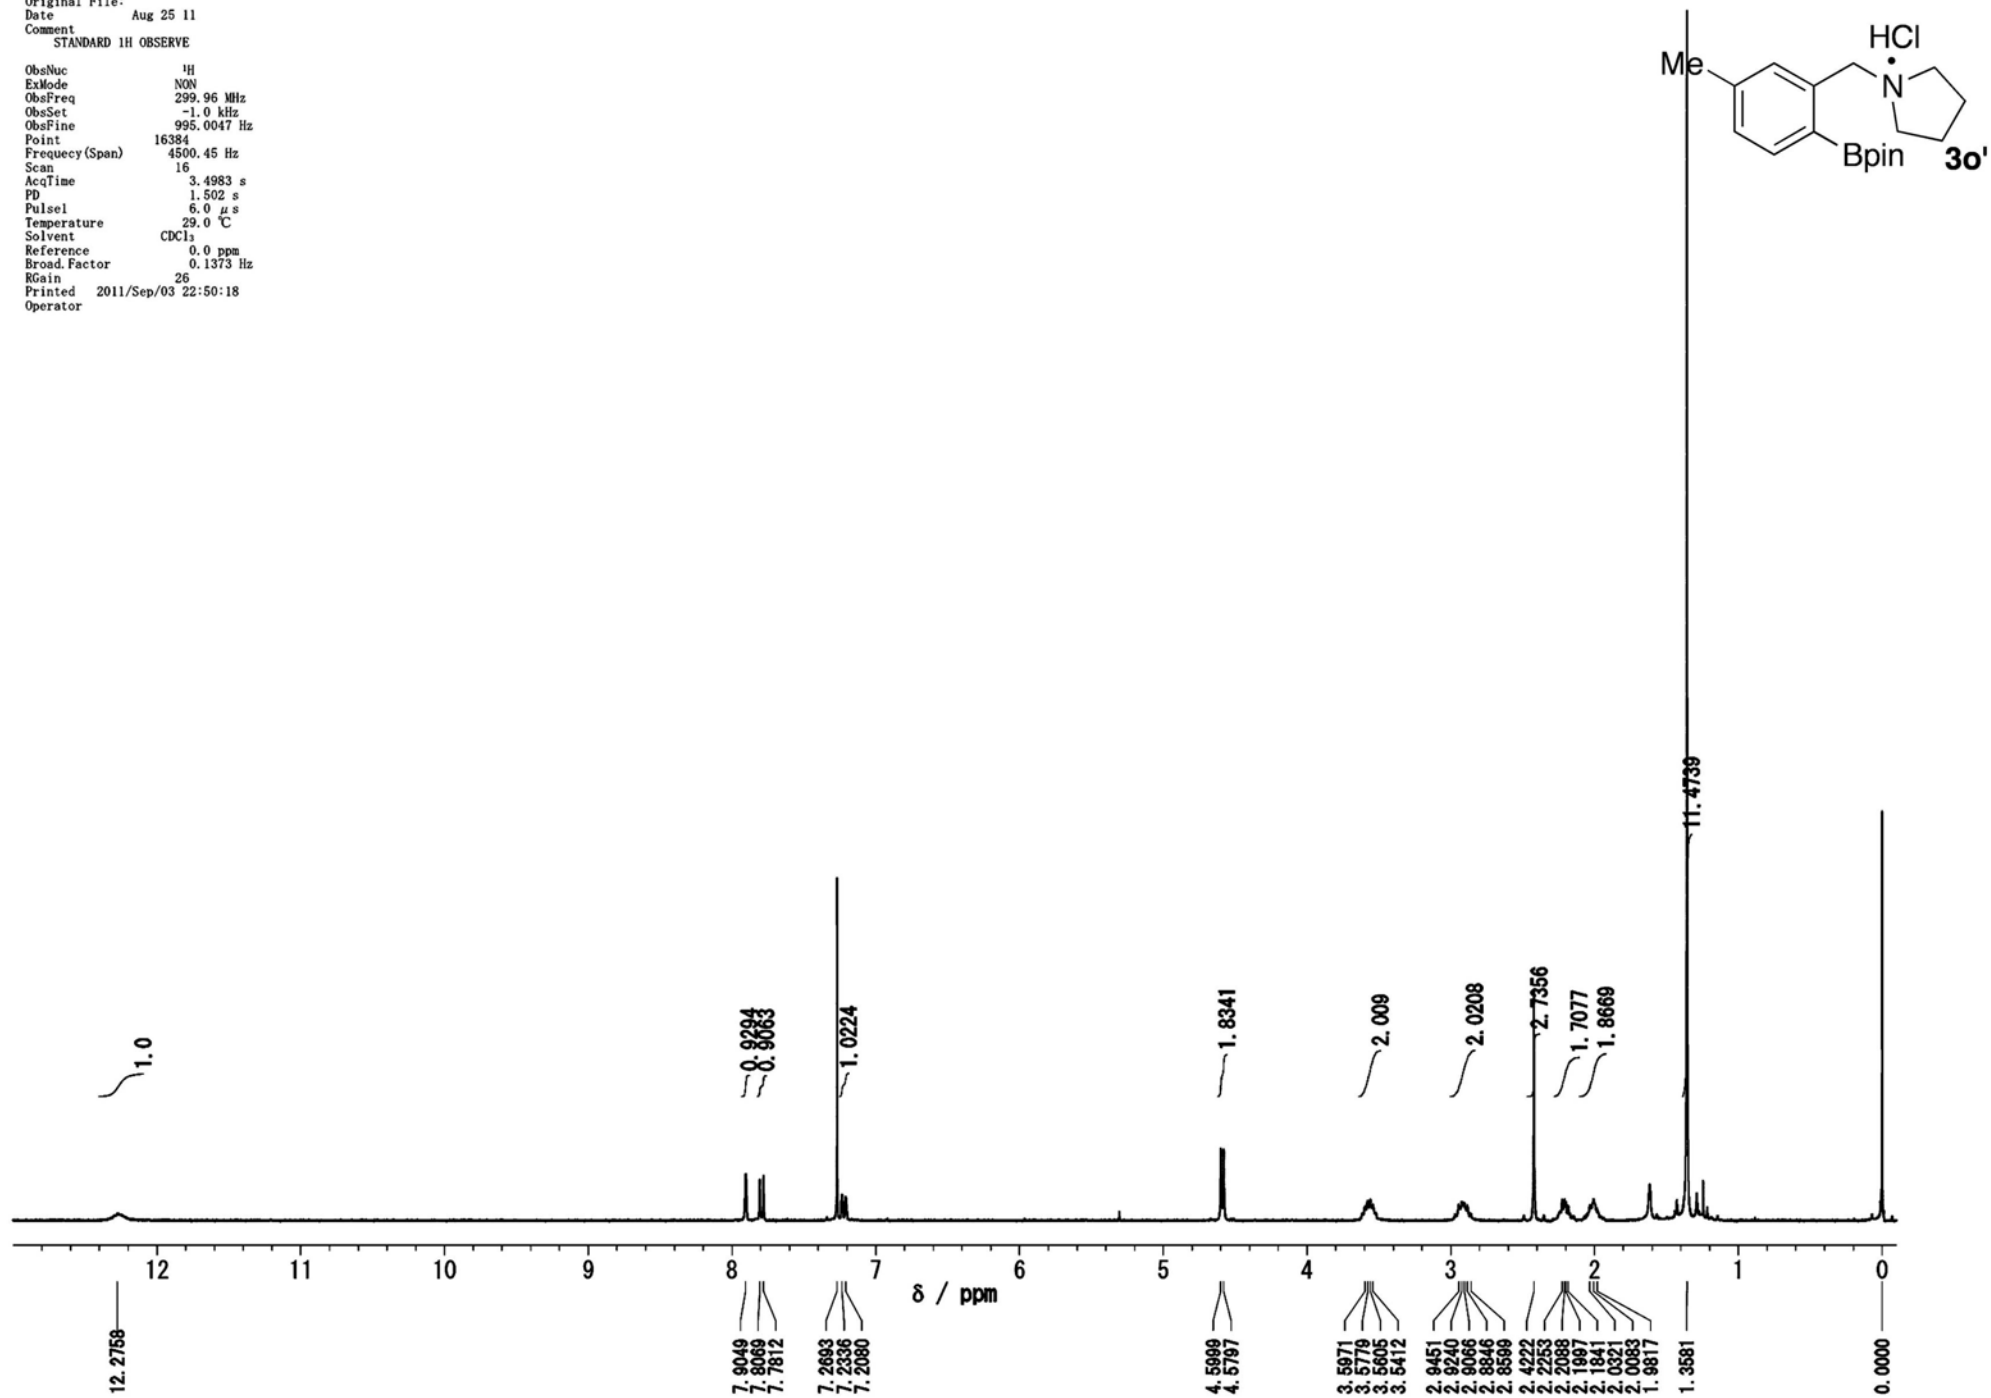

Original File:  
 Date Aug 27 11  
 Comment  
 C13 Statdard Observe  
 Stick=none Tune=6.4 Match=0.4

ObsNuc <sup>13</sup>C  
 ExMode NON  
 ObsFreq 75.43 MHz  
 ObsSet -1.0 kHz  
 ObsFine 996.3672 Hz  
 Point 32768  
 Frequency (Span) 18761.73 Hz  
 Scan 160  
 AcqTime 1.4992 s  
 PD 1.501 s  
 Pulsel 6.0  $\mu$ s  
 Temperature 29.0  $^{\circ}$ C  
 Solvent CDCl<sub>3</sub>  
 Reference 77.0 ppm  
 Broad.Factor 0.2863 Hz  
 RGain 30  
 Printed 2011/Sep/03 22:51:31  
 Operator

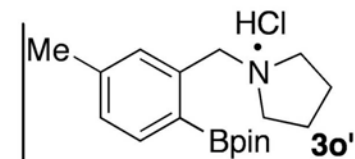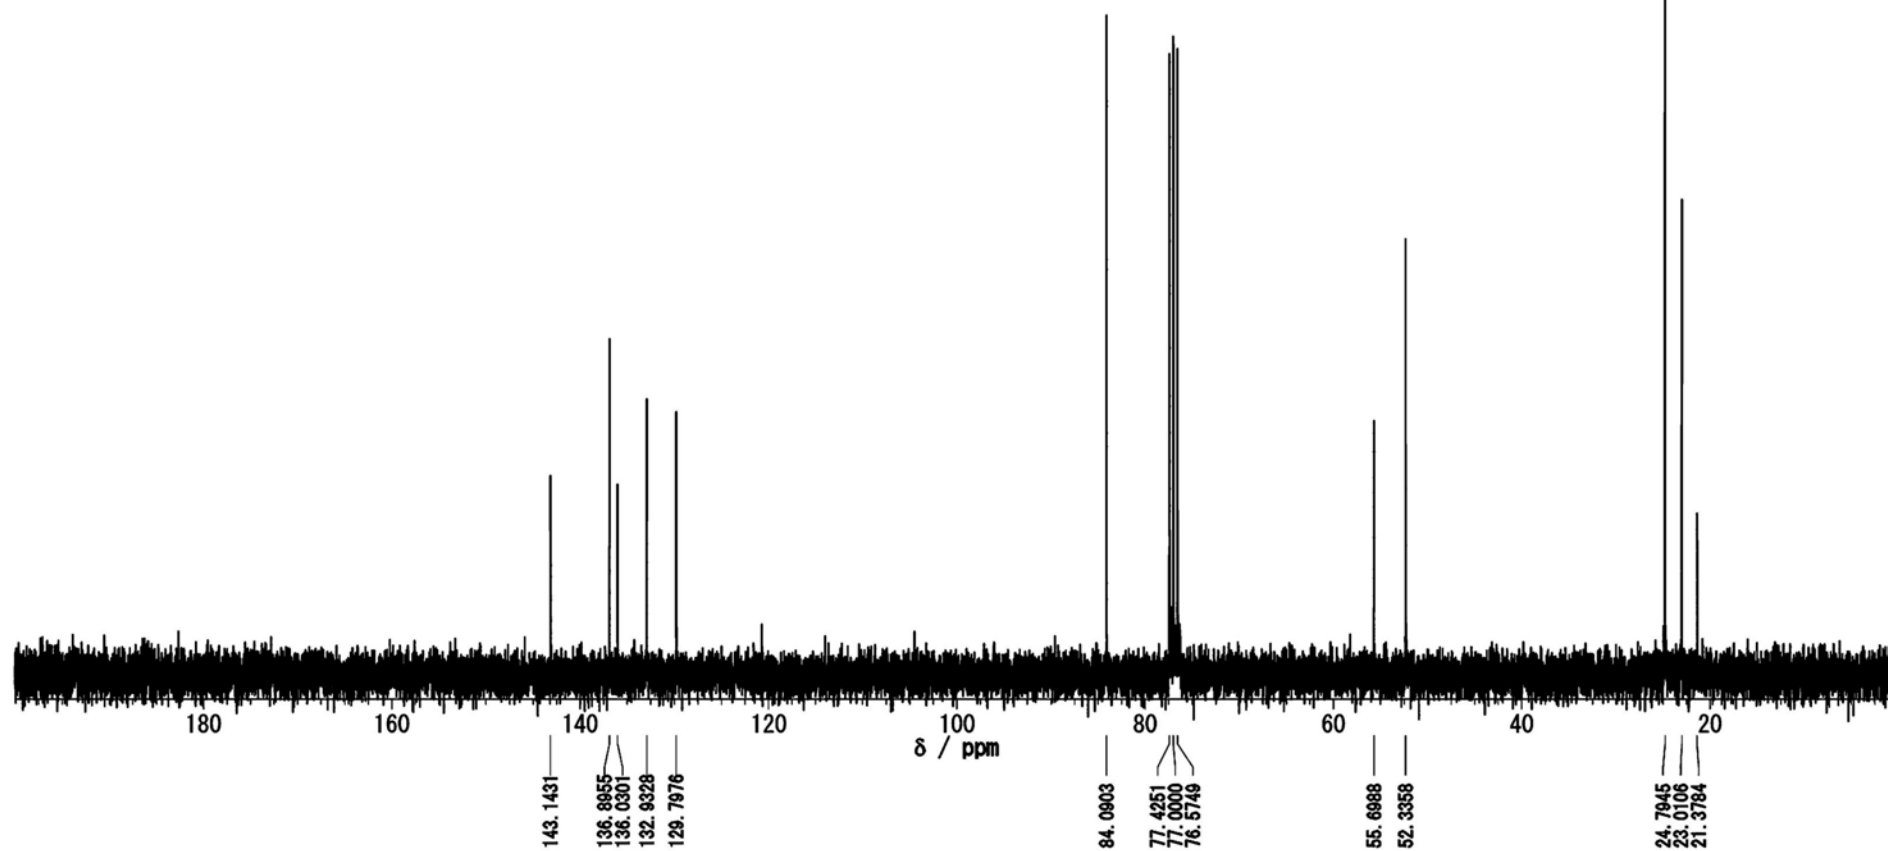

Original File:   
 Date Jul 21 11   
 Comment   
 STANDARD 1H OBSERVE   
 ObsNuc <sup>1</sup>H   
 ExMode NON   
 ObsFreq 299.96 MHz   
 ObsSet -1.0 kHz   
 ObsPine 995.0047 Hz   
 Point 16384   
 Frequency (Span) 4500.45 Hz   
 Scan 32   
 AcqTime 3.4983 s   
 PD 1.502 s   
 Pulse 6.0  $\mu$ s   
 Temperature 29.0  $^{\circ}$ C   
 Solvent CDCl<sub>3</sub>   
 Reference 0.0 ppm   
 Broad Factor 0.1373 Hz   
 RGain 12   
 Printed 2011/Sep/03 22:52:39   
 Operator

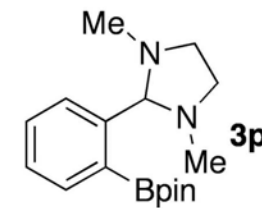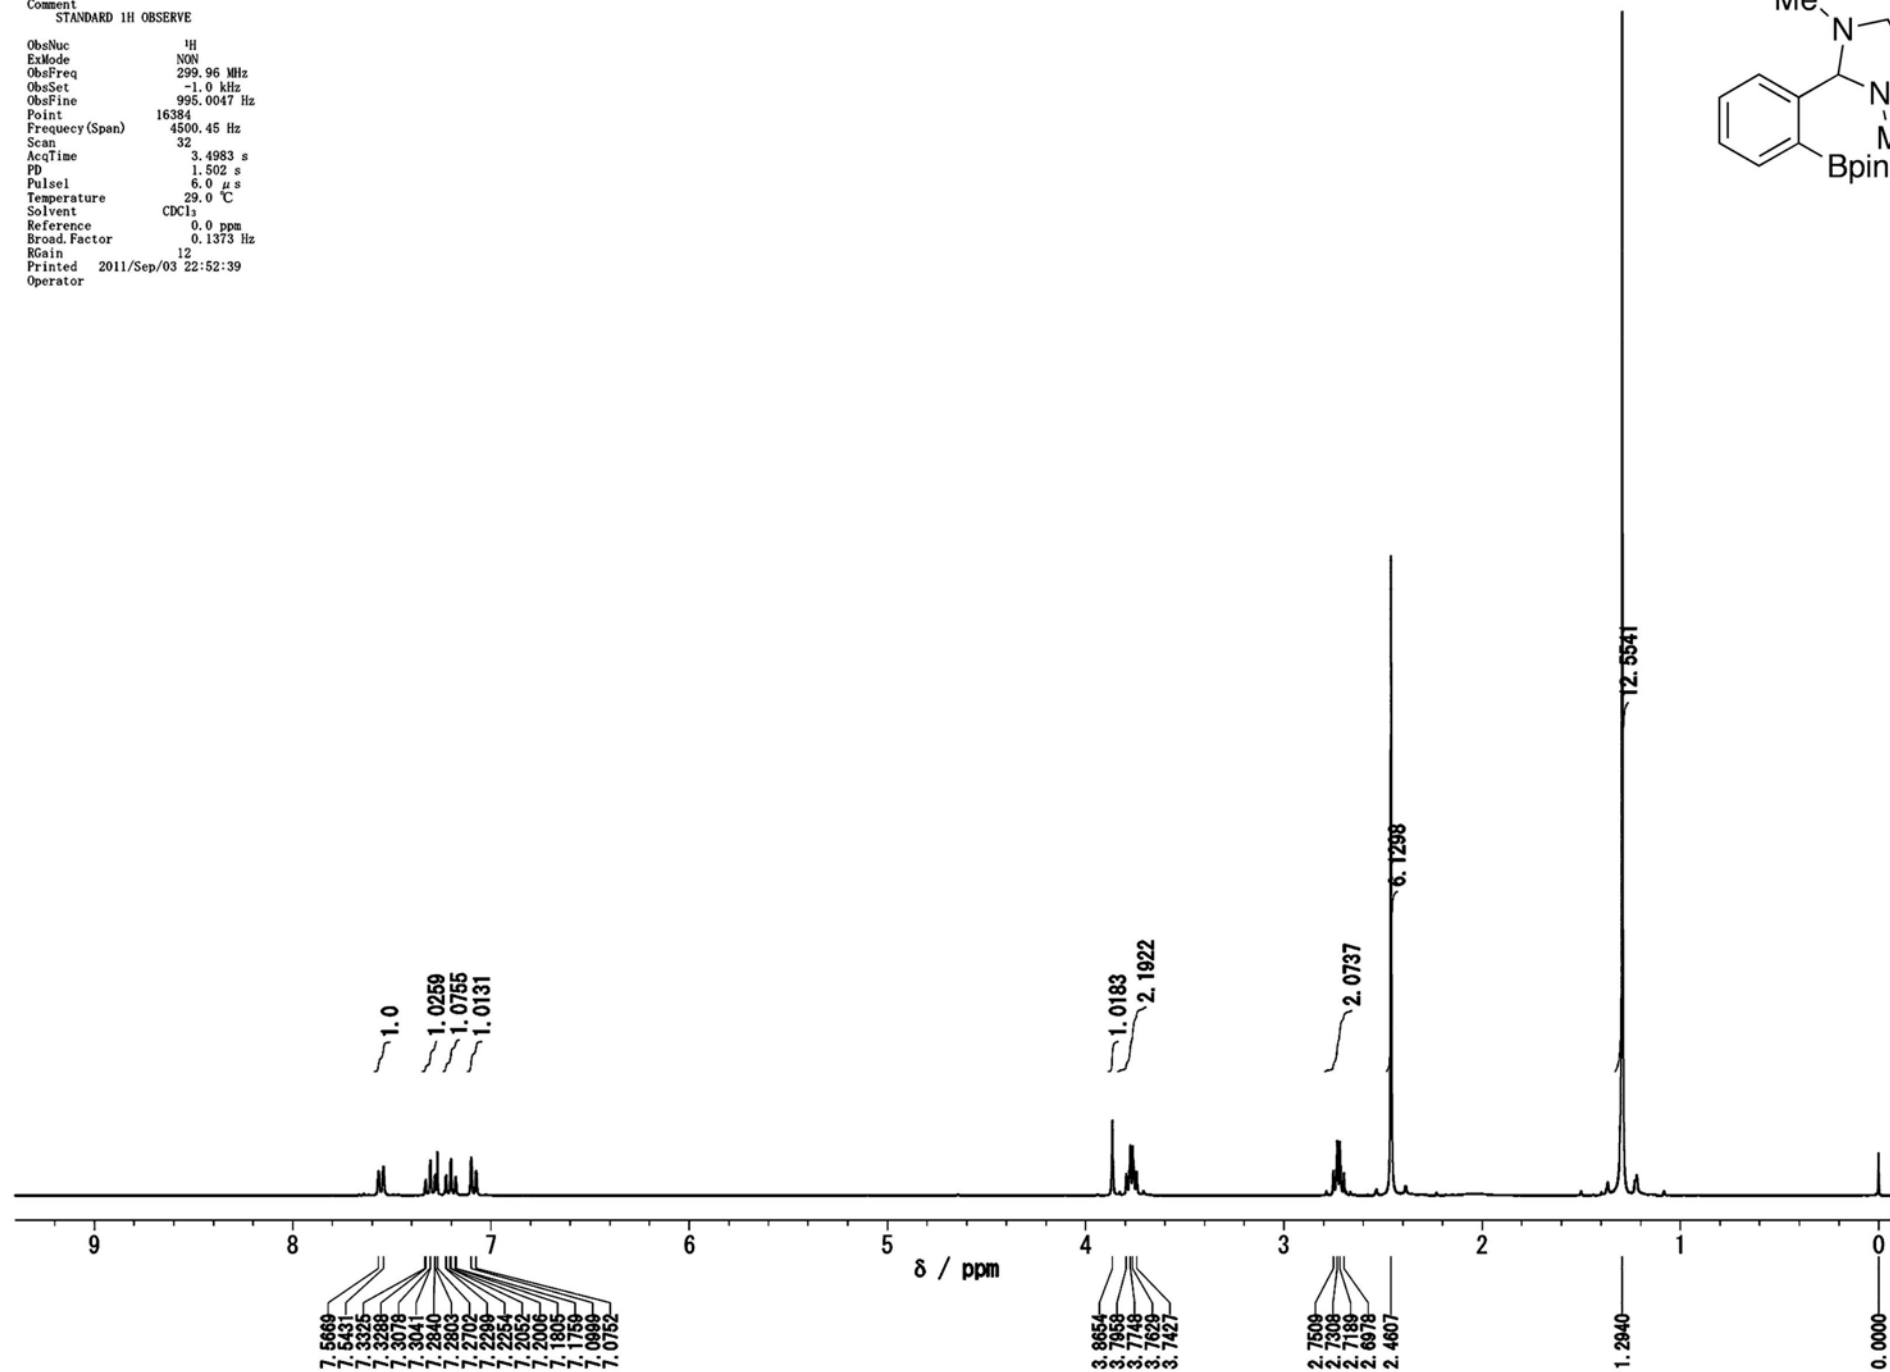

Original File: Jul 21 11  
 Date: Jul 21 11  
 Comment: C13 Statdard Observe  
 Stick=none Tune=6.4 Match=0.4

ObsNuc: <sup>13</sup>C  
 ExMode: NON  
 ObsFreq: 75.43 MHz  
 ObsSet: -1.0 kHz  
 ObsFine: 996.3672 Hz  
 Point: 32768  
 Frequency (Span): 18761.73 Hz  
 Scan: 112  
 AcqTime: 1.4992 s  
 PD: 1.501 s  
 Pulse: 6.0 μs  
 Temperature: 29.0 °C  
 Solvent: CDCl<sub>3</sub>  
 Reference: 77.0 ppm  
 Broad.Factor: 0.2863 Hz  
 RGain: 30  
 Printed: 2011/Sep/03 22:54:08  
 Operator:

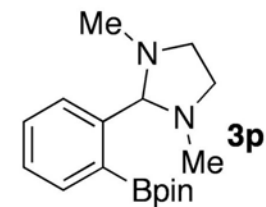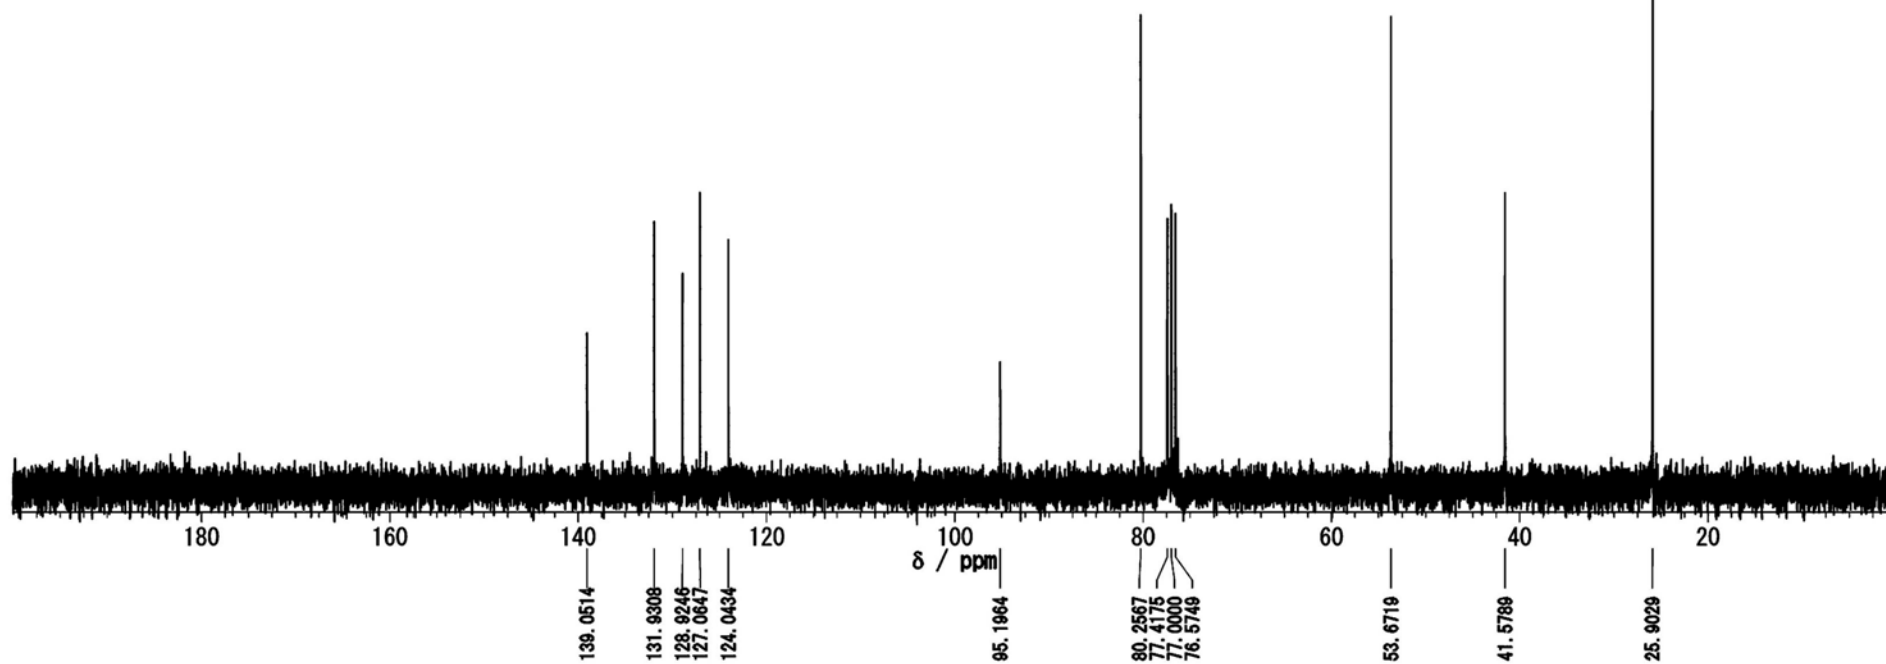

Original File: Jul 25 11  
 Date: Jul 25 11  
 Comment: STANDARD 1H OBSERVE  
 ObsNuc: <sup>1</sup>H  
 ExMode: NON  
 ObsFreq: 299.96 MHz  
 ObsSet: -1.0 kHz  
 ObsPine: 995.0047 Hz  
 Point: 16384  
 Frequency (Span): 4500.45 Hz  
 Scan: 16  
 AcqTime: 3.4983 s  
 PD: 1.502 s  
 Pulse1: 6.0 μs  
 Temperature: 29.0 °C  
 Solvent: CDCl<sub>3</sub>  
 Reference: 0.0 ppm  
 Broad Factor: 0.1373 Hz  
 RGain: 29  
 Printed: 2011/Jul/28 15:44:44  
 Operator:

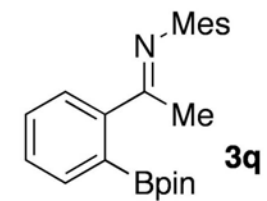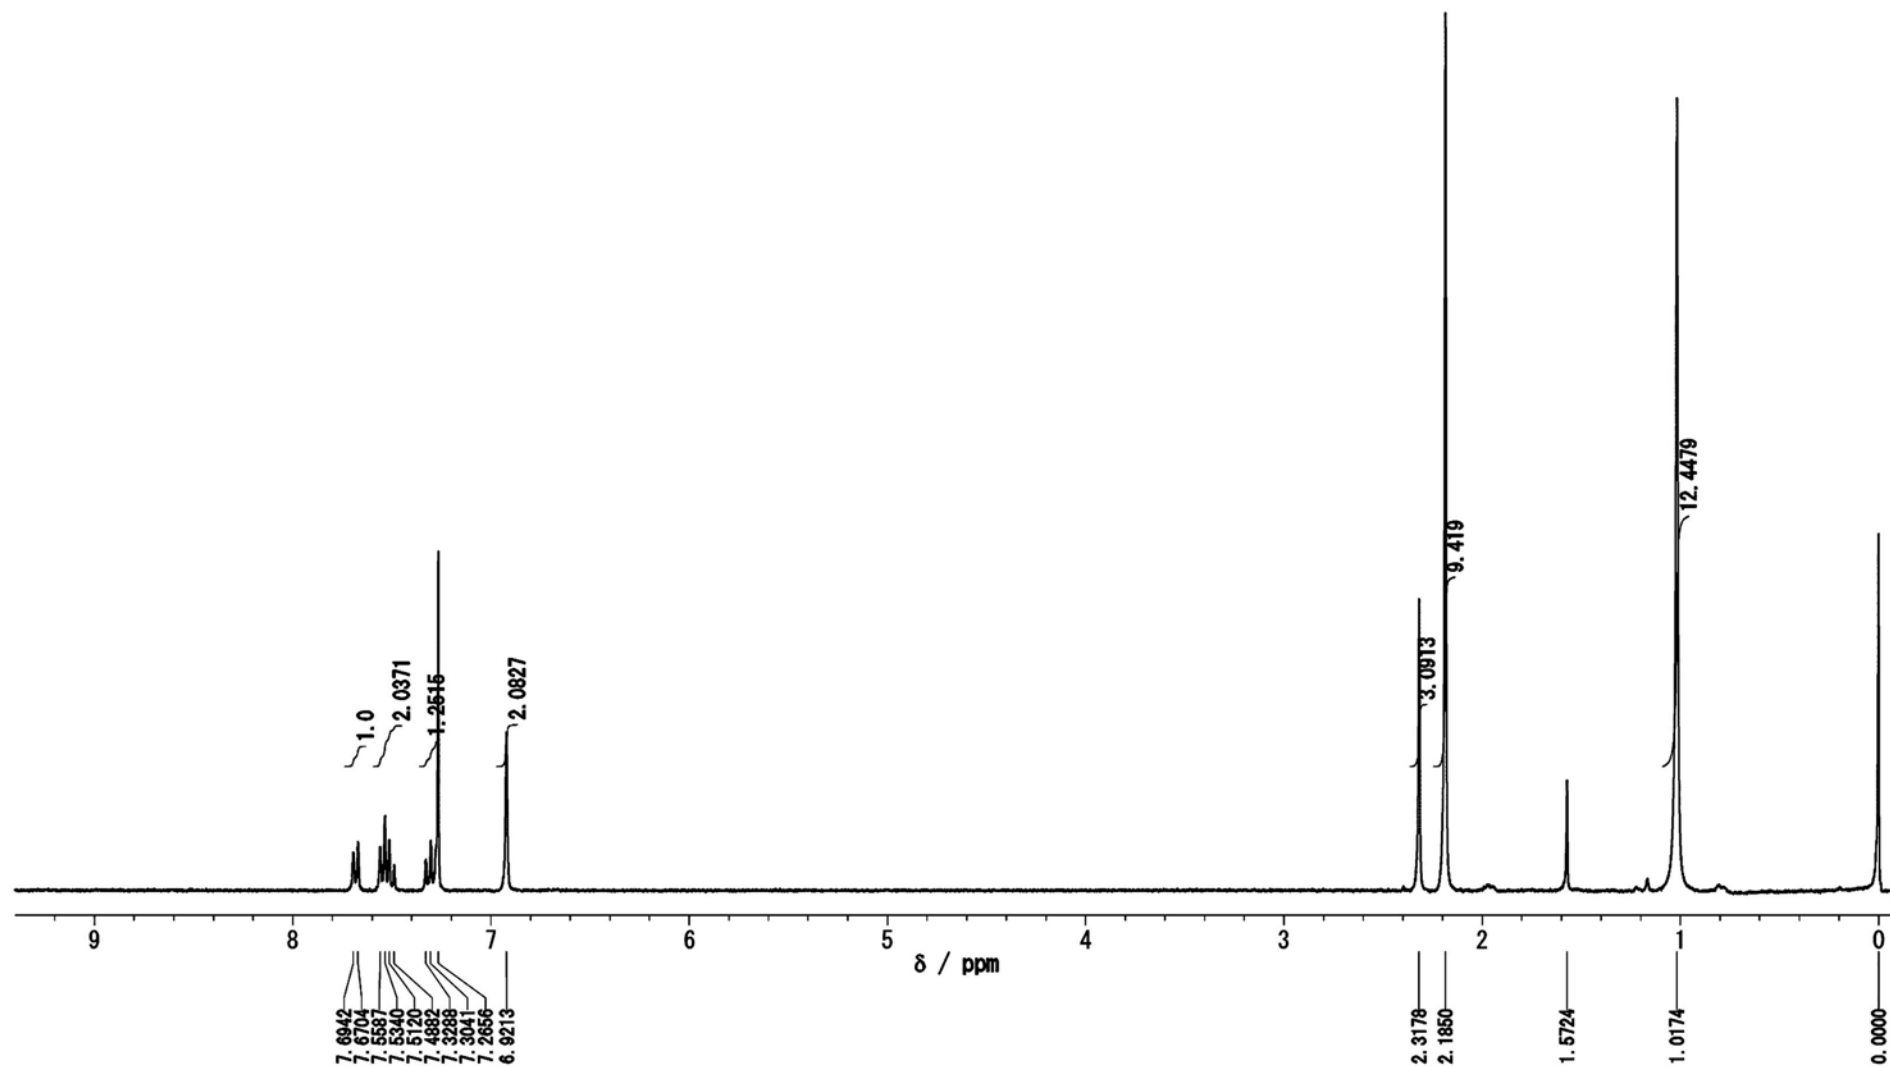

Original File:  
Date Jul 25 11  
Comment  
C13 Statdard Observe  
Stick=none Tune=6.4 Match=0.4

ObsNuc <sup>13</sup>C  
ExMode NON  
ObsFreq 75.43 MHz  
ObsSet -1.0 kHz  
ObsFine 996.3672 Hz  
Point 32768  
Frequency (Span) 18761.73 Hz  
Scan 10000  
AcqTime 1.4992 s  
PD 1.501 s  
Pulse 6.0  $\mu$ s  
Temperature 29.0  $^{\circ}$ C  
Solvent CDCl<sub>3</sub>  
Reference 77.0 ppm  
Broad Factor 0.2863 Hz  
RGain 30  
Printed 2011/Jul/28 15:46:18  
Operator

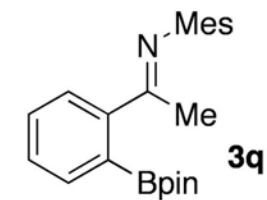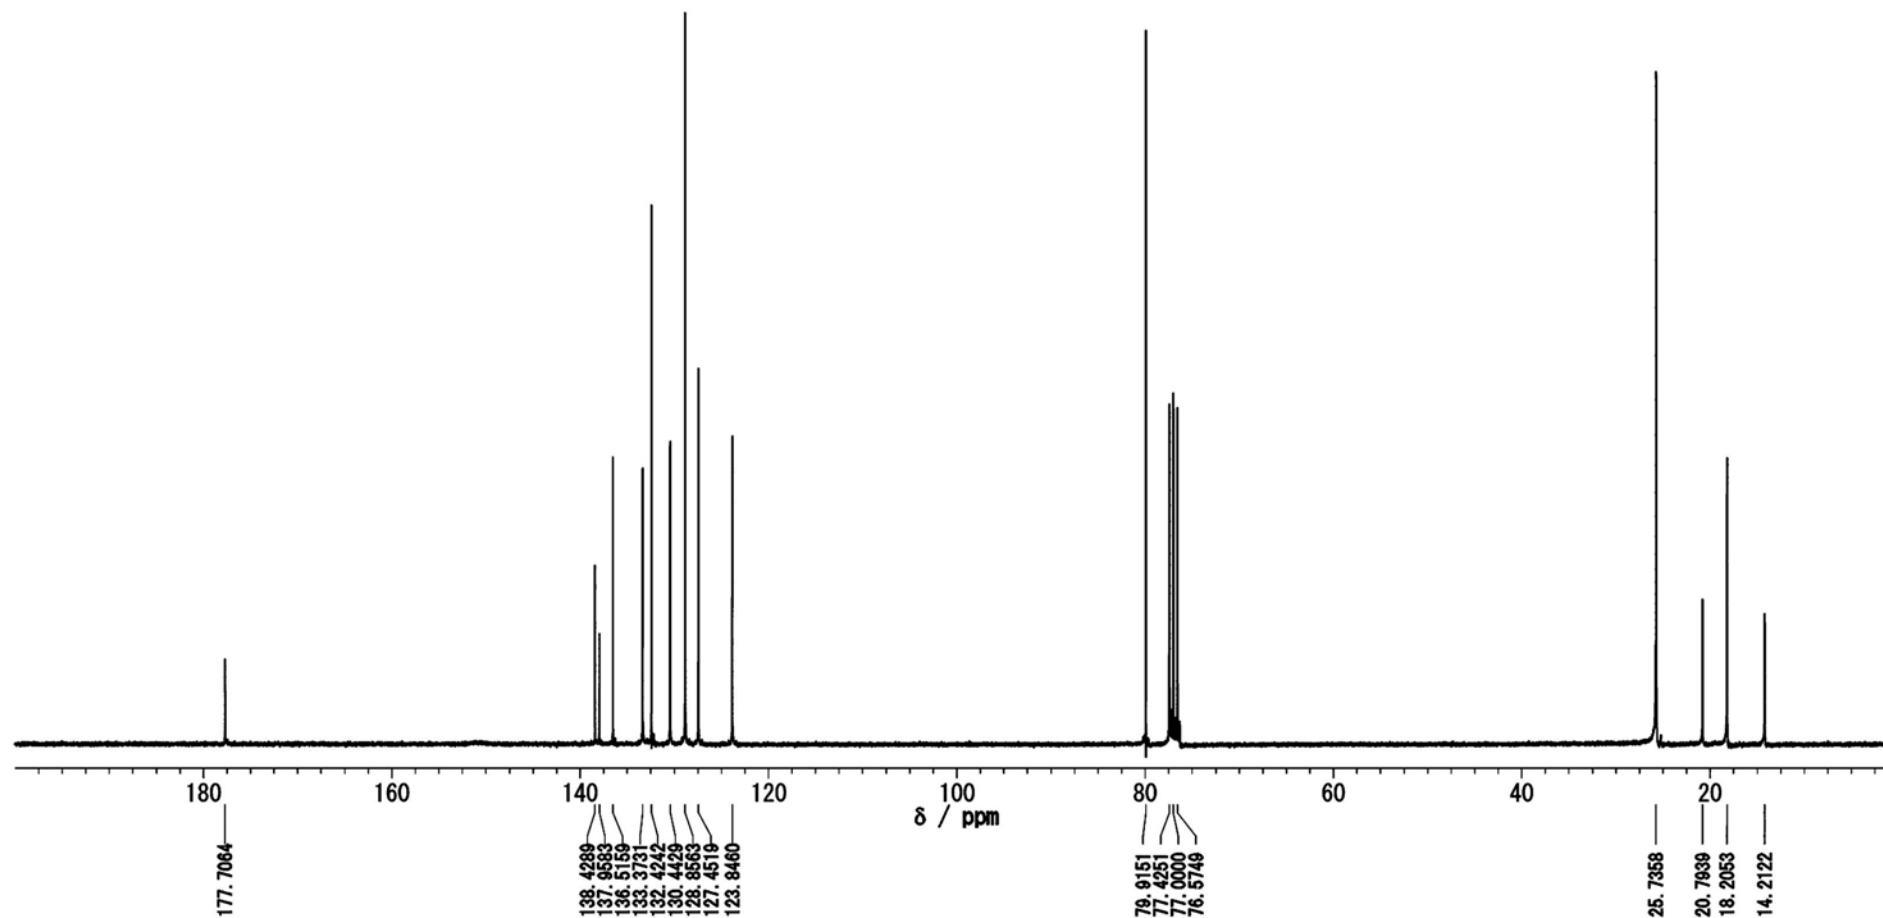



Original File:  
 Date Jun 14 11  
 Comment  
 STANDARD 1H OBSERVE

ObsNuc <sup>1</sup>H  
 ExMode NON  
 ObsFreq 299.96 MHz  
 ObsSet -1.0 kHz  
 ObsPine 995.0047 Hz  
 Point 16384  
 Frequency (Span) 4500.45 Hz  
 Scan 16  
 AcqTime 3.4983 s  
 PD 1.502 s  
 Pulse 6.0  $\mu$ s  
 Temperature 29.0  $^{\circ}$ C  
 Solvent CDCl<sub>3</sub>  
 Reference 0.0 ppm  
 Broad Factor 0.1373 Hz  
 RGain 19  
 Printed 2011/Sep/03 22:55:10  
 Operator

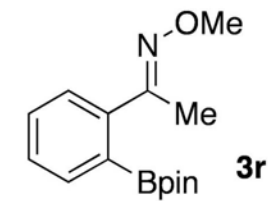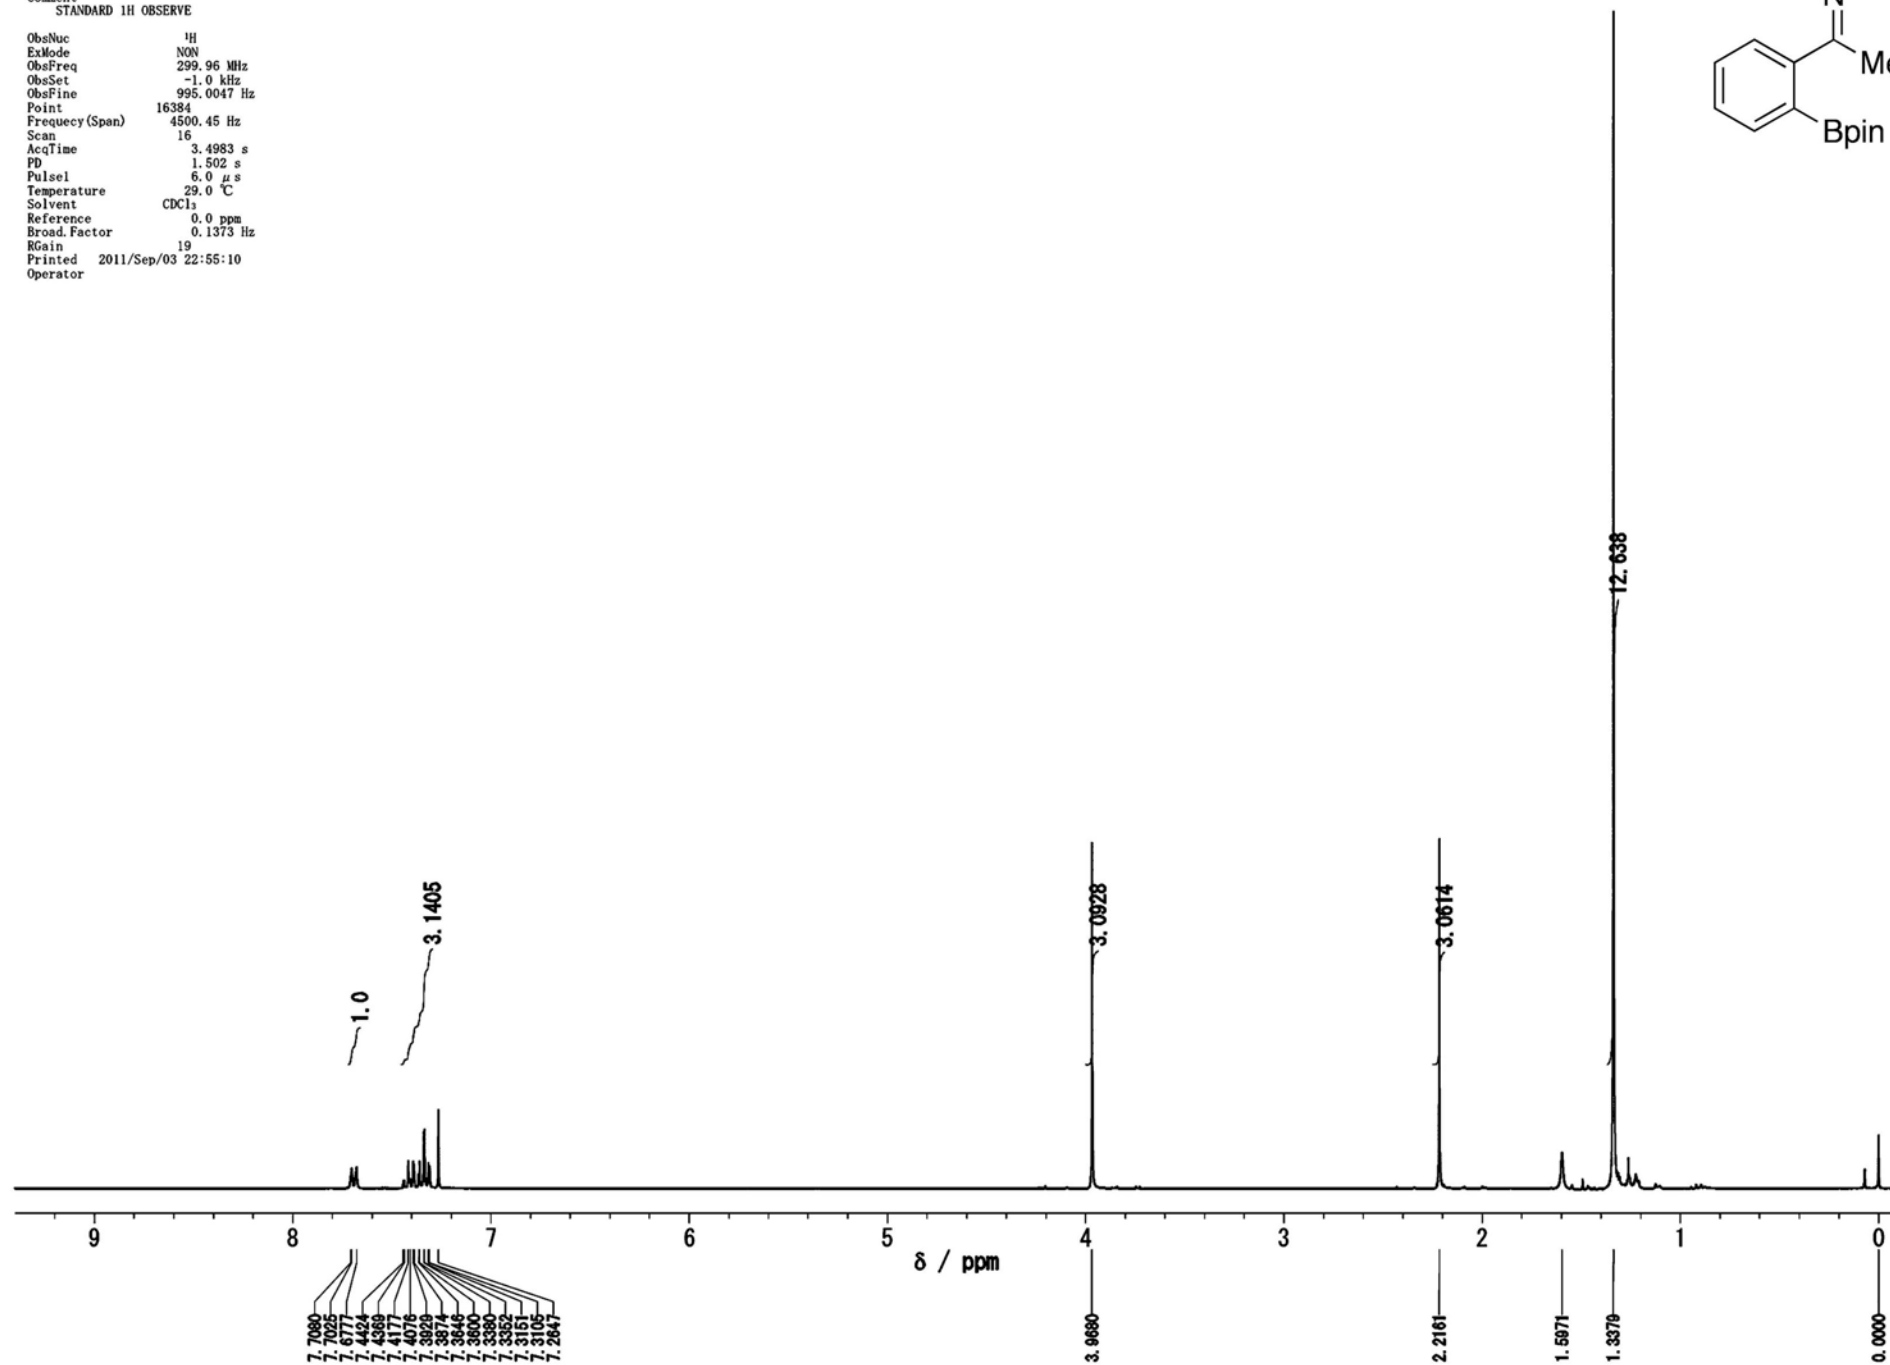

Original File:  
 Date Jun 15 11  
 Comment  
 C13 Statdard Observe  
 Stick=none Tune=6.4 Match=0.4

ObsNuc <sup>13</sup>C  
 ExMode NON  
 ObsFreq 75.43 MHz  
 ObsSet -1.0 kHz  
 ObsFine 996.3672 Hz  
 Point 32768  
 Frequency (Span) 18761.73 Hz  
 Scan 8000  
 AcqTime 1.4992 s  
 PD 1.501 s  
 Pulse 6.0  $\mu$ s  
 Temperature 29.0  $^{\circ}$ C  
 Solvent CDCl<sub>3</sub>  
 Reference 77.0 ppm  
 Broad Factor 0.2863 Hz  
 RGain 30  
 Printed 2011/Sep/03 22:56:34  
 Operator

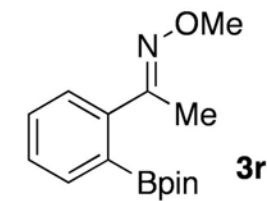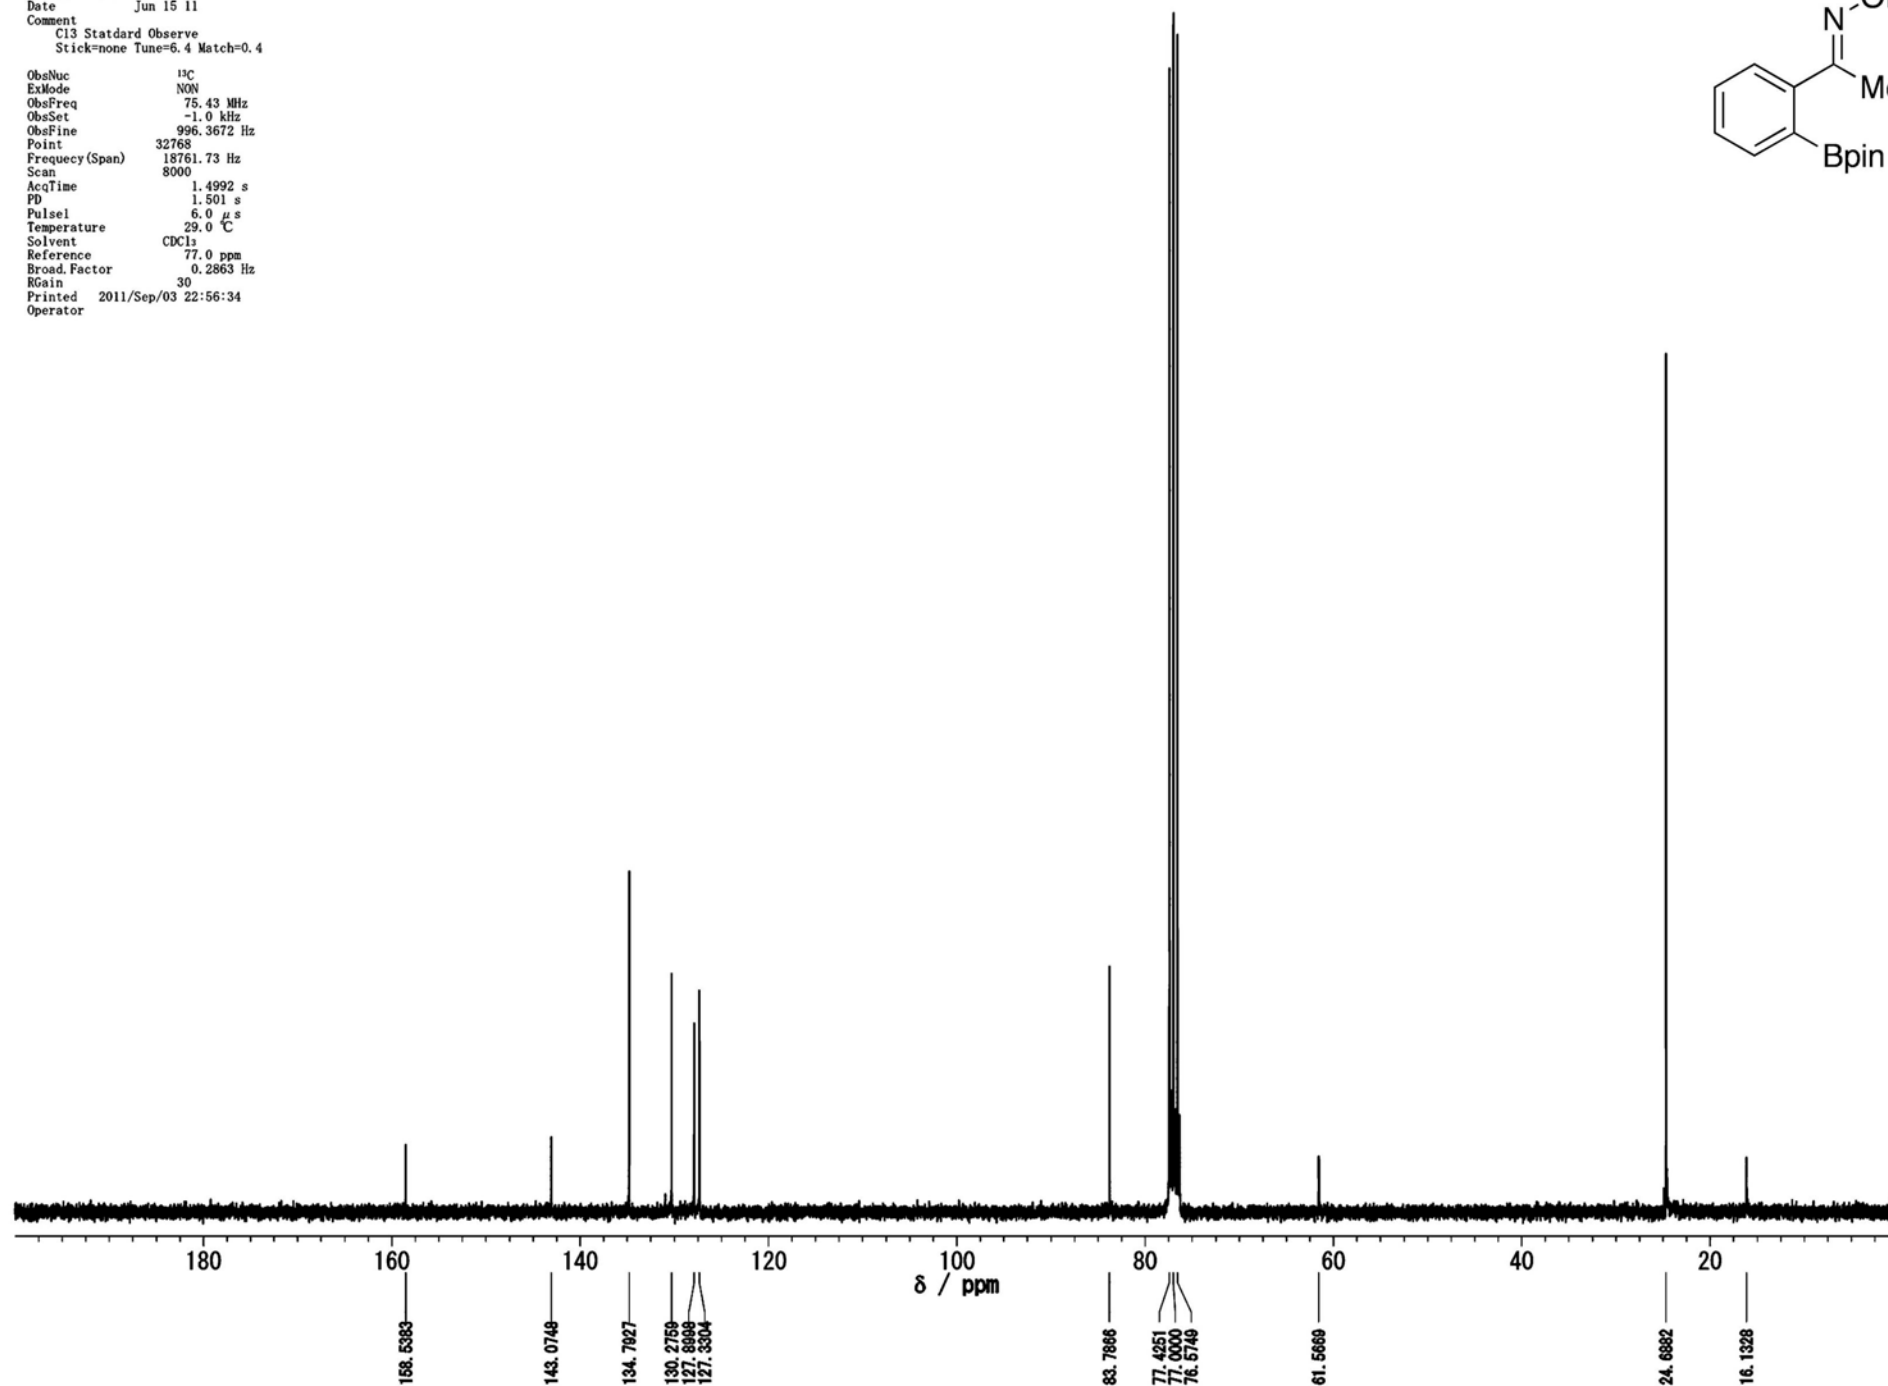

Original File: Jul 21 11  
 Date: Jul 21 11  
 Comment: STANDARD 1H OBSERVE  
 ObsNuc: <sup>1</sup>H  
 ExMode: NON  
 ObsFreq: 299.96 MHz  
 ObsSet: -1.0 kHz  
 ObsPine: 995.0047 Hz  
 Point: 16384  
 Frequency (Span): 4500.45 Hz  
 Scan: 16  
 AcqTime: 3.4983 s  
 PD: 1.502 s  
 Pulse: 6.0  $\mu$ s  
 Temperature: 29.0  $^{\circ}$ C  
 Solvent: CDCl<sub>3</sub>  
 Reference: 0.0 ppm  
 Broad. Factor: 0.1373 Hz  
 RGain: 26  
 Printed: 2011/Jul/28 15:41:39  
 Operator:

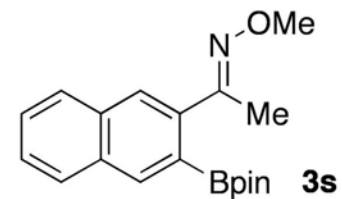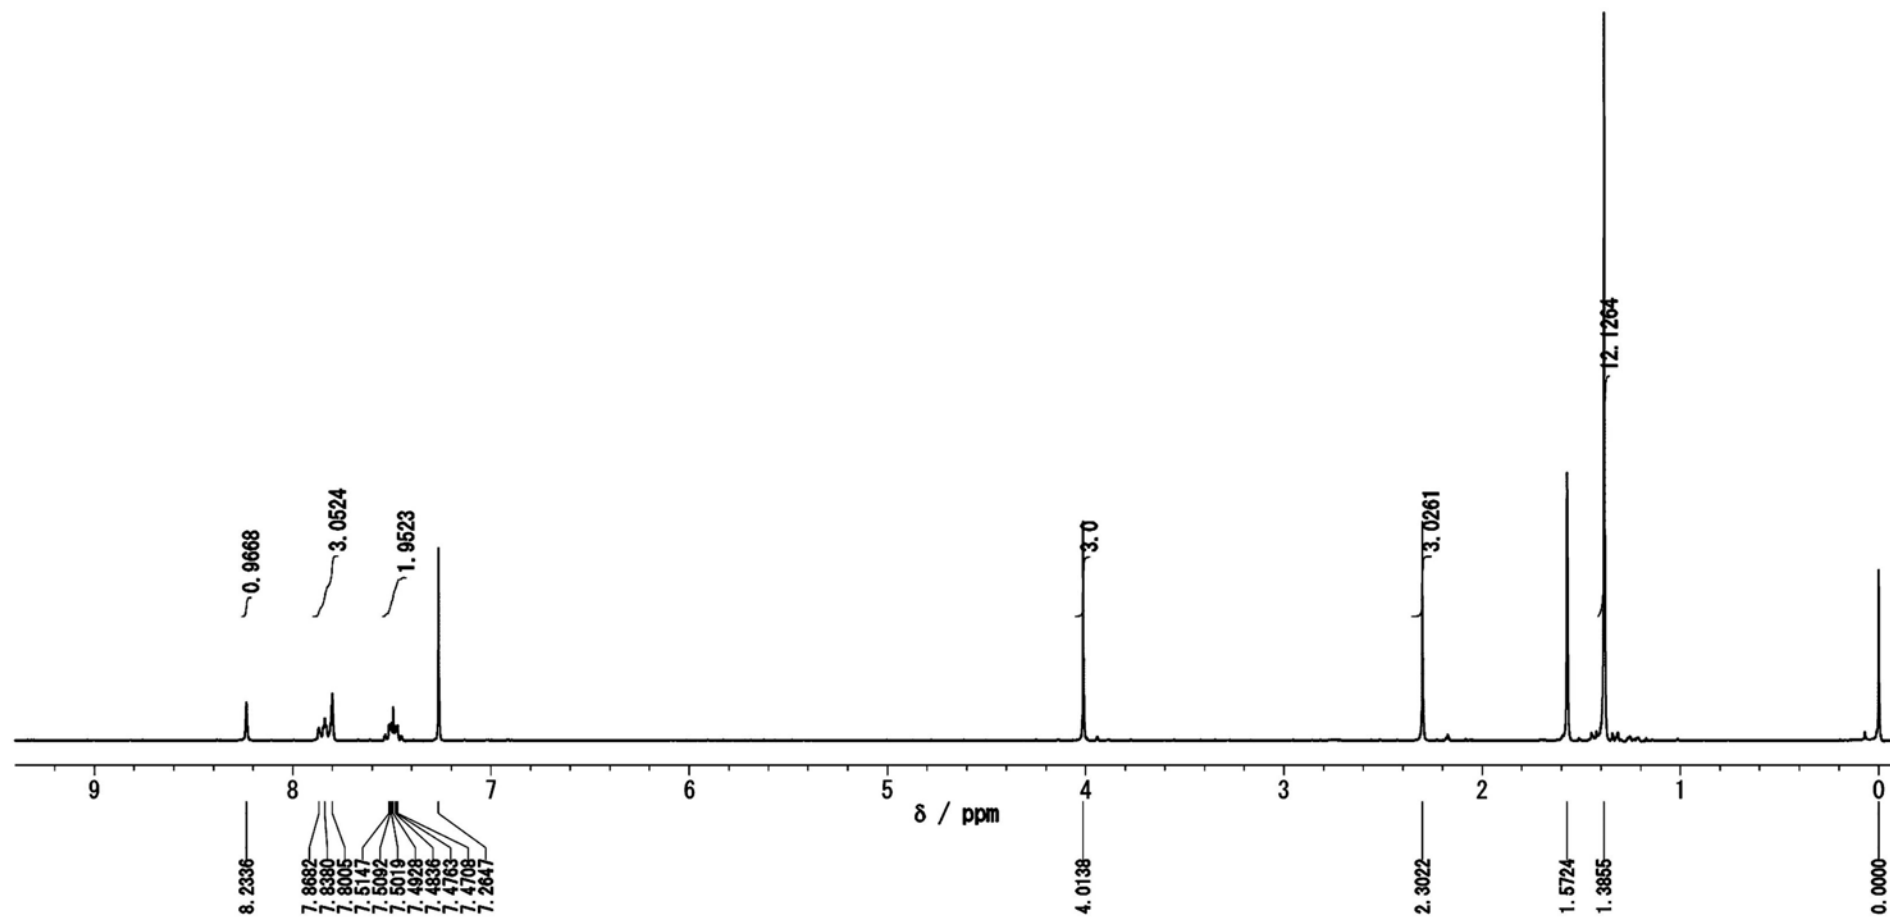

Original File:  
Date Jul 21 11  
Comment  
C13 Statdard Observe  
Stick=none Tune=6.4 Match=0.4

ObsNuc  $^{13}\text{C}$   
ExMode NON  
ObsFreq 75.43 MHz  
ObsSet -1.0 kHz  
ObsFine 996.3672 Hz  
Point 32768  
Frequency (Span) 18761.73 Hz  
Scan 10000  
AcqTime 1.4992 s  
PD 1.501 s  
Pulse 6.0  $\mu\text{s}$   
Temperature 29.0  $^{\circ}\text{C}$   
Solvent  $\text{CDCl}_3$   
Reference 77.0 ppm  
Broad Factor 0.2863 Hz  
RGain 30  
Printed 2011/Jul/28 15:43:12  
Operator

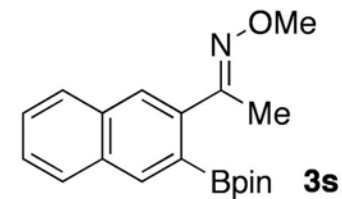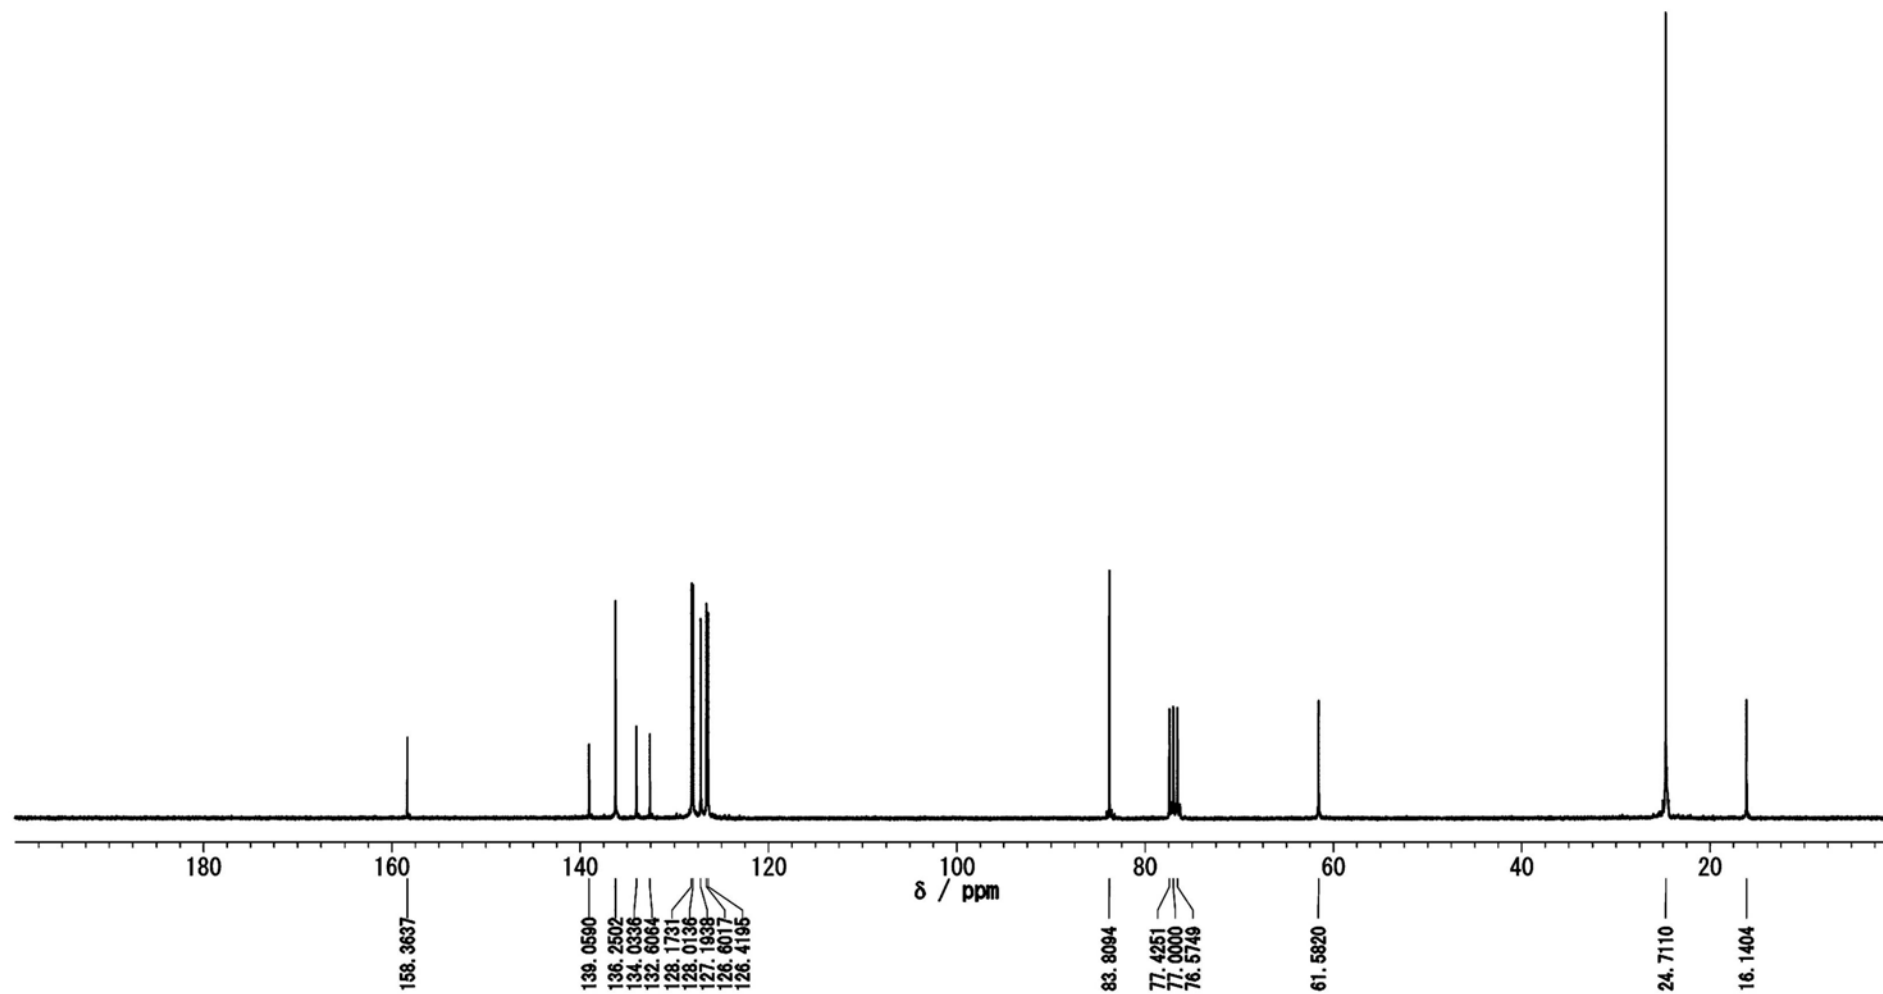

Original File:  
 Date Aug 3 11  
 Comment  
 STANDARD 1H OBSERVE

ObsNuc H  
 ExMode NON  
 ObsFreq 299.96 MHz  
 ObsSet -1.0 kHz  
 ObsPine 995.0047 Hz  
 Point 16384  
 Frequency (Span) 4500.45 Hz  
 Scan 16  
 AcqTime 3.4983 s  
 PD 1.502 s  
 Pulse 6.0  $\mu$ s  
 Temperature 29.0  $^{\circ}$ C  
 Solvent CDCl<sub>3</sub>  
 Reference 0.0 ppm  
 Broad Factor 0.1373 Hz  
 RGain 5  
 Printed 2011/Sep/03 22:57:46  
 Operator

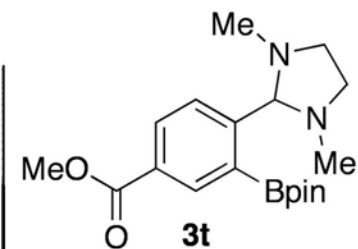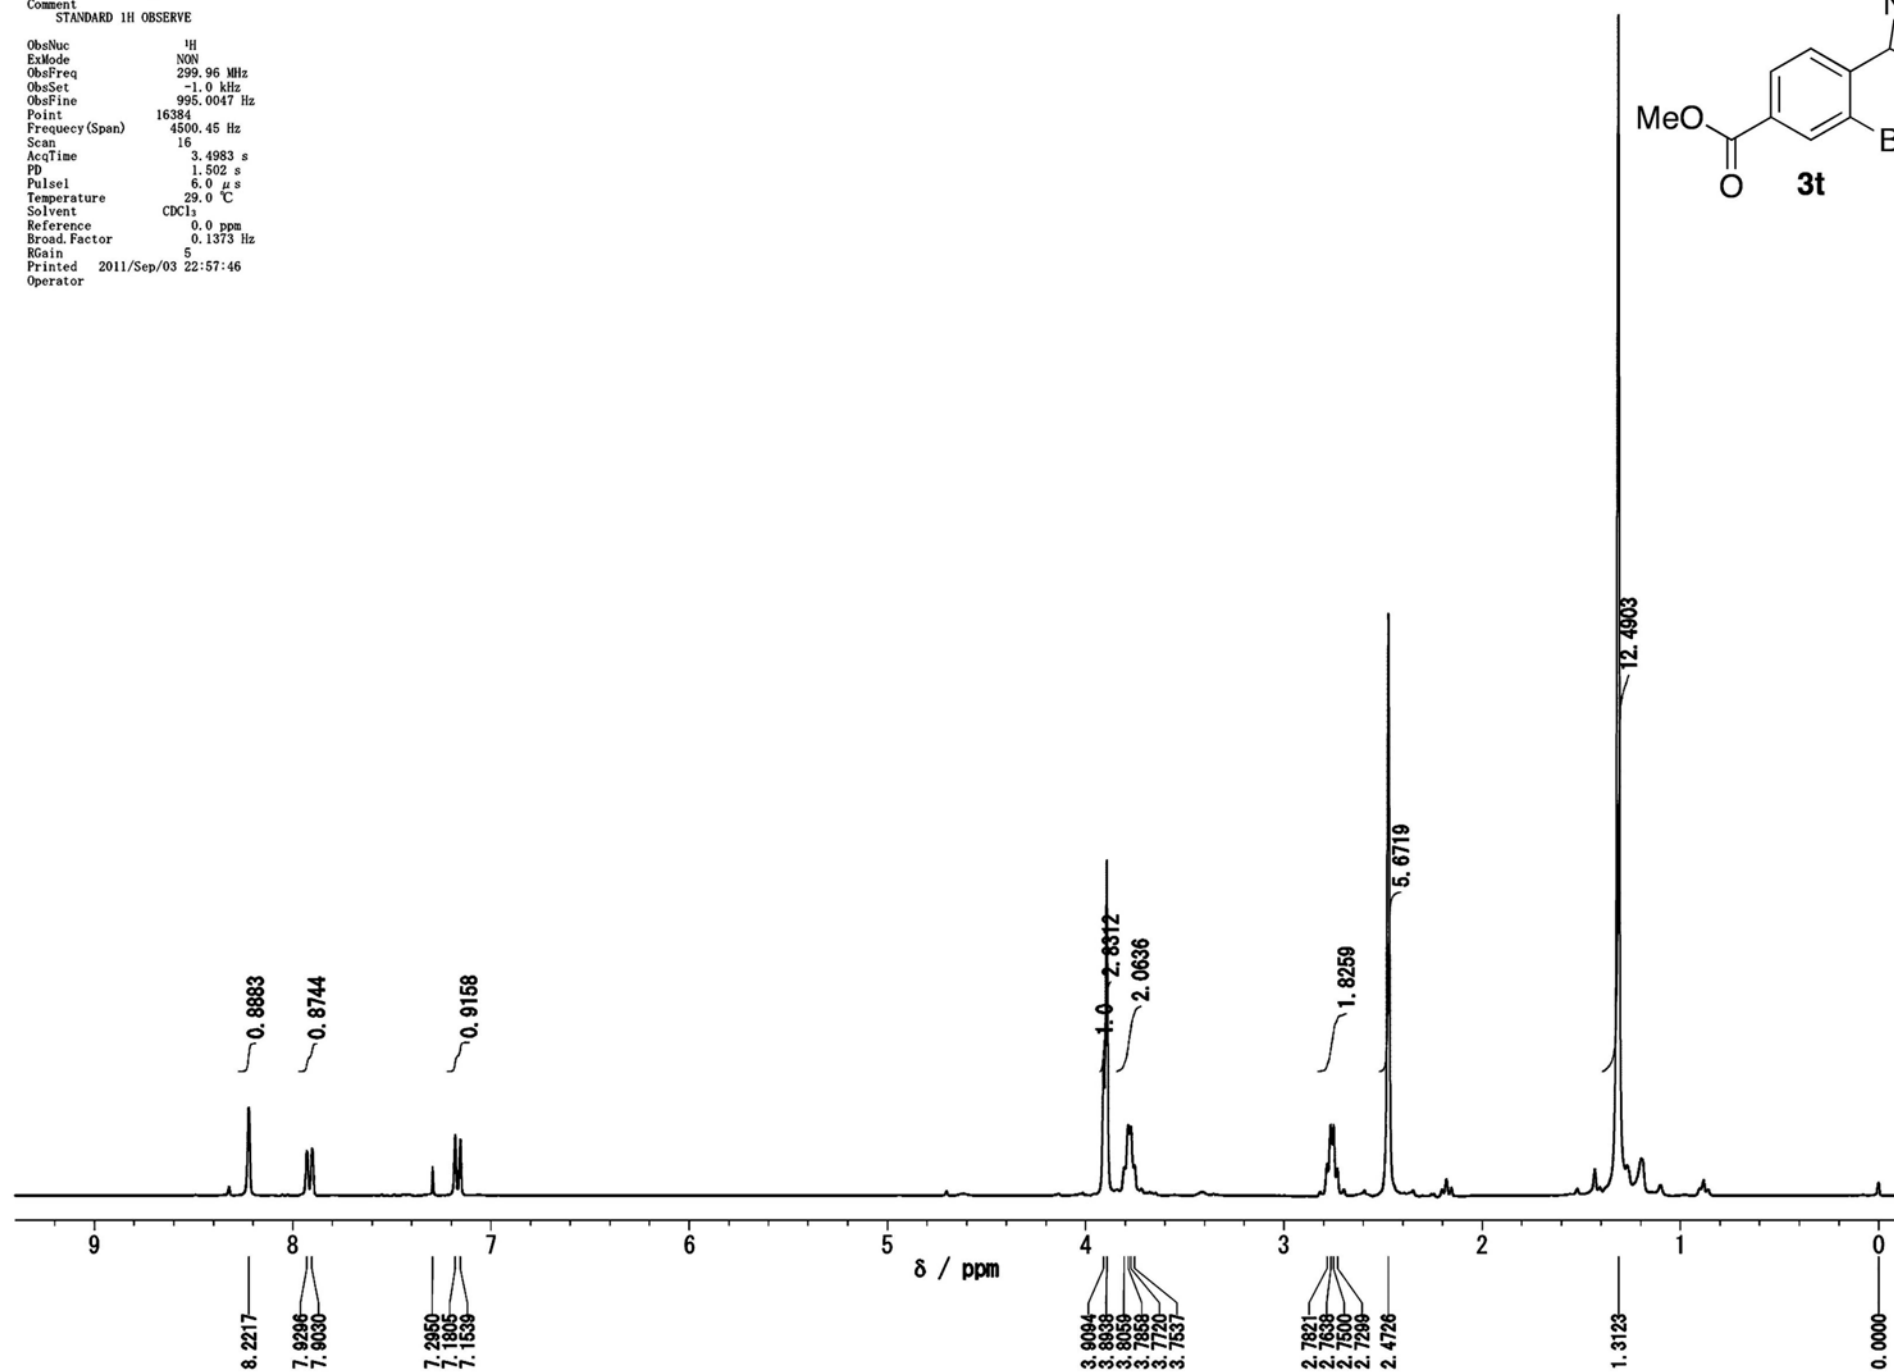

Original File:  
 Date Aug 3 11  
 Comment  
 C13 Statdard Observe  
 Stick=none Tune=6.4 Match=0.4

ObsNuc  $^{13}\text{C}$   
 ExMode NON  
 ObsFreq 75.43 MHz  
 ObsSet -1.0 kHz  
 ObsFine 996.3672 Hz  
 Point 32768  
 Frequency (Span) 18761.73 Hz  
 Scan 112  
 AcqTime 1.4992 s  
 PD 1.501 s  
 Pulsel 6.0  $\mu\text{s}$   
 Temperature 29.0  $^{\circ}\text{C}$   
 Solvent  $\text{CDCl}_3$   
 Reference 77.0 ppm  
 Broad Factor 0.2863 Hz  
 RGain 30  
 Printed 2011/Sep/03 22:58:48  
 Operator

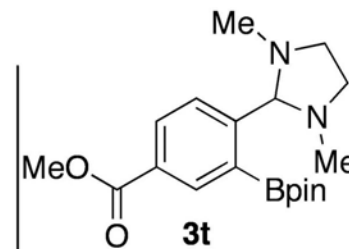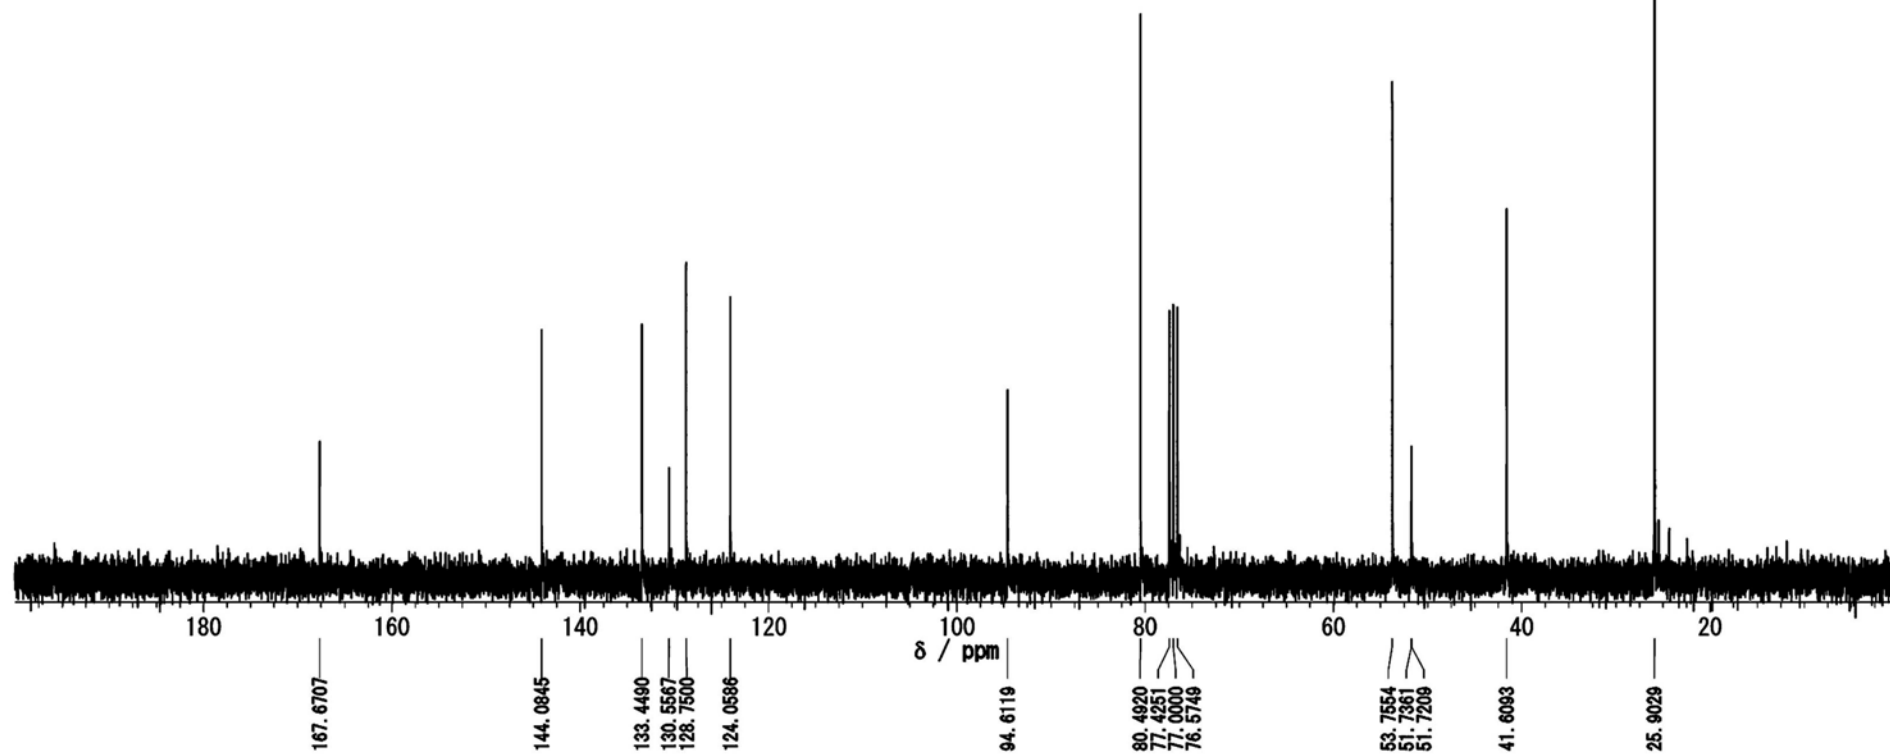

Original File:  
 Date Aug 3 11  
 Comment  
 STANDARD 1H OBSERVE

ObsNuc <sup>1</sup>H  
 ExMode NON  
 ObsFreq 299.96 MHz  
 ObsSet -1.0 kHz  
 ObsPine 995.0047 Hz  
 Point 16384  
 Frequency (Span) 4500.45 Hz  
 Scan 16  
 AcqTime 3.4983 s  
 PD 1.502 s  
 Pulse 6.0  $\mu$ s  
 Temperature 29.0  $^{\circ}$ C  
 Solvent CDCl<sub>3</sub>  
 Reference 0.0 ppm  
 Broad Factor 0.1373 Hz  
 RGain 30  
 Printed 2011/Sep/03 22:59:54  
 Operator

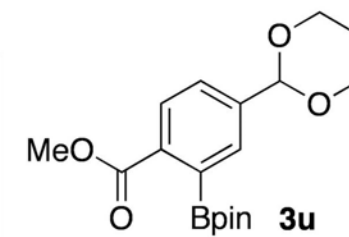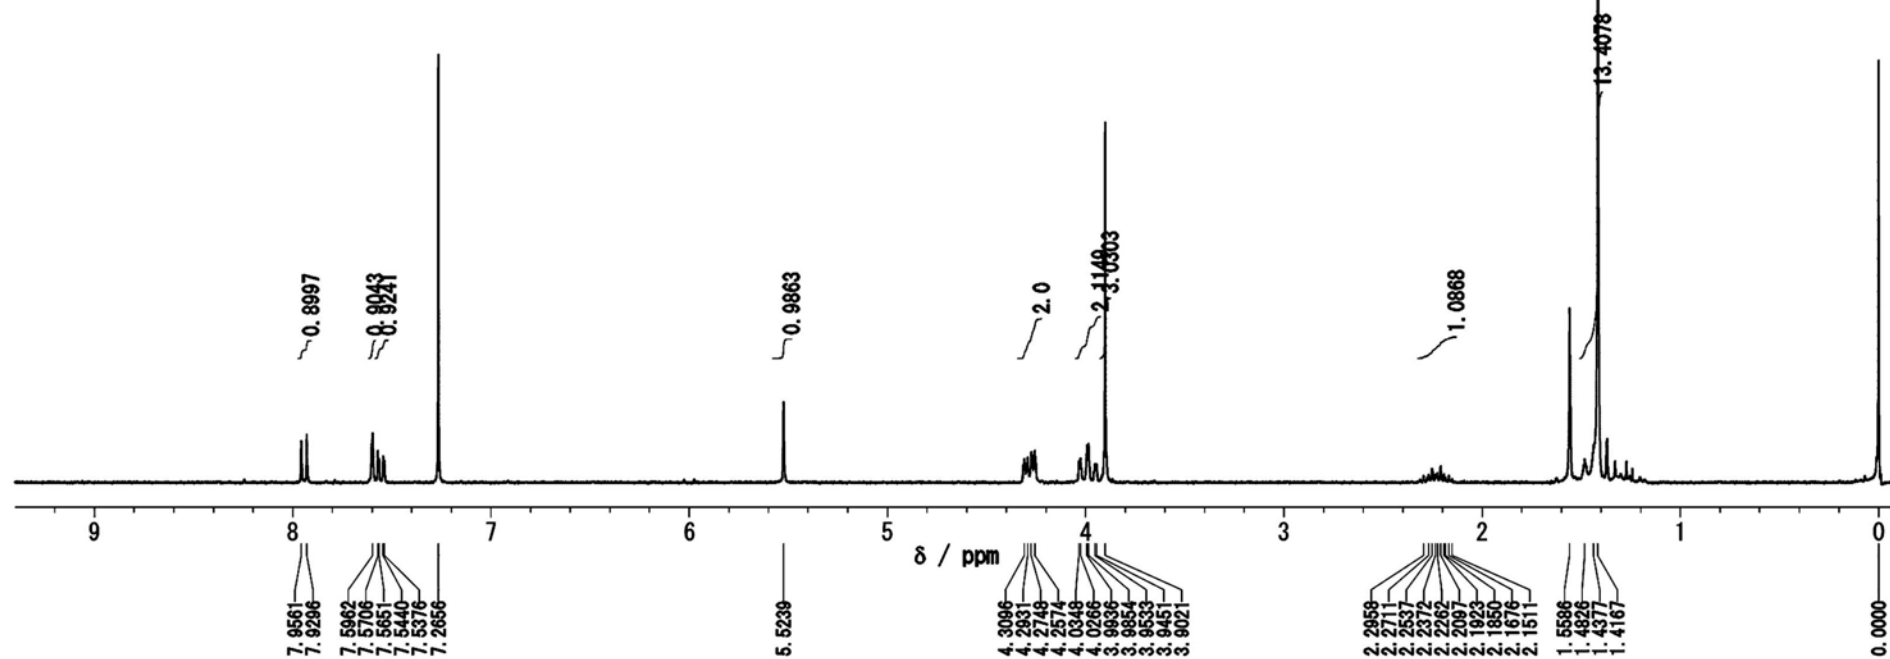

Original File:  
 Date Aug 4 11  
 Comment  
 C13 Statdard Observe  
 Stick=none Tune=6.4 Match=0.4

ObsNuc  $^{13}\text{C}$   
 ExMode NON  
 ObsFreq 75.43 MHz  
 ObsSet -1.0 kHz  
 ObsFine 996.3672 Hz  
 Point 32768  
 Frequency (Span) 18761.73 Hz  
 Scan 8000  
 AcqTime 1.4992 s  
 PD 1.501 s  
 Pulsel 6.0  $\mu\text{s}$   
 Temperature 29.0  $^{\circ}\text{C}$   
 Solvent  $\text{CDCl}_3$   
 Reference 77.0 ppm  
 Broad.Factor 0.2863 Hz  
 RGain 30  
 Printed 2011/Sep/03 23:01:09  
 Operator

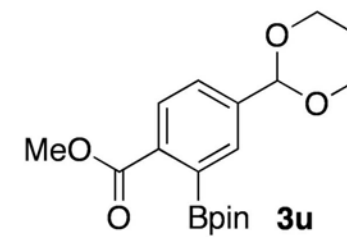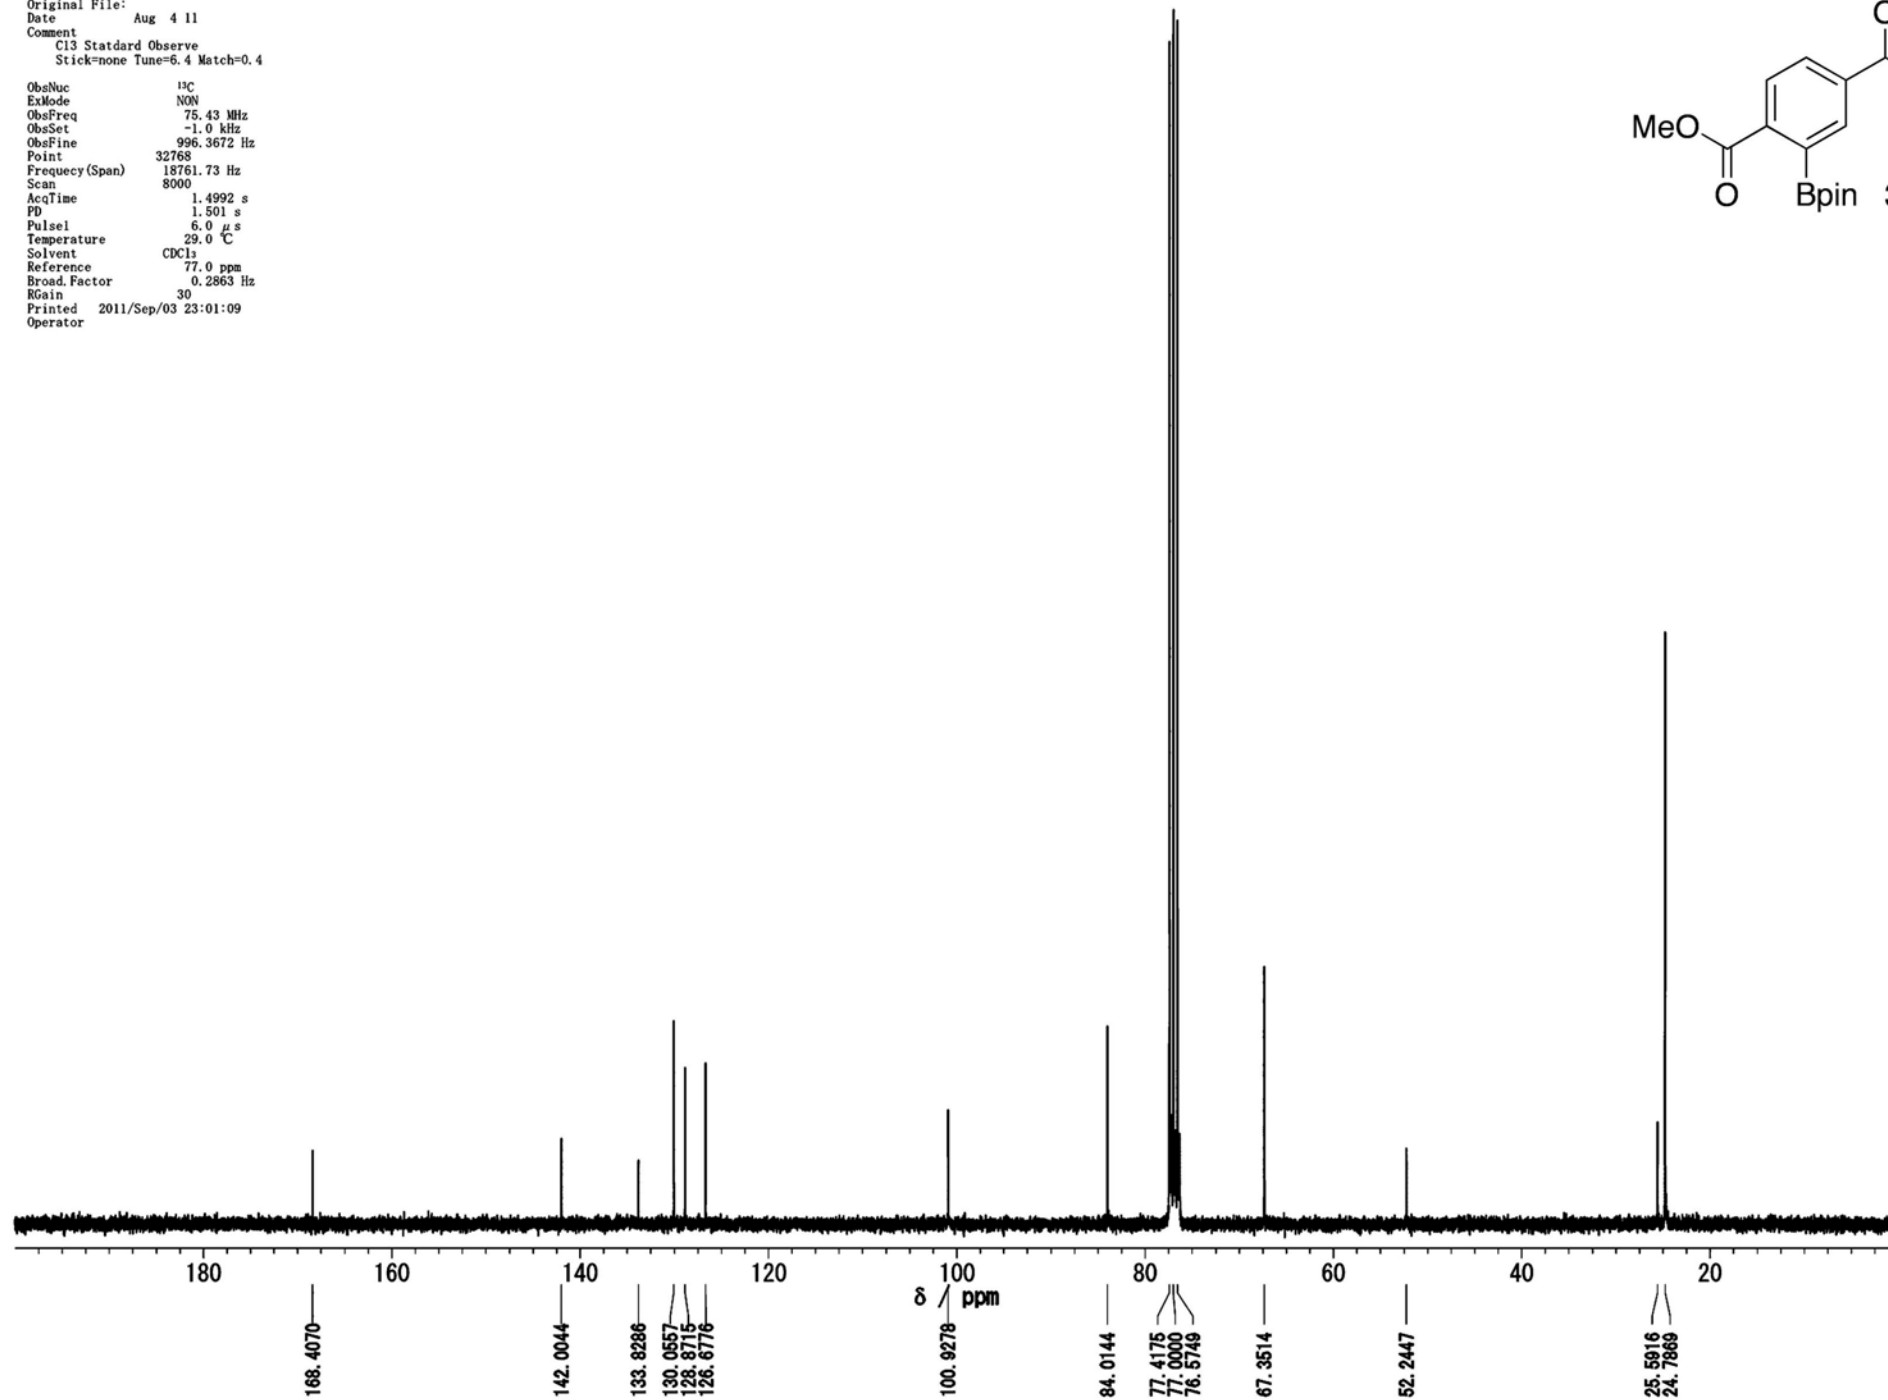



Original File:  
 Date Aug 5 11  
 Comment  
 STANDARD 1H OBSERVE

ObsNuc <sup>1</sup>H  
 ExMode NON  
 ObsFreq 299.96 MHz  
 ObsSet -1.0 kHz  
 ObsPine 995.0047 Hz  
 Point 16384  
 Frequency (Span) 4500.45 Hz  
 Scan 16  
 AcqTime 3.4983 s  
 PD 1.502 s  
 Pulse 6.0  $\mu$ s  
 Temperature 29.0  $^{\circ}$ C  
 Solvent CDCl<sub>3</sub>  
 Reference 0.0 ppm  
 Broad. Factor 0.1373 Hz  
 RGain 19  
 Printed 2011/Sep/03 23:02:08  
 Operator

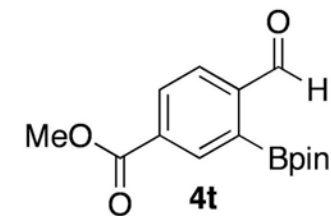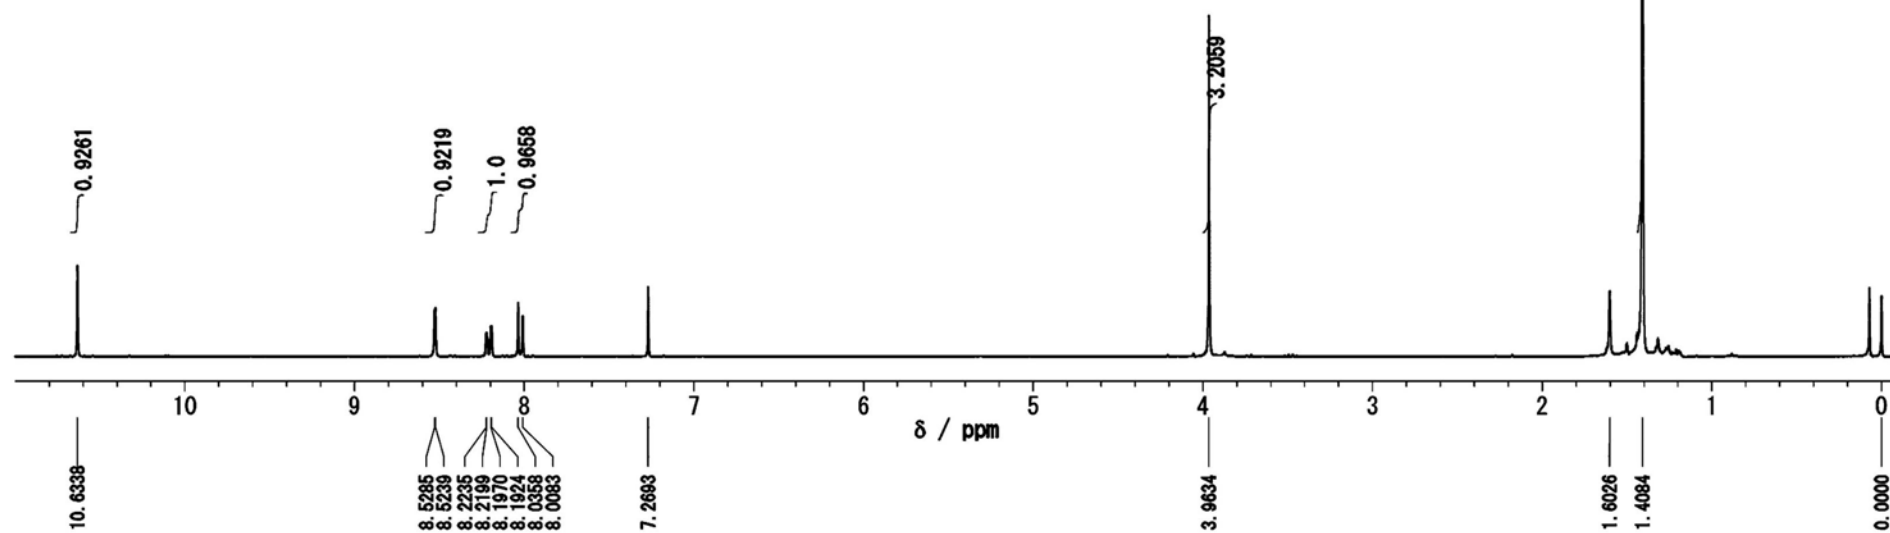

Original File:  
 Date Aug 6 11  
 Comment  
 C13 Statdard Observe  
 Stick=none Tune=6.4 Match=0.4

ObsNuc <sup>13</sup>C  
 ExMode NON  
 ObsFreq 75.43 MHz  
 ObsSet -1.0 kHz  
 ObsFine 996.3672 Hz  
 Point 32768  
 Frequency (Span) 18761.73 Hz  
 Scan 8000  
 AcqTime 1.4992 s  
 PD 1.501 s  
 Pulsel 6.0  $\mu$ s  
 Temperature 29.0  $^{\circ}$ C  
 Solvent CDCl<sub>3</sub>  
 Reference 77.0 ppm  
 Broad.Factor 0.2863 Hz  
 RGain 30  
 Printed 2011/Sep/03 23:03:01  
 Operator

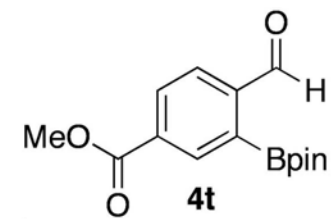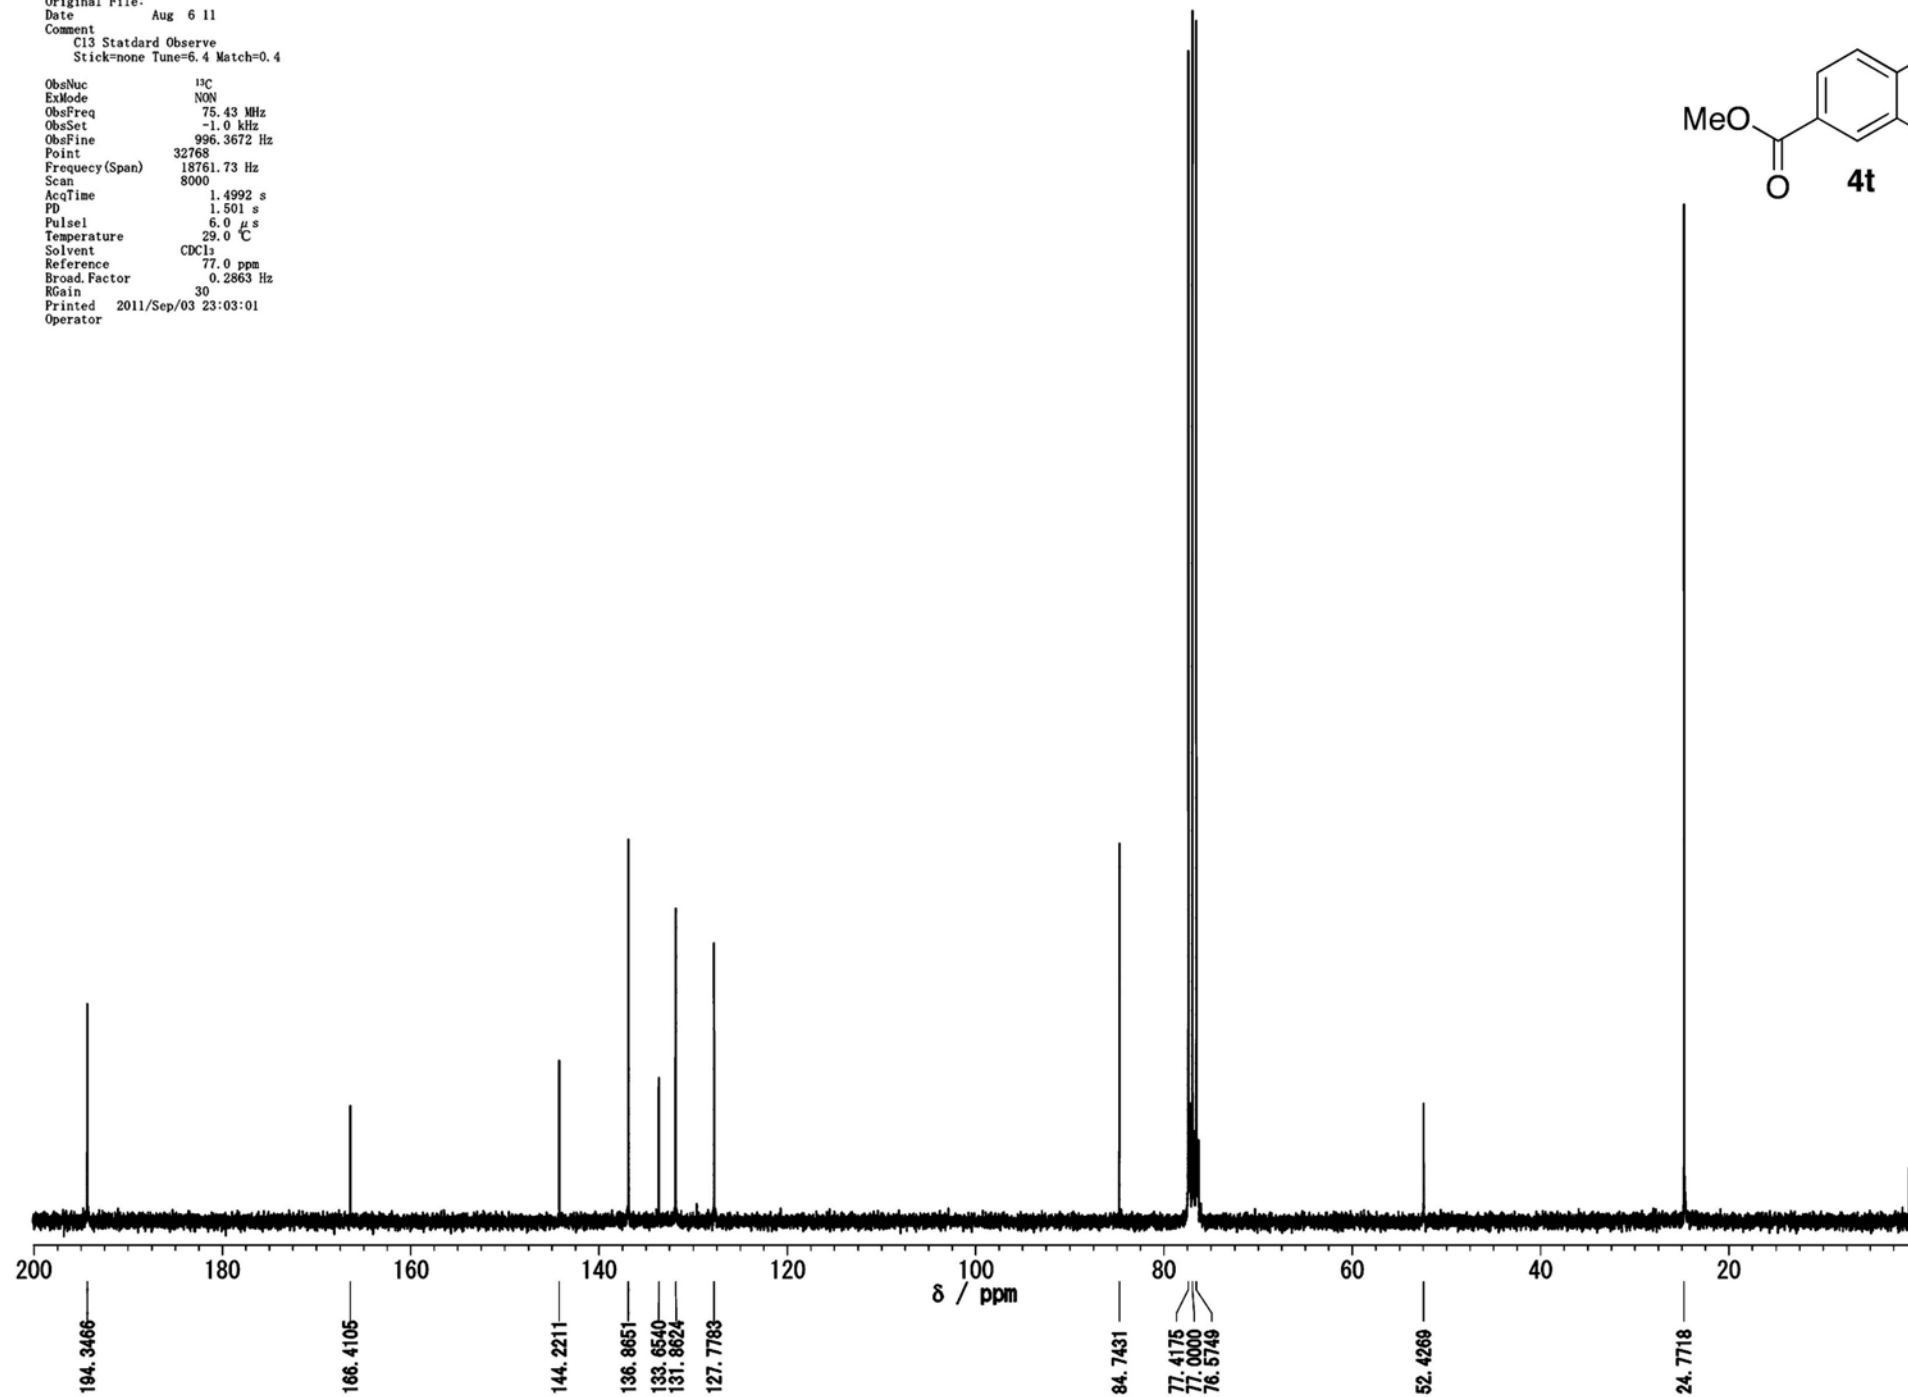

Original File:  
 Date Sep 1 11  
 Comment  
 STANDARD 1H OBSERVE

ObsNuc <sup>1</sup>H  
 ExMode NON  
 ObsFreq 299.96 MHz  
 ObsSet -1.0 kHz  
 ObsPine 995.0047 Hz  
 Point 16384  
 Frequency (Span) 4500.45 Hz  
 Scan 16  
 AcqTime 3.4983 s  
 PD 1.502 s  
 Pulse 6.0  $\mu$ s  
 Temperature 29.0  $^{\circ}$ C  
 Solvent CDCl<sub>3</sub>  
 Reference 0.0 ppm  
 Broad. Factor 0.1373 Hz  
 RGain 24  
 Printed 2011/Sep/03 23:03:56  
 Operator

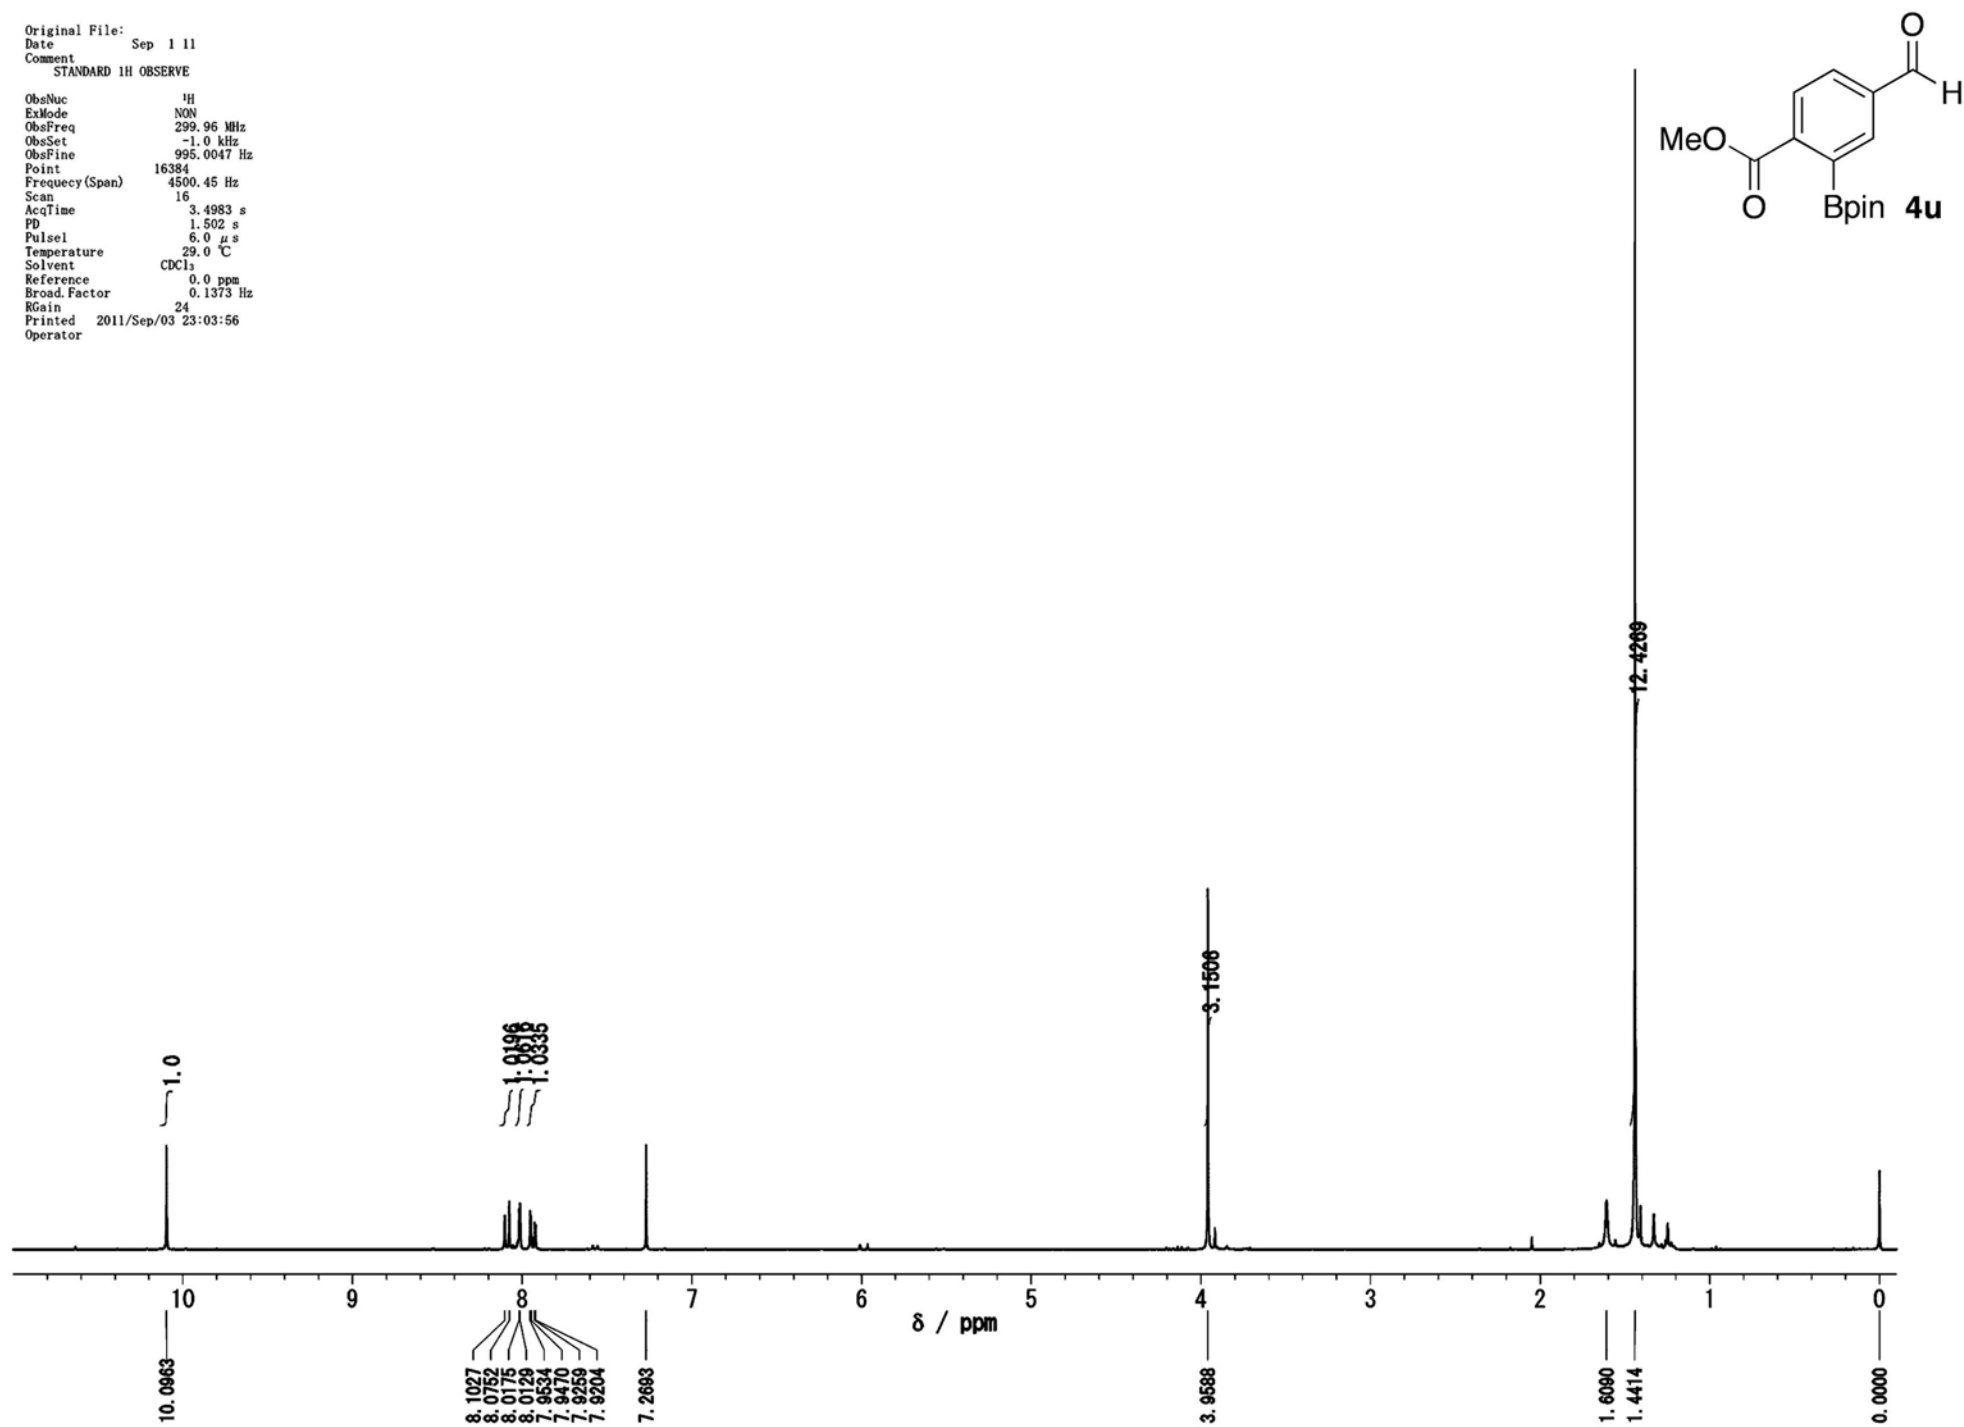

Original File:  
 Date Sep 3 11  
 Comment  
 C13 Statdard Observe  
 Stick=none Tune=6.4 Match=0.4

ObsNuc <sup>13</sup>C  
 ExMode NON  
 ObsFreq 75.43 MHz  
 ObsSet -1.0 kHz  
 ObsFine 996.3672 Hz  
 Point 32768  
 Frequency (Span) 18761.73 Hz  
 Scan 2784  
 AcqTime 1.4992 s  
 PD 1.501 s  
 Pulsel 6.0  $\mu$ s  
 Temperature 29.0  $^{\circ}$ C  
 Solvent CDCl<sub>3</sub>  
 Reference 77.0 ppm  
 Broad.Factor 0.2863 Hz  
 RGain 30  
 Printed 2011/Sep/03 23:04:45  
 Operator

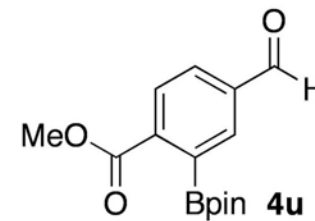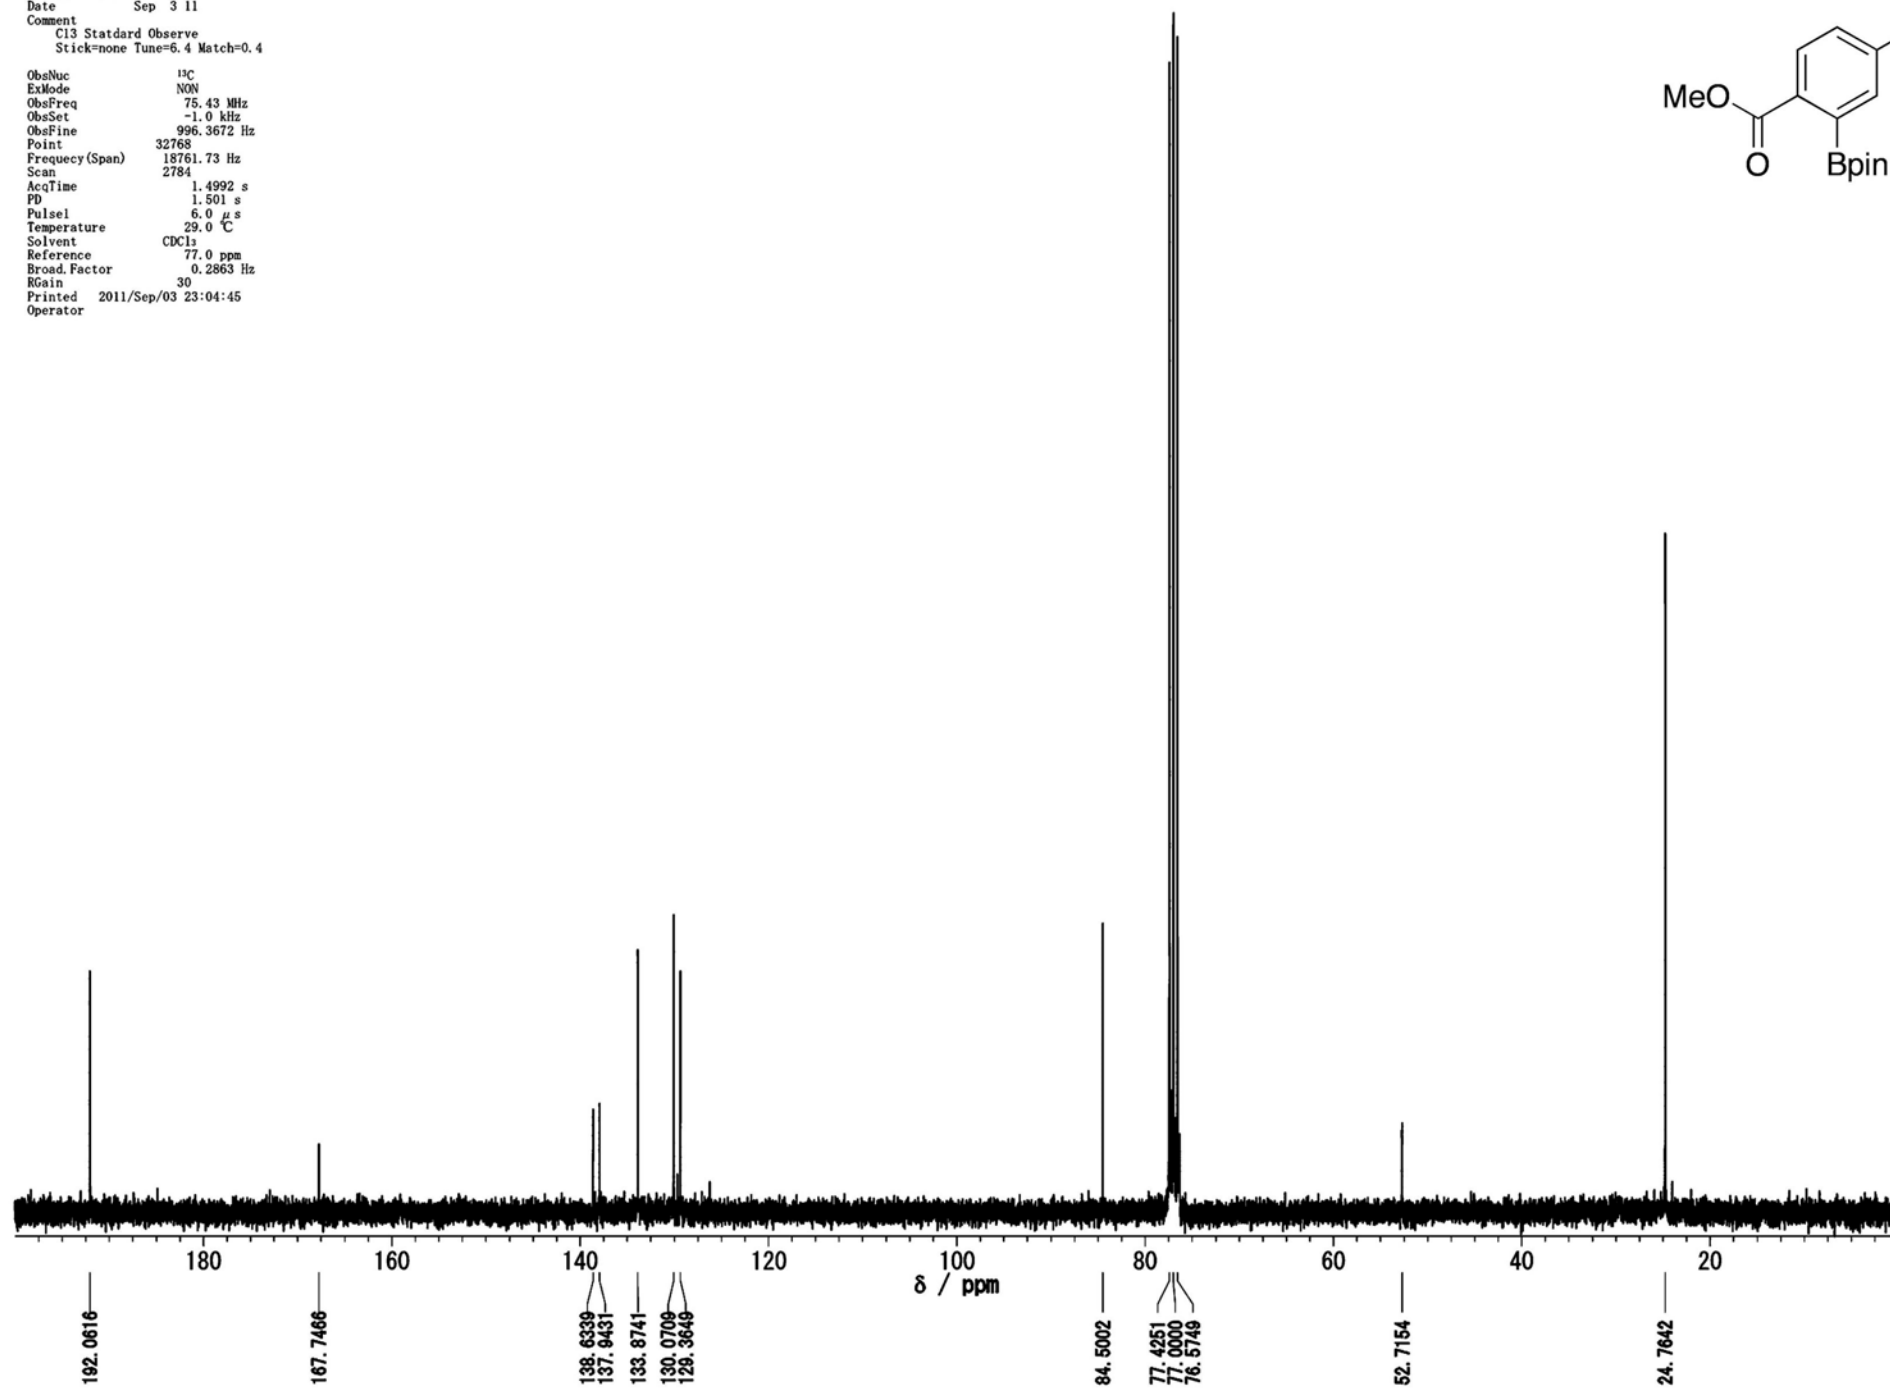

Original File:  
Date Aug 25 11  
Comment  
STANDARD 1H OBSERVE

ObsNuc H  
ExMode NON  
ObsFreq 299.96 MHz  
ObsSet -1.0 kHz  
ObsFine 995.0047 Hz  
Point 16384  
Frequency (Span) 4500.45 Hz  
Scan 16  
AcqTime 3.4983 s  
PD 1.502 s  
Pulse 6.0  $\mu$ s  
Temperature 29.0  $^{\circ}$ C  
Solvent CDCl<sub>3</sub>  
Reference 0.0 ppm  
Broad Factor 0.1373 Hz  
RGain 30  
Printed 2011/Sep/01 20:51:19  
Operator

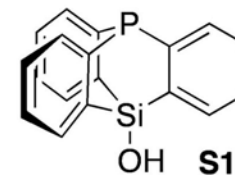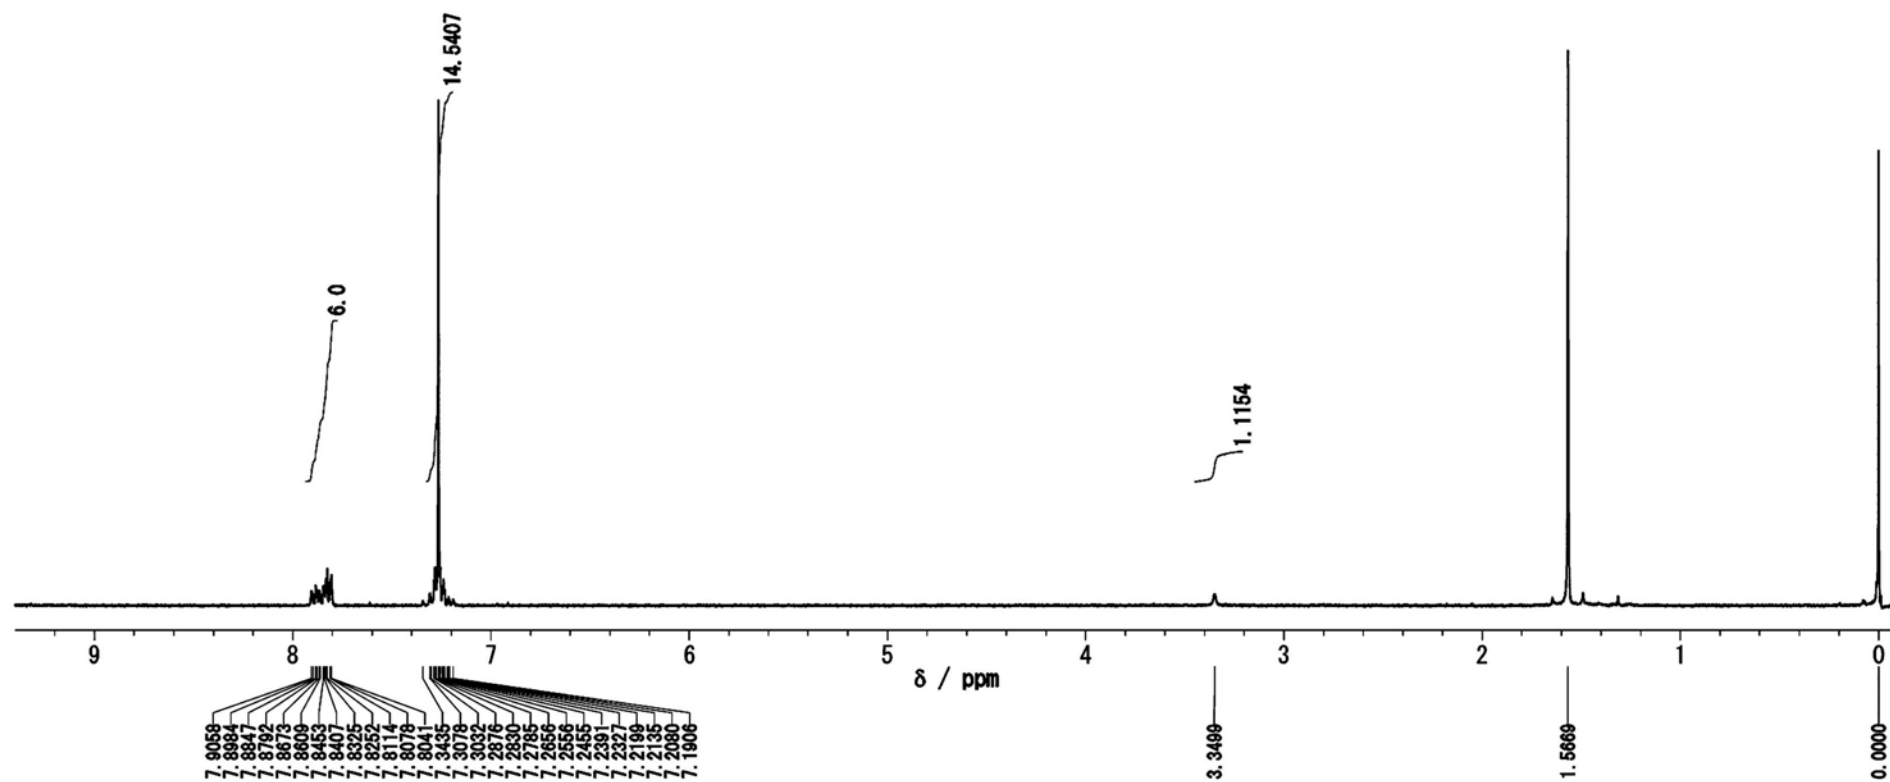

Original File:  
 Date Aug 30 10  
 Comment  
 C13 Statdard Observe  
 Stick=none Tune=6.4 Match=0.4

ObsNuc  $^{13}\text{C}$   
 ExMode NON  
 ObsFreq 75.43 MHz  
 ObsSet -1.0 kHz  
 ObsFine 996.3672 Hz  
 Point 32768  
 Frequency (Span) 18761.73 Hz  
 Scan 256  
 AcqTime 1.4992 s  
 PD 1.501 s  
 Pulse 6.0  $\mu\text{s}$   
 Temperature 29.0  $^{\circ}\text{C}$   
 Solvent  $\text{CDCl}_3$   
 Reference 77.0 ppm  
 Broad Factor 0.2863 Hz  
 RGain 30  
 Printed 2011/Sep/01 20:45:59  
 Operator

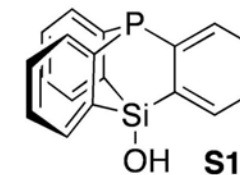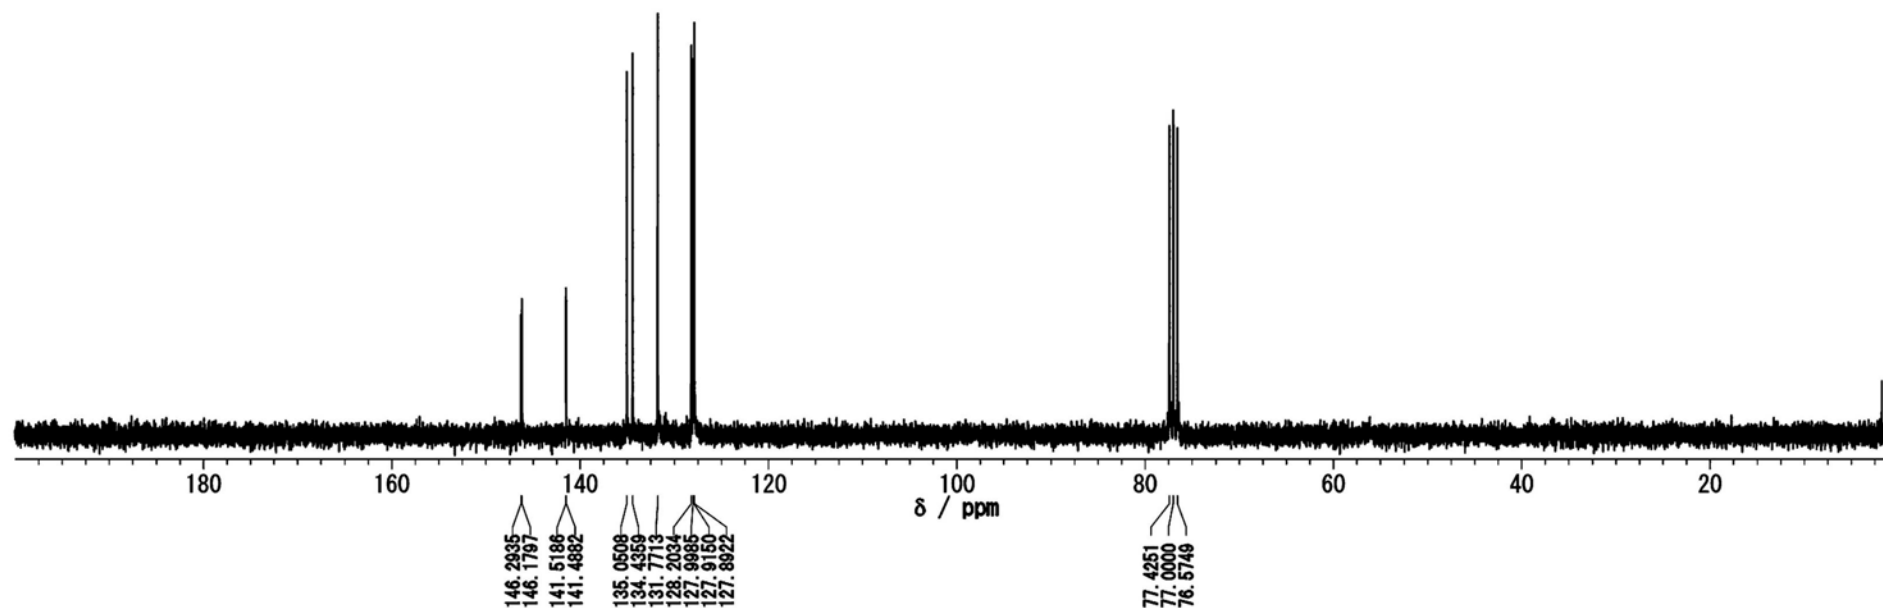

Original File:  
Date Dec 17 10  
Comment  
P-31 STANDARD PARAMETERS  
PHOSPHATE REGION

ObsNuc <sup>31</sup>P  
ExMode NON  
ObsFreq 121.42 MHz  
ObsSet 0.0 kHz  
ObsFine 0.7799 Hz  
Point 65536  
Frequency (Span) 50000.0 Hz  
Scan 64  
AcqTime 1.28 s  
PD 1.4 s  
Pulse 6.8  $\mu$ s  
Temperature 29.0  $^{\circ}$ C  
Solvent CDCl<sub>3</sub>  
Reference 0.0 ppm  
Broad Factor 0.3815 Hz  
RGain 30  
Printed 2011/Sep/05 12:02:19  
Operator

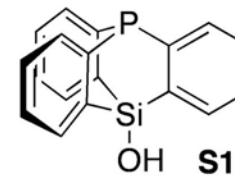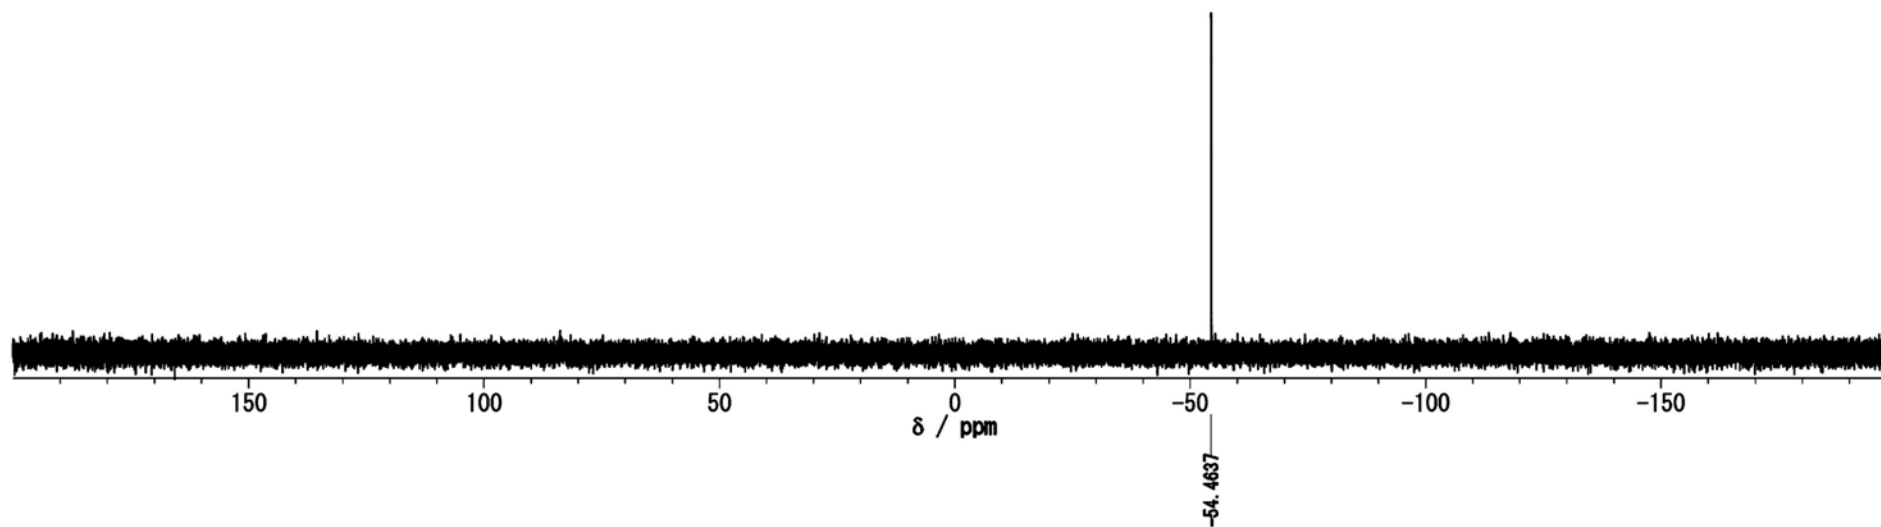

Original File:  
Date May 27 11  
Comment  
STANDARD 1H OBSERVE

ObsNuc <sup>1</sup>H  
ExMode NON  
ObsFreq 299.96 MHz  
ObsSet -1.0 kHz  
ObsFine 995.0047 Hz  
Point 16384  
Frequency (Span) 4500.45 Hz  
Scan 16  
AcqTime 3.4983 s  
PD 1.502 s  
Pulse1 6.0  $\mu$ s  
Temperature 29.0  $^{\circ}$ C  
Solvent CDCl<sub>3</sub>  
Reference 0.0 ppm  
Broad Factor 0.1373 Hz  
RGain 24  
Printed 2011/Sep/01 20:53:24  
Operator

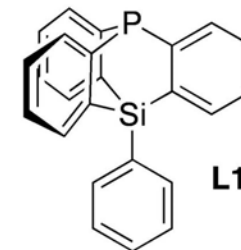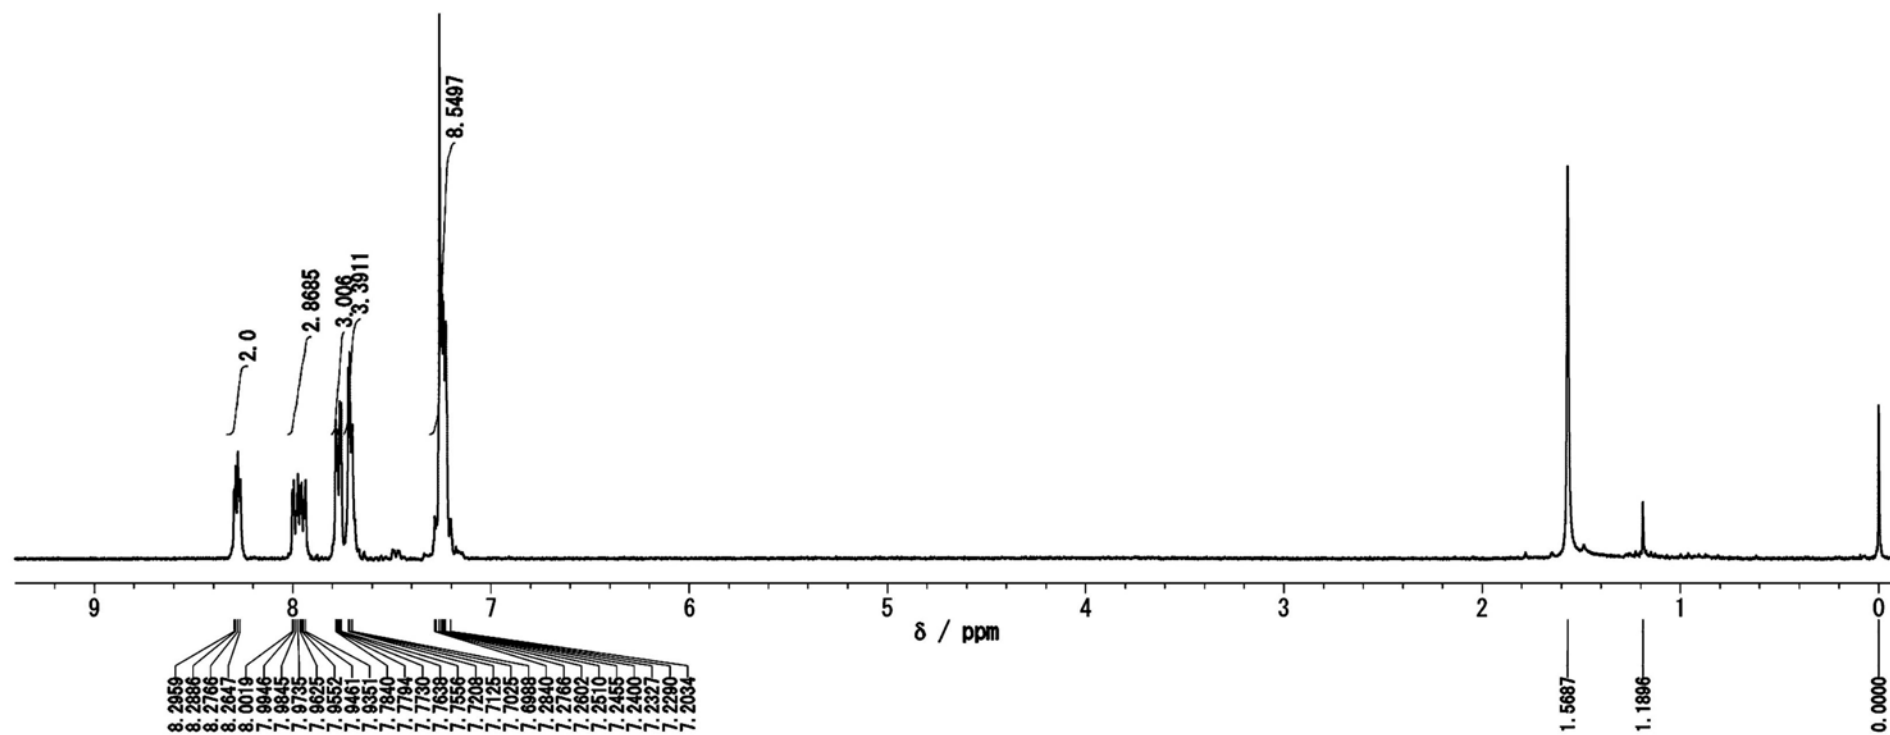



Original File:  
 Date Aug 23 11  
 Comment  
 C13 Statdard Observe  
 Stick=none Tune=6.4 Match=0.4

ObsNuc <sup>13</sup>C  
 ExMode NON  
 ObsFreq 75.43 MHz  
 ObsSet -1.0 kHz  
 ObsFine 996.3672 Hz  
 Point 32768  
 Frequency (Span) 18761.73 Hz  
 Scan 10128  
 AcqTime 1.4992 s  
 PD 1.501 s  
 Pulsel 6.0  $\mu$ s  
 Temperature 29.0  $^{\circ}$ C  
 Solvent CDCl<sub>3</sub>  
 Reference 77.0 ppm  
 Broad.Factor 0.2863 Hz  
 RGain 30  
 Printed 2011/Sep/01 20:43:15  
 Operator

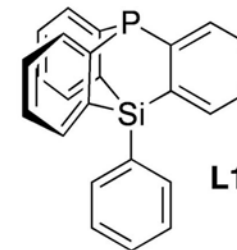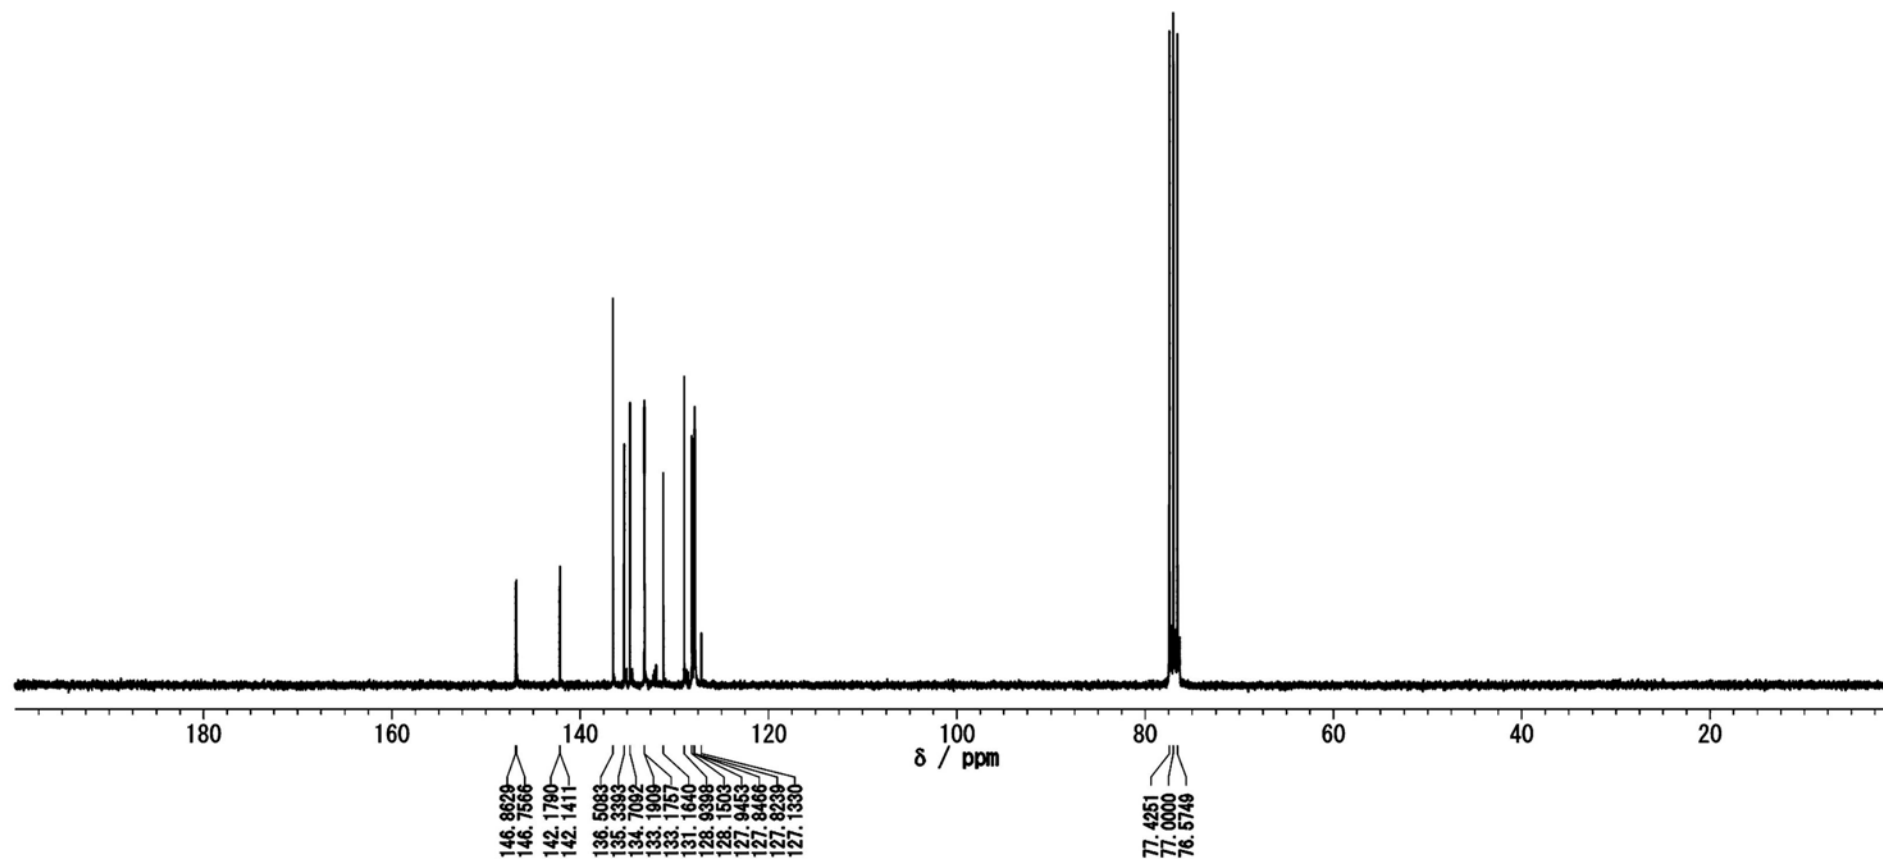

Date May 27 11  
 Comment P-31 STANDARD PARAMETERS  
 PHOSPHATE REGION  
 ObsNuc <sup>31</sup>P  
 ExMode  
 ObsFreq 121.42 MHz  
 ObsSet 0.0 kHz  
 ObsFine 0.7799 Hz  
 Point 65536  
 Frequency (Span) 50000.0 Hz  
 Scan 64  
 AcqTime 1.28 s  
 PD 1.4 s  
 Pulse1 6.8  $\mu$ s  
 Temperature 29.0  $^{\circ}$ C  
 Solvent CDCl<sub>3</sub>  
 Reference 0.0 ppm  
 Broad. Factor 0.25 Hz  
 RGain 30  
 Printed 2011/Sep/05 12:04:18  
 Operator

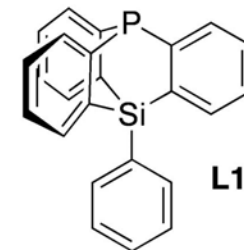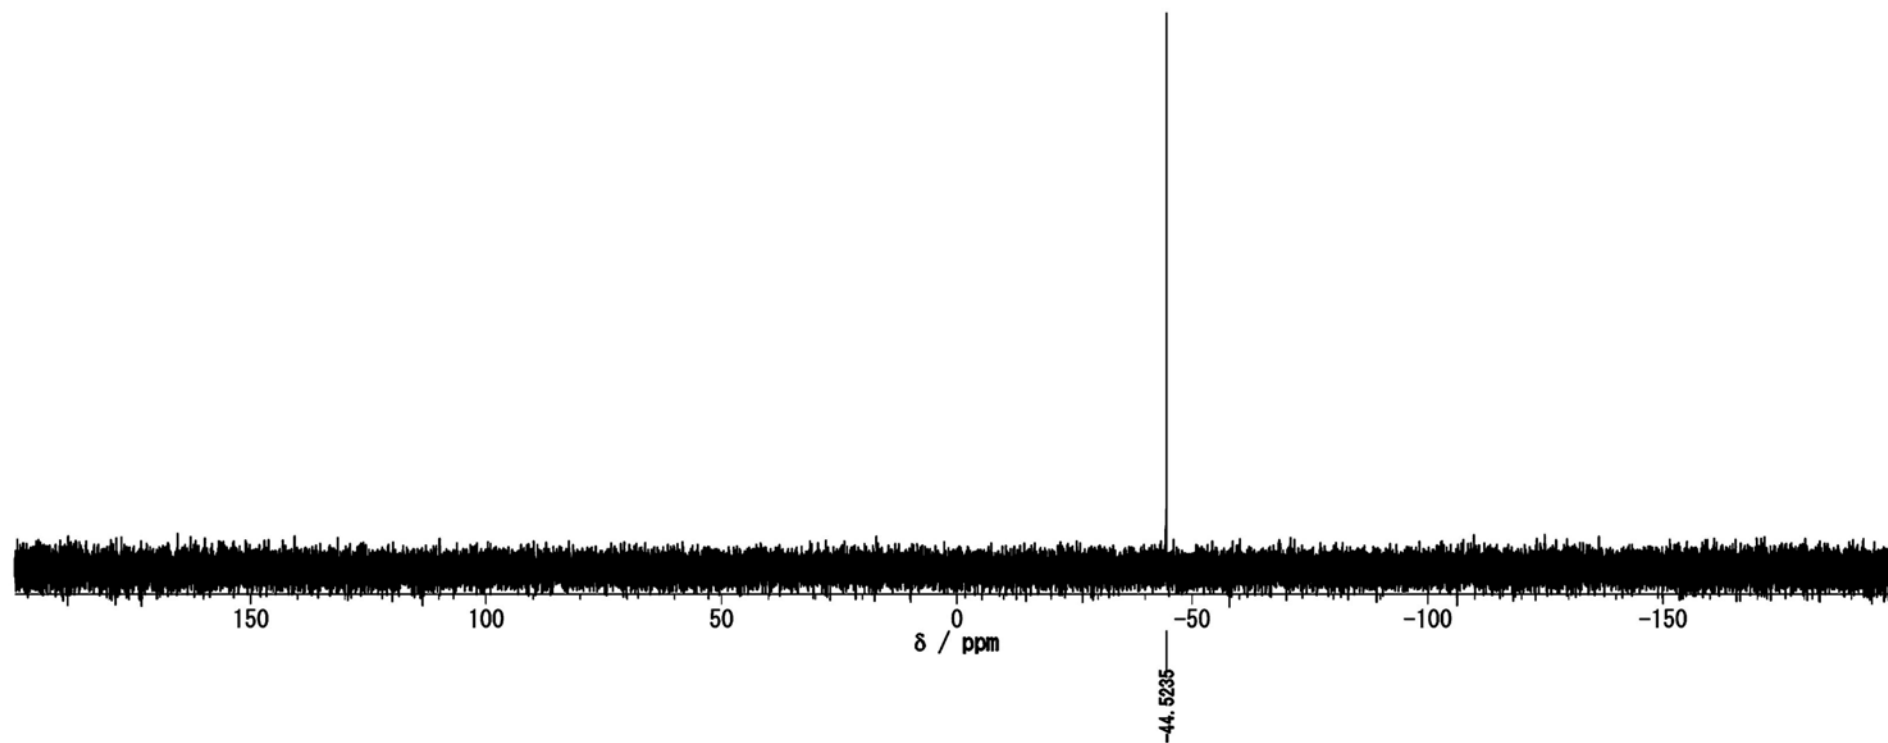

Original File:  
 Date Sep 1 11  
 Comment  
 STANDARD 1H OBSERVE

ObsNuc H  
 ExMode NON  
 ObsFreq 299.96 MHz  
 ObsSet -1.0 kHz  
 ObsPine 995.0047 Hz  
 Point 16384  
 Frequency (Span) 4500.45 Hz  
 Scan 16  
 AcqTime 3.4983 s  
 PD 1.502 s  
 Pulse 6.0  $\mu$ s  
 Temperature 29.0  $^{\circ}$ C  
 Solvent CDCl<sub>3</sub>  
 Reference 0.0 ppm  
 Broad Factor 0.1373 Hz  
 RGain 30  
 Printed 2011/Sep/01 20:49:34  
 Operator

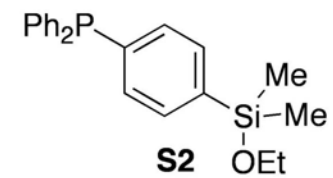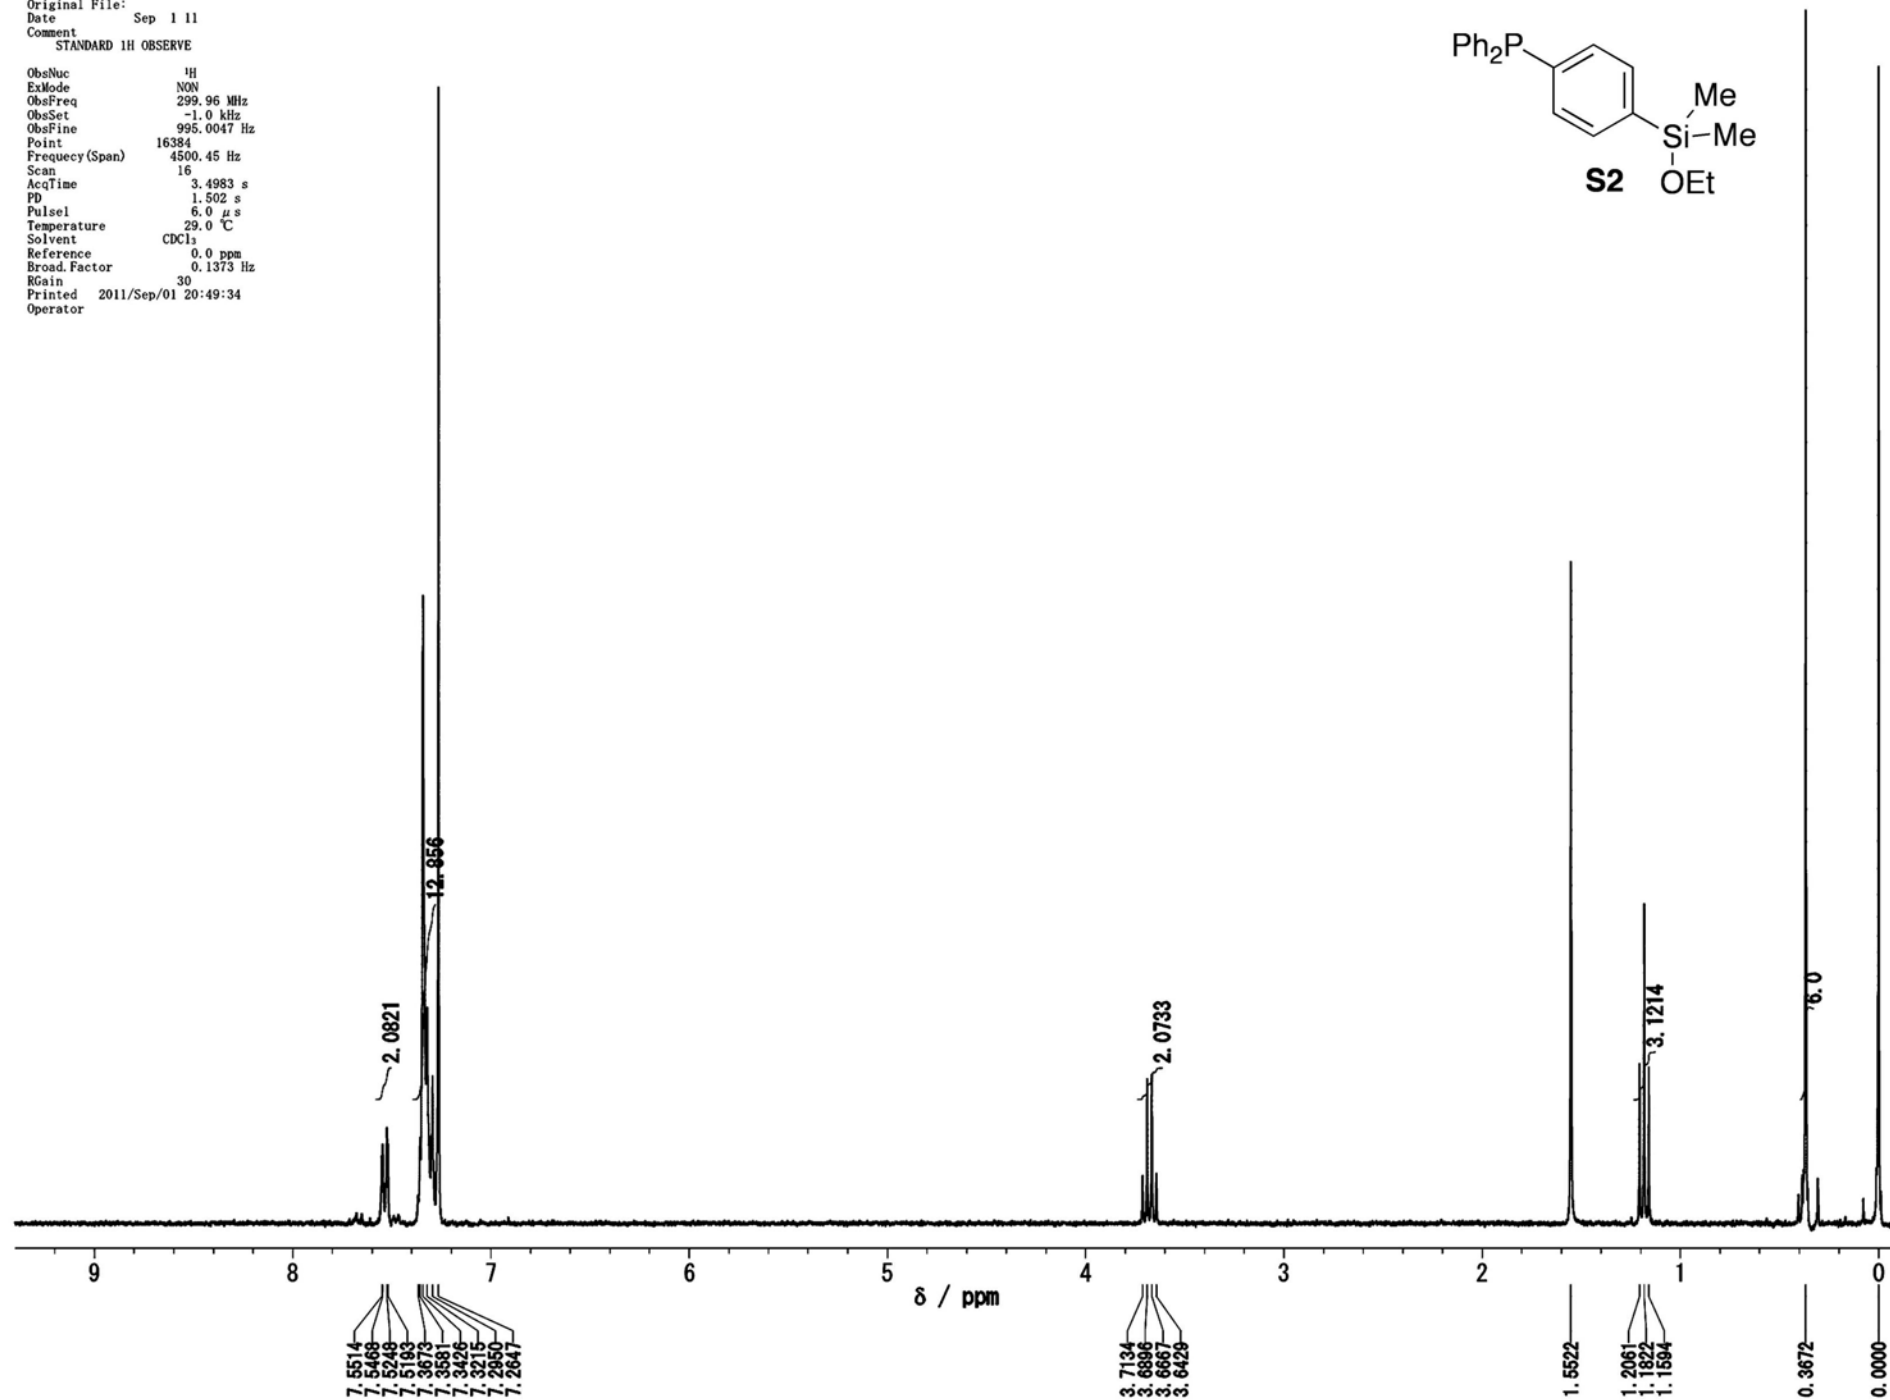

Original File:  
 Date Sep 1 11  
 Comment  
 C13 Statdard Observe  
 Stick=none Tune=6.4 Match=0.4

ObsNuc <sup>13</sup>C  
 ExMode NON  
 ObsFreq 75.43 MHz  
 ObsSet -1.0 kHz  
 ObsFine 996.3672 Hz  
 Point 32768  
 Frequency (Span) 18761.73 Hz  
 Scan 1152  
 AcqTime 1.4992 s  
 PD 1.501 s  
 Pulsel 6.0  $\mu$ s  
 Temperature 29.0  $^{\circ}$ C  
 Solvent CDCl<sub>3</sub>  
 Reference 77.0 ppm  
 Broad.Factor 0.2863 Hz  
 RGain 30  
 Printed 2011/Sep/01 20:48:07  
 Operator

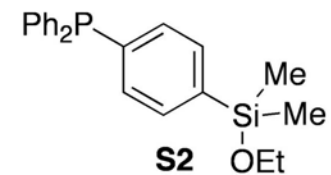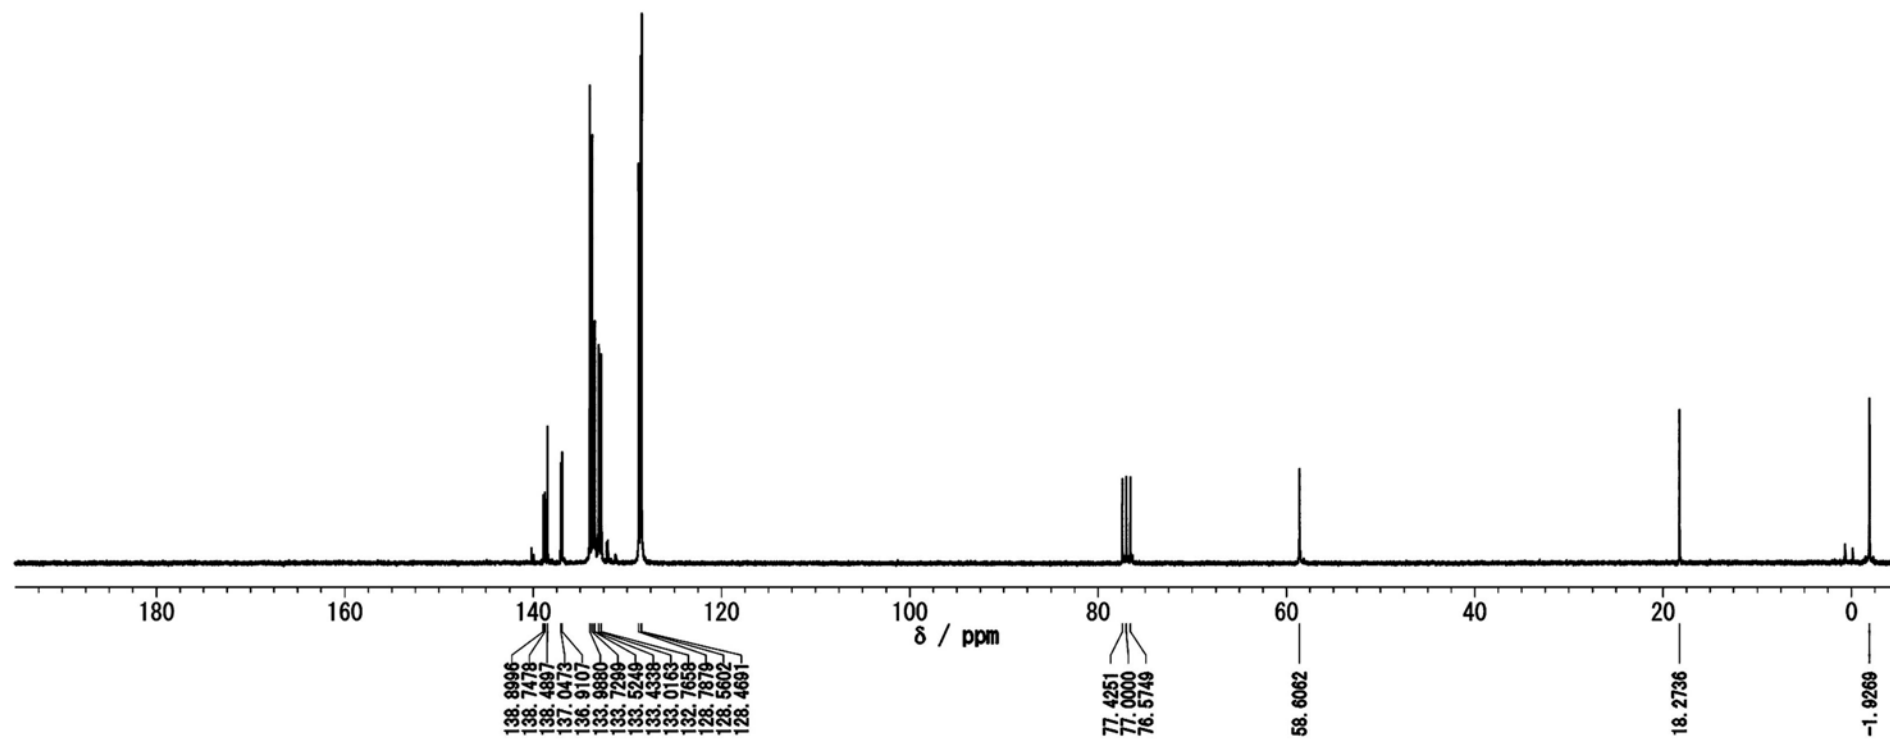

Date Sep 5 11  
 Comment P-31 STANDARD PARAMETERS  
 PHOSPHATE REGION  
 ObsNuc <sup>31</sup>P  
 ExMode  
 ObsFreq 121.42 MHz  
 ObsSet 0.0 kHz  
 ObsFine 0.7799 Hz  
 Point 65536  
 Frequency (Span) 50000.0 Hz  
 Scan 64  
 AcqTime 1.28 s  
 PD 1.4 s  
 Pulse 6.8  $\mu$ s  
 Temperature 29.0  $^{\circ}$ C  
 Solvent CDCl<sub>3</sub>  
 Reference -4.98 ppm  
 Broad Factor 0.25 Hz  
 RGain 30  
 Printed 2011/Sep/05 12:27:44  
 Operator

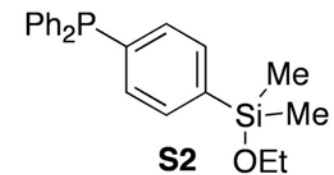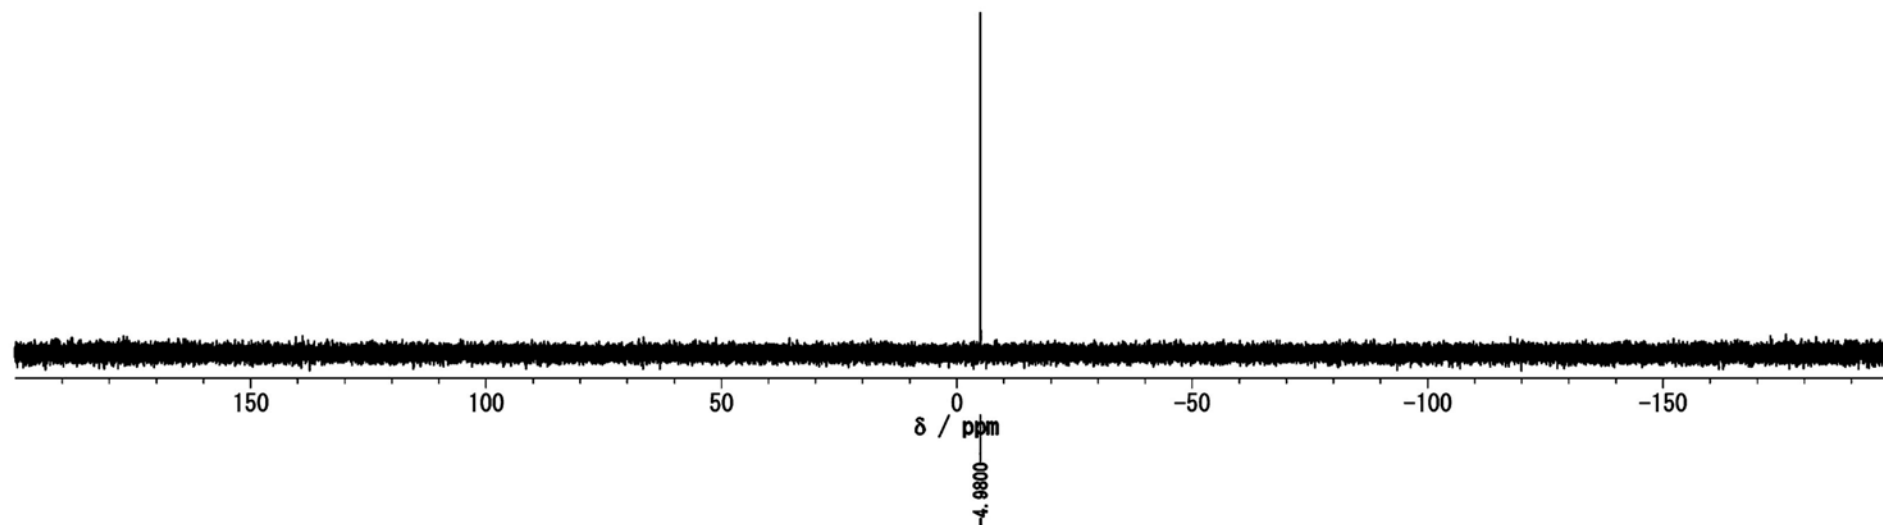

31P CP/MAS TMZ-041

PPM

-51.8697

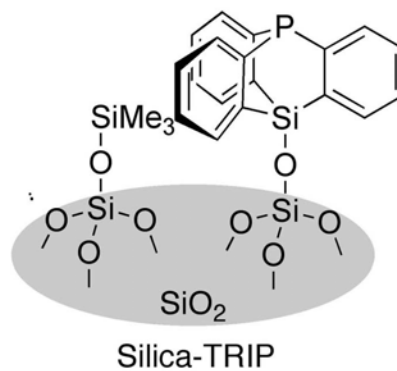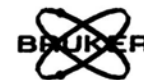

MIYA31P1.614  
PPG:  
CPCYCL.PC  
DATE 17-3-7

SF 121.496  
O1 673.061  
SI 8192  
TD 1870  
SW 35714.286  
HZ/PT 8.719

RG 10  
NE 1  
NS 1300  
TE 295

DW 14.0  
FW 42900  
O2 4980.000  
DP 10H B0

D0 10.000S  
D1 4.000U  
D2 26.000U  
D3 16.000U  
D4 1.000U  
D5 1000.000U  
D6 1.000U  
D7 26.000M  
D11 4.000L  
D12 1.000L

LB 150.000  
GB 0.0  
NC -1  
CX 23.50  
CY 12.00  
SR 681.78

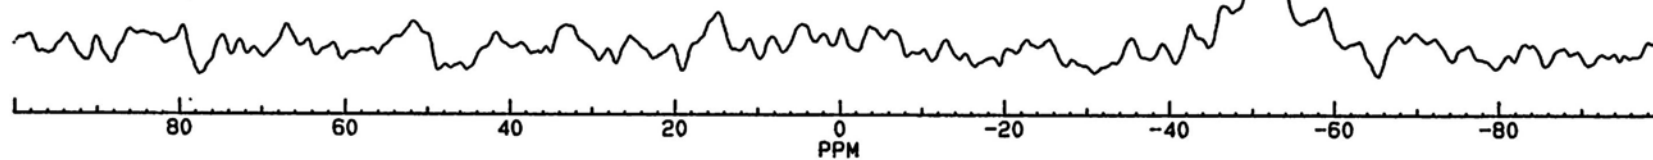



MIYA31P1.609  
PPG:  
CPCYCL.PC  
DATE 9-6-11

SF 121.496  
O1 673.061  
SI 8192  
TD 1870  
SW 35714.286  
HZ/PT 8.719

RG 5  
NE 1  
NS 6811  
TE 295

DW 14.0  
FW 42900  
O2 4980.000  
DP 10H D0

D0 10.000S  
D1 4.000U  
D2 26.000U  
D3 16.000U  
D4 1.000U  
D5 1000.000U  
D6 1.000U  
D7 25.000M  
D11 4.400U  
D12 1.000U

LB 80.000  
GB 0.0  
NC -2  
CX 23.00  
CY 11.00  
SR 699.22

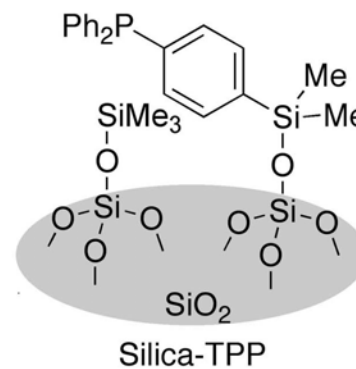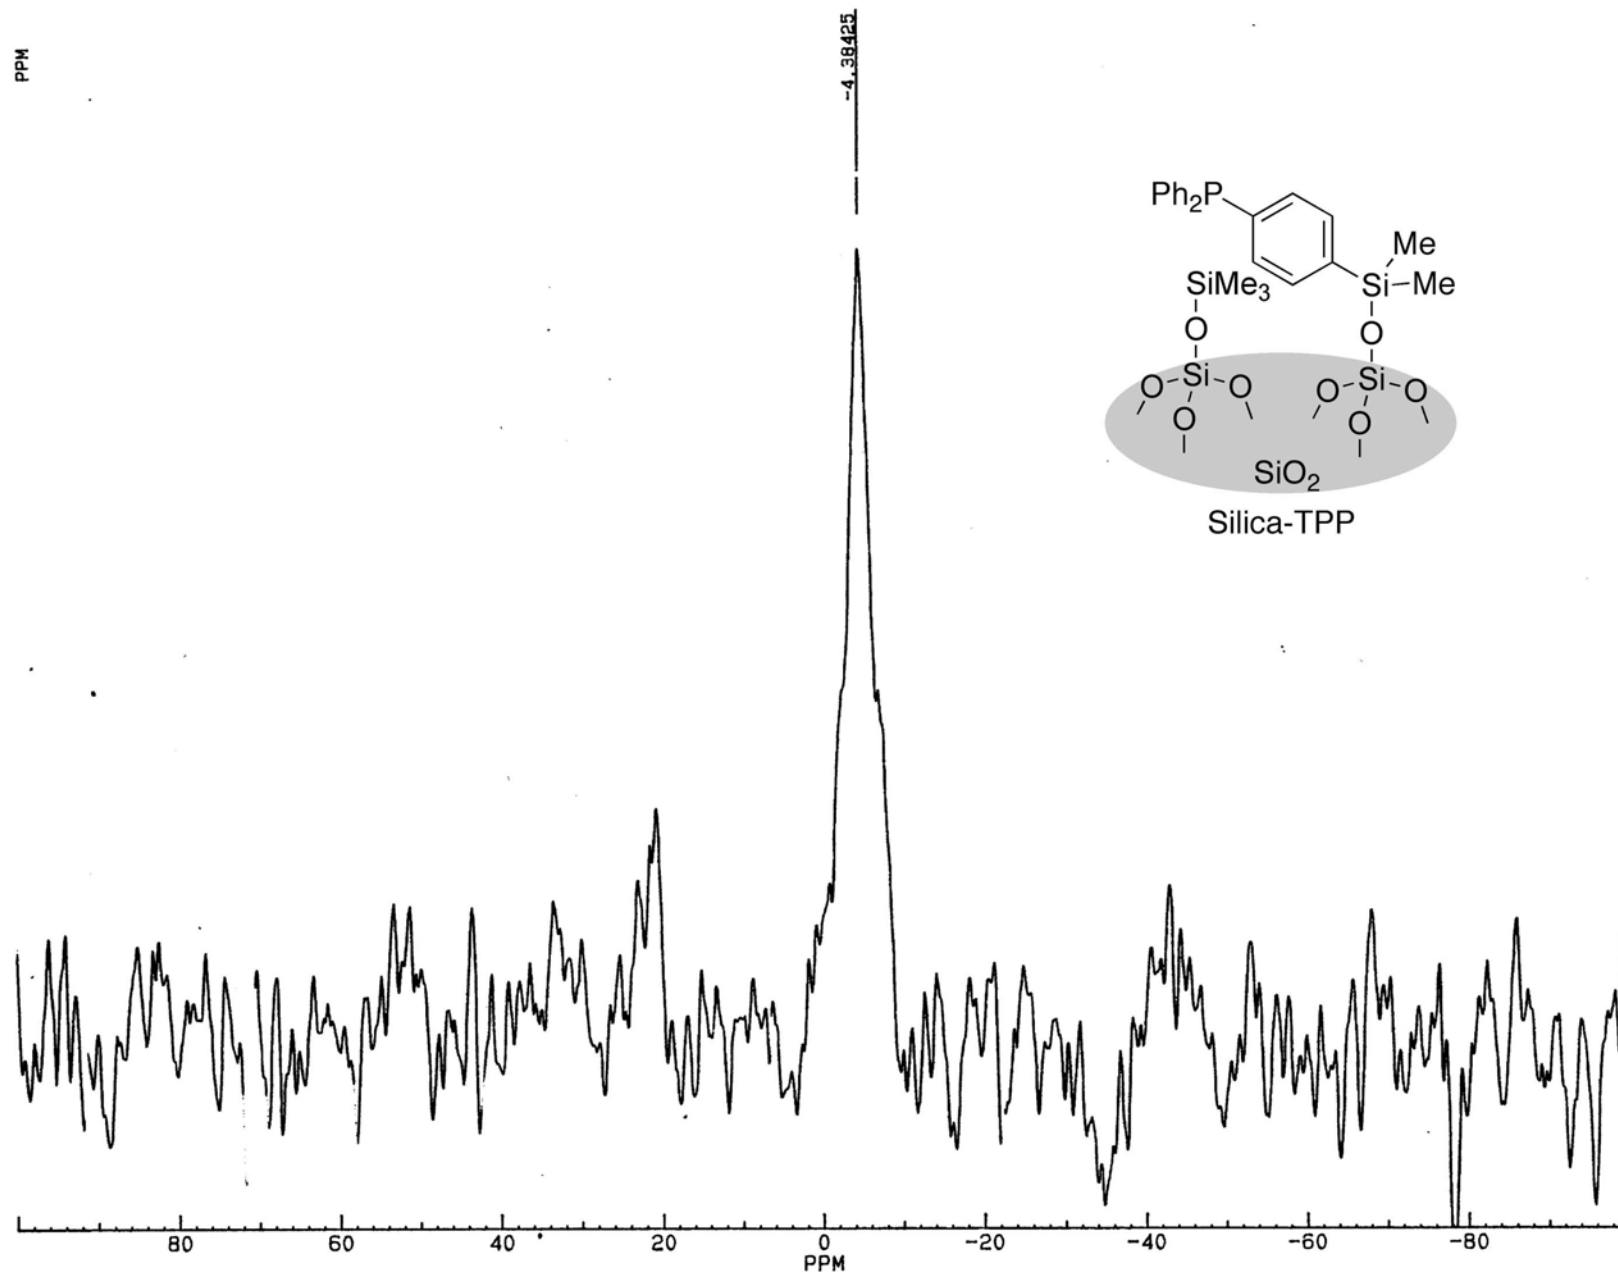

Supplement: Supplementary file 1 [file 4218127]
